# Supplementary material
Source: PubMed Central journal article supplement (PMC3957692)
Supplement: JB.01091-13_zjb999093041so1.pdf [file JB.01091-13_zjb999093041so1.pdf]

**A****B**

**Table S1. Isolate descriptions, sources, and genomic data for *Brucella* and *Ochrobactrum* species used in genomic analyses.**

| Species                 | ID           | Biovar | Host               | Host species                 | Genome size (nt) | Contigs | CDS  | Genes |
|-------------------------|--------------|--------|--------------------|------------------------------|------------------|---------|------|-------|
| <i>B. abortus</i>       | NCTC 8038    | -      | Bovine             | <i>Bos primigenius</i>       | 3276866          | 16      | 3439 | 3538  |
| <i>B. abortus</i>       | S19          | -      | Bovine             | <i>Bos primigenius</i>       | 3283936          | 2       | 3476 | 3591  |
| <i>B. abortus</i>       | 2308A        | -      | Bovine             | <i>Bos primigenius</i>       | 3277197          | 9       | 3473 | 3580  |
| <i>B. abortus</i>       | 2308         | -      | Bovine             | <i>Bos primigenius</i>       | 3278307          | 2       | 3467 | 3578  |
| <i>B. abortus</i>       | 86/8/59      | 2      | Bovine             | <i>Bos primigenius</i>       | 3294912          | 21      | 3574 | 3670  |
| <i>B. abortus</i>       | 9-941        | 1      | Bovine             | <i>Bos primigenius</i>       | 3286445          | 2       | 3476 | 3587  |
| <i>B. abortus</i>       | 292          | 4      | Bovine             | <i>Bos primigenius</i>       | 3272945          | 12      | 3429 | 3567  |
| <i>B. abortus</i>       | C68          | 9      | Bovine             | <i>Bos primigenius</i>       | 3269576          | 13      | 3406 | 3501  |
| <i>B. abortus</i>       | B3196        | 5      | Bovine             | <i>Bos primigenius</i>       | 3343441          | 48      | 3473 | 3567  |
| <i>B. abortus</i>       | 870          | 6      | Bovine             | <i>Bos primigenius</i>       | 3270344          | 13      | 3435 | 3488  |
| <i>B. abortus</i>       | Tulya        | 3      | Human              | <i>Homo sapiens</i>          | 3282764          | 13      | 3521 | 3614  |
| <i>B. melitensis</i>    | 16M          | 1      | Caprine            | <i>Capra hircus</i>          | 3294931          | 2       | 3499 | 3598  |
| <i>B. melitensis</i>    | 16MWGS       | 1      | Caprine            | <i>Capra hircus</i>          | 3291248          | 15      | 3538 | 3624  |
| <i>B. melitensis</i>    | REV1         | -      | Caprine            | <i>Capra hircus</i>          | 3305822          | 26      | 3440 | 3528  |
| <i>B. melitensis</i>    | ATCC 23457   | 2      | Caprine            | <i>Capra hircus</i>          | 3311219          | 2       | 3486 | 3590  |
| <i>B. melitensis</i>    | 63/9         | 2      | Caprine            | <i>Capra hircus</i>          | 3284951          | 60      | 3447 | 3533  |
| <i>B. melitensis</i>    | Ether        | 3      | Caprine            | <i>Capra hircus</i>          | 3308792          | 13      | 3457 | 3548  |
| <i>B. ovis</i>          | ATCC 25840   | -      | Ovine              | <i>Ovis aries</i>            | 3275590          | 2       | 3543 | 3656  |
| <i>Brucella sp.</i>     | NVSL 07-0026 | -      | Baboon             | <i>Papio sp.</i>             | 3297137          | 17      | 3531 | 3645  |
| <i>B. ceti</i>          | M490/95/1    | -      | Common seal        | <i>Phoca vitulina</i>        | 3345471          | 17      | 3386 | 3460  |
| <i>B. ceti</i>          | B1/94        | -      | Harbor porpoise    | <i>Phocoena phocoena</i>     | 3337159          | 14      | 3386 | 3465  |
| <i>B. ceti</i>          | F5/99        | -      | Bottlenose dolphin | <i>Tursiops truncatus</i>    | 3336716          | 18      | 3359 | 3433  |
| <i>B. ceti</i>          | Cudo         | -      | Bottlenose dolphin | <i>Tursiops truncatus</i>    | 3389269          | 7       | 3610 | 3709  |
| <i>B. pinnipedialis</i> | B2/94        | -      | Common seal        | <i>Phoca vitulina</i>        | 3398674          | 19      | 3425 | 3502  |
| <i>B. pinnipedialis</i> | M292/94/1    | -      | Common seal        | <i>Phoca vitulina</i>        | 3373519          | 15      | 3399 | 3470  |
| <i>B. pinnipedialis</i> | M163/99/10   | -      | Hooded seal        | <i>Cystophora cristata</i>   | 3404050          | 89      | 3453 | 3541  |
| <i>B. ceti</i>          | M13/05/01    | -      | Striped dolphin    | <i>Stenella coeruleoalba</i> | 3334689          | 17      | 3414 | 3496  |
| <i>B. ceti</i>          | M644/93/1    | -      | Common dolphin     | <i>Delphinus delphis</i>     | 3337230          | 22      | 3406 | 3491  |
| <i>B. canis</i>         | RM6/66       | -      | Dog                | <i>Canis domesticus</i>      | 3312769          | 2       | 3435 | 3523  |
| <i>B. suis</i>          | 40           | 4      | Reindeer           | <i>Rangifer tarandus</i>     | 3307260          | 12      | 3388 | 3470  |
| <i>B. suis</i>          | 686          | 3      | Swine              | <i>Sus scrofa</i>            | 3298529          | 23      | 3515 | 3593  |
| <i>B. suis</i>          | 1330         | 1      | Swine              | <i>Sus scrofa</i>            | 3315175          | 2       | 3432 | 3521  |
| <i>B. suis</i>          | Thomsen      | 2      | Swine              | <i>Sus scrofa</i>            | 3324607          | 2       | 3591 | 3681  |
| <i>B. suis</i>          | 513          | 5      | Rodent             | Rodentia                     | 3323676          | 19      | 3377 | 3430  |
| <i>B. neotomae</i>      | 5K33         | -      | Desert woodrat     | <i>Neotoma lepida</i>        | 3329623          | 11      | 3434 | 3509  |
| <i>B. microti</i>       | CCM 4915     | -      | Common vole        | <i>Microtus arvalis</i>      | 3337369          | 2       | 3410 | 3490  |
| <i>Brucella sp.</i>     | NF2653       | -      | Australian rodents | Rodentia                     | 3110281          | 113     | 3167 | 3239  |
| <i>Brucella sp.</i>     | 83/13        | -      | Australian rodents | Rodentia                     | 3153851          | 20      | 3167 | 3235  |
| <i>B. inopinata</i>     | BO1          | -      | Human              | <i>Homo sapiens</i>          | 3366774          | 55      | 3330 | 3390  |
| <i>B. inopinata</i>     | BO2          | -      | Human              | <i>Homo sapiens</i>          | 3305941          | 174     | 3251 | 3311  |
| <i>O. anthropi</i>      | LMG3331      | -      | Human              | <i>Homo sapiens</i>          | 5205777          | 6       | 5025 | 5095  |
| <i>O. intermedium</i>   | LMG3301      | -      | Human              | <i>Homo sapiens</i>          | 4725392          | 4       | 4533 | 4617  |

Table S2. *Ochrobactrum anthropi* ortholog groups that are not present in *Brucella*.

| <i>Ochrobactrum intermedium</i> LMG 3301<br><i>Bartonella quintana</i> str. Toulouse<br><i>Mesorhizobium loti</i> MAFF303099<br><i>Agrobacterium tumefaciens</i> str. C58 | <i>Ochrobactrum anthropi</i> ATCC 49188<br>PATRIC locus tag | <i>Ochrobactrum anthropi</i> ATCC 49188<br>RefSeq locus tag | Product             |           |                                                                          |
|---------------------------------------------------------------------------------------------------------------------------------------------------------------------------|-------------------------------------------------------------|-------------------------------------------------------------|---------------------|-----------|--------------------------------------------------------------------------|
| √                                                                                                                                                                         | √                                                           | √                                                           | VBIOchAnt73124_0007 | Oant_0007 | PUTATIVE ACETYLTRANSFERASE PROTEIN( EC:2.3.1.- )                         |
| √                                                                                                                                                                         | √                                                           | √                                                           | VBIOchAnt73124_0008 | Oant_0008 | hypothetical protein                                                     |
| √                                                                                                                                                                         |                                                             |                                                             | VBIOchAnt73124_0062 | Oant_0060 | Glucose-methanol-choline (GMC) oxidoreductase:NAD binding site           |
| √                                                                                                                                                                         |                                                             |                                                             | VBIOchAnt73124_0063 | Oant_0061 | Tat (Twin-arginine translocation) pathway signal sequence domain protein |
| √                                                                                                                                                                         | √                                                           | √                                                           | VBIOchAnt73124_0068 | Oant_0066 | Transcriptional regulator, AraC family                                   |
| √                                                                                                                                                                         | √                                                           | √                                                           | VBIOchAnt73124_0069 | Oant_0067 | Uncharacterized protein conserved in bacteria                            |
| √                                                                                                                                                                         | √                                                           | √                                                           | VBIOchAnt73124_0070 | Oant_0068 | Transcriptional regulator FrcR for fructose utilization, ROK family      |
| √                                                                                                                                                                         | √                                                           | √                                                           | VBIOchAnt73124_0071 | Oant_0069 | Fructose ABC transporter, substrate-binding component FrcB               |
| √                                                                                                                                                                         | √                                                           | √                                                           | VBIOchAnt73124_0072 | Oant_0070 | Fructose ABC transporter, permease component FrcC                        |
| √                                                                                                                                                                         |                                                             |                                                             | VBIOchAnt73124_0084 | Oant_0082 | hypothetical protein                                                     |
| √                                                                                                                                                                         |                                                             |                                                             | VBIOchAnt73124_0085 | Oant_0083 | Transcriptional regulator, MarR family                                   |
| √                                                                                                                                                                         |                                                             |                                                             | VBIOchAnt73124_0086 | Oant_0084 | hypothetical protein                                                     |
| √                                                                                                                                                                         |                                                             |                                                             | VBIOchAnt73124_0087 | Oant_0085 | Methionine aminopeptidase                                                |
| √                                                                                                                                                                         | √                                                           |                                                             | VBIOchAnt73124_0089 | Oant_0087 | Antibiotic biosynthesis monooxygenase                                    |
| √                                                                                                                                                                         |                                                             |                                                             | VBIOchAnt73124_0096 | Oant_0093 | hypothetical protein                                                     |
| √                                                                                                                                                                         |                                                             |                                                             | VBIOchAnt73124_0123 | Oant_0116 | hypothetical protein                                                     |
| √                                                                                                                                                                         | √                                                           | √                                                           | VBIOchAnt73124_0136 | Oant_0128 | RhtB family transporter                                                  |
| √                                                                                                                                                                         | √                                                           | √                                                           | VBIOchAnt73124_0142 | Oant_0134 | hypothetical protein                                                     |
| √                                                                                                                                                                         | √                                                           | √                                                           | VBIOchAnt73124_0149 | Oant_0140 | small molecule metabolism                                                |
| √                                                                                                                                                                         |                                                             | √                                                           | VBIOchAnt73124_0155 | Oant_0146 | hypothetical protein                                                     |
| √                                                                                                                                                                         | √                                                           |                                                             | VBIOchAnt73124_0215 | Oant_0203 | Integrase                                                                |
| √                                                                                                                                                                         |                                                             |                                                             | VBIOchAnt73124_0264 | Oant_0247 | hypothetical protein                                                     |
| √                                                                                                                                                                         | √                                                           | √                                                           | VBIOchAnt73124_0295 | Oant_0275 | Cyclic beta-1,2-glucan modification transmembrane protein                |
| √                                                                                                                                                                         | √                                                           | √                                                           | VBIOchAnt73124_0309 | Oant_0288 | 6-phosphofructokinase, PF08013 family                                    |
| √                                                                                                                                                                         | √                                                           | √                                                           | VBIOchAnt73124_0310 | Oant_0289 | Fructokinase                                                             |
| √                                                                                                                                                                         | √                                                           |                                                             | VBIOchAnt73124_0311 | Oant_0290 | Ribose ABC transport system, permease protein RbsC (TC 3.A.1.2.1)        |

|   |   |                     |                     |                                                                           |                                                                                             |
|---|---|---------------------|---------------------|---------------------------------------------------------------------------|---------------------------------------------------------------------------------------------|
| √ |   | VBIOchAnt73124_0312 | Oant_0291           | Putative ribose/galactose/methyl galactoside import ATP-binding protein 1 |                                                                                             |
| √ | √ | √                   | VBIOchAnt73124_0313 | Oant_0292                                                                 | Ribose/xylose/arabinose/galactoside ABC-type transport systems, substrate-binding component |
|   |   |                     | VBIOchAnt73124_0314 | hypothetical protein                                                      |                                                                                             |
| √ | √ | √                   | VBIOchAnt73124_0315 | Oant_0293                                                                 | Ribose operon repressor                                                                     |
| √ | √ | √                   | VBIOchAnt73124_0316 | Oant_0294                                                                 | Glucose dehydrogenase, PQQ-dependent                                                        |
| √ | √ | √                   | VBIOchAnt73124_0342 | Oant_0320                                                                 | hypothetical protein                                                                        |
| √ |   |                     | VBIOchAnt73124_0351 | hypothetical protein                                                      |                                                                                             |
| √ | √ | √                   | VBIOchAnt73124_0352 | Oant_0330                                                                 | cytochrome c oxidase subunit I                                                              |
| √ | √ | √                   | VBIOchAnt73124_0355 | Oant_0333                                                                 | Urease accessory protein UreD                                                               |
| √ | √ | √                   | VBIOchAnt73124_0361 | Oant_0339                                                                 | Deoxyribodipyrimidine photolyase                                                            |
| √ |   |                     | VBIOchAnt73124_0363 | hypothetical protein                                                      |                                                                                             |
| √ | √ | √                   | VBIOchAnt73124_0366 | Oant_0343                                                                 | Pyrimidine ABC transporter, substrate-binding component                                     |
| √ | √ | √                   | VBIOchAnt73124_0367 | Oant_0344                                                                 | Pyrimidine ABC transporter, transmembrane component 2                                       |
| √ | √ | √                   | VBIOchAnt73124_0368 | Oant_0345                                                                 | Pyrimidine ABC transporter, transmembrane component 1                                       |
| √ | √ | √                   | VBIOchAnt73124_0369 | Oant_0346                                                                 | Pyrimidine ABC transporter, ATP-binding protein                                             |
| √ | √ |                     | VBIOchAnt73124_0374 | Oant_0351                                                                 | Maltose/maltodextrin transport ATP-binding protein MalK                                     |
| √ | √ | √                   | VBIOchAnt73124_0376 | Oant_0353                                                                 | ABC-type sugar transport systems, permease components                                       |
| √ | √ | √                   | VBIOchAnt73124_0377 | Oant_0354                                                                 | Sugar ABC transporter, periplasmic sugar-binding protein                                    |
| √ | √ | √                   | VBIOchAnt73124_0378 | Oant_0355                                                                 | Cystathionine gamma-synthase                                                                |
| √ | √ | √                   | VBIOchAnt73124_0379 | Oant_0356                                                                 | Transcriptional regulator, GntR family                                                      |
| √ | √ | √                   | VBIOchAnt73124_0380 | Oant_0357                                                                 | L-fuco-beta-pyranose dehydrogenase                                                          |
| √ | √ | √                   | VBIOchAnt73124_0381 | Oant_0358                                                                 | Ribokinase                                                                                  |
| √ | √ |                     | VBIOchAnt73124_0382 | Oant_0359                                                                 | Dihydrodipicolinate synthase                                                                |
| √ | √ | √                   | VBIOchAnt73124_0383 | Oant_0360                                                                 | Transcriptional regulator, GntR family                                                      |
| √ | √ | √                   | VBIOchAnt73124_0384 | Oant_0361                                                                 | Sugar ABC transporter, periplasmic sugar-binding protein                                    |
| √ | √ | √                   | VBIOchAnt73124_0385 | Oant_0362                                                                 | ABC-type sugar transport systems, permease components                                       |
| √ | √ |                     | VBIOchAnt73124_0386 | Oant_0363                                                                 | Maltose/maltodextrin ABC transporter, permease protein MalG                                 |
| √ | √ | √                   | VBIOchAnt73124_0387 | Oant_0364                                                                 | Maltose/maltodextrin transport ATP-binding protein MalK                                     |
| √ | √ | √                   | VBIOchAnt73124_0390 | Oant_0367                                                                 | carbon monoxide dehydrogenase G protein                                                     |
| √ | √ |                     | VBIOchAnt73124_0406 | Oant_0382                                                                 | hypothetical protein                                                                        |
| √ | √ |                     | VBIOchAnt73124_0407 | Oant_0383                                                                 | glycosyl transferase, family 2                                                              |
| √ |   |                     | VBIOchAnt73124_0408 | Oant_0384                                                                 | hypothetical protein                                                                        |
| √ | √ | √                   | VBIOchAnt73124_0409 | Oant_0385                                                                 | conserved hypothetical membrane protein                                                     |
| √ | √ |                     | VBIOchAnt73124_0411 | Oant_0386                                                                 | putative cell-surface polysaccharide exporter protein, PST family                           |
| √ | √ |                     | VBIOchAnt73124_0412 | Oant_0387                                                                 | succinoglycan biosynthesis transport protein                                                |
| √ | √ | √                   | VBIOchAnt73124_0437 | Oant_0411                                                                 | Aspartate aminotransferase                                                                  |
| √ |   |                     | VBIOchAnt73124_0439 | Oant_0413                                                                 | hypothetical protein                                                                        |
| √ |   |                     | VBIOchAnt73124_0442 | Oant_0416                                                                 | hypothetical protein                                                                        |

|   |       |                     |           |                                                                                    |
|---|-------|---------------------|-----------|------------------------------------------------------------------------------------|
| √ |       | VBIOchAnt73124_0444 | Oant_0418 | protein of unknown function DUF1127                                                |
| √ | √     | VBIOchAnt73124_0450 | Oant_0423 | Glyoxalase family protein                                                          |
| √ | √     | VBIOchAnt73124_0451 | Oant_0424 | Glyoxalase family protein                                                          |
| √ | √ √   | VBIOchAnt73124_0455 | Oant_0428 | Predicted NAD regulator in Alphaproteobacteria                                     |
| √ | √ √   | VBIOchAnt73124_0456 | Oant_0429 | Quinolinate synthetase                                                             |
| √ | √ √   | VBIOchAnt73124_0457 | Oant_0430 | L-aspartate oxidase                                                                |
| √ | √ √   | VBIOchAnt73124_0458 | Oant_0431 | Quinolinate phosphoribosyltransferase [decarboxylating]                            |
| √ |       | VBIOchAnt73124_0460 |           | hypothetical protein                                                               |
| √ | √     | VBIOchAnt73124_0461 | Oant_0432 | Transcriptional regulator, TetR family                                             |
| √ |       | VBIOchAnt73124_0463 | Oant_0434 | Superoxide dismutase [Fe]                                                          |
| √ |       | VBIOchAnt73124_0464 | Oant_0435 | hypothetical protein                                                               |
| √ | √ √ √ | VBIOchAnt73124_0465 | Oant_0436 | Putative transport protein                                                         |
| √ |       | VBIOchAnt73124_0476 | Oant_0447 | ATP/GTP-binding site motif A (P-loop) :Porin, alpha proteobacteria type            |
| √ |       | VBIOchAnt73124_0479 | Oant_0450 | Transthyretin family protein                                                       |
| √ | √ √   | VBIOchAnt73124_0486 | Oant_0457 | Negative regulator of allantoin and glyoxylate utilization operons                 |
| √ | √     | VBIOchAnt73124_0487 | Oant_0458 | Glyoxylate carboligase                                                             |
| √ | √     | VBIOchAnt73124_0490 | Oant_0460 | 2-hydroxy-3-oxopropionate reductase                                                |
| √ |       | VBIOchAnt73124_0498 |           | hypothetical protein                                                               |
| √ |       | VBIOchAnt73124_0503 | Oant_0472 | Cytochrome c-type biogenesis protein DsbD, protein-disulfide reductase             |
| √ | √     | VBIOchAnt73124_0505 | Oant_0473 | hypothetical protein                                                               |
| √ | √     | VBIOchAnt73124_0509 | Oant_0477 | hypothetical protein                                                               |
| √ | √     | VBIOchAnt73124_0513 | Oant_0481 | hypothetical protein                                                               |
| √ | √ √   | VBIOchAnt73124_0514 | Oant_0482 | Transcriptional regulator, ArsR family                                             |
| √ | √ √   | VBIOchAnt73124_0516 | Oant_0483 | hypothetical protein                                                               |
| √ | √ √   | VBIOchAnt73124_0522 | Oant_0489 | Probable signal peptide protein                                                    |
| √ |       | VBIOchAnt73124_0527 | Oant_0494 | hypothetical protein                                                               |
| √ | √     | VBIOchAnt73124_0530 | Oant_0497 | Gfa-like protein                                                                   |
| √ |       | VBIOchAnt73124_0531 |           | hypothetical protein                                                               |
| √ | √ √   | VBIOchAnt73124_0539 | Oant_0505 | Transcriptional regulator, AsnC family                                             |
| √ | √ √   | VBIOchAnt73124_0540 | Oant_0506 | L-lysine permease                                                                  |
| √ |       | VBIOchAnt73124_0542 |           | hypothetical protein                                                               |
| √ |       | VBIOchAnt73124_0546 | Oant_0511 | hypothetical protein                                                               |
| √ |       | VBIOchAnt73124_0551 | Oant_0516 | hypothetical protein                                                               |
| √ |       | VBIOchAnt73124_0556 |           | hypothetical protein                                                               |
| √ |       | VBIOchAnt73124_0559 | Oant_0523 | hypothetical protein                                                               |
| √ |       | VBIOchAnt73124_0569 | Oant_0532 | diguanylate cyclase/phosphodiesterase (GGDEF & EAL domains) with PAS/PAC sensor(s) |
| √ | √ √   | VBIOchAnt73124_0574 | Oant_0537 | hypothetical protein                                                               |
| √ | √ √   | VBIOchAnt73124_0587 | Oant_0550 | Aspartate racemase                                                                 |
| √ | √     | VBIOchAnt73124_0591 | Oant_0554 | transcriptional regulator, ArsR family                                             |

|   |   |   |                     |           |                                                                                     |
|---|---|---|---------------------|-----------|-------------------------------------------------------------------------------------|
| √ | √ | √ | VBIOchAnt73124_0596 | Oant_0558 | hypothetical protein                                                                |
| √ |   |   | VBIOchAnt73124_0617 |           | hypothetical protein                                                                |
| √ | √ | √ | VBIOchAnt73124_0649 | Oant_0610 | dTDP-glucose 4,6-dehydratase                                                        |
| √ | √ | √ | VBIOchAnt73124_0685 | Oant_0647 | Type IV secretion system protein VirD4                                              |
| √ | √ | √ | VBIOchAnt73124_0687 | Oant_0650 | hypothetical protein                                                                |
| √ |   | √ | VBIOchAnt73124_0709 | Oant_0672 | hypothetical protein                                                                |
| √ | √ | √ | VBIOchAnt73124_0711 | Oant_0675 | Major pilus subunit of type IV secretion complex (VirB2)                            |
| √ | √ | √ | VBIOchAnt73124_0712 | Oant_0676 | Inner membrane protein forms channel for type IV secretion of T-DNA complex (VirB3) |
| √ |   | √ | VBIOchAnt73124_0714 | Oant_0678 | Minor pilin of type IV secretion complex (VirB5)                                    |
| √ | √ | √ | VBIOchAnt73124_0716 | Oant_0680 | Integral inner membrane protein of type IV secretion complex (VirB6)                |
| √ | √ | √ | VBIOchAnt73124_0719 | Oant_0683 | secretin-like domain, VirB9                                                         |
| √ |   |   | VBIOchAnt73124_0725 | Oant_0689 | Putative diheme cytochrome c-553                                                    |
| √ |   |   | VBIOchAnt73124_0748 | Oant_0710 | IS66 Orf2 family protein                                                            |
| √ |   |   | VBIOchAnt73124_0749 | Oant_0711 | Transposase                                                                         |
| √ | √ | √ | VBIOchAnt73124_0755 | Oant_0717 | hypothetical protein                                                                |
| √ | √ | √ | VBIOchAnt73124_0756 | Oant_0718 | Similar to TadZ/CpaE, associated with Flp pilus assembly                            |
| √ | √ | √ | VBIOchAnt73124_0757 | Oant_0719 | Similar to secretin RcpA/CpaC, associated with Flp pilus assembly                   |
| √ |   |   | VBIOchAnt73124_0758 | Oant_0720 | Flp/Fap pilin component                                                             |
| √ | √ | √ | VBIOchAnt73124_0760 | Oant_0721 | Type IV prepilin peptidase TadV/CpaA                                                |
| √ | √ | √ | VBIOchAnt73124_0761 | Oant_0722 | Flp pilus assembly protein RcpC/CpaB                                                |
| √ | √ | √ | VBIOchAnt73124_0763 | Oant_0723 | Type II/IV secretion system secretin RcpA/CpaC, associated with Flp pilus assembly  |
| √ | √ | √ | VBIOchAnt73124_0764 | Oant_0724 | Flp pilus assembly protein CpaD                                                     |
| √ | √ | √ | VBIOchAnt73124_0765 | Oant_0725 | Type II/IV secretion system ATPase TadZ/CpaE, associated with Flp pilus assembly    |
| √ | √ | √ | VBIOchAnt73124_0766 | Oant_0726 | Type II/IV secretion system ATP hydrolase TadA/VirB11/CpaF, TadA subfamily          |
| √ | √ | √ | VBIOchAnt73124_0767 | Oant_0727 | Flp pilus assembly protein TadB                                                     |
| √ | √ | √ | VBIOchAnt73124_0768 | Oant_0728 | Type II/IV secretion system protein TadC, associated with Flp pilus assembly        |
| √ | √ | √ | VBIOchAnt73124_0769 | Oant_0729 | Flp pilus assembly protein TadD, contains TPR repeat                                |
| √ |   |   | VBIOchAnt73124_0775 |           | hypothetical protein                                                                |
| √ |   |   | VBIOchAnt73124_0809 |           | hypothetical protein                                                                |
| √ | √ |   | VBIOchAnt73124_0819 | Oant_0776 | Ribosomal protein S6 glutaminyl transferase                                         |
| √ | √ |   | VBIOchAnt73124_0822 | Oant_0779 | Glyoxalase/bleomycin resistance protein/dioxygenase                                 |
| √ | √ |   | VBIOchAnt73124_0830 | Oant_0787 | NADPH:quinone oxidoreductase                                                        |
| √ | √ |   | VBIOchAnt73124_0836 | Oant_0792 | hypothetical protein                                                                |
| √ | √ | √ | VBIOchAnt73124_0838 | Oant_0794 | Aldo-keto reductase                                                                 |
| √ |   |   | VBIOchAnt73124_0839 | Oant_0795 | hypothetical protein                                                                |
| √ |   |   | VBIOchAnt73124_0840 | Oant_0796 | Transcriptional regulator, TetR family                                              |
| √ |   |   | VBIOchAnt73124_0868 | Oant_0823 | Glutamate racemase                                                                  |
| √ |   |   | VBIOchAnt73124_0876 | Oant_0831 | hypothetical protein                                                                |
| √ | √ | √ | VBIOchAnt73124_0885 | Oant_0840 | hypothetical protein                                                                |

|   |       |                     |           |                                                                                    |
|---|-------|---------------------|-----------|------------------------------------------------------------------------------------|
| √ |       | VBIOchAnt73124_0912 |           | hypothetical protein                                                               |
| √ | √     | VBIOchAnt73124_0960 | Oant_0916 | Oxidoreductase, short-chain dehydrogenase/reductase family                         |
| √ |       | VBIOchAnt73124_0984 | Oant_0940 | hypothetical protein                                                               |
| √ | √     | VBIOchAnt73124_0989 | Oant_0945 | hypothetical protein                                                               |
| √ |       | VBIOchAnt73124_0994 | Oant_0949 | hypothetical protein                                                               |
| √ | √     | VBIOchAnt73124_1001 | Oant_0956 | osmotically inducible protein C, putative ATP/GTP binding protein                  |
| √ | √     | VBIOchAnt73124_1009 | Oant_0963 | hypothetical protein                                                               |
| √ |       | VBIOchAnt73124_1013 | Oant_0967 | Xanthine permease                                                                  |
| √ |       | VBIOchAnt73124_1030 | Oant_0983 | hypothetical protein                                                               |
| √ | √ √   | VBIOchAnt73124_1049 | Oant_1001 | Homoserine/homoserine lactone efflux protein                                       |
| √ | √ √   | VBIOchAnt73124_1052 | Oant_1003 | Permease of the drug/metabolite transporter (DMT) superfamily                      |
| √ | √ √   | VBIOchAnt73124_1069 | Oant_1020 | similar to polysaccharide biosynthesis related protein                             |
| √ | √ √   | VBIOchAnt73124_1092 | Oant_1044 | Na <sup>+</sup> -driven multidrug efflux pump                                      |
| √ | √ √   | VBIOchAnt73124_1093 | Oant_1045 | diguanylate cyclase/phosphodiesterase (GGDEF & EAL domains) with PAS/PAC sensor(s) |
| √ | √     | VBIOchAnt73124_1094 | Oant_1046 | conserved hypothetical protein                                                     |
| √ | √     | VBIOchAnt73124_1095 | Oant_1047 | Ribosomal large subunit pseudouridine synthase A                                   |
| √ | √ √   | VBIOchAnt73124_1112 | Oant_1063 | Possible divergent polysaccharide deacetylase                                      |
| √ | √     | VBIOchAnt73124_1118 | Oant_1069 | hypothetical protein                                                               |
| √ | √     | VBIOchAnt73124_1119 | Oant_1070 | Putative oxidoreductase YncB                                                       |
| √ | √     | VBIOchAnt73124_1122 | Oant_1073 | hypothetical protein                                                               |
| √ |       | VBIOchAnt73124_1148 | Oant_1098 | putative RecF protein                                                              |
| √ | √ √   | VBIOchAnt73124_1174 | Oant_1124 | MFS permease protein                                                               |
| √ | √     | VBIOchAnt73124_1175 | Oant_1125 | Transcriptional regulator, HxLR family                                             |
| √ |       | VBIOchAnt73124_1182 |           | hypothetical protein                                                               |
| √ |       | VBIOchAnt73124_1183 |           | hypothetical protein                                                               |
| √ | √ √   | VBIOchAnt73124_1199 | Oant_1146 | Oxidoreductase                                                                     |
| √ |       | VBIOchAnt73124_1235 | Oant_1182 | 3-oxoacyl-[acyl-carrier protein] reductase                                         |
| √ | √ √ √ | VBIOchAnt73124_1238 | Oant_1185 | Fructose-bisphosphate aldolase class I                                             |
| √ | √ √   | VBIOchAnt73124_1239 | Oant_1186 | PQQ-dependent oxidoreductase, gdhB family                                          |
| √ | √     | VBIOchAnt73124_1241 | Oant_1188 | conserved hypothetical protein                                                     |
| √ |       | VBIOchAnt73124_1246 | Oant_1193 | hypothetical protein                                                               |
| √ | √     | VBIOchAnt73124_1306 | Oant_1247 | hypothetical protein                                                               |
| √ |       | VBIOchAnt73124_1313 |           | hypothetical protein                                                               |
| √ | √ √ √ | VBIOchAnt73124_1321 | Oant_1260 | HYPOTHETICAL SIGNAL PEPTIDE PROTEIN                                                |
| √ | √ √   | VBIOchAnt73124_1322 | Oant_1261 | hypothetical protein                                                               |
| √ | √ √   | VBIOchAnt73124_1339 | Oant_1278 | Aldo/keto reductase                                                                |
| √ | √ √   | VBIOchAnt73124_1340 | Oant_1279 | polysaccharide deacetylase                                                         |
| √ |       | VBIOchAnt73124_1343 | Oant_1281 | Cyanate transport protein CynX                                                     |
| √ |       | VBIOchAnt73124_1344 | Oant_1282 | Probable deaminase                                                                 |

|   |   |   |                     |           |                                                                                              |
|---|---|---|---------------------|-----------|----------------------------------------------------------------------------------------------|
| √ | √ | √ | VBIOchAnt73124_1345 | Oant_1283 | Ankyrin                                                                                      |
| √ | √ | √ | VBIOchAnt73124_1346 | Oant_1284 | Transcriptional regulator, LysR family                                                       |
| √ | √ | √ | VBIOchAnt73124_1373 | Oant_1313 | GCN5-related N-acetyltransferase                                                             |
| √ | √ | √ | VBIOchAnt73124_1375 | Oant_1315 | hypothetical protein                                                                         |
| √ |   |   | VBIOchAnt73124_1400 | Oant_1335 | Bicyclomycin resistance protein                                                              |
| √ |   |   | VBIOchAnt73124_1412 | Oant_1347 | Quinone oxidoreductase                                                                       |
| √ | √ |   | VBIOchAnt73124_1422 | Oant_1356 | protein of unknown function DUF817                                                           |
| √ | √ |   | VBIOchAnt73124_1425 | Oant_1359 | contains type I hydrophobic transmembrane region and ATP/GTP binding motif                   |
| √ | √ | √ | VBIOchAnt73124_1431 | Oant_1364 | hypothetical protein                                                                         |
| √ | √ |   | VBIOchAnt73124_1484 | Oant_1415 | Putative sugar ABC transport system, permease protein Yjff                                   |
| √ | √ |   | VBIOchAnt73124_1485 | Oant_1416 | Putative sugar ABC transport system, permease protein YtfT                                   |
| √ | √ |   | VBIOchAnt73124_1486 | Oant_1417 | Putative sugar ABC transport system, ATP-binding protein YtfR                                |
| √ | √ |   | VBIOchAnt73124_1487 | Oant_1418 | Putative sugar ABC transport system, periplasmic binding protein YtfQ precursor              |
| √ |   |   | VBIOchAnt73124_1533 |           | hypothetical protein                                                                         |
| √ | √ | √ | VBIOchAnt73124_1534 | Oant_1463 | ABC transporter, substrate binding protein                                                   |
| √ | √ | √ | VBIOchAnt73124_1535 | Oant_1464 | Ferric iron ABC transporter, permease protein                                                |
| √ | √ | √ | VBIOchAnt73124_1536 | Oant_1465 | Putrescine transport ATP-binding protein PotA (TC 3.A.1.11.1)                                |
| √ | √ |   | VBIOchAnt73124_1543 | Oant_1472 | hypothetical protein                                                                         |
| √ | √ |   | VBIOchAnt73124_1544 | Oant_1473 | Beta-mannosidase                                                                             |
| √ | √ |   | VBIOchAnt73124_1545 | Oant_1474 | hypothetical protein                                                                         |
| √ | √ |   | VBIOchAnt73124_1546 | Oant_1475 | Archaeal seryl-tRNA synthetase-related sequence                                              |
| √ | √ |   | VBIOchAnt73124_1547 | Oant_1476 | Acyl-CoA dehydrogenase                                                                       |
| √ | √ |   | VBIOchAnt73124_1548 | Oant_1477 | Acyl carrier protein                                                                         |
| √ | √ |   | VBIOchAnt73124_1550 | Oant_1479 | hypothetical protein                                                                         |
| √ | √ |   | VBIOchAnt73124_1551 | Oant_1480 | hypothetical protein                                                                         |
| √ | √ |   | VBIOchAnt73124_1555 | Oant_1484 | hypothetical protein                                                                         |
| √ |   |   | VBIOchAnt73124_1562 | Oant_1492 | hypothetical protein                                                                         |
| √ |   |   | VBIOchAnt73124_1563 | Oant_1493 | hypothetical protein                                                                         |
| √ |   |   | VBIOchAnt73124_1566 | Oant_1496 | conserved hypothetical protein                                                               |
| √ |   |   | VBIOchAnt73124_1567 | Oant_1497 | hypothetical protein                                                                         |
| √ |   |   | VBIOchAnt73124_1568 | Oant_1498 | Baseplate assembly protein J                                                                 |
| √ | √ |   | VBIOchAnt73124_1571 | Oant_1500 | Phage-related baseplate assembly protein V                                                   |
| √ | √ |   | VBIOchAnt73124_1593 | Oant_1519 | hypothetical protein                                                                         |
| √ |   |   | VBIOchAnt73124_1604 |           | hypothetical protein                                                                         |
| √ |   |   | VBIOchAnt73124_1649 | Oant_1566 | PhnB protein; putative DNA binding 3-demethylubiquinone-9 3-methyltransferase domain protein |
| √ | √ | √ | VBIOchAnt73124_1650 | Oant_1567 | Putative transport protein                                                                   |
| √ | √ |   | VBIOchAnt73124_1654 | Oant_1570 | response regulator receiver domain protein                                                   |
| √ |   |   | VBIOchAnt73124_1665 |           | Signal transduction histidine kinase                                                         |

|   |   |                     |                     |                                                                             |                                                                                           |                                                                 |
|---|---|---------------------|---------------------|-----------------------------------------------------------------------------|-------------------------------------------------------------------------------------------|-----------------------------------------------------------------|
| √ |   | VBIOchAnt73124_1677 | Oant_1592           | LysR family transcriptional regulator STM2281                               |                                                                                           |                                                                 |
| √ | √ | VBIOchAnt73124_1678 | Oant_1593           | hypothetical protein                                                        |                                                                                           |                                                                 |
| √ | √ | √                   | VBIOchAnt73124_1701 | Oant_1614                                                                   | hypothetical protein                                                                      |                                                                 |
| √ | √ | VBIOchAnt73124_1721 | Oant_1633           | Chromate transport protein ChrA                                             |                                                                                           |                                                                 |
| √ | √ | √                   | VBIOchAnt73124_1734 | Oant_1646                                                                   | Branched-chain amino acid aminotransferase                                                |                                                                 |
| √ |   | VBIOchAnt73124_1761 |                     | hypothetical protein                                                        |                                                                                           |                                                                 |
| √ | √ | VBIOchAnt73124_1766 | Oant_1675           | Integral membrane protein                                                   |                                                                                           |                                                                 |
| √ |   | VBIOchAnt73124_1782 | Oant_1690           | conserved hypothetical protein                                              |                                                                                           |                                                                 |
| √ | √ | VBIOchAnt73124_1791 | Oant_1698           | UPF0337 protein RB0906                                                      |                                                                                           |                                                                 |
| √ |   | VBIOchAnt73124_1795 | Oant_1701           | hypothetical protein                                                        |                                                                                           |                                                                 |
| √ |   | VBIOchAnt73124_1803 | Oant_1708           | probable membrane protein YPO0899                                           |                                                                                           |                                                                 |
| √ | √ | √                   | VBIOchAnt73124_1825 | Oant_1727                                                                   | Mlr1575 protein                                                                           |                                                                 |
| √ | √ | √                   | VBIOchAnt73124_1826 | Oant_1728                                                                   | S-adenosylmethionine:diacylglycerol 3-amino-3-carboxypropyl transferase                   |                                                                 |
| √ |   | VBIOchAnt73124_1827 | Oant_1756           | hypothetical protein                                                        |                                                                                           |                                                                 |
| √ | √ | √                   | VBIOchAnt73124_1857 |                                                                             | conserved hypothetical protein                                                            |                                                                 |
| √ | √ | √                   | VBIOchAnt73124_1858 | Oant_1757                                                                   | hypothetical protein                                                                      |                                                                 |
| √ | √ | √                   | VBIOchAnt73124_1900 | Oant_1799                                                                   | Acetyltransferase                                                                         |                                                                 |
| √ | √ | VBIOchAnt73124_1903 | Oant_1802           | FOG: GGDEF domain                                                           |                                                                                           |                                                                 |
| √ | √ | √                   | VBIOchAnt73124_1904 | Oant_1803                                                                   | Nucleotidyltransferase                                                                    |                                                                 |
| √ | √ | √                   | VBIOchAnt73124_1936 | Oant_1835                                                                   | conserved hypothetical protein                                                            |                                                                 |
| √ |   | VBIOchAnt73124_1937 |                     | hypothetical protein                                                        |                                                                                           |                                                                 |
| √ | √ | VBIOchAnt73124_1938 | Oant_1836           | Phosphonate monoester hydrolase                                             |                                                                                           |                                                                 |
| √ | √ | √                   | VBIOchAnt73124_1939 | Oant_1837                                                                   | cell processes; transport of small molecules; amino acids, amines, peptides               |                                                                 |
| √ | √ | VBIOchAnt73124_1942 | Oant_1840           | cell processes; transport of small molecules; amino acids, amines, peptides |                                                                                           |                                                                 |
| √ | √ | √                   | VBIOchAnt73124_1943 | Oant_1841                                                                   | cell processes; transport of small molecules; amino acids, amines, peptides               |                                                                 |
| √ |   | VBIOchAnt73124_1969 | Oant_1869           | glycosyl transferase family 39                                              |                                                                                           |                                                                 |
| √ | √ | VBIOchAnt73124_1983 | Oant_1883           | probable major facilitator superfamily (MFS) transporter                    |                                                                                           |                                                                 |
| √ | √ | VBIOchAnt73124_1984 | Oant_1884           | Transcriptional regulator, TetR family                                      |                                                                                           |                                                                 |
| √ | √ | VBIOchAnt73124_2001 | Oant_1901           | iron-chelator utilization protein                                           |                                                                                           |                                                                 |
| √ | √ | √                   | VBIOchAnt73124_2002 | Oant_1902                                                                   | Dipeptide transport ATP-binding protein DppF (TC 3.A.1.5.2)                               |                                                                 |
| √ | √ | √                   | √                   | VBIOchAnt73124_2003                                                         | Oant_1903                                                                                 | Dipeptide transport ATP-binding protein DppD (TC 3.A.1.5.2)     |
| √ | √ | √                   | √                   | VBIOchAnt73124_2005                                                         | Oant_1905                                                                                 | Dipeptide transport system permease protein DppB (TC 3.A.1.5.2) |
|   |   |                     |                     |                                                                             | Dipeptide-binding ABC transporter, periplasmic substrate-binding component (TC 3.A.1.5.2) |                                                                 |
| √ | √ | √                   | VBIOchAnt73124_2006 | Oant_1906                                                                   |                                                                                           |                                                                 |
| √ | √ | VBIOchAnt73124_2007 | Oant_1907           | Microsomal dipeptidase                                                      |                                                                                           |                                                                 |
| √ | √ | √                   | VBIOchAnt73124_2019 | Oant_1918                                                                   | ATP-binding protein of ABC transporter                                                    |                                                                 |
| √ |   | VBIOchAnt73124_2030 | Oant_1929           | hypothetical protein                                                        |                                                                                           |                                                                 |
| √ | √ | √                   | VBIOchAnt73124_2033 | Oant_1932                                                                   | hypothetical protein                                                                      |                                                                 |
| √ | √ | √                   | VBIOchAnt73124_2037 | Oant_1935                                                                   | hypothetical protein                                                                      |                                                                 |

|   |   |   |                     |           |                                                                                           |
|---|---|---|---------------------|-----------|-------------------------------------------------------------------------------------------|
| √ | √ | √ | VBIOchAnt73124_2093 | Oant_1991 | Glutathione S-transferase                                                                 |
| √ | √ | √ | VBIOchAnt73124_2099 | Oant_1997 | Oxidoreductase, aldo/keto reductase family                                                |
| √ | √ |   | VBIOchAnt73124_2100 | Oant_1998 | hypothetical protein                                                                      |
| √ | √ | √ | VBIOchAnt73124_2101 | Oant_1999 | protein of unknown function DUF1452                                                       |
| √ | √ | √ | VBIOchAnt73124_2112 | Oant_2009 | hypothetical protein                                                                      |
| √ |   | √ | VBIOchAnt73124_2127 | Oant_2023 | hypothetical protein                                                                      |
| √ | √ |   | VBIOchAnt73124_2163 | Oant_2057 | RNA signal recognition particle 4.5S RNA                                                  |
| √ | √ |   | VBIOchAnt73124_2179 | Oant_2073 | hypothetical protein                                                                      |
| √ | √ |   | VBIOchAnt73124_2180 | Oant_2074 | Transcription regulator [contains diacylglycerol kinase catalytic domain]                 |
| √ | √ | √ | VBIOchAnt73124_2206 | Oant_2101 | 3-oxoacyl-[acyl-carrier protein] reductase                                                |
| √ | √ | √ | VBIOchAnt73124_2207 | Oant_2102 | Citrate synthase (si)                                                                     |
| √ | √ | √ | VBIOchAnt73124_2208 | Oant_2103 | Citrate synthase (si)                                                                     |
| √ | √ | √ | VBIOchAnt73124_2209 | Oant_2104 | Ser/Thr protein phosphatase family protein, UDP-2,3-diacetylglucosamine hydrolase homolog |
| √ | √ | √ | VBIOchAnt73124_2210 | Oant_2105 | Glycosyltransferase                                                                       |
| √ |   | √ | VBIOchAnt73124_2233 | Oant_2126 | Probable transmembrane protein                                                            |
| √ | √ |   | VBIOchAnt73124_2234 | Oant_2127 | putative oxidoreductase                                                                   |
| √ | √ | √ | VBIOchAnt73124_2253 | Oant_2145 | hypothetical protein                                                                      |
| √ | √ | √ | VBIOchAnt73124_2294 | Oant_2184 | Phosphonate ABC transporter permease protein phnE1 (TC 3.A.1.9.1)                         |
| √ | √ | √ | VBIOchAnt73124_2295 | Oant_2185 | Phosphonate ABC transporter permease protein phnE2 (TC 3.A.1.9.1)                         |
| √ | √ | √ | VBIOchAnt73124_2296 | Oant_2186 | Phosphonate ABC transporter phosphate-binding periplasmic component (TC 3.A.1.9.1)        |
| √ | √ | √ | VBIOchAnt73124_2297 | Oant_2187 | Phosphonate ABC transporter ATP-binding protein (TC 3.A.1.9.1)                            |
| √ | √ | √ | VBIOchAnt73124_2301 | Oant_2191 | Phosphonates transport ATP-binding protein PhnL                                           |
| √ | √ | √ | VBIOchAnt73124_2302 | Oant_2192 | Phosphonates transport ATP-binding protein PhnK                                           |
| √ | √ | √ | VBIOchAnt73124_2303 | Oant_2193 | PhnJ protein                                                                              |
| √ | √ | √ | VBIOchAnt73124_2304 | Oant_2194 | PhnI protein                                                                              |
| √ | √ | √ | VBIOchAnt73124_2305 | Oant_2195 | PhnH protein                                                                              |
| √ | √ | √ | VBIOchAnt73124_2306 | Oant_2196 | PhnG protein                                                                              |
| √ | √ | √ | VBIOchAnt73124_2328 | Oant_2217 | ATP-binding protein of ABC transporter                                                    |
| √ |   |   | VBIOchAnt73124_2329 | Oant_2218 | Lipoate-protein ligase A                                                                  |
| √ | √ |   | VBIOchAnt73124_2332 | Oant_2219 | hypothetical protein                                                                      |
| √ |   |   | VBIOchAnt73124_2335 | Oant_2221 | ATP/GTP-binding site motif A (P-loop) :Porin, alpha proteobacteria type                   |
| √ |   | √ | VBIOchAnt73124_2338 | Oant_2223 | hypothetical protein                                                                      |
| √ | √ | √ | VBIOchAnt73124_2347 | Oant_2232 | protein of unknown function DUF6 transmembrane                                            |
| √ | √ | √ | VBIOchAnt73124_2382 | Oant_2264 | Membrane proteins related to metalloendopeptidases                                        |
| √ |   |   | VBIOchAnt73124_2459 | Oant_2329 | Site-specific recombinase, phage integrase family                                         |
| √ |   |   | VBIOchAnt73124_2518 | Oant_2387 | hypothetical protein                                                                      |
| √ | √ | √ | VBIOchAnt73124_2519 | Oant_2388 | Transcriptional regulator, GntR family domain / Aspartate aminotransferase                |
| √ | √ | √ | VBIOchAnt73124_2530 | Oant_2400 | Transcriptional regulator, HxIR family                                                    |

|   |   |   |                     |           |                                                                           |
|---|---|---|---------------------|-----------|---------------------------------------------------------------------------|
| √ | √ | √ | VBIOchAnt73124_2531 | Oant_2401 | Rrf2-linked NADH-flavin reductase                                         |
| √ | √ | √ | VBIOchAnt73124_2553 | Oant_2421 | Gfa-like protein                                                          |
| √ |   |   | VBIOchAnt73124_2557 | Oant_2425 | MII0159 protein                                                           |
| √ | √ | √ | VBIOchAnt73124_2560 | Oant_2426 | Transcriptional regulator, TetR family                                    |
| √ | √ |   | VBIOchAnt73124_2561 | Oant_2427 | Probable glutathione S-transferase-related transmembrane protein          |
| √ |   |   | VBIOchAnt73124_2566 | Oant_2431 | Proteinase inhibitor I11, ecotin precursor                                |
| √ | √ |   | VBIOchAnt73124_2570 | Oant_2435 | hypothetical protein                                                      |
| √ |   |   | VBIOchAnt73124_2572 | Oant_2437 | D-beta-hydroxybutyrate permease                                           |
| √ | √ |   | VBIOchAnt73124_2582 | Oant_2448 | lipoprotein, putative                                                     |
| √ | √ |   | VBIOchAnt73124_2583 | Oant_2449 | hypothetical protein                                                      |
| √ |   |   | VBIOchAnt73124_2584 | Oant_2450 | Prolidase                                                                 |
| √ | √ | √ | VBIOchAnt73124_2585 | Oant_2452 | Lipopolysaccharide biosynthesis protein-like protein                      |
| √ | √ |   | VBIOchAnt73124_2609 | Oant_2477 | Ribokinase                                                                |
| √ | √ |   | VBIOchAnt73124_2612 | Oant_2481 | SN-glycerol-3-phosphate transport ATP-binding protein UgpC (TC 3.A.1.1.3) |
| √ | √ |   | VBIOchAnt73124_2613 | Oant_2482 | Argininosuccinate lyase                                                   |
| √ | √ | √ | VBIOchAnt73124_2614 | Oant_2483 | N-Acetyl-D-glucosamine ABC transport system, permease protein 2           |
| √ | √ |   | VBIOchAnt73124_2615 | Oant_2484 | N-Acetyl-D-glucosamine ABC transport system, permease protein 1           |
| √ | √ |   | VBIOchAnt73124_2616 | Oant_2485 | hypothetical protein                                                      |
| √ | √ |   | VBIOchAnt73124_2620 | Oant_2487 | hypothetical protein                                                      |
| √ |   |   | VBIOchAnt73124_2621 | Oant_2488 | hypothetical protein                                                      |
| √ | √ | √ | VBIOchAnt73124_2622 | Oant_2489 | Flp pilus assembly protein, pilin Flp                                     |
| √ | √ | √ | VBIOchAnt73124_2624 | Oant_2491 | protein                                                                   |
| √ | √ | √ | VBIOchAnt73124_2626 | Oant_2493 | Succinyl-CoA synthetase, alpha subunit-related enzymes                    |
| √ |   |   | VBIOchAnt73124_2630 | Oant_2497 | Outer membrane lipoprotein e (P4) / NMN 5'-nucleotidase, extracellular    |
| √ |   |   | VBIOchAnt73124_2631 | Oant_2498 | hypothetical protein                                                      |
| √ | √ | √ | VBIOchAnt73124_2634 | Oant_2501 | hypothetical protein                                                      |
| √ | √ | √ | VBIOchAnt73124_2637 | Oant_2504 | hypothetical protein                                                      |
| √ | √ | √ | VBIOchAnt73124_2640 | Oant_2507 | Glycosyltransferase                                                       |
| √ |   |   | VBIOchAnt73124_2642 |           | hypothetical protein                                                      |
| √ | √ | √ | VBIOchAnt73124_2644 | Oant_2510 | hypothetical protein                                                      |
| √ | √ | √ | VBIOchAnt73124_2645 | Oant_2511 | Protein of unknown function UPF0060                                       |
| √ | √ |   | VBIOchAnt73124_2646 | Oant_2512 | 3-oxoacyl-[acyl-carrier protein] reductase                                |
| √ | √ | √ | VBIOchAnt73124_2647 | Oant_2513 | Metallo-beta-lactamase family protein                                     |
| √ |   |   | VBIOchAnt73124_2648 | Oant_2514 | ATP synthase A chain                                                      |
| √ |   |   | VBIOchAnt73124_2667 | Oant_2533 | CopG protein                                                              |
| √ | √ | √ | VBIOchAnt73124_2682 | Oant_2547 | DNA-binding protein                                                       |
| √ | √ | √ | VBIOchAnt73124_2683 | Oant_2548 | Glyoxalase family protein                                                 |
| √ | √ |   | VBIOchAnt73124_2684 | Oant_2549 | putative transcriptional regulator                                        |
| √ | √ |   | VBIOchAnt73124_2685 | Oant_2550 | conserved hypothetical protein                                            |

|   |   |                     |           |                                                                                            |
|---|---|---------------------|-----------|--------------------------------------------------------------------------------------------|
| √ | √ | VBIOchAnt73124_2686 | Oant_2551 | Transcriptional regulator, ArsR family                                                     |
| √ | √ | VBIOchAnt73124_2687 | Oant_2552 | GCN5-related N-acetyltransferase                                                           |
| √ | √ | VBIOchAnt73124_2697 | Oant_2560 | hypothetical protein                                                                       |
| √ |   | VBIOchAnt73124_2698 | Oant_2561 | extracellular solute-binding protein, family 3                                             |
| √ | √ | VBIOchAnt73124_2707 | Oant_2570 | hypothetical protein                                                                       |
| √ | √ | VBIOchAnt73124_2724 | Oant_2585 | Beta-lactamase                                                                             |
| √ | √ | VBIOchAnt73124_2725 | Oant_2586 | HTH-type transcriptional activator ampR                                                    |
| √ |   | VBIOchAnt73124_2738 | Oant_2597 | hypothetical protein                                                                       |
| √ | √ | VBIOchAnt73124_2752 | Oant_2610 | Gfa-like protein                                                                           |
| √ | √ | VBIOchAnt73124_2760 | Oant_2618 | Transcriptional regulator, AraC family                                                     |
| √ | √ | VBIOchAnt73124_2761 | Oant_2619 | probable hydrolase                                                                         |
| √ | √ | VBIOchAnt73124_2762 | Oant_2620 | uncharacterized conserved protein, Ycil family                                             |
| √ |   | VBIOchAnt73124_2789 |           | hypothetical protein                                                                       |
| √ |   | VBIOchAnt73124_2795 |           | hypothetical protein                                                                       |
| √ | √ | VBIOchAnt73124_2839 | Oant_2693 | Long-chain-fatty-acid--CoA ligase                                                          |
| √ | √ | VBIOchAnt73124_2841 | Oant_2695 | cytochrome c556                                                                            |
| √ | √ | VBIOchAnt73124_2842 | Oant_2696 | Putative diheme cytochrome c-553                                                           |
| √ | √ | VBIOchAnt73124_2862 | Oant_2713 | Alpha,alpha-trehalose-phosphate synthase [UDP-forming]                                     |
| √ | √ | VBIOchAnt73124_2863 | Oant_2714 | Trehalose-6-phosphate phosphatase                                                          |
| √ |   | VBIOchAnt73124_2872 | Oant_2724 | transposase IS3/IS911 family protein                                                       |
| √ |   | VBIOchAnt73124_2900 | Oant_2761 | Inosine-uridine preferring nucleoside hydrolase                                            |
| √ | √ | VBIOchAnt73124_2907 | Oant_2768 | hypothetical protein                                                                       |
| √ |   | VBIOchAnt73124_2908 | Oant_2769 | Oligopeptide ABC transporter, periplasmic oligopeptide-binding protein OppA (TC 3.A.1.5.1) |
| √ |   | VBIOchAnt73124_2909 | Oant_2770 | binding-protein-dependent transport systems inner membrane component                       |
| √ |   | VBIOchAnt73124_2910 | Oant_2771 | binding-protein-dependent transport systems inner membrane component                       |
| √ |   | VBIOchAnt73124_2911 | Oant_2772 | ABC transporter, ATP-binding protein                                                       |
| √ |   | VBIOchAnt73124_2912 | Oant_2773 | ABC transporter related                                                                    |
| √ | √ | VBIOchAnt73124_2916 | Oant_2777 | hypothetical protein                                                                       |
| √ | √ | VBIOchAnt73124_2917 | Oant_2778 | Ferric hydroxamate ABC transporter (TC 3.A.1.14.3), permease component FhuB                |
| √ | √ | VBIOchAnt73124_2918 | Oant_2779 | transcriptional regulator, LysR family                                                     |
| √ |   | VBIOchAnt73124_2919 | Oant_2780 | hypothetical protein                                                                       |
| √ | √ | VBIOchAnt73124_2921 | Oant_2781 | ABC transporter, substrate binding protein                                                 |
| √ | √ | VBIOchAnt73124_2922 | Oant_2782 | ABC transporter, permease protein                                                          |
| √ | √ | VBIOchAnt73124_2923 | Oant_2783 | Dipeptide transport system permease protein DppC (TC 3.A.1.5.2)                            |
| √ | √ | VBIOchAnt73124_2924 | Oant_2784 | Alpha-glucoside transport ATP-binding protein AgIK                                         |
| √ | √ | VBIOchAnt73124_2925 | Oant_2785 | MII5128 protein                                                                            |
| √ | √ | VBIOchAnt73124_2926 | Oant_2786 | Alkaline phosphatase                                                                       |
| √ | √ | VBIOchAnt73124_2942 | Oant_2800 | Lysine-arginine-ornithine-binding periplasmic protein precursor (TC 3.A.1.3.1)             |

|   |   |                     |           |                                                                                     |
|---|---|---------------------|-----------|-------------------------------------------------------------------------------------|
| √ |   | VBIOchAnt73124_2949 | Oant_2807 | Ribose ABC transport system, periplasmic ribose-binding protein RbsB (TC 3.A.1.2.1) |
| √ |   | VBIOchAnt73124_2950 | Oant_2808 | Ribose ABC transport system, ATP-binding protein RbsA (TC 3.A.1.2.1)                |
| √ |   | VBIOchAnt73124_2951 | Oant_2809 | Ribose ABC transport system, permease protein RbsC (TC 3.A.1.2.1)                   |
| √ | √ | VBIOchAnt73124_2960 | Oant_2818 | Oxidoreductase-related protein                                                      |
| √ |   | VBIOchAnt73124_2967 | Oant_2825 | ABC-type Fe3+-siderophore transport system, permease 2 component                    |
| √ | √ | VBIOchAnt73124_2968 | Oant_2826 | ABC-type Fe3+-siderophore transport system, permease component                      |
| √ | √ | VBIOchAnt73124_2969 | Oant_2827 | putative lipoprotein                                                                |
| √ |   | VBIOchAnt73124_2973 |           | Ferrichrome-iron receptor                                                           |
| √ | √ | VBIOchAnt73124_2974 | Oant_2830 | Transcriptional regulator, AraC family                                              |
| √ | √ | VBIOchAnt73124_2975 | Oant_2831 | hypothetical protein                                                                |
| √ |   | VBIOchAnt73124_2976 | Oant_2832 | Ferric iron ABC transporter, permease protein                                       |
| √ |   | VBIOchAnt73124_2977 | Oant_2833 | Ferric iron ABC transporter, iron-binding protein                                   |
| √ |   | VBIOchAnt73124_2978 | Oant_2834 | ABC transporter related                                                             |
| √ |   | VBIOchAnt73124_2979 | Oant_2835 | Lipoprotein Blc                                                                     |
| √ | √ | VBIOchAnt73124_2980 | Oant_2836 | Aldehyde dehydrogenase                                                              |
| √ | √ | VBIOchAnt73124_2981 | Oant_2837 | Deoxyribose-phosphate aldolase                                                      |
| √ | √ | VBIOchAnt73124_2983 | Oant_2839 | Putative uncharacterized protein STY3991                                            |
| √ | √ | VBIOchAnt73124_2984 | Oant_2840 | Ribose ABC transport system, permease protein RbsC (TC 3.A.1.2.1)                   |
| √ | √ | VBIOchAnt73124_2985 | Oant_2841 | Ribose ABC transport system, permease protein RbsC (TC 3.A.1.2.1)                   |
| √ | √ | VBIOchAnt73124_2986 | Oant_2842 | Ribose ABC transport system, ATP-binding protein RbsA (TC 3.A.1.2.1)                |
| √ | √ | VBIOchAnt73124_2987 | Oant_2843 | Ribose ABC transport system, periplasmic ribose-binding protein RbsB (TC 3.A.1.2.1) |
| √ | √ | VBIOchAnt73124_2988 | Oant_2844 | Deoxyribose operon repressor, DeoR family                                           |
| √ | √ | VBIOchAnt73124_2989 | Oant_2845 | Transcriptional regulator, TetR family                                              |
| √ | √ | VBIOchAnt73124_2990 | Oant_2846 | ABC transporter, permease protein                                                   |
| √ |   | VBIOchAnt73124_2991 | Oant_2847 | Transcriptional regulator, LysR family                                              |
| √ |   | VBIOchAnt73124_2992 | Oant_2848 | Amino acid ABC transporter, periplasmic amino acid-binding protein                  |
| √ |   | VBIOchAnt73124_2993 | Oant_2849 | Putative transport system permease protein                                          |
| √ |   | VBIOchAnt73124_2995 | Oant_2851 | Glutamate transport ATP-binding protein                                             |
| √ | √ | VBIOchAnt73124_2997 | Oant_2853 | Adenosylmethionine-8-amino-7-oxononanoate aminotransferase                          |
| √ | √ | VBIOchAnt73124_2998 | Oant_2854 | hypothetical protein                                                                |
| √ | √ | VBIOchAnt73124_2999 | Oant_2855 | GCN5-related N-acetyltransferase                                                    |
| √ | √ | VBIOchAnt73124_3000 | Oant_2856 | Acetylpolyamine aminohydrolase                                                      |
| √ |   | VBIOchAnt73124_3002 | Oant_2857 | thioesterase superfamily protein                                                    |
| √ |   | VBIOchAnt73124_3005 | Oant_2860 | Selenide,water dikinase                                                             |
| √ |   | VBIOchAnt73124_3006 | Oant_2861 | transglutaminase domain protein                                                     |
| √ |   | VBIOchAnt73124_3008 | Oant_2863 | Formate dehydrogenase O alpha subunit @ selenocysteine-containing                   |
| √ |   | VBIOchAnt73124_3009 | Oant_2864 | Formate dehydrogenase O beta subunit                                                |
| √ |   | VBIOchAnt73124_3010 | Oant_2865 | Formate dehydrogenase O gamma subunit                                               |
| √ | √ | VBIOchAnt73124_3011 | Oant_2866 | formate dehydrogenase formation protein FdhE                                        |

|   |     |                     |           |                                                                                           |
|---|-----|---------------------|-----------|-------------------------------------------------------------------------------------------|
| √ |     | VBIOchAnt73124_3012 | Oant_2867 | L-seryl-tRNA(Sec) selenium transferase                                                    |
| √ | √   | VBIOchAnt73124_3013 | Oant_2868 | hypothetical protein                                                                      |
| √ |     | VBIOchAnt73124_3014 | Oant_2869 | Selenocysteine-specific translation elongation factor                                     |
| √ |     | VBIOchAnt73124_3018 | Oant_2873 | response regulator receiver protein                                                       |
| √ |     | VBIOchAnt73124_3019 | Oant_2874 | two-component sensor histidine kinase                                                     |
| √ |     | VBIOchAnt73124_3020 | Oant_2875 | hypothetical protein                                                                      |
| √ | √ √ | VBIOchAnt73124_3021 | Oant_2876 | putative autotransporter protein                                                          |
| √ |     | VBIOchAnt73124_3022 |           | hypothetical protein                                                                      |
| √ | √ √ | VBIOchAnt73124_3025 | Oant_2879 | Esterase/lipase                                                                           |
| √ | √   | VBIOchAnt73124_3026 | Oant_2880 | Transcriptional regulator, LysR family                                                    |
| √ |     | VBIOchAnt73124_3027 | Oant_2881 | hypothetical protein                                                                      |
| √ |     | VBIOchAnt73124_3028 | Oant_2882 | CDP-diacylglycerol--glycerol-3-phosphate 3-phosphatidyltransferase                        |
| √ |     | VBIOchAnt73124_3029 | Oant_2883 | Putative lipase in cluster with Phosphatidate cytidyltransferase                          |
| √ |     | VBIOchAnt73124_3030 | Oant_2884 | Ser/Thr and Tyr protein phosphatase (dual specificity)                                    |
| √ |     | VBIOchAnt73124_3031 | Oant_2885 | hypothetical protein                                                                      |
| √ |     | VBIOchAnt73124_3032 | Oant_2886 | 1-acyl-sn-glycerol-3-phosphate acyltransferase                                            |
| √ |     | VBIOchAnt73124_3033 | Oant_2887 | Phosphatidate cytidyltransferase                                                          |
| √ | √ √ | VBIOchAnt73124_3034 | Oant_2888 | hypothetical protein                                                                      |
| √ |     | VBIOchAnt73124_3049 | Oant_2902 | Transketolase                                                                             |
| √ | √   | VBIOchAnt73124_3065 | Oant_2917 | Erythritol kinase EryA                                                                    |
| √ | √   | VBIOchAnt73124_3066 | Oant_2918 | Glycerol-3-phosphate dehydrogenase                                                        |
| √ |     | VBIOchAnt73124_3068 | Oant_2920 | L-proline glycine betaine binding ABC transporter protein ProX (TC 3.A.1.12.1)            |
| √ | √   | VBIOchAnt73124_3069 | Oant_2921 | transcription regulator                                                                   |
| √ | √ √ | VBIOchAnt73124_3070 | Oant_2922 | hypothetical protein                                                                      |
| √ | √ √ | VBIOchAnt73124_3071 | Oant_2923 | 3-hydroxyacyl-CoA dehydrogenase                                                           |
| √ | √ √ | VBIOchAnt73124_3076 | Oant_2928 | Putative drug efflux protein                                                              |
| √ | √ √ | VBIOchAnt73124_3078 | Oant_2930 | Transcriptional regulator, LysR family                                                    |
| √ |     | VBIOchAnt73124_3082 | Oant_2934 | putative methylisocitrate lyase                                                           |
| √ |     | VBIOchAnt73124_3085 | Oant_2937 | Transcriptional regulator, GntR family                                                    |
| √ | √   | VBIOchAnt73124_3086 | Oant_2938 | Cobalt-zinc-cadmium resistance protein                                                    |
| √ |     | VBIOchAnt73124_3094 | Oant_2946 | hypothetical protein                                                                      |
| √ | √   | VBIOchAnt73124_3095 | Oant_2947 | Alcohol dehydrogenase                                                                     |
| √ | √   | VBIOchAnt73124_3097 | Oant_2949 | hypothetical protein                                                                      |
| √ | √ √ | VBIOchAnt73124_3098 | Oant_2950 | Redox-sensitive transcriptional activator SoxR                                            |
| √ |     | VBIOchAnt73124_3099 | Oant_2951 | short-chain dehydrogenase/reductase SDR                                                   |
| √ |     | VBIOchAnt73124_3106 | Oant_2956 | Deblocking aminopeptidase @ Cyanophycinase 2                                              |
| √ | √   | VBIOchAnt73124_3107 | Oant_2957 | Dipeptide-binding ABC transporter, periplasmic substrate-binding component (TC 3.A.1.5.2) |
| √ |     | VBIOchAnt73124_3109 | Oant_2959 | Probable oligopeptide ABC transporter, ATP-binding protein                                |

|   |     |                     |           |                                                                                                |
|---|-----|---------------------|-----------|------------------------------------------------------------------------------------------------|
| √ |     | VBIOchAnt73124_3110 | Oant_2960 | Dipeptide transport ATP-binding protein DppF (TC 3.A.1.5.2)                                    |
| √ |     | VBIOchAnt73124_3111 | Oant_2961 | Transcriptional regulator, GntR family                                                         |
| √ | √   | VBIOchAnt73124_3112 | Oant_2962 | Asparagine synthetase [glutamine-hydrolyzing]                                                  |
| √ | √   | VBIOchAnt73124_3113 | Oant_2963 | Cyanophycin synthase                                                                           |
| √ | √   | VBIOchAnt73124_3125 | Oant_2974 | Transcriptional regulator, LysR family                                                         |
| √ |     | VBIOchAnt73124_3127 | Oant_2976 | 5-FCL-like protein                                                                             |
| √ |     | VBIOchAnt73124_3128 | Oant_2977 | putative ABC transporter, permease protein                                                     |
| √ |     | VBIOchAnt73124_3129 | Oant_2978 | Pyrimidine ABC transporter, ATP-binding protein                                                |
| √ |     | VBIOchAnt73124_3130 | Oant_2979 | Hydroxymethylpyrimidine ABC transporter, substrate-binding component                           |
| √ |     | VBIOchAnt73124_3131 | Oant_2980 | 5-FCL-like protein                                                                             |
| √ |     | VBIOchAnt73124_3132 | Oant_2981 | transcriptional regulator, RpiR family                                                         |
| √ | √   | VBIOchAnt73124_3133 | Oant_2982 | 2-polyprenyl-6-methoxyphenol hydroxylase and related FAD-dependent oxidoreductases             |
| √ | √ √ | VBIOchAnt73124_3136 | Oant_2985 | Binding-protein-dependent transport systems inner membrane component precursor                 |
| √ | √ √ | VBIOchAnt73124_3138 | Oant_2987 | Metallo-dependent hydrolases, subgroup B                                                       |
| √ | √ √ | VBIOchAnt73124_3139 | Oant_2988 | Putative translation initiation inhibitor, yjgF family                                         |
| √ | √ √ | VBIOchAnt73124_3141 | Oant_2990 | L-seryl-tRNA(Sec) selenium transferase-related protein                                         |
| √ | √ √ | VBIOchAnt73124_3142 | Oant_2991 | Putative glutathione transporter, ATP-binding component                                        |
| √ | √   | VBIOchAnt73124_3144 | Oant_2993 | Integral membrane protein TerC                                                                 |
| √ |     | VBIOchAnt73124_3148 | Oant_2997 | hypothetical protein                                                                           |
| √ | √ √ | VBIOchAnt73124_3157 | Oant_3006 | serine/threonine protein phosphatase                                                           |
| √ | √   | VBIOchAnt73124_3159 | Oant_3008 | hypothetical protein                                                                           |
| √ | √   | VBIOchAnt73124_3175 | Oant_3024 | NADPH-dependent FMN reductase                                                                  |
| √ | √   | VBIOchAnt73124_3176 | Oant_3025 | Transcriptional regulator, HxLR family                                                         |
| √ | √ √ | VBIOchAnt73124_3179 | Oant_3028 | hypothetical protein                                                                           |
| √ | √ √ | VBIOchAnt73124_3182 | Oant_3031 | hypothetical protein                                                                           |
| √ | √   | VBIOchAnt73124_3210 | Oant_3059 | hypothetical protein                                                                           |
| √ | √ √ | VBIOchAnt73124_3211 | Oant_3060 | putative GFO/IDH/MocA family oxidoreductase                                                    |
| √ | √   | VBIOchAnt73124_3214 | Oant_3063 | putative lipoprotein                                                                           |
| √ | √   | VBIOchAnt73124_3216 | Oant_3065 | Putative oxidoreductase                                                                        |
| √ | √   | VBIOchAnt73124_3218 | Oant_3067 | similar to ribulose-1,5-bisphosphate carboxylase, Type III                                     |
| √ | √   | VBIOchAnt73124_3219 | Oant_3068 | Transcriptional regulator, GntR family                                                         |
| √ | √   | VBIOchAnt73124_3231 | Oant_3080 | Cyclopropane-fatty-acyl-phospholipid synthase                                                  |
| √ |     | VBIOchAnt73124_3232 | Oant_3081 | hypothetical protein                                                                           |
| √ | √   | VBIOchAnt73124_3234 | Oant_3084 | Isoaspartyl aminopeptidase @ Asp-X dipeptidase                                                 |
| √ |     | VBIOchAnt73124_3235 | Oant_3085 | Proline iminopeptidase                                                                         |
| √ | √   | VBIOchAnt73124_3236 | Oant_3086 | prolyl oligopeptidase family protein                                                           |
| √ | √   | VBIOchAnt73124_3237 | Oant_3087 | Catalyzes the cleavage of p-aminobenzoyl-glutamate to p-aminobenzoate and glutamate, subunit B |
| √ | √   | VBIOchAnt73124_3238 | Oant_3088 | Dipeptide-binding ABC transporter, periplasmic substrate-binding component (TC 3.A.1.5.2)      |

|   |   |                     |           |                                                                                           |
|---|---|---------------------|-----------|-------------------------------------------------------------------------------------------|
| √ | √ | VBIOchAnt73124_3239 | Oant_3089 | Dipeptide transport system permease protein DppB (TC 3.A.1.5.2)                           |
| √ | √ | VBIOchAnt73124_3242 | Oant_3092 | Oligopeptide transport ATP-binding protein OppF (TC 3.A.1.5.1)                            |
| √ | √ | VBIOchAnt73124_3243 | Oant_3093 | Beta-lactamase class C and other penicillin binding proteins                              |
| √ | √ | VBIOchAnt73124_3244 | Oant_3094 | hypothetical protein                                                                      |
| √ |   | VBIOchAnt73124_3245 | Oant_3095 | Transcriptional regulator                                                                 |
| √ |   | VBIOchAnt73124_3246 | Oant_3096 | Transcriptional regulator associated with Tricarboxylic transport                         |
| √ |   | VBIOchAnt73124_3247 | Oant_3097 | 4-hydroxythreonine-4-phosphate dehydrogenase                                              |
| √ |   | VBIOchAnt73124_3248 | Oant_3098 | Tricarboxylate transport protein TctC                                                     |
| √ |   | VBIOchAnt73124_3249 | Oant_3099 | Tricarboxylate transport protein TctB                                                     |
| √ |   | VBIOchAnt73124_3250 | Oant_3100 | Tricarboxylate transport membrane protein TctA                                            |
| √ |   | VBIOchAnt73124_3251 | Oant_3101 | hypothetical protein                                                                      |
| √ | √ | VBIOchAnt73124_3252 | Oant_3102 | Dihydroxyacetone kinase, ATP-dependent                                                    |
| √ |   | VBIOchAnt73124_3253 | Oant_3103 | hypothetical protein                                                                      |
| √ |   | VBIOchAnt73124_3262 | Oant_3112 | periplasmic sensor signal transduction histidine kinase                                   |
| √ |   | VBIOchAnt73124_3263 | Oant_3113 | C4-dicarboxylate transport transcriptional regulatory protein                             |
| √ |   | VBIOchAnt73124_3271 | Oant_3121 | hypothetical protein                                                                      |
| √ | √ | VBIOchAnt73124_3272 | Oant_3122 | Sialic acid utilization regulator, RpiR family                                            |
| √ | √ | VBIOchAnt73124_3275 | Oant_3125 | N-acetylmuramic acid 6-phosphate etherase                                                 |
| √ | √ | VBIOchAnt73124_3276 | Oant_3126 | Dipeptide-binding ABC transporter, periplasmic substrate-binding component (TC 3.A.1.5.2) |
| √ | √ | VBIOchAnt73124_3278 | Oant_3128 | Dipeptide transport system permease protein DppC (TC 3.A.1.5.2)                           |
| √ | √ | VBIOchAnt73124_3279 | Oant_3129 | Oligopeptide transport ATP-binding protein OppD (TC 3.A.1.5.1)                            |
| √ | √ | VBIOchAnt73124_3280 | Oant_3130 | Beta-lactamase class C and other penicillin binding proteins                              |
| √ | √ | VBIOchAnt73124_3282 | Oant_3132 | hypothetical protein                                                                      |
| √ | √ | VBIOchAnt73124_3283 | Oant_3133 | diguanylate cyclase/phosphodiesterase (GGDEF & EAL domains) with PAS/PAC sensor(s)        |
| √ | √ | VBIOchAnt73124_3284 | Oant_3134 | Methyltransferase, FkbM family                                                            |
| √ | √ | VBIOchAnt73124_3293 | Oant_3144 | conserved hypothetical protein                                                            |
| √ | √ | VBIOchAnt73124_3312 | Oant_3160 | Mercuric ion reductase                                                                    |
| √ | √ | VBIOchAnt73124_3352 | Oant_3197 | Arsenic resistance protein ArsH                                                           |
| √ | √ | VBIOchAnt73124_3353 | Oant_3198 | Arsenical-resistance protein ACR3                                                         |
| √ | √ | VBIOchAnt73124_3356 | Oant_3201 | Transcriptional regulator, ArsR family                                                    |
| √ | √ | VBIOchAnt73124_3376 | Oant_3221 | Conjugative transfer protein TrbI                                                         |
| √ | √ | VBIOchAnt73124_3417 | Oant_3259 | AmpG permease                                                                             |
| √ |   | VBIOchAnt73124_3423 | Oant_3265 | cell processes; transport of small molecules; amino acids, amines, peptides               |
| √ |   | VBIOchAnt73124_3424 | Oant_3266 | Putative translation initiation inhibitor, yjgF family                                    |
| √ | √ | VBIOchAnt73124_3425 | Oant_3267 | drug resistance transporter, EmrB/QacA family                                             |
| √ | √ | VBIOchAnt73124_3453 | Oant_3298 | hypothetical protein                                                                      |
| √ | √ | VBIOchAnt73124_3461 | Oant_3306 | Uncharacterized ABC-type transport system, permease component                             |
| √ | √ | VBIOchAnt73124_3462 | Oant_3307 | Sugar ABC transporter, permease protein                                                   |

|   |   |                     |           |                                                                                |
|---|---|---------------------|-----------|--------------------------------------------------------------------------------|
| ✓ | ✓ | VBIOchAnt73124_3463 | Oant_3308 | Sugar ABC transporter, ATP-binding protein                                     |
| ✓ | ✓ | VBIOchAnt73124_3464 | Oant_3309 | hypothetical protein                                                           |
| ✓ | ✓ | VBIOchAnt73124_3465 | Oant_3310 | Bmp family protein                                                             |
| ✓ | ✓ | VBIOchAnt73124_3466 | Oant_3311 | Cytosine deaminase                                                             |
| ✓ | ✓ | VBIOchAnt73124_3468 | Oant_3313 | FOG: PAS/PAC domain                                                            |
| ✓ |   | VBIOchAnt73124_3469 | Oant_3314 | N-acetyl-L,L-diaminopimelate deacetylase                                       |
| ✓ |   | VBIOchAnt73124_3470 | Oant_3315 | L-2-amino-thiazoline-4-carboxylic acid hydrolase                               |
| ✓ | ✓ | VBIOchAnt73124_3471 | Oant_3316 | FAD dependent oxidoreductase                                                   |
| ✓ | ✓ | VBIOchAnt73124_3472 | Oant_3317 | Putative glutathione transporter, ATP-binding component                        |
| ✓ | ✓ | VBIOchAnt73124_3473 | Oant_3318 | Dipeptide transport system permease protein DppC (TC 3.A.1.5.2)                |
| ✓ |   | VBIOchAnt73124_3474 | Oant_3319 | Oligopeptide transport system permease protein OppB (TC 3.A.1.5.1)             |
| ✓ |   | VBIOchAnt73124_3475 | Oant_3320 | InterPro IPR000914 COGs COG0747                                                |
| ✓ | ✓ | VBIOchAnt73124_3476 | Oant_3321 | putative short-chain alcohol dehydrogenase                                     |
| ✓ | ✓ | VBIOchAnt73124_3477 | Oant_3322 | Bll2707 protein                                                                |
| ✓ | ✓ | VBIOchAnt73124_3478 | Oant_3323 | Choline-sulfatase                                                              |
| ✓ | ✓ | VBIOchAnt73124_3479 | Oant_3324 | L-proline glycine betaine binding ABC transporter protein ProX (TC 3.A.1.12.1) |
| ✓ | ✓ | VBIOchAnt73124_3480 | Oant_3325 | Transcriptional regulator, LysR family                                         |
| ✓ | ✓ | VBIOchAnt73124_3481 | Oant_3326 | hypothetical protein                                                           |
| ✓ | ✓ | VBIOchAnt73124_3484 | Oant_3329 | Glyoxalase family protein                                                      |
| ✓ | ✓ | VBIOchAnt73124_3485 | Oant_3330 | Carboxylesterase                                                               |
| ✓ | ✓ | VBIOchAnt73124_3489 | Oant_3334 | ABC transporter, nucleotide binding/ATPase protein                             |
| ✓ |   | VBIOchAnt73124_3490 | Oant_3335 | transcriptional regulator, GntR family                                         |
| ✓ | ✓ | VBIOchAnt73124_3491 | Oant_3336 | Dihydrodipicolinate synthase                                                   |
| ✓ |   | VBIOchAnt73124_3496 | Oant_3341 | Gluconate dehydratase                                                          |
| ✓ | ✓ | VBIOchAnt73124_3497 | Oant_3342 | conserved hypothetical protein                                                 |
| ✓ | ✓ | VBIOchAnt73124_3498 | Oant_3343 | Dehydratase, IlvD/Edd family                                                   |
| ✓ | ✓ | VBIOchAnt73124_3499 | Oant_3344 | Demethylmenaquinone methyltransferase                                          |
| ✓ | ✓ | VBIOchAnt73124_3500 | Oant_3345 | Ribose ABC transporter, periplasmic ribose-binding protein RbsB (TC 3.A.1.2.1) |
| ✓ | ✓ | VBIOchAnt73124_3502 | Oant_3347 | Putative ribose/galactose/methyl galactoside import ATP-binding protein 1      |
| ✓ | ✓ | VBIOchAnt73124_3503 | Oant_3348 | Hemolysins and related proteins containing CBS domains                         |
| ✓ |   | VBIOchAnt73124_3505 | Oant_3349 | diguanylate cyclase/phosphodiesterase                                          |
| ✓ |   | VBIOchAnt73124_3506 | Oant_3350 | hypothetical protein                                                           |
| ✓ | ✓ | VBIOchAnt73124_3507 | Oant_3351 | hypothetical protein                                                           |
| ✓ | ✓ | VBIOchAnt73124_3508 | Oant_3352 | hypothetical protein                                                           |
| ✓ | ✓ | VBIOchAnt73124_3514 | Oant_3358 | D-serine dehydratase transcriptional activator                                 |
| ✓ |   | VBIOchAnt73124_3515 | Oant_3359 | Permease of the drug/metabolite transporter (DMT) superfamily                  |
| ✓ | ✓ | VBIOchAnt73124_3516 | Oant_3360 | COG1309: Transcriptional regulator                                             |
| ✓ | ✓ | VBIOchAnt73124_3518 | Oant_3362 | GGDEF:GAF                                                                      |
| ✓ | ✓ | VBIOchAnt73124_3553 | Oant_3396 | Orf21; putative lipoprotein                                                    |

|   |   |                     |           |                                                                                                    |
|---|---|---------------------|-----------|----------------------------------------------------------------------------------------------------|
| √ | √ | VBIOchAnt73124_3554 | Oant_3397 | RNA polymerase sigma-54 factor RpoN                                                                |
| √ | √ | VBIOchAnt73124_3555 | Oant_3398 | Transmembrane regulator protein PrtR                                                               |
| √ | √ | VBIOchAnt73124_3559 | Oant_3401 | transcriptional regulator, FadR/GntR family                                                        |
| √ |   | VBIOchAnt73124_3560 | Oant_3402 | hypothetical protein                                                                               |
| √ | √ | VBIOchAnt73124_3563 | Oant_3405 | UDP-glucose 4-epimerase                                                                            |
| √ | √ | VBIOchAnt73124_3579 | Oant_3421 | Tricarboxylate transport membrane protein TctA                                                     |
| √ | √ | VBIOchAnt73124_3580 | Oant_3422 | Tricarboxylate transport protein TctB                                                              |
| √ | √ | VBIOchAnt73124_3581 | Oant_3423 | Tricarboxylate transport protein TctC                                                              |
| √ | √ | VBIOchAnt73124_3584 | Oant_3426 | Probable transmembrane protein                                                                     |
| √ |   | VBIOchAnt73124_3586 | Oant_3428 | hypothetical protein                                                                               |
| √ |   | VBIOchAnt73124_3587 | Oant_3429 | STRUCTURAL ELEMENTS; Cell Exterior; surface polysaccharides/antigens                               |
| √ |   | VBIOchAnt73124_3588 | Oant_3430 | STRUCTURAL ELEMENTS; Cell Exterior; surface polysaccharides/antigens                               |
| √ |   | VBIOchAnt73124_3589 | Oant_3431 | STRUCTURAL ELEMENTS; Cell Exterior; surface polysaccharides/antigens                               |
| √ |   | VBIOchAnt73124_3590 | Oant_3432 | STRUCTURAL ELEMENTS; Cell Exterior; surface polysaccharides/antigens                               |
| √ |   | VBIOchAnt73124_3591 | Oant_3433 | STRUCTURAL ELEMENTS; Cell Exterior; surface polysaccharides/antigens                               |
| √ | √ | VBIOchAnt73124_3592 | Oant_3434 | STRUCTURAL ELEMENTS; Cell Exterior; surface polysaccharides/antigens                               |
| √ | √ | VBIOchAnt73124_3595 | Oant_3436 | STRUCTURAL ELEMENTS; Cell Exterior; surface polysaccharides/antigens                               |
| √ | √ | VBIOchAnt73124_3596 | Oant_3437 | STRUCTURAL ELEMENTS; Cell Exterior; surface polysaccharides/antigens                               |
| √ |   | VBIOchAnt73124_3597 | Oant_3438 | transcriptional activator of exopolysaccharide II synthesis, MarR family protein                   |
| √ |   | VBIOchAnt73124_3598 | Oant_3439 | Probable glycosyltransferase                                                                       |
| √ |   | VBIOchAnt73124_3599 | Oant_3440 | STRUCTURAL ELEMENTS; Cell Exterior; surface polysaccharides/antigens                               |
| √ |   | VBIOchAnt73124_3600 | Oant_3441 | STRUCTURAL ELEMENTS; Cell Exterior; surface polysaccharides/antigens                               |
| √ |   | VBIOchAnt73124_3601 | Oant_3442 | STRUCTURAL ELEMENTS; Cell Exterior; surface polysaccharides/antigens                               |
| √ |   | VBIOchAnt73124_3602 | Oant_3443 | STRUCTURAL ELEMENTS; Cell Exterior; surface polysaccharides/antigens                               |
| √ |   | VBIOchAnt73124_3603 | Oant_3444 | putative protein, probably exported to periplasma                                                  |
| √ |   | VBIOchAnt73124_3604 | Oant_3445 | hypothetical protein                                                                               |
| √ | √ | VBIOchAnt73124_3605 | Oant_3446 | Multimodular transpeptidase-transglycosylase                                                       |
| √ | √ | VBIOchAnt73124_3606 | Oant_3447 | PAN domain protein                                                                                 |
| √ | √ | VBIOchAnt73124_3607 | Oant_3448 | Enoyl-[acyl-carrier-protein] reductase [NADPH]                                                     |
| √ | √ | VBIOchAnt73124_3608 | Oant_3449 | Transcriptional regulator, LysR family                                                             |
| √ | √ | VBIOchAnt73124_3611 | Oant_3452 | hypothetical protein                                                                               |
| √ | √ | VBIOchAnt73124_3612 | Oant_3453 | Threonine dehydrogenase and related Zn-dependent dehydrogenases                                    |
| √ | √ | VBIOchAnt73124_3616 | Oant_3457 | cell processes; transport of small molecules                                                       |
| √ | √ | VBIOchAnt73124_3617 | Oant_3458 | Sugar phosphate isomerases/epimerases                                                              |
| √ | √ | VBIOchAnt73124_3618 | Oant_3459 | PUTATIVE OXIDOREDUCTASE PROTEIN                                                                    |
| √ | √ | VBIOchAnt73124_3619 | Oant_3460 | transcription regulator                                                                            |
| √ | √ | VBIOchAnt73124_3620 | Oant_3461 | Transcriptional regulator GabR of GABA utilization (GntR family with aminotransferase-like domain) |
| √ | √ | VBIOchAnt73124_3621 | Oant_3462 | amino acid ABC transporter, ATP-binding protein                                                    |

|   |   |   |                     |           |                                                                                                                                            |
|---|---|---|---------------------|-----------|--------------------------------------------------------------------------------------------------------------------------------------------|
| √ | √ | √ | VBIOchAnt73124_3623 | Oant_3464 | amino acid ABC transporter, permease protein                                                                                               |
| √ | √ | √ | VBIOchAnt73124_3624 | Oant_3465 | ABC transporter, substrate binding protein [amino acid]                                                                                    |
| √ | √ | √ | VBIOchAnt73124_3625 | Oant_3466 | succinate dehydrogenase subunit                                                                                                            |
| √ | √ | √ | VBIOchAnt73124_3626 | Oant_3467 | Xaa-Pro aminopeptidase                                                                                                                     |
| √ | √ | √ | VBIOchAnt73124_3627 | Oant_3468 | Ornithine cyclodeaminase                                                                                                                   |
| √ | √ | √ | VBIOchAnt73124_3628 | Oant_3469 | Threonine dehydratase, catabolic                                                                                                           |
| √ | √ | √ | VBIOchAnt73124_3629 | Oant_3470 | Leucine-responsive regulatory protein, regulator for leucine (or lrp) regulon and high-affinity branched-chain amino acid transport system |
| √ | √ | √ | VBIOchAnt73124_3630 | Oant_3471 | Succinate-semialdehyde dehydrogenase [NADP+]                                                                                               |
| √ | √ | √ | VBIOchAnt73124_3631 | Oant_3472 | Gamma-aminobutyrate:alpha-ketoglutarate aminotransferase                                                                                   |
| √ |   | √ | VBIOchAnt73124_3633 | Oant_3474 | Ferrichrome-iron receptor                                                                                                                  |
| √ | √ | √ | VBIOchAnt73124_3634 | Oant_3475 | transcriptional regulatory protein                                                                                                         |
| √ |   | √ | VBIOchAnt73124_3635 | Oant_3476 | Ferric hydroxamate ABC transporter (TC 3.A.1.14.3), ATP-binding protein FhuC                                                               |
| √ | √ |   | VBIOchAnt73124_3636 | Oant_3477 | Glutathione S-transferase, N-terminal domain                                                                                               |
| √ | √ | √ | VBIOchAnt73124_3637 | Oant_3478 | C4-dicarboxylate transport transcriptional regulatory protein dctD                                                                         |
| √ | √ | √ | VBIOchAnt73124_3638 | Oant_3479 | Signal transduction histidine kinase regulating C4-dicarboxylate transport system                                                          |
| √ | √ | √ | VBIOchAnt73124_3639 | Oant_3480 | C4-dicarboxylate transport protein                                                                                                         |
| √ | √ | √ | VBIOchAnt73124_3644 | Oant_3485 | Uncharacterized protein conserved in bacteria                                                                                              |
| √ |   | √ | VBIOchAnt73124_3646 | Oant_3487 | N-acetylmannosamine kinase                                                                                                                 |
| √ | √ | √ | VBIOchAnt73124_3647 | Oant_3488 | Cytoplasmic copper homeostasis protein cutC                                                                                                |
| √ | √ |   | VBIOchAnt73124_3650 | Oant_3492 | Transcriptional regulator, GntR family domain / Aspartate aminotransferase                                                                 |
| √ | √ |   | VBIOchAnt73124_3651 | Oant_3493 | Pyridoxamine 5'-phosphate oxidase-related, FMN-binding                                                                                     |
| √ |   |   | VBIOchAnt73124_3652 | Oant_3494 | putative transcriptional regulator, asnC family                                                                                            |
| √ |   |   | VBIOchAnt73124_3653 | Oant_3496 | Amino acid ABC transporter, periplasmic amino acid-binding protein                                                                         |
| √ |   |   | VBIOchAnt73124_3654 | Oant_3497 | Putative transport system permease protein                                                                                                 |
| √ |   |   | VBIOchAnt73124_3655 | Oant_3498 | ABC-type amino acid transport system, permease component                                                                                   |
| √ |   | √ | VBIOchAnt73124_3656 | Oant_3499 | Glutamate transport ATP-binding protein                                                                                                    |
| √ |   |   | VBIOchAnt73124_3657 | Oant_3500 | Arginine utilization protein RocB                                                                                                          |
| √ |   |   | VBIOchAnt73124_3658 | Oant_3501 | Phosphate acetyltransferase                                                                                                                |
| √ |   |   | VBIOchAnt73124_3659 | Oant_3502 | Sulfoacetaldehyde acetyltransferase                                                                                                        |
| √ |   |   | VBIOchAnt73124_3660 | Oant_3503 | Oxidoreductase                                                                                                                             |
| √ | √ |   | VBIOchAnt73124_3661 | Oant_3504 | Ketosteroid isomerase-related protein                                                                                                      |
| √ | √ |   | VBIOchAnt73124_3665 | Oant_3508 | Transcriptional regulator, MocR family, putative Taurine regulator tauR                                                                    |
| √ | √ | √ | VBIOchAnt73124_3666 | Oant_3509 | hypothetical protein                                                                                                                       |
| √ |   |   | VBIOchAnt73124_3668 | Oant_3511 | hypothetical protein                                                                                                                       |
| √ | √ |   | VBIOchAnt73124_3669 | Oant_3512 | ABC-type nitrate/sulfonate/bicarbonate transport systems, periplasmic components                                                           |
| √ | √ |   | VBIOchAnt73124_3670 | Oant_3513 | ABC-type nitrate/sulfonate/bicarbonate transport system, ATPase component                                                                  |
| √ | √ |   | VBIOchAnt73124_3671 | Oant_3514 | ABC-type nitrate/sulfonate/bicarbonate transport system, permease component                                                                |
| √ | √ | √ | VBIOchAnt73124_3672 | Oant_3515 | hypothetical protein                                                                                                                       |

|   |   |   |                     |           |                                                                                                |
|---|---|---|---------------------|-----------|------------------------------------------------------------------------------------------------|
| √ | √ | √ | VBIOchAnt73124_3673 | Oant_3516 | two-component response regulator                                                               |
| √ |   |   | VBIOchAnt73124_3674 | Oant_3517 | hypothetical protein                                                                           |
| √ |   | √ | VBIOchAnt73124_3676 | Oant_3518 | Catalyzes the cleavage of p-aminobenzoyl-glutamate to p-aminobenzoate and glutamate, subunit B |
| √ | √ | √ | VBIOchAnt73124_3677 | Oant_3519 | hypothetical protein                                                                           |
| √ | √ | √ | VBIOchAnt73124_3678 | Oant_3520 | octopine transport system permease protein                                                     |
| √ | √ | √ | VBIOchAnt73124_3680 | Oant_3522 | Amino acid ABC transporter, periplasmic amino acid-binding protein                             |
| √ | √ | √ | VBIOchAnt73124_3682 | Oant_3524 | Protein containing domains DUF404, DUF407                                                      |
| √ | √ | √ | VBIOchAnt73124_3683 | Oant_3525 | Protein containing domains DUF403                                                              |
| √ | √ | √ | VBIOchAnt73124_3684 | Oant_3526 | Protein containing transglutaminase-like domain, putative cysteine protease                    |
| √ |   | √ | VBIOchAnt73124_3685 | Oant_3527 | hypothetical protein                                                                           |
| √ |   |   | VBIOchAnt73124_3718 | Oant_3559 | Macrolide-specific efflux protein MacA                                                         |
| √ | √ | √ | VBIOchAnt73124_3719 | Oant_3560 | hypothetical protein                                                                           |
| √ |   |   | VBIOchAnt73124_3721 | Oant_3562 | D-alanine aminotransferase                                                                     |
| √ |   | √ | VBIOchAnt73124_3723 | Oant_3563 | putative transcriptional regulator                                                             |
| √ | √ | √ | VBIOchAnt73124_3736 | Oant_3576 | probable dehydrogenase                                                                         |
| √ |   |   | VBIOchAnt73124_3737 | Oant_3577 | Putrescine transport ATP-binding protein PotA (TC 3.A.1.11.1)                                  |
| √ |   |   | VBIOchAnt73124_3738 | Oant_3578 | Spermidine/putrescine-binding periplasmic protein                                              |
| √ |   | √ | VBIOchAnt73124_3739 | Oant_3579 | ABC transporter permease protein                                                               |
| √ |   |   | VBIOchAnt73124_3740 | Oant_3580 | putative ABC transporter, permease                                                             |
| √ |   | √ | VBIOchAnt73124_3741 | Oant_3581 | Histidinol dehydrogenase                                                                       |
| √ | √ | √ | VBIOchAnt73124_3742 | Oant_3582 | hypothetical protein                                                                           |
| √ |   | √ | VBIOchAnt73124_3744 | Oant_3584 | Rrf2 family transcriptional regulator, group III                                               |
| √ |   | √ | VBIOchAnt73124_3745 | Oant_3585 | Thioredoxin reductase                                                                          |
| √ |   | √ | VBIOchAnt73124_3746 | Oant_3586 | putative transmembrane protein                                                                 |
| √ |   | √ | VBIOchAnt73124_3747 | Oant_3587 | hypothetical protein                                                                           |
| √ | √ | √ | VBIOchAnt73124_3748 | Oant_3588 | Transcriptional regulator, LysR family                                                         |
| √ |   |   | VBIOchAnt73124_3756 | Oant_3596 | Oligopeptide ABC transporter, periplasmic oligopeptide-binding protein OppA (TC 3.A.1.5.1)     |
| √ |   |   | VBIOchAnt73124_3757 | Oant_3597 | ATP/GTP-binding site motif A (P-loop) :Porin, alpha proteobacteria type                        |
| √ | √ | √ | VBIOchAnt73124_3763 | Oant_3603 | putative two-component response regulator with GGDEF sensory box protein                       |
| √ |   | √ | VBIOchAnt73124_3765 | Oant_3605 | Alcohol dehydrogenase                                                                          |
| √ | √ | √ | VBIOchAnt73124_3767 | Oant_3606 | Transcriptional regulator, AraC family                                                         |
| √ |   |   | VBIOchAnt73124_3768 | Oant_3607 | Gluconate 2-dehydrogenase, membrane-bound, cytochrome c                                        |
| √ |   |   | VBIOchAnt73124_3769 | Oant_3608 | Gluconate 2-dehydrogenase, membrane-bound, flavoprotein                                        |
| √ |   |   | VBIOchAnt73124_3770 | Oant_3609 | Gluconate 2-dehydrogenase, membrane-bound, gamma subunit                                       |
| √ | √ | √ | VBIOchAnt73124_3772 | Oant_3611 | hypothetical protein                                                                           |
| √ |   | √ | VBIOchAnt73124_3776 | Oant_3615 | Bll4831 protein                                                                                |
| √ | √ | √ | VBIOchAnt73124_3781 | Oant_3620 | Periplasmic hemin-binding protein                                                              |

|   |   |   |                     |           |                                                                                           |
|---|---|---|---------------------|-----------|-------------------------------------------------------------------------------------------|
| √ | √ | √ | VBIOchAnt73124_3782 | Oant_3621 | Hemin transport protein HmuS                                                              |
| √ |   | √ | VBIOchAnt73124_3783 | Oant_3622 | hypothetical protein                                                                      |
| √ | √ | √ | VBIOchAnt73124_3789 | Oant_3628 | putative acetyltransferase                                                                |
| √ | √ | √ | VBIOchAnt73124_3811 | Oant_3649 | hypothetical protein                                                                      |
| √ | √ |   | VBIOchAnt73124_3812 | Oant_3650 | hypothetical protein                                                                      |
| √ |   | √ | VBIOchAnt73124_3815 | Oant_3653 | hypothetical protein                                                                      |
| √ | √ | √ | VBIOchAnt73124_3816 | Oant_3654 | Putative Heme-regulated two-component response regulator                                  |
| √ |   | √ | VBIOchAnt73124_3821 | Oant_3659 | putative acetyltransferase                                                                |
| √ | √ | √ | VBIOchAnt73124_3823 | Oant_3661 | acetyl transferase                                                                        |
| √ |   |   | VBIOchAnt73124_3833 | Oant_3670 | hypothetical protein                                                                      |
| √ | √ | √ | VBIOchAnt73124_3862 | Oant_3698 | Manganese ABC transporter, periplasmic-binding protein SitA                               |
| √ | √ | √ | VBIOchAnt73124_3863 | Oant_3699 | Manganese ABC transporter, ATP-binding protein SitB                                       |
| √ | √ | √ | VBIOchAnt73124_3864 | Oant_3700 | Manganese ABC transporter, inner membrane permease protein SitC                           |
| √ | √ | √ | VBIOchAnt73124_3865 | Oant_3701 | Manganese ABC transporter, inner membrane permease protein SitD                           |
| √ |   |   | VBIOchAnt73124_3866 | Oant_3702 | SN-glycerol-3-phosphate transport ATP-binding protein UgpC (TC 3.A.1.1.3)                 |
| √ |   |   | VBIOchAnt73124_3867 | Oant_3703 | ABC transporter periplasmic binding protein                                               |
| √ |   | √ | VBIOchAnt73124_3868 | Oant_3704 | hypothetical protein                                                                      |
| √ |   | √ | VBIOchAnt73124_3869 | Oant_3705 | ABC transporter permease protein                                                          |
| √ |   |   | VBIOchAnt73124_3870 | Oant_3706 | Transcriptional regulator, LacI family                                                    |
| √ | √ | √ | VBIOchAnt73124_3872 | Oant_3708 | Oxidoreductase, aldo/keto reductase family                                                |
| √ |   | √ | VBIOchAnt73124_3900 | Oant_3736 | D-alanyl-D-alanine carboxypeptidase                                                       |
| √ |   | √ | VBIOchAnt73124_3901 | Oant_3737 | Oligopeptide transport ATP-binding protein OppF (TC 3.A.1.5.1)                            |
| √ |   | √ | VBIOchAnt73124_3902 | Oant_3738 | Dipeptide transport ATP-binding protein DppD (TC 3.A.1.5.2)                               |
| √ |   |   | VBIOchAnt73124_3903 | Oant_3739 | Dipeptide transport system permease protein DppC (TC 3.A.1.5.2)                           |
| √ |   | √ | VBIOchAnt73124_3904 | Oant_3740 | Dipeptide transport system permease protein DppB (TC 3.A.1.5.2)                           |
| √ |   |   |                     |           | Dipeptide-binding ABC transporter, periplasmic substrate-binding component (TC 3.A.1.5.2) |
| √ |   | √ | VBIOchAnt73124_3905 | Oant_3741 | hypothetical protein                                                                      |
| √ |   | √ | VBIOchAnt73124_3907 | Oant_3743 | hypothetical protein                                                                      |
| √ |   | √ | VBIOchAnt73124_3908 | Oant_3744 | D-3-phosphoglycerate dehydrogenase                                                        |
| √ |   |   | VBIOchAnt73124_3909 | Oant_3745 | putative ABC transporter ATP-binding protein                                              |
| √ | √ | √ | VBIOchAnt73124_3910 | Oant_3746 | hypothetical protein                                                                      |
| √ | √ | √ | VBIOchAnt73124_3911 | Oant_3747 | putative ABC transporter permease                                                         |
| √ |   | √ | VBIOchAnt73124_3912 | Oant_3748 | putative ABC transporter permease                                                         |
| √ |   |   | VBIOchAnt73124_3913 | Oant_3749 | putative LacI-family transcriptional regulator                                            |
| √ | √ | √ | VBIOchAnt73124_3919 | Oant_3755 | Gluconokinase                                                                             |
| √ | √ | √ | VBIOchAnt73124_3920 | Oant_3756 | 5-keto-D-gluconate 5-reductase                                                            |
| √ | √ | √ | VBIOchAnt73124_3922 | Oant_3758 | D-2-hydroxyglutarate dehydrogenase                                                        |
| √ |   | √ | VBIOchAnt73124_3924 | Oant_3760 | 2-hydroxy-3-oxopropionate reductase                                                       |
| √ | √ | √ | VBIOchAnt73124_3925 | Oant_3761 | Gluconate dehydratase                                                                     |

|   |   |   |                     |           |                                                                                                                        |
|---|---|---|---------------------|-----------|------------------------------------------------------------------------------------------------------------------------|
| √ | √ | √ | VBIOchAnt73124_3926 | Oant_3762 | Fumarylacetoacetate hydrolase family protein                                                                           |
|   |   |   |                     |           | TRAP-type transport system, small permease component, predicted N-acetylneuraminate transporter                        |
| √ |   | √ | VBIOchAnt73124_3927 | Oant_3763 |                                                                                                                        |
| √ |   | √ | VBIOchAnt73124_3928 | Oant_3764 | TRAP-type C4-dicarboxylate transport system, large permease component                                                  |
| √ |   | √ | VBIOchAnt73124_3929 | Oant_3765 | TRAP-type C4-dicarboxylate transport system, periplasmic component                                                     |
| √ |   | √ | VBIOchAnt73124_3930 | Oant_3766 | Sugar phosphate isomerases/epimerases                                                                                  |
| √ | √ | √ | VBIOchAnt73124_3939 | Oant_3776 | Potassium-transporting ATPase A chain (TC 3.A.3.7.1)                                                                   |
| √ | √ | √ | VBIOchAnt73124_3941 | Oant_3777 | Potassium-transporting ATPase B chain (TC 3.A.3.7.1)                                                                   |
| √ | √ | √ | VBIOchAnt73124_3942 | Oant_3778 | Potassium-transporting ATPase C chain (TC 3.A.3.7.1)                                                                   |
| √ | √ | √ | VBIOchAnt73124_3943 | Oant_3779 | Osmosensitive K+ channel histidine kinase KdpD                                                                         |
| √ | √ | √ | VBIOchAnt73124_3944 | Oant_3780 | DNA-binding response regulator KdpE                                                                                    |
| √ | √ |   | VBIOchAnt73124_3954 | Oant_3789 | 2-Oxobutyrate oxidase, putative                                                                                        |
| √ |   |   | VBIOchAnt73124_3956 | Oant_3791 | Methionine ABC transporter ATP-binding protein                                                                         |
| √ |   |   | VBIOchAnt73124_3957 | Oant_3792 | Methionine ABC transporter substrate-binding protein                                                                   |
| √ |   |   | VBIOchAnt73124_3958 | Oant_3793 | Aspartate/tyrosine/aromatic aminotransferase                                                                           |
| √ | √ | √ | VBIOchAnt73124_3959 | Oant_3794 | hypothetical protein                                                                                                   |
| √ | √ | √ | VBIOchAnt73124_3960 | Oant_3795 | TonB-dependent receptor; Outer membrane receptor for ferrienterochelin and colicins                                    |
| √ |   | √ | VBIOchAnt73124_3966 | Oant_3801 | hypothetical protein                                                                                                   |
| √ |   | √ | VBIOchAnt73124_3967 | Oant_3802 | Dipeptide transport system permease protein DppC (TC 3.A.1.5.2)                                                        |
|   |   |   |                     |           | Dipeptide-binding ABC transporter, periplasmic substrate-binding component (TC 3.A.1.5.2)                              |
| √ | √ | √ | VBIOchAnt73124_3969 | Oant_3804 |                                                                                                                        |
| √ |   | √ | VBIOchAnt73124_3970 | Oant_3805 | Dipeptide transport ATP-binding protein DppD (TC 3.A.1.5.2)                                                            |
| √ | √ | √ | VBIOchAnt73124_4016 | Oant_3848 | Multiple polyol-specific dehydrogenase                                                                                 |
| √ | √ | √ | VBIOchAnt73124_4017 | Oant_3849 | Sorbitol dehydrogenase                                                                                                 |
| √ | √ | √ | VBIOchAnt73124_4020 | Oant_3852 | Various polyols ABC transporter, permease component 2                                                                  |
| √ | √ | √ | VBIOchAnt73124_4021 | Oant_3853 | Various polyols ABC transporter, permease component 1                                                                  |
| √ | √ | √ | VBIOchAnt73124_4022 | Oant_3854 | Various polyols ABC transporter, periplasmic substrate-binding protein                                                 |
|   |   |   |                     |           | Ferrous iron transport periplasmic protein EfeO, contains peptidase-M75 domain and (frequently) cupredoxin-like domain |
| √ |   |   | VBIOchAnt73124_4024 | Oant_3856 |                                                                                                                        |
| √ |   |   | VBIOchAnt73124_4025 | Oant_3857 | Ferrous iron transport peroxidase EfeB                                                                                 |
|   |   |   |                     |           | Ferrous iron transport periplasmic protein EfeO, contains peptidase-M75 domain and (frequently) cupredoxin-like domain |
| √ |   |   | VBIOchAnt73124_4026 | Oant_3858 |                                                                                                                        |
| √ | √ |   | VBIOchAnt73124_4035 | Oant_3867 | hypothetical protein                                                                                                   |
| √ |   |   | VBIOchAnt73124_4037 | Oant_3869 | Creatinine amidohydrolase                                                                                              |
| √ | √ |   | VBIOchAnt73124_4038 | Oant_3870 | ABC-type nitrate/sulfonate/bicarbonate transport system, ATPase component                                              |
| √ | √ |   | VBIOchAnt73124_4039 | Oant_3871 | Hydroxymethylpyrimidine ABC transporter, transmembrane component                                                       |
| √ | √ |   | VBIOchAnt73124_4040 | Oant_3872 | Cytosine deaminase                                                                                                     |
| √ | √ |   | VBIOchAnt73124_4041 | Oant_3873 | FAD/FMN-containing dehydrogenase                                                                                       |
| √ | √ | √ | VBIOchAnt73124_4042 | Oant_3874 | Hydroxymethylpyrimidine ABC transporter, substrate-binding component                                                   |
| √ |   |   | VBIOchAnt73124_4043 | Oant_3875 | transcriptional regulator, TetR family                                                                                 |

|   |   |                     |           |                                                                                                  |
|---|---|---------------------|-----------|--------------------------------------------------------------------------------------------------|
| √ |   | VBIOchAnt73124_4047 | Oant_3878 | TRAP-type C4-dicarboxylate transport system, small permease component                            |
| √ |   | VBIOchAnt73124_4048 | Oant_3879 | TRAP-type C4-dicarboxylate transport system, large permease component                            |
| √ |   | VBIOchAnt73124_4049 | Oant_3880 | TRAP-type C4-dicarboxylate transport system, periplasmic component                               |
| √ | √ | VBIOchAnt73124_4051 | Oant_3882 | aldehyde dehydrogenase)                                                                          |
| √ |   | VBIOchAnt73124_4069 | Oant_3900 | TRAP dicarboxylate transporter, DctM subunit, unknown substrate 8                                |
| √ |   | VBIOchAnt73124_4070 | Oant_3901 | TRAP dicarboxylate transporter, DctQ subunit, unknown substrate 8                                |
| √ | √ | VBIOchAnt73124_4071 | Oant_3902 | TRAP transporter solute receptor, unknown substrate 8                                            |
| √ | √ | VBIOchAnt73124_4072 | Oant_3903 | Sorbitol dehydrogenase                                                                           |
| √ | √ | VBIOchAnt73124_4075 | Oant_3906 | Altronate oxidoreductase                                                                         |
| √ | √ | VBIOchAnt73124_4076 | Oant_3907 | DNA-binding response regulator, LuxR family                                                      |
| √ | √ | VBIOchAnt73124_4077 | Oant_3908 | Miscellaneous; Not classified regulator                                                          |
| √ | √ | VBIOchAnt73124_4079 | Oant_3910 | Ribose ABC transport system, ATP-binding protein RbsA (TC 3.A.1.2.1)                             |
| √ | √ | VBIOchAnt73124_4080 | Oant_3911 | Ribose ABC transport system, permease protein RbsC (TC 3.A.1.2.1)                                |
| √ | √ | VBIOchAnt73124_4082 | Oant_3913 | Gluconolactonase                                                                                 |
| √ |   | VBIOchAnt73124_4087 |           | hypothetical protein                                                                             |
| √ | √ | VBIOchAnt73124_4088 | Oant_3917 | Tricarboxylate transport protein TctC                                                            |
| √ | √ | VBIOchAnt73124_4089 | Oant_3918 | tricarboxylate transport protein TctB, putative                                                  |
| √ | √ | VBIOchAnt73124_4090 | Oant_3919 | Tricarboxylate transport membrane protein TctA                                                   |
| √ | √ | VBIOchAnt73124_4091 |           | hypothetical protein                                                                             |
| √ | √ | VBIOchAnt73124_4093 | Oant_3921 | MgtC/SapB transporter                                                                            |
| √ | √ | VBIOchAnt73124_4094 | Oant_3922 | hypothetical protein                                                                             |
| √ | √ | VBIOchAnt73124_4107 | Oant_3935 | hypothetical protein                                                                             |
| √ | √ | VBIOchAnt73124_4113 | Oant_3941 | Cobalt-zinc-cadmium resistance protein CzcD                                                      |
| √ | √ | VBIOchAnt73124_4114 | Oant_3942 | protein of unknown function DUF156                                                               |
| √ |   | VBIOchAnt73124_4115 | Oant_3943 | Prephenate and/or arogenate dehydrogenase (unknown specificity)                                  |
| √ | √ | VBIOchAnt73124_4120 | Oant_3948 | DNA-directed RNA polymerase specialized sigma subunit, sigma24-like                              |
| √ | √ | VBIOchAnt73124_4121 | Oant_3949 | 4-carboxymuconolactone decarboxylase domain/alkylhydroperoxidase AhpD family core domain protein |
| √ | √ | VBIOchAnt73124_4122 | Oant_3950 | probable gst14 glutathione S-transferase( EC:2.5.1.18 )                                          |
| √ | √ | VBIOchAnt73124_4123 | Oant_3951 | Glycine cleavage system transcriptional activator GcvA                                           |
| √ | √ | VBIOchAnt73124_4125 | Oant_3952 | Transcriptional regulator, GntR family                                                           |
| √ | √ | VBIOchAnt73124_4127 | Oant_3954 | metal-dependent phosphohydrolase                                                                 |
| √ |   | VBIOchAnt73124_4133 | Oant_3960 | hypothetical protein                                                                             |
| √ |   | VBIOchAnt73124_4134 | Oant_3961 | Hydrolase (HAD superfamily)                                                                      |
| √ | √ | VBIOchAnt73124_4151 | Oant_3977 | SN-glycerol-3-phosphate transport ATP-binding protein UgpC (TC 3.A.1.1.3)                        |
| √ | √ | VBIOchAnt73124_4152 | Oant_3978 | SN-glycerol-3-phosphate transport ATP-binding protein UgpC (TC 3.A.1.1.3)                        |
| √ | √ | VBIOchAnt73124_4153 | Oant_3979 | SN-glycerol-3-phosphate transport system permease protein UgpA (TC 3.A.1.1.3)                    |
| √ | √ | VBIOchAnt73124_4154 | Oant_3980 | SN-glycerol-3-phosphate transport system permease protein UgpE (TC 3.A.1.1.3)                    |
| √ | √ | VBIOchAnt73124_4156 | Oant_3982 | SN-glycerol-3-phosphate transport system permease protein UgpA (TC 3.A.1.1.3)                    |

|   |   |                     |                     |                                                                                       |                                                |
|---|---|---------------------|---------------------|---------------------------------------------------------------------------------------|------------------------------------------------|
| √ | √ | VBIOchAnt73124_4164 | Oant_3990           | Membrane fusion component of tripartite multidrug resistance system                   |                                                |
| √ | √ | VBIOchAnt73124_4200 | Oant_4024           | extracellular solute-binding protein, family 3                                        |                                                |
| √ | √ | √                   | VBIOchAnt73124_4210 | Oant_4035                                                                             | hypothetical protein                           |
| √ |   | VBIOchAnt73124_4213 | Oant_4038           | hypothetical protein                                                                  |                                                |
| √ | √ | √                   | VBIOchAnt73124_4218 | Oant_4043                                                                             | mRNA 3-end processing factor                   |
| √ | √ | √                   | VBIOchAnt73124_4219 | Oant_4044                                                                             | ATP-dependent DNA ligase LigC                  |
| √ |   | VBIOchAnt73124_4233 | Oant_4059           | Putative transcriptional regulatory protein                                           |                                                |
| √ |   | VBIOchAnt73124_4234 | Oant_4060           | Ribokinase                                                                            |                                                |
| √ |   | VBIOchAnt73124_4235 | Oant_4061           | Ribose ABC transport system, permease protein RbsC (TC 3.A.1.2.1)                     |                                                |
| √ |   | VBIOchAnt73124_4236 | Oant_4062           | Ribose ABC transport system, ATP-binding protein RbsA (TC 3.A.1.2.1)                  |                                                |
| √ |   | VBIOchAnt73124_4237 | Oant_4063           | Ribose ABC transport system, periplasmic ribose-binding protein RbsB (TC 3.A.1.2.1)   |                                                |
| √ |   | VBIOchAnt73124_4238 | Oant_4064           | Ribose ABC transport system, permease protein RbsC (TC 3.A.1.2.1)                     |                                                |
| √ |   | VBIOchAnt73124_4247 | Oant_4073           | blr6818; hypothetical protein                                                         |                                                |
| √ | √ | VBIOchAnt73124_4255 | Oant_4081           | COG0028: Thiamine pyrophosphate-requiring enzymes                                     |                                                |
| √ | √ | VBIOchAnt73124_4261 | Oant_4087           | Outer membrane receptor proteins, mostly Fe transport                                 |                                                |
| √ |   | VBIOchAnt73124_4262 | Oant_4088           | Nitrilotriacetate monooxygenase                                                       |                                                |
| √ |   | VBIOchAnt73124_4272 | Oant_4099           | DUF1850 domain-containing protein                                                     |                                                |
| √ |   | VBIOchAnt73124_4273 | Oant_4100           | TRAP transporter, 4TM/12TM fusion protein, unknown substrate 1                        |                                                |
| √ |   | VBIOchAnt73124_4274 | Oant_4101           | TRAP transporter solute receptor, unknown substrate 1                                 |                                                |
| √ | √ | VBIOchAnt73124_4280 | Oant_4107           | hypothetical protein                                                                  |                                                |
| √ | √ | VBIOchAnt73124_4281 | Oant_4108           | hypothetical protein                                                                  |                                                |
| √ | √ | VBIOchAnt73124_4282 | Oant_4109           | PTS system, glucitol/sorbitol-specific IIC component                                  |                                                |
| √ | √ | VBIOchAnt73124_4283 | Oant_4110           | PTS system, glucitol/sorbitol-specific IIB component and second of two IIC components |                                                |
| √ | √ | VBIOchAnt73124_4284 | Oant_4111           | hypothetical protein                                                                  |                                                |
| √ | √ | VBIOchAnt73124_4285 | Oant_4112           | Phosphoenolpyruvate-protein phosphotransferase of PTS system                          |                                                |
| √ | √ | VBIOchAnt73124_4286 | Oant_4113           | hypothetical protein                                                                  |                                                |
| √ | √ | √                   | VBIOchAnt73124_4287 | Oant_4114                                                                             | transcriptional regulator                      |
| √ | √ | VBIOchAnt73124_4289 | Oant_4116           | Acetoin dehydrogenase E1 component beta-subunit                                       |                                                |
| √ | √ | VBIOchAnt73124_4290 | Oant_4117           | Acetoin dehydrogenase E1 component alpha-subunit                                      |                                                |
| √ |   | VBIOchAnt73124_4292 | Oant_4119           | PTS system, galactitol-specific IIC component                                         |                                                |
| √ |   | VBIOchAnt73124_4293 | Oant_4120           | PTS system, galactitol-specific IIA component                                         |                                                |
| √ |   | VBIOchAnt73124_4294 | Oant_4121           | phosphotransferase system, lactose/cellobiose-specific IIB subunit                    |                                                |
| √ |   | VBIOchAnt73124_4295 | Oant_4122           | tail-specific protease                                                                |                                                |
| √ | √ | VBIOchAnt73124_4296 | Oant_4125           | (Y14336) putative extracellular protein containing predicted 35aa signal peptide      |                                                |
| √ | √ | VBIOchAnt73124_4297 | Oant_4126           | Transcriptional regulatory protein fixJ                                               |                                                |
| √ | √ | √                   | VBIOchAnt73124_4298 | Oant_4127                                                                             | hypothetical protein                           |
| √ |   | VBIOchAnt73124_4304 | Oant_4135           | Ferric hydroxamate outer membrane receptor FhuA                                       |                                                |
| √ | √ | VBIOchAnt73124_4311 | Oant_4142           | putative membrane protein                                                             |                                                |
| √ | √ | √                   | VBIOchAnt73124_4319 | Oant_4149                                                                             | putative transcriptional regulator,lysR family |

|   |   |                     |           |                                                                                                            |
|---|---|---------------------|-----------|------------------------------------------------------------------------------------------------------------|
| √ | √ | VBIOchAnt73124_4320 | Oant_4150 | Demethylmenaquinone methyltransferase                                                                      |
| √ |   | VBIOchAnt73124_4321 | Oant_4151 | Predicted amidohydrolase                                                                                   |
| √ |   | VBIOchAnt73124_4322 | Oant_4152 | HpcH/Hpal aldolase                                                                                         |
| √ |   | VBIOchAnt73124_4323 | Oant_4153 | binding-protein-dependent transport systems inner membrane component                                       |
| √ | √ | VBIOchAnt73124_4324 | Oant_4154 | Spermidine Putrescine ABC transporter permease component PotB (TC 3.A.1.11.1)                              |
| √ |   | VBIOchAnt73124_4325 | Oant_4155 | spermidine/putrescine ABC transporter ATPase subunit                                                       |
| √ |   | VBIOchAnt73124_4326 | Oant_4156 | ABC opine/polyamine transporter, periplasmic binding protein                                               |
| √ | √ | VBIOchAnt73124_4328 | Oant_4157 | Glutamine synthetase type II, eukaryotic                                                                   |
| √ |   | VBIOchAnt73124_4334 | Oant_4162 | protein tyrosine phosphatase-like                                                                          |
| √ |   | VBIOchAnt73124_4346 | Oant_4175 | Additional periplasmic component NikK of nickel ECF transporter                                            |
| √ |   | VBIOchAnt73124_4404 |           | hypothetical protein                                                                                       |
| √ | √ | VBIOchAnt73124_4405 | Oant_4234 | Uncharacterized protein conserved in bacteria                                                              |
| √ | √ | VBIOchAnt73124_4415 | Oant_4244 | Acetyltransferase                                                                                          |
| √ | √ | VBIOchAnt73124_4444 | Oant_4271 | Low-affinity gluconate/H <sup>+</sup> symporter GntU                                                       |
| √ |   | VBIOchAnt73124_4462 |           | hypothetical protein                                                                                       |
| √ |   | VBIOchAnt73124_4463 | Oant_4286 | hypothetical protein                                                                                       |
| √ | √ | VBIOchAnt73124_4465 |           | hypothetical protein                                                                                       |
| √ |   | VBIOchAnt73124_4468 | Oant_4290 | conserved hypothetical protein                                                                             |
| √ | √ | VBIOchAnt73124_4471 | Oant_4293 | hypothetical protein                                                                                       |
| √ |   | VBIOchAnt73124_4472 |           | hypothetical protein                                                                                       |
| √ |   | VBIOchAnt73124_4473 | Oant_4294 | hypothetical protein                                                                                       |
| √ | √ | VBIOchAnt73124_4474 | Oant_4295 | Protein yciF                                                                                               |
| √ |   | VBIOchAnt73124_4475 | Oant_4296 | hypothetical protein                                                                                       |
| √ | √ | VBIOchAnt73124_4476 | Oant_4298 | hypothetical protein                                                                                       |
| √ | √ | VBIOchAnt73124_4477 | Oant_4299 | hypothetical protein                                                                                       |
| √ | √ | VBIOchAnt73124_4482 | Oant_4302 | DNA-directed RNA polymerase specialized sigma subunit, sigma24-like                                        |
| √ |   | VBIOchAnt73124_4483 | Oant_4303 | hypothetical protein                                                                                       |
| √ | √ | VBIOchAnt73124_4485 | Oant_4305 | hypothetical protein                                                                                       |
| √ | √ | VBIOchAnt73124_4487 | Oant_4307 | cAMP-binding proteins - catabolite gene activator and regulatory subunit of cAMP-dependent protein kinases |
| √ |   | VBIOchAnt73124_4488 |           | hypothetical protein                                                                                       |
| √ | √ | VBIOchAnt73124_4490 | Oant_4311 | sensor histidine kinase/response regulator                                                                 |
| √ | √ | VBIOchAnt73124_4493 | Oant_4313 | DNA topoisomerase IB (poxvirus type)                                                                       |
| √ | √ | VBIOchAnt73124_4494 | Oant_4314 | Ku domain protein                                                                                          |
| √ | √ | VBIOchAnt73124_4495 | Oant_4315 | ATP-dependent DNA ligase clustered with Ku protein, LigD                                                   |
| √ | √ | VBIOchAnt73124_4496 | Oant_4316 | Ku domain protein                                                                                          |
| √ | √ | VBIOchAnt73124_4522 | Oant_4348 | 2-hydroxychromene-2-carboxylate isomerase                                                                  |
| √ | √ | VBIOchAnt73124_4523 | Oant_4349 | Periplasmic binding protein                                                                                |
| √ |   | VBIOchAnt73124_4524 | Oant_4350 | Periplasmic binding protein                                                                                |

|   |     |                     |           |                                                                                                                         |
|---|-----|---------------------|-----------|-------------------------------------------------------------------------------------------------------------------------|
| ✓ | ✓   | VBIOchAnt73124_4526 | Oant_4352 | Acetyltransferase                                                                                                       |
| ✓ | ✓   | VBIOchAnt73124_4527 | Oant_4353 | Peptidase M20D, amidohydrolase                                                                                          |
| ✓ | ✓   | VBIOchAnt73124_4528 | Oant_4354 | Nitrilotriacetate monooxygenase component A                                                                             |
| ✓ |     | VBIOchAnt73124_4529 | Oant_4355 | hypothetical protein                                                                                                    |
| ✓ | ✓ ✓ | VBIOchAnt73124_4531 | Oant_4357 | 4-hydroxyphenylacetate 3-monooxygenase, reductase component                                                             |
| ✓ | ✓   | VBIOchAnt73124_4532 | Oant_4358 | Coenzyme F420-dependent N5,N10-methylene tetrahydromethanopterin reductase and related flavin-dependent oxidoreductases |
| ✓ |     | VBIOchAnt73124_4533 | Oant_4359 | probable acetyltransferase protein                                                                                      |
| ✓ | ✓   | VBIOchAnt73124_4534 | Oant_4360 | Bacterial luciferase family protein YtmO, in cluster with L-cystine ABC transporter                                     |
| ✓ |     | VBIOchAnt73124_4535 | Oant_4361 | hypothetical protein                                                                                                    |
| ✓ |     | VBIOchAnt73124_4536 | Oant_4362 | hypothetical protein                                                                                                    |
| ✓ |     | VBIOchAnt73124_4537 | Oant_4363 | N-acylamino acid racemase                                                                                               |
| ✓ | ✓   | VBIOchAnt73124_4538 | Oant_4364 | hypothetical protein                                                                                                    |
| ✓ |     | VBIOchAnt73124_4539 | Oant_4365 | Amino acid ABC transporter, periplasmic amino acid-binding protein                                                      |
| ✓ |     | VBIOchAnt73124_4540 | Oant_4366 | Transcriptional activator ampR family                                                                                   |
| ✓ |     | VBIOchAnt73124_4581 | Oant_4405 | Dipeptide-binding ABC transporter, periplasmic substrate-binding component (TC 3.A.1.5.2)                               |
| ✓ |     | VBIOchAnt73124_4582 | Oant_4406 | Tripeptide aminopeptidase                                                                                               |
| ✓ | ✓ ✓ | VBIOchAnt73124_4583 | Oant_4407 | Gamma-glutamyltranspeptidase                                                                                            |
| ✓ | ✓ ✓ | VBIOchAnt73124_4596 | Oant_4419 | Hydantoin racemase                                                                                                      |
| ✓ | ✓   | VBIOchAnt73124_4603 | Oant_4426 | Quinate/shikimate 5-dehydrogenase I delta                                                                               |
| ✓ | ✓   | VBIOchAnt73124_4604 | Oant_4427 | Transcriptional regulator, TetR family                                                                                  |
| ✓ | ✓ ✓ | VBIOchAnt73124_4605 | Oant_4428 | 4-hydroxyphenylpyruvate dioxygenase                                                                                     |
| ✓ | ✓   | VBIOchAnt73124_4606 | Oant_4429 | TRAP-type C4-dicarboxylate transport system, periplasmic component                                                      |
| ✓ |     | VBIOchAnt73124_4607 | Oant_4430 | TRAP-type C4-dicarboxylate transport system, large permease component                                                   |
| ✓ |     | VBIOchAnt73124_4608 | Oant_4431 | TRAP-type transport system, small permease component, predicted N-acetylneuraminase transporter                         |
| ✓ |     | VBIOchAnt73124_4610 | Oant_4433 | Spermidine/putrescine-binding periplasmic protein                                                                       |
| ✓ | ✓   | VBIOchAnt73124_4611 | Oant_4434 | Sarcosine oxidase beta subunit                                                                                          |
| ✓ | ✓ ✓ | VBIOchAnt73124_4612 | Oant_4435 | Opine oxidase subunit A                                                                                                 |
| ✓ | ✓   | VBIOchAnt73124_4613 | Oant_4436 | hypothetical protein                                                                                                    |
| ✓ | ✓ ✓ | VBIOchAnt73124_4614 | Oant_4437 | ABC-type spermidine/putrescine transport system, permease component II                                                  |
| ✓ |     | VBIOchAnt73124_4615 | Oant_4438 | ABC-type spermidine/putrescine transport system, permease component I                                                   |
| ✓ |     | VBIOchAnt73124_4616 | Oant_4439 | ABC-type spermidine/putrescine transport systems, ATPase components                                                     |
| ✓ | ✓   | VBIOchAnt73124_4625 | Oant_4448 | putative exported protein                                                                                               |
| ✓ | ✓ ✓ | VBIOchAnt73124_4626 | Oant_4449 | Putative phosphatase                                                                                                    |
| ✓ | ✓ ✓ | VBIOchAnt73124_4627 | Oant_4451 | major facilitator superfamily MFS_1                                                                                     |
| ✓ |     | VBIOchAnt73124_4628 | Oant_4452 | Adenosylcobinamide amidohydrolase                                                                                       |
| ✓ | ✓   | VBIOchAnt73124_4658 | Oant_4484 | 3-oxoacyl-[acyl-carrier protein] reductase                                                                              |
| ✓ | ✓ ✓ | VBIOchAnt73124_4681 | Oant_4508 | D-alanine aminotransferase                                                                                              |

|   |   |                     |                     |                                                                                            |
|---|---|---------------------|---------------------|--------------------------------------------------------------------------------------------|
| √ | √ | VBIOchAnt73124_4783 | Oant_4611           | Oligopeptide/dipeptide ABC transporter, ATP-binding protein                                |
| √ | √ | VBIOchAnt73124_4784 | Oant_4612           | Oligopeptide transport ATP-binding protein OppD (TC 3.A.1.5.1)                             |
| √ | √ | √                   | VBIOchAnt73124_4788 | Oligopeptide ABC transporter, periplasmic oligopeptide-binding protein OppA (TC 3.A.1.5.1) |
| √ | √ | VBIOchAnt73124_4789 | Oant_4616           | putative LysR-family transcriptional regulator                                             |
| √ |   | VBIOchAnt73124_4806 | Oant_4634           | hypothetical protein                                                                       |
| √ | √ | VBIOchAnt73124_4807 | Oant_4635           | Small heat shock protein                                                                   |
| √ | √ | √                   | VBIOchAnt73124_4808 | Small heat shock protein                                                                   |
| √ | √ | √                   | VBIOchAnt73124_4820 | hypothetical protein                                                                       |
| √ | √ | √                   | VBIOchAnt73124_4824 | Transcriptional regulator, HxLR family                                                     |
| √ | √ | √                   | VBIOchAnt73124_4862 | signal transduction histidine kinase                                                       |
| √ | √ | VBIOchAnt73124_4876 | Oant_4795           | Dipeptide transport system permease protein DppB (TC 3.A.1.5.2)                            |
| √ |   | VBIOchAnt73124_4882 | Oant_4800           | Catalase                                                                                   |
| √ | √ | VBIOchAnt73124_4908 | Oant_4642           | IS426 transposase                                                                          |
| √ | √ | VBIOchAnt73124_4909 | Oant_4643           | IS426 transposase                                                                          |
| √ | √ | VBIOchAnt73124_4922 | Oant_4656           | Lead, cadmium, zinc and mercury transporting ATPase; Copper-translocating P-type ATPase    |
| √ | √ | √                   | VBIOchAnt73124_4952 | Sigma-fimbriae chaperone protein                                                           |
| √ | √ | √                   | VBIOchAnt73124_4953 | Sigma-fimbriae tip adhesin                                                                 |
| √ | √ | VBIOchAnt73124_4958 | Oant_4695           | ABC-type amino acid transport system, permease component                                   |
| √ | √ | √                   | VBIOchAnt73124_4960 | Aldehyde dehydrogenase                                                                     |
| √ | √ | VBIOchAnt73124_4980 | Oant_4719           | protein of unknown function DUF1612                                                        |
| √ | √ | VBIOchAnt73124_4984 | Oant_4725           | putative transposase                                                                       |
| √ | √ | VBIOchAnt73124_4990 | Oant_4827           | Putative oxidoreductase                                                                    |
| √ |   | VBIOchAnt73124_5000 | Oant_4837           | Amino acid ABC transporter, ATP-binding protein                                            |
| √ | √ | VBIOchAnt73124_5001 | Oant_4838           | ABC-type amino acid transport system, permease component                                   |
| √ | √ | √                   | VBIOchAnt73124_5005 | hypothetical protein                                                                       |
| √ |   | VBIOchAnt73124_5007 | Oant_4845           | hypothetical protein                                                                       |
| √ |   | VBIOchAnt73124_5008 | Oant_4846           | Inter-alpha-trypsin inhibitor domain protein                                               |
| √ |   | VBIOchAnt73124_5009 | Oant_4847           | LPXTG-site transpeptidase family protein                                                   |

**Table S3. Comparison of metabolic reconstruction of *Ochrobactrum anthropi* and *Brucella suis* 1330.**

| Category                     | Subcategory | Subsystem                      | Role                                                                                     | <i>O. anthropi</i> Features<br>PubSeed locus tags                                                                            | <i>B. suis</i> 1330<br>Features PubSeed<br>locus tags                   |                       |
|------------------------------|-------------|--------------------------------|------------------------------------------------------------------------------------------|------------------------------------------------------------------------------------------------------------------------------|-------------------------------------------------------------------------|-----------------------|
| Alanine, serine, and glycine |             | Alanine biosynthesis           | Alanine racemase (EC 5.1.1.1)                                                            | fig 439375.7.peg.1514                                                                                                        | fig 204722.5.peg.3140                                                   |                       |
|                              |             |                                | Branched-chain amino acid aminotransferase (EC 2.6.1.42)                                 | fig 439375.7.peg.1734,<br>fig 439375.7.peg.3936                                                                              | fig 204722.5.peg.2880,<br>fig 204722.5.peg.2881                         |                       |
|                              |             |                                | Cysteine desulfurase (EC 2.8.1.7)                                                        | fig 439375.7.peg.2375,<br>fig 439375.7.peg.4198                                                                              | fig 204722.5.peg.945                                                    |                       |
|                              |             |                                | Cysteine desulfurase (EC 2.8.1.7), SufS subfamily                                        | fig 439375.7.peg.2370                                                                                                        | fig 204722.5.peg.949                                                    |                       |
|                              |             | Glycine and Serine Utilization | Aminomethyltransferase (glycine cleavage system T protein) (EC 2.1.2.10)                 | fig 439375.7.peg.4031                                                                                                        | fig 204722.5.peg.2942                                                   |                       |
|                              |             |                                | Cystathionine gamma-lyase (EC 4.4.1.1)                                                   | fig 439375.7.peg.4548                                                                                                        |                                                                         |                       |
|                              |             |                                |                                                                                          | fig 439375.7.peg.10,<br>fig 439375.7.peg.1286,<br>fig 439375.7.peg.1445,<br>fig 439375.7.peg.3254,<br>fig 439375.7.peg.3908, | fig 204722.5.peg.6,<br>fig 204722.5.peg.1712,<br>fig 204722.5.peg.2671, |                       |
|                              |             |                                | D-3-phosphoglycerate dehydrogenase (EC 1.1.1.95)                                         | fig 439375.7.peg.4999                                                                                                        | fig 204722.5.peg.3205                                                   |                       |
|                              |             |                                | D-serine dehydratase transcriptional activator                                           | fig 439375.7.peg.3514                                                                                                        |                                                                         |                       |
|                              |             |                                | D-serine/D-alanine/glycine transporter                                                   | fig 439375.7.peg.4448                                                                                                        | fig 204722.5.peg.2276                                                   |                       |
|                              |             |                                | Glycine cleavage system H protein                                                        | fig 439375.7.peg.4030                                                                                                        | fig 204722.5.peg.2941                                                   |                       |
|                              |             |                                | Glycine dehydrogenase [decarboxylating] (glycine cleavage system P protein) (EC 1.4.4.2) | fig 439375.7.peg.4029                                                                                                        | fig 204722.5.peg.2940                                                   |                       |
|                              |             |                                | L-serine dehydratase (EC 4.3.1.17)                                                       | fig 439375.7.peg.2120                                                                                                        | fig 204722.5.peg.1194                                                   |                       |
|                              |             |                                | Phosphoserine aminotransferase (EC 2.6.1.52)                                             | fig 439375.7.peg.1285                                                                                                        | fig 204722.5.peg.1714                                                   |                       |
|                              |             |                                | Phosphoserine phosphatase (EC 3.1.3.3)                                                   | fig 439375.7.peg.1901                                                                                                        | fig 204722.5.peg.1417                                                   |                       |
|                              |             |                                | Serine hydroxymethyltransferase (EC 2.1.2.1)                                             | fig 439375.7.peg.2664                                                                                                        | fig 204722.5.peg.776                                                    |                       |
|                              |             |                                | Seryl-tRNA synthetase (EC 6.1.1.11)                                                      | fig 439375.7.peg.2472                                                                                                        | fig 204722.5.peg.896                                                    |                       |
|                              |             |                                | Threonine dehydratase, catabolic (EC 4.3.1.19)                                           | fig 439375.7.peg.1908,<br>fig 439375.7.peg.3628                                                                              |                                                                         |                       |
|                              |             |                                | Glycine Biosynthesis                                                                     | Low-specificity L-threonine aldolase (EC 4.1.2.5)                                                                            | fig 439375.7.peg.4452                                                   | fig 204722.5.peg.2273 |
|                              |             |                                |                                                                                          | Serine hydroxymethyltransferase (EC 2.1.2.1)                                                                                 | fig 439375.7.peg.2664                                                   | fig 204722.5.peg.776  |
|                              |             | Glycine cleavage system        | Aminomethyltransferase (glycine cleavage system T protein) (EC 2.1.2.10)                 | fig 439375.7.peg.4031                                                                                                        | fig 204722.5.peg.2942                                                   |                       |
|                              |             |                                | Glycine cleavage system H protein                                                        | fig 439375.7.peg.4030                                                                                                        | fig 204722.5.peg.2941                                                   |                       |
|                              |             |                                |                                                                                          | fig 439375.7.peg.2705,<br>fig 439375.7.peg.4123,                                                                             |                                                                         |                       |
|                              |             |                                | Glycine cleavage system transcriptional activator GcvA                                   | fig 439375.7.peg.4254                                                                                                        |                                                                         |                       |
|                              |             | Serine Biosynthesis            | Glycine dehydrogenase [decarboxylating] (glycine cleavage system P protein) (EC 1.4.4.2) | fig 439375.7.peg.4029                                                                                                        | fig 204722.5.peg.2940                                                   |                       |
|                              |             |                                |                                                                                          | fig 439375.7.peg.10,<br>fig 439375.7.peg.1286,<br>fig 439375.7.peg.1445,<br>fig 439375.7.peg.3254,<br>fig 439375.7.peg.3908, | fig 204722.5.peg.6,<br>fig 204722.5.peg.1712,<br>fig 204722.5.peg.2671, |                       |
|                              |             |                                | D-3-phosphoglycerate dehydrogenase (EC 1.1.1.95)                                         | fig 439375.7.peg.4999                                                                                                        | fig 204722.5.peg.3205                                                   |                       |
|                              |             |                                | Phosphoserine aminotransferase (EC 2.6.1.52)                                             | fig 439375.7.peg.1285                                                                                                        | fig 204722.5.peg.1714                                                   |                       |

|                                             |                                                                                |                                                                                                     |                                                                          |                                                 |
|---------------------------------------------|--------------------------------------------------------------------------------|-----------------------------------------------------------------------------------------------------|--------------------------------------------------------------------------|-------------------------------------------------|
|                                             |                                                                                | Phosphoserine phosphatase (EC 3.1.3.3)                                                              | fig 439375.7.peg.1901                                                    | fig 204722.5.peg.1417                           |
|                                             |                                                                                | Serine hydroxymethyltransferase (EC 2.1.2.1)                                                        | fig 439375.7.peg.2664                                                    | fig 204722.5.peg.776                            |
| <b>Amino Acids and Derivatives</b>          | Creatine and Creatinine Degradation                                            | Creatinine amidohydrolase (EC 3.5.2.10)                                                             | fig 439375.7.peg.1442,<br>fig 439375.7.peg.4037                          | fig 204722.5.peg.3210                           |
|                                             |                                                                                | Cytosine deaminase (EC 3.5.4.1)                                                                     | fig 439375.7.peg.3466,<br>fig 439375.7.peg.4040                          |                                                 |
|                                             |                                                                                | N-methylhydantoinase A (EC 3.5.2.14)                                                                | fig 439375.7.peg.4751                                                    |                                                 |
|                                             |                                                                                | N-methylhydantoinase B (EC 3.5.2.14)                                                                | fig 439375.7.peg.4752                                                    |                                                 |
|                                             | L-2-amino-thiazoline-4-carboxylic acid<br>Lcysteine conversion                 | Beta-ureidopropionase (EC 3.5.1.6)                                                                  | fig 439375.7.peg.371                                                     | fig 204722.5.peg.292                            |
|                                             |                                                                                | L-2-amino-thiazoline-4-carboxylic acid hydrolase (EC 3.5.2.-)                                       | fig 439375.7.peg.3470                                                    |                                                 |
| Arginine and Ornithine Degradation          | Agmatinase (EC 3.5.3.11)                                                       | fig 439375.7.peg.2632,<br>fig 439375.7.peg.4682                                                     | fig 204722.5.peg.799                                                     |                                                 |
|                                             | Agmatine deiminase (EC 3.5.3.12)                                               | fig 439375.7.peg.1096                                                                               |                                                                          |                                                 |
|                                             | Arginase (EC 3.5.3.1)                                                          | fig 439375.7.peg.1541                                                                               | fig 204722.5.peg.3118                                                    |                                                 |
|                                             | Arginine ABC transporter, permease protein ArtQ                                | fig 439375.7.peg.2351                                                                               | fig 204722.5.peg.967                                                     |                                                 |
|                                             | Arginine decarboxylase (EC 4.1.1.19)                                           | fig 439375.7.peg.4417                                                                               | fig 204722.5.peg.2320                                                    |                                                 |
|                                             | Arginine deiminase (EC 3.5.3.6)                                                | fig 439375.7.peg.4912                                                                               |                                                                          |                                                 |
|                                             | Arginine utilization protein RocB                                              | fig 439375.7.peg.3657                                                                               |                                                                          |                                                 |
|                                             | Arginine/ornithine antiporter ArcD                                             | fig 439375.7.peg.4911                                                                               |                                                                          |                                                 |
|                                             | Carbamate kinase (EC 2.7.2.2)                                                  | fig 439375.7.peg.4914                                                                               |                                                                          |                                                 |
|                                             | Delta-1-pyrroline-5-carboxylate dehydrogenase (EC 1.5.1.12)                    | fig 439375.7.peg.4014                                                                               | fig 204722.5.peg.2937                                                    |                                                 |
|                                             | Histidine ABC transporter, ATP-binding protein HisP (TC 3.A.1.3.1)             | fig 439375.7.peg.3679                                                                               | fig 204722.5.peg.2937                                                    |                                                 |
|                                             | Lysine-arginine-ornithine-binding periplasmic protein precursor (TC 3.A.1.3.1) | fig 439375.7.peg.2942                                                                               |                                                                          |                                                 |
|                                             | NADP-specific glutamate dehydrogenase (EC 1.4.1.4)                             | fig 439375.7.peg.4768                                                                               | fig 204722.5.peg.234                                                     |                                                 |
|                                             | Ornithine aminotransferase (EC 2.6.1.13)                                       | fig 439375.7.peg.3118                                                                               | fig 204722.5.peg.3067                                                    |                                                 |
|                                             | Ornithine carbamoyltransferase (EC 2.1.3.3)                                    | fig 439375.7.peg.421,<br>fig 439375.7.peg.4913                                                      | fig 204722.5.peg.315                                                     |                                                 |
|                                             | Ornithine cyclodeaminase (EC 4.3.1.12)                                         | fig 439375.7.peg.1542,<br>fig 439375.7.peg.3627,<br>fig 439375.7.peg.4765,<br>fig 439375.7.peg.4789 | fig 204722.5.peg.3117                                                    |                                                 |
|                                             | Ornithine decarboxylase (EC 4.1.1.17)                                          | fig 439375.7.peg.4417                                                                               | fig 204722.5.peg.2320                                                    |                                                 |
|                                             | Succinylornithine transaminase (EC 2.6.1.81)                                   | fig 439375.7.peg.3118                                                                               | fig 204722.5.peg.3067                                                    |                                                 |
|                                             | Arginine Biosynthesis extended                                                 | Acetylglutamate kinase (EC 2.7.2.8)                                                                 | fig 439375.7.peg.1424,<br>fig 439375.7.peg.3451                          | fig 204722.5.peg.3102,<br>fig 204722.5.peg.3250 |
|                                             |                                                                                | Acetylornithine aminotransferase (EC 2.6.1.11)                                                      | fig 439375.7.peg.420,<br>fig 439375.7.peg.3118,<br>fig 439375.7.peg.4667 | fig 204722.5.peg.314,<br>fig 204722.5.peg.3067  |
|                                             |                                                                                | Acetylornithine deacetylase (EC 3.5.1.16)                                                           | fig 439375.7.peg.4681                                                    |                                                 |
| Argininosuccinate lyase (EC 4.3.2.1)        |                                                                                | fig 439375.7.peg.1047,<br>fig 439375.7.peg.2613                                                     | fig 204722.5.peg.2018                                                    |                                                 |
| Argininosuccinate synthase (EC 6.3.4.5)     |                                                                                | fig 439375.7.peg.88                                                                                 | fig 204722.5.peg.77                                                      |                                                 |
| Glutamate N-acetyltransferase (EC 2.3.1.35) |                                                                                | fig 439375.7.peg.1073                                                                               | fig 204722.5.peg.1975                                                    |                                                 |

**Arginine; urea cycle,  
polyamines**

|                            |                                                                                         |                                                                                                                                                         |                                                                           |
|----------------------------|-----------------------------------------------------------------------------------------|---------------------------------------------------------------------------------------------------------------------------------------------------------|---------------------------------------------------------------------------|
|                            | N-acetyl-gamma-glutamyl-phosphate reductase (EC 1.2.1.38)                               | fig 439375.7.peg.2633                                                                                                                                   | fig 204722.5.peg.798                                                      |
|                            | N-acetylglutamate synthase (EC 2.3.1.1)                                                 | fig 439375.7.peg.1073                                                                                                                                   | fig 204722.5.peg.1975                                                     |
|                            | N-succinyl-L,L-diaminopimelate desuccinylase (EC 3.5.1.18)                              | fig 439375.7.peg.1415                                                                                                                                   | fig 204722.5.peg.3256                                                     |
|                            | Ornithine carbamoyltransferase (EC 2.1.3.3)                                             | fig 439375.7.peg.421,<br>fig 439375.7.peg.4913                                                                                                          | fig 204722.5.peg.315                                                      |
| Arginine Deiminase Pathway | Arginine deiminase (EC 3.5.3.6)                                                         | fig 439375.7.peg.4912                                                                                                                                   |                                                                           |
|                            | Arginine/ornithine antiporter ArcD                                                      | fig 439375.7.peg.4911                                                                                                                                   |                                                                           |
|                            | Carbamate kinase (EC 2.7.2.2)                                                           | fig 439375.7.peg.4914                                                                                                                                   |                                                                           |
|                            | Ornithine carbamoyltransferase (EC 2.1.3.3)                                             | fig 439375.7.peg.421,<br>fig 439375.7.peg.4913                                                                                                          | fig 204722.5.peg.315                                                      |
| Cyanophycin Metabolism     | Asparagine synthetase [glutamine-hydrolyzing] (EC 6.3.5.4)                              | fig 439375.7.peg.3112                                                                                                                                   |                                                                           |
|                            | Cyanophycin synthase (EC 6.3.2.29)(EC 6.3.2.30)                                         | fig 439375.7.peg.3113                                                                                                                                   |                                                                           |
|                            | Cyanophycinase 2 (EC 3.4.15.6)                                                          | fig 439375.7.peg.3106                                                                                                                                   |                                                                           |
| Polyamine Metabolism       | 4-aminobutyraldehyde dehydrogenase (EC 1.2.1.19)                                        | fig 439375.7.peg.2932                                                                                                                                   |                                                                           |
|                            | 5&#39;-methylthioadenosine nucleosidase (EC 3.2.2.16)                                   | fig 439375.7.peg.3208                                                                                                                                   | fig 204722.5.peg.2574                                                     |
|                            |                                                                                         | fig 439375.7.peg.2928,<br>fig 439375.7.peg.2944,<br>fig 439375.7.peg.3881,<br>fig 439375.7.peg.5015                                                     | fig 204722.5.peg.2542,<br>fig 204722.5.peg.3329,<br>fig 204722.5.peg.3330 |
|                            | ABC transporter, periplasmic spermidine putrescine-binding protein PotD (TC 3.A.1.11.1) | fig 439375.7.peg.2632,<br>fig 439375.7.peg.4682                                                                                                         | fig 204722.5.peg.799                                                      |
|                            | Agmatinase (EC 3.5.3.11)                                                                | fig 439375.7.peg.1096                                                                                                                                   |                                                                           |
|                            | Agmatine deiminase (EC 3.5.3.12)                                                        | fig 439375.7.peg.4417                                                                                                                                   | fig 204722.5.peg.2320                                                     |
|                            | Arginine decarboxylase (EC 4.1.1.19)                                                    | fig 439375.7.peg.4911                                                                                                                                   |                                                                           |
|                            | Arginine/ornithine antiporter ArcD                                                      | fig 439375.7.peg.4914                                                                                                                                   |                                                                           |
|                            | Carbamate kinase (EC 2.7.2.2)                                                           | fig 439375.7.peg.466                                                                                                                                    | fig 204722.5.peg.347                                                      |
|                            | Carboxynorspermidine decarboxylase, putative (EC 4.1.1.-)                               | fig 439375.7.peg.467                                                                                                                                    | fig 204722.5.peg.349                                                      |
|                            | Carboxynorspermidine dehydrogenase, putative (EC 1.1.1.-)                               | fig 439375.7.peg.4417                                                                                                                                   | fig 204722.5.peg.2320                                                     |
|                            | Ornithine decarboxylase (EC 4.1.1.17)                                                   |                                                                                                                                                         |                                                                           |
|                            | Putrescine ABC transporter putrescine-binding protein PotF (TC 3.A.1.11.2)              | fig 439375.7.peg.4100                                                                                                                                   | fig 204722.5.peg.1638                                                     |
|                            |                                                                                         | fig 439375.7.peg.1536,<br>fig 439375.7.peg.2929,<br>fig 439375.7.peg.2945,<br>fig 439375.7.peg.3737,<br>fig 439375.7.peg.3880,<br>fig 439375.7.peg.5016 | fig 204722.5.peg.2543,<br>fig 204722.5.peg.3333,<br>fig 204722.5.peg.3334 |
|                            | Putrescine transport ATP-binding protein PotA (TC 3.A.1.11.1)                           |                                                                                                                                                         | fig 204722.5.peg.1637,<br>fig 204722.5.peg.2901,<br>fig 204722.5.peg.2902 |
|                            | Putrescine transport ATP-binding protein PotG (TC 3.A.1.11.2)                           | fig 439375.7.peg.3981,<br>fig 439375.7.peg.4099                                                                                                         |                                                                           |
|                            | Putrescine transport system permease protein PotH (TC 3.A.1.11.2)                       | fig 439375.7.peg.4098                                                                                                                                   | fig 204722.5.peg.1636                                                     |
|                            | Putrescine transport system permease protein PotI (TC 3.A.1.11.2)                       | fig 439375.7.peg.4097                                                                                                                                   | fig 204722.5.peg.1635                                                     |
|                            |                                                                                         | fig 439375.7.peg.2930,<br>fig 439375.7.peg.2946,<br>fig 439375.7.peg.3879,<br>fig 439375.7.peg.4324,<br>fig 439375.7.peg.5014                           | fig 204722.5.peg.2544,<br>fig 204722.5.peg.3332                           |
|                            |                                                                                         | Spermidine Putrescine ABC transporter permease component PotB (TC 3.A.1.11.1)                                                                           |                                                                           |

|                                 |                                 |                                                                                                                                                                                      |                                                              |                       |
|---------------------------------|---------------------------------|--------------------------------------------------------------------------------------------------------------------------------------------------------------------------------------|--------------------------------------------------------------|-----------------------|
|                                 |                                 | fig 439375.7.peg.2931,<br>fig 439375.7.peg.2947,<br>Spermidine Putrescine ABC transporter permease<br>component potC (TC_3.A.1.11.1) fig 439375.7.peg.3878,<br>fig 439375.7.peg.5013 | fig 204722.5.peg.2545,<br>fig 204722.5.peg.3331              |                       |
| Putrescine utilization pathways |                                 | 4-aminobutyraldehyde dehydrogenase (EC 1.2.1.19) fig 439375.7.peg.2932                                                                                                               |                                                              |                       |
|                                 |                                 | Gamma-aminobutyrate:alpha-ketoglutarate<br>aminotransferase (EC 2.6.1.19) fig 439375.7.peg.3631                                                                                      |                                                              |                       |
|                                 |                                 | Putrescine utilization regulator fig 439375.7.peg.1512                                                                                                                               |                                                              |                       |
|                                 |                                 | Eukaryotic-type low-affinity urea transporter fig 439375.7.peg.2575                                                                                                                  | fig 204722.5.peg.1385                                        |                       |
| Urea decomposition              |                                 | HupE-UreJ family metal transporter fig 439375.7.peg.355,<br>fig 439375.7.peg.2573                                                                                                    |                                                              |                       |
|                                 |                                 | Urea ABC transporter, ATPase protein UrtD fig 439375.7.peg.4175,<br>fig 439375.7.peg.4574                                                                                            |                                                              |                       |
|                                 |                                 | Urease accessory protein UreD fig 439375.7.peg.353,<br>fig 439375.7.peg.2579                                                                                                         | fig 204722.5.peg.280,<br>fig 204722.5.peg.1384               |                       |
|                                 |                                 | Urease accessory protein UreE fig 439375.7.peg.358                                                                                                                                   | fig 204722.5.peg.285,<br>fig 204722.5.peg.1381               |                       |
|                                 |                                 | Urease accessory protein Uref fig 439375.7.peg.359,<br>fig 439375.7.peg.2574                                                                                                         | fig 204722.5.peg.286,<br>fig 204722.5.peg.1382               |                       |
|                                 |                                 | Urease accessory protein UreG fig 439375.7.peg.360                                                                                                                                   | fig 204722.5.peg.287,<br>fig 204722.5.peg.1383               |                       |
|                                 |                                 | Urease alpha subunit (EC 3.5.1.5) fig 439375.7.peg.357,<br>fig 439375.7.peg.2576                                                                                                     | fig 204722.5.peg.284,<br>fig 204722.5.peg.1380               |                       |
|                                 |                                 | Urease beta subunit (EC 3.5.1.5) fig 439375.7.peg.356,<br>fig 439375.7.peg.2577                                                                                                      | fig 204722.5.peg.283,<br>fig 204722.5.peg.1379               |                       |
|                                 |                                 | Urease gamma subunit (EC 3.5.1.5) fig 439375.7.peg.354,<br>fig 439375.7.peg.2578                                                                                                     | fig 204722.5.peg.281,<br>fig 204722.5.peg.1378               |                       |
|                                 | Aromatic amino acid degradation |                                                                                                                                                                                      | 2,4-dihydroxyhept-2-ene-1,7-dioic acid aldolase (EC 4.1.2.-) | fig 204722.5.peg.3387 |
|                                 |                                 |                                                                                                                                                                                      | 2-hydroxyhepta-2,4-diene-1,7-dioate isomerase (EC 5.3.3.-)   | fig 204722.5.peg.3389 |
|                                 |                                 |                                                                                                                                                                                      | 2-oxo-hepta-3-ene-1,7-dioic acid hydratase (EC 4.2.-.-)      | fig 204722.5.peg.3388 |
|                                 |                                 | 5-carboxymethyl-2-hydroxymuconate delta-isomerase (EC 5.3.3.10)                                                                                                                      | fig 204722.5.peg.3393                                        |                       |
|                                 |                                 | 5-carboxymethyl-2-hydroxymuconate semialdehyde<br>dehydrogenase (EC 1.2.1.60)                                                                                                        | fig 204722.5.peg.3392                                        |                       |
|                                 |                                 | 5-carboxymethyl-2-oxo-hex-3- ene-1,7-dioate decarboxylase<br>(EC 4.1.1.68)                                                                                                           | fig 204722.5.peg.3389                                        |                       |
|                                 |                                 | Homoprotocatechuate degradative operon repressor                                                                                                                                     | fig 204722.5.peg.3394                                        |                       |
| Chorismate Synthesis            |                                 | 2-keto-3-deoxy-D-arabino-heptulosonate-7-phosphate<br>synthase II (EC 2.5.1.54) fig 439375.7.peg.2201                                                                                | fig 204722.5.peg.1024                                        |                       |
|                                 |                                 | 3-dehydroquinate dehydratase II (EC 4.2.1.10) fig 439375.7.peg.2392                                                                                                                  | fig 204722.5.peg.922                                         |                       |
|                                 |                                 | 3-dehydroquinate synthase (EC 4.2.3.4) fig 439375.7.peg.952                                                                                                                          | fig 204722.5.peg.2063                                        |                       |
|                                 |                                 | 5-Enolpyruvylshikimate-3-phosphate synthase (EC 2.5.1.19) fig 439375.7.peg.32                                                                                                        | fig 204722.5.peg.28                                          |                       |
|                                 |                                 | Chorismate mutase I (EC 5.4.99.5) fig 439375.7.peg.1127                                                                                                                              | fig 204722.5.peg.1855                                        |                       |
|                                 |                                 | Chorismate synthase (EC 4.2.3.5) fig 439375.7.peg.576                                                                                                                                | fig 204722.5.peg.443                                         |                       |
|                                 |                                 | Cyclohexadienyl dehydrogenase (EC 1.3.1.12)(EC 1.3.1.43) fig 439375.7.peg.1040                                                                                                       | fig 204722.5.peg.2025                                        |                       |
|                                 |                                 | Prephenate and/or arogenate dehydrogenase (unknown<br>specificity) (EC 1.3.1.12)(EC 1.3.1.43) fig 439375.7.peg.4115                                                                  |                                                              |                       |
|                                 |                                 | Prephenate dehydratase (EC 4.2.1.51) fig 439375.7.peg.18                                                                                                                             | fig 204722.5.peg.41                                          |                       |
|                                 |                                 | Quinate/shikimate 5-dehydrogenase I delta (EC 1.1.1.25) fig 439375.7.peg.4603                                                                                                        |                                                              |                       |

**Aromatic amino acids and derivatives**

|                                                                                                                 |                                                                                            |                                                                     |                                                                     |
|-----------------------------------------------------------------------------------------------------------------|--------------------------------------------------------------------------------------------|---------------------------------------------------------------------|---------------------------------------------------------------------|
|                                                                                                                 |                                                                                            |                                                                     | fig 204722.5.p.2104,<br>fig 204722.5.p.2256,<br>fig 204722.5.p.2610 |
|                                                                                                                 | Shikimate 5-dehydrogenase I alpha (EC 1.1.1.25)                                            | fig 439375.7.p.896                                                  | fig 204722.5.p.2610                                                 |
|                                                                                                                 | Shikimate kinase I (EC 2.7.1.71)                                                           | fig 439375.7.p.951                                                  | fig 204722.5.p.2064                                                 |
| Chorismate: Intermediate for synthesis of PAPA antibiotics, PABA, anthranilate, 3-hydroxyanthranilate and more. | Aminodeoxychorismate lyase (EC 4.1.3.38)                                                   | fig 439375.7.p.4435                                                 | fig 204722.5.p.2299                                                 |
|                                                                                                                 | Anthranilate synthase, amidotransferase component (EC 4.1.3.27)                            | fig 439375.7.p.1682                                                 | fig 204722.5.p.1596                                                 |
|                                                                                                                 | Anthranilate synthase, aminase component (EC 4.1.3.27)                                     | fig 439375.7.p.1682                                                 | fig 204722.5.p.1596                                                 |
|                                                                                                                 | Isochorismatase (EC 3.3.2.1) of siderophore biosynthesis                                   |                                                                     | fig 204722.5.p.2236                                                 |
|                                                                                                                 | Isochorismate synthase (EC 5.4.4.2) of siderophore biosynthesis                            |                                                                     | fig 204722.5.p.2238                                                 |
|                                                                                                                 | Para-aminobenzoate synthase, amidotransferase component (EC 2.6.1.85)                      | fig 439375.7.p.1682                                                 | fig 204722.5.p.1596                                                 |
|                                                                                                                 | Para-aminobenzoate synthase, aminase component (EC 2.6.1.85)                               | fig 439375.7.p.4434                                                 | fig 204722.5.p.2300                                                 |
|                                                                                                                 |                                                                                            |                                                                     |                                                                     |
| Common Pathway For Synthesis of Aromatic Compounds (DAHP synthase to chorismate)                                | 2-keto-3-deoxy-D-arabino-heptulosonate-7-phosphate synthase II (EC 2.5.1.54)               | fig 439375.7.p.2201                                                 | fig 204722.5.p.1024                                                 |
|                                                                                                                 | 3-dehydroquinate dehydratase II (EC 4.2.1.10)                                              | fig 439375.7.p.2392                                                 | fig 204722.5.p.922                                                  |
|                                                                                                                 | 3-dehydroquinate synthase (EC 4.2.3.4)                                                     | fig 439375.7.p.952                                                  | fig 204722.5.p.2063                                                 |
|                                                                                                                 | 5-Enolpyruvylshikimate-3-phosphate synthase (EC 2.5.1.19)                                  | fig 439375.7.p.32                                                   | fig 204722.5.p.28                                                   |
|                                                                                                                 | Chorismate synthase (EC 4.2.3.5)                                                           | fig 439375.7.p.576                                                  | fig 204722.5.p.443                                                  |
|                                                                                                                 | Quinate/shikimate 5-dehydrogenase I delta (EC 1.1.1.25)                                    | fig 439375.7.p.4603                                                 |                                                                     |
|                                                                                                                 |                                                                                            |                                                                     | fig 204722.5.p.2104,<br>fig 204722.5.p.2256,<br>fig 204722.5.p.2610 |
|                                                                                                                 | Shikimate kinase I (EC 2.7.1.71)                                                           | fig 439375.7.p.951                                                  | fig 204722.5.p.2064                                                 |
| Phenylalanine and Tyrosine Branches from Chorismate                                                             |                                                                                            | fig 439375.7.p.1041,<br>fig 439375.7.p.2792,<br>fig 439375.7.p.3735 | fig 204722.5.p.651,<br>fig 204722.5.p.2024                          |
|                                                                                                                 | Biosynthetic Aromatic amino acid aminotransferase beta (EC 2.6.1.57)                       | fig 439375.7.p.1127                                                 | fig 204722.5.p.1855                                                 |
|                                                                                                                 | Chorismate mutase I (EC 5.4.99.5)                                                          | fig 439375.7.p.1040                                                 | fig 204722.5.p.2025                                                 |
|                                                                                                                 | Cyclohexadienyl dehydrogenase (EC 1.3.1.12)(EC 1.3.1.43)                                   |                                                                     |                                                                     |
|                                                                                                                 | Prephenate and/or arogenate dehydrogenase (unknown specificity) (EC 1.3.1.12)(EC 1.3.1.43) | fig 439375.7.p.4115                                                 |                                                                     |
|                                                                                                                 | Prephenate dehydratase (EC 4.2.1.51)                                                       | fig 439375.7.p.18                                                   | fig 204722.5.p.41                                                   |
| Tryptophan synthesis                                                                                            | Anthranilate phosphoribosyltransferase (EC 2.4.2.18)                                       | fig 439375.7.p.2154                                                 | fig 204722.5.p.1160                                                 |
|                                                                                                                 | Anthranilate synthase, amidotransferase component (EC 4.1.3.27)                            | fig 439375.7.p.1682                                                 | fig 204722.5.p.1596                                                 |
|                                                                                                                 | Anthranilate synthase, aminase component (EC 4.1.3.27)                                     | fig 439375.7.p.1682                                                 | fig 204722.5.p.1596                                                 |
|                                                                                                                 | Indole-3-glycerol phosphate synthase (EC 4.1.1.48)                                         | fig 439375.7.p.2153                                                 | fig 204722.5.p.1161                                                 |
|                                                                                                                 | Para-aminobenzoate synthase, amidotransferase component (EC 2.6.1.85)                      | fig 439375.7.p.1682                                                 | fig 204722.5.p.1596                                                 |
|                                                                                                                 | Phosphoribosylanthranilate isomerase (EC 5.3.1.24)                                         | fig 439375.7.p.854                                                  | fig 204722.5.p.2148                                                 |
|                                                                                                                 | Tryptophan synthase alpha chain (EC 4.2.1.20)                                              | fig 439375.7.p.857                                                  | fig 204722.5.p.2145                                                 |
|                                                                                                                 | Tryptophan synthase beta chain (EC 4.2.1.20)                                               | fig 439375.7.p.855                                                  | fig 204722.5.p.2147                                                 |
|                                                                                                                 |                                                                                            |                                                                     |                                                                     |
|                                                                                                                 | (R)-citramalate synthase (EC 2.3.1.182)                                                    | fig 439375.7.p.2750                                                 | fig 204722.5.p.691                                                  |
|                                                                                                                 | 2-isopropylmalate synthase (EC 2.3.3.13)                                                   | fig 439375.7.p.1686                                                 | fig 204722.5.p.1593                                                 |
|                                                                                                                 | 3-isopropylmalate dehydratase large subunit (EC 4.2.1.33)                                  | fig 439375.7.p.992                                                  | fig 204722.5.p.1940                                                 |
|                                                                                                                 | 3-isopropylmalate dehydratase small subunit (EC 4.2.1.33)                                  | fig 439375.7.p.3452                                                 | fig 204722.5.p.3101                                                 |
|                                                                                                                 | 3-isopropylmalate dehydrogenase (EC 1.1.1.85)                                              | fig 439375.7.p.3441                                                 | fig 204722.5.p.3109                                                 |

Amino Acids and Derivatives

|                                                                                      |                                                                                                                                            |                                                                                            |                                                                                                                   |
|--------------------------------------------------------------------------------------|--------------------------------------------------------------------------------------------------------------------------------------------|--------------------------------------------------------------------------------------------|-------------------------------------------------------------------------------------------------------------------|
| Branched-Chain Amino Acid Biosynthesis                                               | Acetolactate synthase large subunit (EC 2.2.1.6)                                                                                           | fig 439375.7.peg.1905                                                                      | fig 204722.5.peg.1414                                                                                             |
|                                                                                      | Acetolactate synthase small subunit (EC 2.2.1.6)                                                                                           | fig 439375.7.peg.1906                                                                      | fig 204722.5.peg.1413                                                                                             |
|                                                                                      | Branched-chain amino acid aminotransferase (EC 2.6.1.42)                                                                                   | fig 439375.7.peg.1734, fig 439375.7.peg.3936                                               | fig 204722.5.peg.2880, fig 204722.5.peg.2881                                                                      |
|                                                                                      | Dihydroxy-acid dehydratase (EC 4.2.1.9)                                                                                                    | fig 439375.7.peg.119                                                                       | fig 204722.5.peg.101                                                                                              |
|                                                                                      | Ketol-acid reductoisomerase (EC 1.1.1.86)                                                                                                  | fig 439375.7.peg.1914                                                                      | fig 204722.5.peg.1405                                                                                             |
|                                                                                      | Leucine-responsive regulatory protein, regulator for leucine (or Irp) regulon and high-affinity branched-chain amino acid transport system | fig 439375.7.peg.1681, fig 439375.7.peg.1752, fig 439375.7.peg.3629                        | fig 204722.5.peg.1527, fig 204722.5.peg.1598                                                                      |
|                                                                                      | Threonine dehydratase (EC 4.3.1.19)                                                                                                        | fig 439375.7.peg.2245                                                                      | fig 204722.5.peg.1065                                                                                             |
|                                                                                      | Threonine dehydratase, catabolic (EC 4.3.1.19)                                                                                             | fig 439375.7.peg.1908, fig 439375.7.peg.3628                                               |                                                                                                                   |
|                                                                                      | HMG CoA Synthesis                                                                                                                          | Acetoacetyl-CoA synthetase (EC 6.2.1.16)                                                   | fig 439375.7.peg.37                                                                                               |
| Hydroxymethylglutaryl-CoA lyase (EC 4.1.3.4)                                         |                                                                                                                                            | fig 439375.7.peg.41                                                                        | fig 204722.5.peg.19                                                                                               |
| Isovaleryl-CoA dehydrogenase (EC 1.3.99.10)                                          |                                                                                                                                            | fig 439375.7.peg.38                                                                        | fig 204722.5.peg.22                                                                                               |
| Methylcrotonyl-CoA carboxylase biotin-containing subunit (EC 6.4.1.4)                |                                                                                                                                            | fig 439375.7.peg.40                                                                        | fig 204722.5.peg.20                                                                                               |
| Methylcrotonyl-CoA carboxylase carboxyl transferase subunit (EC 6.4.1.4)             |                                                                                                                                            | fig 439375.7.peg.39                                                                        | fig 204722.5.peg.21                                                                                               |
| Methylglutaconyl-CoA hydratase (EC 4.2.1.18)                                         |                                                                                                                                            | fig 439375.7.peg.42                                                                        | fig 204722.5.peg.17                                                                                               |
| Predicted transcriptional regulator LiuR of leucine degradation pathway, MerR family |                                                                                                                                            | fig 439375.7.peg.2115, fig 439375.7.peg.4211                                               | fig 204722.5.peg.1198, fig 204722.5.peg.3039                                                                      |
| Isoleucine degradation                                                               | 3-hydroxyacyl-CoA dehydrogenase (EC 1.1.1.35)                                                                                              | fig 439375.7.peg.3071, fig 439375.7.peg.4195, fig 439375.7.peg.4206, fig 439375.7.peg.4885 | fig 204722.5.peg.2440, fig 204722.5.peg.3008, fig 204722.5.peg.3311                                               |
|                                                                                      | 3-ketoacyl-CoA thiolase (EC 2.3.1.16)                                                                                                      | fig 439375.7.peg.4207                                                                      | fig 204722.5.peg.3009                                                                                             |
|                                                                                      | Branched-chain acyl-CoA dehydrogenase (EC 1.3.99.12)                                                                                       | fig 439375.7.peg.1971                                                                      | fig 204722.5.peg.1335, fig 204722.5.peg.2254, fig 204722.5.peg.2739, fig 204722.5.peg.3309, fig 204722.5.peg.3310 |
|                                                                                      | Branched-chain alpha-keto acid dehydrogenase, E1 component, alpha subunit (EC 1.2.4.4)                                                     | fig 439375.7.peg.3709                                                                      | fig 204722.5.peg.2254, fig 204722.5.peg.2740, fig 204722.5.peg.3309, fig 204722.5.peg.3310                        |
|                                                                                      | Branched-chain alpha-keto acid dehydrogenase, E1 component, beta subunit (EC 1.2.4.4)                                                      | fig 439375.7.peg.3711                                                                      | fig 204722.5.peg.3310, fig 204722.5.peg.2880, fig 204722.5.peg.2881                                               |
|                                                                                      | Branched-chain amino acid aminotransferase (EC 2.6.1.42)                                                                                   | fig 439375.7.peg.1734, fig 439375.7.peg.3936                                               | fig 204722.5.peg.2880, fig 204722.5.peg.2881                                                                      |
|                                                                                      | Butyryl-CoA dehydrogenase (EC 1.3.99.2)                                                                                                    | fig 439375.7.peg.3256, fig 439375.7.peg.4180                                               | fig 204722.5.peg.2437, fig 204722.5.peg.2665, fig 204722.5.peg.3313                                               |
|                                                                                      | Dihydrolipoamide acyltransferase component of branched-chain alpha-keto acid dehydrogenase complex (EC 2.3.1.168)                          | fig 439375.7.peg.3712                                                                      | fig 204722.5.peg.2255, fig 204722.5.peg.2741, fig 204722.5.peg.3307                                               |
|                                                                                      | Dihydrolipoamide dehydrogenase of branched-chain alpha-keto acid dehydrogenase (EC 1.8.1.4)                                                | fig 439375.7.peg.3713                                                                      | fig 204722.5.peg.2742                                                                                             |

**Branched-chain amino acids**

|                                                                                                                   |                                                                                        |                                                                            |                                                                            |
|-------------------------------------------------------------------------------------------------------------------|----------------------------------------------------------------------------------------|----------------------------------------------------------------------------|----------------------------------------------------------------------------|
| Leucine Biosynthesis                                                                                              | Enoyl-CoA hydratase (EC 4.2.1.17)                                                      | fig 439375.7.peg.564,<br>fig 439375.7.peg.4192,<br>fig 439375.7.peg.4195   | fig 204722.5.peg.427                                                       |
|                                                                                                                   | Enoyl-CoA hydratase [isoleucine degradation] (EC 4.2.1.17)                             | fig 439375.7.peg.4206                                                      | fig 204722.5.peg.3008                                                      |
|                                                                                                                   | 2-isopropylmalate synthase (EC 2.3.3.13)                                               | fig 439375.7.peg.1686                                                      | fig 204722.5.peg.1593                                                      |
|                                                                                                                   | 3-isopropylmalate dehydratase large subunit (EC 4.2.1.33)                              | fig 439375.7.peg.992                                                       | fig 204722.5.peg.1940                                                      |
|                                                                                                                   | 3-isopropylmalate dehydratase small subunit (EC 4.2.1.33)                              | fig 439375.7.peg.3452                                                      | fig 204722.5.peg.3101                                                      |
|                                                                                                                   | 3-isopropylmalate dehydrogenase (EC 1.1.1.85)                                          | fig 439375.7.peg.3441                                                      | fig 204722.5.peg.3109                                                      |
|                                                                                                                   |                                                                                        | fig 439375.7.peg.1734,<br>fig 204722.5.peg.2880,                           |                                                                            |
|                                                                                                                   | Branched-chain amino acid aminotransferase (EC 2.6.1.42)                               | fig 439375.7.peg.3936                                                      | fig 204722.5.peg.2881                                                      |
|                                                                                                                   |                                                                                        | fig 439375.7.peg.37                                                        | fig 204722.5.peg.24                                                        |
|                                                                                                                   | Acetoacetyl-CoA synthetase (EC 6.2.1.16)                                               | fig 439375.7.peg.1971                                                      | fig 204722.5.peg.1335                                                      |
| Branched-chain acyl-CoA dehydrogenase (EC 1.3.99.12)                                                              |                                                                                        | fig 204722.5.peg.2254,<br>fig 204722.5.peg.2739,<br>fig 204722.5.peg.3309, |                                                                            |
| Branched-chain alpha-keto acid dehydrogenase, E1 component, alpha subunit (EC 1.2.4.4)                            | fig 439375.7.peg.3709                                                                  | fig 204722.5.peg.3310                                                      |                                                                            |
|                                                                                                                   |                                                                                        | fig 204722.5.peg.2254,<br>fig 204722.5.peg.2740,<br>fig 204722.5.peg.3309, |                                                                            |
| Branched-chain alpha-keto acid dehydrogenase, E1 component, beta subunit (EC 1.2.4.4)                             | fig 439375.7.peg.3711                                                                  | fig 204722.5.peg.3310                                                      |                                                                            |
|                                                                                                                   | fig 439375.7.peg.1734,<br>fig 439375.7.peg.3936                                        | fig 204722.5.peg.2880,<br>fig 204722.5.peg.2881                            |                                                                            |
| Branched-chain amino acid aminotransferase (EC 2.6.1.42)                                                          |                                                                                        | fig 204722.5.peg.2255,<br>fig 204722.5.peg.2741,<br>fig 204722.5.peg.3307  |                                                                            |
| Dihydrolipoamide acyltransferase component of branched-chain alpha-keto acid dehydrogenase complex (EC 2.3.1.168) | fig 439375.7.peg.3712                                                                  | fig 204722.5.peg.3307                                                      |                                                                            |
| Dihydrolipoamide dehydrogenase of branched-chain alpha-keto acid dehydrogenase (EC 1.8.1.4)                       | fig 439375.7.peg.3713                                                                  | fig 204722.5.peg.2742                                                      |                                                                            |
|                                                                                                                   |                                                                                        | fig 204722.5.peg.18,<br>fig 204722.5.peg.19                                |                                                                            |
| Hydroxymethylglutaryl-CoA lyase (EC 4.1.3.4)                                                                      | fig 439375.7.peg.41                                                                    | fig 204722.5.peg.19                                                        |                                                                            |
| Isovaleryl-CoA dehydrogenase (EC 1.3.99.10)                                                                       | fig 439375.7.peg.38                                                                    | fig 204722.5.peg.22                                                        |                                                                            |
| Methylcrotonyl-CoA carboxylase biotin-containing subunit (EC 6.4.1.4)                                             | fig 439375.7.peg.40                                                                    | fig 204722.5.peg.20                                                        |                                                                            |
| Methylcrotonyl-CoA carboxylase carboxyl transferase subunit (EC 6.4.1.4)                                          | fig 439375.7.peg.39                                                                    | fig 204722.5.peg.21                                                        |                                                                            |
| Methylglutaconyl-CoA hydratase (EC 4.2.1.18)                                                                      | fig 439375.7.peg.42                                                                    | fig 204722.5.peg.17                                                        |                                                                            |
| Leucine Degradation and HMG-CoA Metabolism                                                                        |                                                                                        | fig 439375.7.peg.3071,<br>fig 439375.7.peg.4195,<br>fig 439375.7.peg.4206, | fig 204722.5.peg.2440,<br>fig 204722.5.peg.3008,<br>fig 204722.5.peg.3311  |
|                                                                                                                   | 3-hydroxyacyl-CoA dehydrogenase (EC 1.1.1.35)                                          | fig 439375.7.peg.4885                                                      | fig 204722.5.peg.964,<br>fig 204722.5.peg.1336                             |
|                                                                                                                   | 3-hydroxyisobutyrate dehydrogenase (EC 1.1.1.31)                                       | fig 439375.7.peg.1970                                                      | fig 204722.5.peg.1336                                                      |
|                                                                                                                   | Branched-chain acyl-CoA dehydrogenase (EC 1.3.99.12)                                   | fig 439375.7.peg.1971                                                      | fig 204722.5.peg.1335                                                      |
|                                                                                                                   |                                                                                        |                                                                            | fig 204722.5.peg.2254,<br>fig 204722.5.peg.2739,<br>fig 204722.5.peg.3309, |
|                                                                                                                   | Branched-chain alpha-keto acid dehydrogenase, E1 component, alpha subunit (EC 1.2.4.4) | fig 439375.7.peg.3709                                                      | fig 204722.5.peg.3310                                                      |

|                                                                   |                                                                                                                   |                                                                                                                                                                                                           |                                                                                                     |
|-------------------------------------------------------------------|-------------------------------------------------------------------------------------------------------------------|-----------------------------------------------------------------------------------------------------------------------------------------------------------------------------------------------------------|-----------------------------------------------------------------------------------------------------|
| Valine degradation                                                | Branched-chain alpha-keto acid dehydrogenase, E1 component, beta subunit (EC 1.2.4.4)                             | fig 439375.7.peg.3711                                                                                                                                                                                     | fig 204722.5.peg.2254,<br>fig 204722.5.peg.2740,<br>fig 204722.5.peg.3309,<br>fig 204722.5.peg.3310 |
|                                                                   | Branched-chain amino acid aminotransferase (EC 2.6.1.42)                                                          | fig 439375.7.peg.1734,<br>fig 439375.7.peg.3936                                                                                                                                                           | fig 204722.5.peg.2880,<br>fig 204722.5.peg.2881                                                     |
|                                                                   | Butyryl-CoA dehydrogenase (EC 1.3.99.2)                                                                           | fig 439375.7.peg.3256,<br>fig 439375.7.peg.4180                                                                                                                                                           | fig 204722.5.peg.2437,<br>fig 204722.5.peg.2665,<br>fig 204722.5.peg.3313                           |
|                                                                   | Dihydrolipoamide acyltransferase component of branched-chain alpha-keto acid dehydrogenase complex (EC 2.3.1.168) | fig 439375.7.peg.3712                                                                                                                                                                                     | fig 204722.5.peg.2255,<br>fig 204722.5.peg.2741,<br>fig 204722.5.peg.3307                           |
|                                                                   | Dihydrolipoamide dehydrogenase of branched-chain alpha-keto acid dehydrogenase (EC 1.8.1.4)                       | fig 439375.7.peg.3713                                                                                                                                                                                     | fig 204722.5.peg.2742                                                                               |
|                                                                   | Enoyl-CoA hydratase (EC 4.2.1.17)                                                                                 | fig 439375.7.peg.564,<br>fig 439375.7.peg.4192,<br>fig 439375.7.peg.4195                                                                                                                                  | fig 204722.5.peg.427                                                                                |
|                                                                   | Enoyl-CoA hydratase [valine degradation] (EC 4.2.1.17)                                                            | fig 439375.7.peg.2669                                                                                                                                                                                     | fig 204722.5.peg.771                                                                                |
|                                                                   | Methylmalonate-semialdehyde dehydrogenase (EC 1.2.1.27)                                                           | fig 439375.7.peg.1117                                                                                                                                                                                     | fig 204722.5.peg.1862                                                                               |
|                                                                   | NADP-specific glutamate dehydrogenase (EC 1.4.1.4)                                                                | fig 439375.7.peg.322,<br>fig 439375.7.peg.4768                                                                                                                                                            | fig 204722.5.peg.234                                                                                |
|                                                                   | NAD-specific glutamate dehydrogenase (EC 1.4.1.2)                                                                 | fig 439375.7.peg.4768                                                                                                                                                                                     |                                                                                                     |
| NAD-specific glutamate dehydrogenase (EC 1.4.1.2), large form     | fig 439375.7.peg.1133                                                                                             | fig 204722.5.peg.1849                                                                                                                                                                                     |                                                                                                     |
| Glutamine synthetases                                             | Glutamine synthetase type I (EC 6.3.1.2)                                                                          | fig 439375.7.peg.2193                                                                                                                                                                                     | fig 204722.5.peg.1015                                                                               |
|                                                                   | Glutamine synthetase type II, eukaryotic (EC 6.3.1.2)                                                             | fig 439375.7.peg.4328                                                                                                                                                                                     |                                                                                                     |
| Glutamine, glutamate, aspartate, asparagine; ammonia assimilation | Asparagine synthetase [glutamine-hydrolyzing] (EC 6.3.5.4)                                                        | fig 439375.7.peg.3112                                                                                                                                                                                     |                                                                                                     |
|                                                                   | Aspartate aminotransferase (EC 2.6.1.1)                                                                           | fig 439375.7.peg.437,<br>fig 439375.7.peg.816,<br>fig 439375.7.peg.1014,<br>fig 439375.7.peg.1763,<br>fig 439375.7.peg.2016,<br>fig 439375.7.peg.2519,<br>fig 439375.7.peg.3650,<br>fig 439375.7.peg.4201 | fig 204722.5.peg.1297,<br>fig 204722.5.peg.1403,<br>fig 204722.5.peg.1522,<br>fig 204722.5.peg.1928 |
|                                                                   | Aspartate ammonia-lyase (EC 4.3.1.1)                                                                              |                                                                                                                                                                                                           | fig 204722.5.peg.1993                                                                               |
|                                                                   | Aspartate racemase (EC 5.1.1.13)                                                                                  | fig 439375.7.peg.587                                                                                                                                                                                      |                                                                                                     |
|                                                                   | Glutamate racemase (EC 5.1.1.3)                                                                                   | fig 439375.7.peg.868,<br>fig 439375.7.peg.2098                                                                                                                                                            | fig 204722.5.peg.1214                                                                               |
|                                                                   | Glutamate synthase [NADPH] large chain (EC 1.4.1.13)                                                              | fig 439375.7.peg.4450                                                                                                                                                                                     | fig 204722.5.peg.2274                                                                               |
|                                                                   | Glutamate synthase [NADPH] small chain (EC 1.4.1.13)                                                              | fig 439375.7.peg.4449                                                                                                                                                                                     | fig 204722.5.peg.2275                                                                               |
|                                                                   | Glutaminase (EC 3.5.1.2)                                                                                          | Glutaminase (EC 3.5.1.2)                                                                                                                                                                                  | fig 204722.5.peg.2556                                                                               |
|                                                                   | glutamine synthetase family protein                                                                               | fig 439375.7.peg.4050,<br>fig 439375.7.peg.4108                                                                                                                                                           | fig 204722.5.peg.2947,<br>fig 204722.5.peg.2980                                                     |
|                                                                   | Glutamine synthetase type I (EC 6.3.1.2)                                                                          | fig 439375.7.peg.2193                                                                                                                                                                                     | fig 204722.5.peg.1015                                                                               |
| Glutamine synthetase type II, eukaryotic (EC 6.3.1.2)             | fig 439375.7.peg.4328                                                                                             |                                                                                                                                                                                                           |                                                                                                     |

Glutamine, glutamate, aspartate, asparagine; ammonia assimilation

Glutamine, Glutamate, Aspartate and Asparagine Biosynthesis

|                                                              |                                                                                       |                                                                                                                                            |                                                                            |                                                 |
|--------------------------------------------------------------|---------------------------------------------------------------------------------------|--------------------------------------------------------------------------------------------------------------------------------------------|----------------------------------------------------------------------------|-------------------------------------------------|
|                                                              |                                                                                       | L-asparaginase (EC 3.5.1.1)                                                                                                                | fig 439375.7.peg.3556                                                      | fig 204722.5.peg.1995,<br>fig 204722.5.peg.1997 |
|                                                              |                                                                                       | Leucine-responsive regulatory protein, regulator for leucine (or lrp) regulon and high-affinity branched-chain amino acid transport system | fig 439375.7.peg.1681,<br>fig 439375.7.peg.1752,<br>fig 439375.7.peg.3629  | fig 204722.5.peg.1527,<br>fig 204722.5.peg.1598 |
|                                                              |                                                                                       | NADP-specific glutamate dehydrogenase (EC 1.4.1.4)                                                                                         | fig 439375.7.peg.322,<br>fig 439375.7.peg.4768                             | fig 204722.5.peg.234                            |
|                                                              |                                                                                       | NAD-specific glutamate dehydrogenase (EC 1.4.1.2)                                                                                          | fig 439375.7.peg.4768                                                      |                                                 |
|                                                              |                                                                                       | NAD-specific glutamate dehydrogenase (EC 1.4.1.2), large form                                                                              | fig 439375.7.peg.1133                                                      | fig 204722.5.peg.1849                           |
| Histidine Metabolism                                         | Histidine Biosynthesis                                                                | ATP phosphoribosyltransferase catalytic subunit (EC 2.4.2.17)                                                                              | fig 439375.7.peg.3171                                                      | fig 204722.5.peg.2405                           |
|                                                              |                                                                                       | ATP phosphoribosyltransferase regulatory subunit (EC 2.4.2.17)                                                                             | fig 439375.7.peg.3170                                                      | fig 204722.5.peg.2404                           |
|                                                              |                                                                                       |                                                                                                                                            | fig 439375.7.peg.348,                                                      |                                                 |
|                                                              |                                                                                       | Histidinol dehydrogenase (EC 1.1.1.23)                                                                                                     | fig 439375.7.peg.3741                                                      | fig 204722.5.peg.261                            |
|                                                              |                                                                                       | Histidinol-phosphate aminotransferase (EC 2.6.1.9)                                                                                         | fig 439375.7.peg.2792                                                      | fig 204722.5.peg.651                            |
|                                                              |                                                                                       | Imidazole glycerol phosphate synthase amidotransferase subunit (EC 2.4.2.-)                                                                | fig 439375.7.peg.881                                                       | fig 204722.5.peg.2120                           |
|                                                              |                                                                                       | Imidazole glycerol phosphate synthase cyclase subunit (EC 4.1.3.-)                                                                         | fig 439375.7.peg.879                                                       | fig 204722.5.peg.2122                           |
|                                                              |                                                                                       | Imidazoleglycerol-phosphate dehydratase (EC 4.2.1.19)                                                                                      | fig 439375.7.peg.883                                                       | fig 204722.5.peg.2118                           |
|                                                              |                                                                                       | Phosphoribosyl-AMP cyclohydrolase (EC 3.5.4.19)                                                                                            | fig 439375.7.peg.2267                                                      | fig 204722.5.peg.1090                           |
|                                                              |                                                                                       | Phosphoribosyl-ATP pyrophosphatase (EC 3.6.1.31)                                                                                           | fig 439375.7.peg.878                                                       | fig 204722.5.peg.2123                           |
|                                                              | Phosphoribosylformimino-5-aminoimidazole carboxamide ribotide isomerase (EC 5.3.1.16) | fig 439375.7.peg.880                                                                                                                       | fig 204722.5.peg.2121                                                      |                                                 |
|                                                              | Histidine Degradation                                                                 | Conserved hypothetical protein (perhaps related to histidine degradation)                                                                  | fig 439375.7.peg.1500                                                      | fig 204722.5.peg.3151                           |
|                                                              |                                                                                       | Formiminoglutamic iminohydrolase (EC 3.5.3.13)                                                                                             | fig 439375.7.peg.1506                                                      | fig 204722.5.peg.3145                           |
|                                                              |                                                                                       | Histidine ammonia-lyase (EC 4.3.1.3)                                                                                                       | fig 439375.7.peg.1504                                                      | fig 204722.5.peg.3148                           |
|                                                              |                                                                                       |                                                                                                                                            | fig 439375.7.peg.1507,<br>fig 439375.7.peg.3743,<br>fig 439375.7.peg.4961, |                                                 |
|                                                              |                                                                                       | Histidine utilization repressor                                                                                                            | fig 439375.7.peg.4965                                                      | fig 204722.5.peg.3144                           |
|                                                              |                                                                                       | Imidazolonepropionase (EC 3.5.2.7)                                                                                                         | fig 439375.7.peg.1505                                                      | fig 204722.5.peg.3147                           |
|                                                              |                                                                                       | N-formylglutamate deformylase (EC 3.5.1.68)                                                                                                | fig 439375.7.peg.1503                                                      | fig 204722.5.peg.3149                           |
|                                                              |                                                                                       | Urocanate hydratase (EC 4.2.1.49)                                                                                                          | fig 439375.7.peg.1502                                                      | fig 204722.5.peg.3150                           |
|                                                              | Cysteine Biosynthesis                                                                 | Adenylylsulfate kinase (EC 2.7.1.25)                                                                                                       | fig 439375.7.peg.213                                                       | fig 204722.5.peg.202                            |
| Cystathionine gamma-lyase (EC 4.4.1.1)                       |                                                                                       | fig 439375.7.peg.4548                                                                                                                      |                                                                            |                                                 |
|                                                              |                                                                                       | fig 439375.7.peg.692,                                                                                                                      | fig 204722.5.peg.2003,                                                     |                                                 |
| Cysteine synthase (EC 2.5.1.47)                              |                                                                                       | fig 439375.7.peg.1064                                                                                                                      | fig 204722.5.peg.2004                                                      |                                                 |
| Cysteine synthase B (EC 2.5.1.47)                            |                                                                                       | fig 439375.7.peg.2248                                                                                                                      | fig 204722.5.peg.1067                                                      |                                                 |
|                                                              |                                                                                       |                                                                                                                                            |                                                                            |                                                 |
| Phosphoadenylyl-sulfate reductase [thioredoxin] (EC 1.8.4.8) |                                                                                       | fig 439375.7.peg.202                                                                                                                       | fig 204722.5.peg.191                                                       |                                                 |
| Serine acetyltransferase (EC 2.3.1.30)                       |                                                                                       | fig 439375.7.peg.2027                                                                                                                      | fig 204722.5.peg.1281                                                      |                                                 |
| Sulfate adenylyltransferase subunit 1 (EC 2.7.7.4)           |                                                                                       | fig 439375.7.peg.213                                                                                                                       | fig 204722.5.peg.202                                                       |                                                 |
| Sulfate adenylyltransferase subunit 2 (EC 2.7.7.4)           |                                                                                       | fig 439375.7.peg.212                                                                                                                       | fig 204722.5.peg.201                                                       |                                                 |
|                                                              |                                                                                       | fig 439375.7.peg.127,                                                                                                                      | fig 204722.5.peg.111,                                                      |                                                 |
| Sulfate and thiosulfate binding protein CysP                 |                                                                                       | fig 439375.7.peg.1954                                                                                                                      | fig 204722.5.peg.1355                                                      |                                                 |

Lysine, threonine,  
methionine, and cysteine

|                                                      |                                                                                   |                                                                                                                               |                        |
|------------------------------------------------------|-----------------------------------------------------------------------------------|-------------------------------------------------------------------------------------------------------------------------------|------------------------|
|                                                      | Sulfate and thiosulfate import ATP-binding protein CysA (EC 3.6.3.25)             | fig 439375.7.peg.130                                                                                                          | fig 204722.5.peg.114   |
|                                                      |                                                                                   | fig 439375.7.peg.128,                                                                                                         | fig 204722.5.peg.112,  |
|                                                      | Sulfate transport system permease protein CysT                                    | fig 439375.7.peg.1955                                                                                                         | fig 204722.5.peg.1353  |
|                                                      |                                                                                   | fig 439375.7.peg.129,                                                                                                         | fig 204722.5.peg.113,  |
|                                                      | Sulfate transport system permease protein CysW                                    | fig 439375.7.peg.1956                                                                                                         | fig 204722.5.peg.1352  |
|                                                      | Sulfite reductase [NADPH] flavoprotein alpha-component (EC 1.8.1.2)               |                                                                                                                               | fig 204722.5.peg.2451  |
|                                                      | Sulfite reductase [NADPH] hemoprotein beta-component (EC 1.8.1.2)                 | fig 439375.7.peg.201                                                                                                          | fig 204722.5.peg.190   |
| Lysine Biosynthesis DAP Pathway                      | 2,3,4,5-tetrahydropyridine-2,6-dicarboxylate N-succinyltransferase (EC 2.3.1.117) | fig 439375.7.peg.1420                                                                                                         | fig 204722.5.peg.3253  |
|                                                      | Aspartate-semialdehyde dehydrogenase (EC 1.2.1.11)                                | fig 439375.7.peg.3445                                                                                                         | fig 204722.5.peg.3105  |
|                                                      | Aspartokinase (EC 2.7.2.4)                                                        | fig 439375.7.peg.1084                                                                                                         | fig 204722.5.peg.1906  |
|                                                      | Diaminopimelate decarboxylase (EC 4.1.1.20)                                       | fig 439375.7.peg.1045                                                                                                         | fig 204722.5.peg.2020  |
|                                                      | Diaminopimelate epimerase (EC 5.1.1.7)                                            | fig 439375.7.peg.972                                                                                                          | fig 204722.5.peg.1966  |
|                                                      | Dihydrodipicolinate reductase (EC 1.3.1.26)                                       | fig 439375.7.peg.1393                                                                                                         | fig 204722.5.peg.3276  |
|                                                      |                                                                                   | fig 439375.7.peg.382,<br>fig 439375.7.peg.2312,<br>fig 439375.7.peg.2783,<br>fig 439375.7.peg.3449,<br>fig 439375.7.peg.3491, | fig 204722.5.peg.660,  |
|                                                      | Dihydrodipicolinate synthase (EC 4.2.1.52)                                        | fig 439375.7.peg.4579                                                                                                         | fig 204722.5.peg.2619  |
|                                                      |                                                                                   | fig 439375.7.peg.2588,                                                                                                        |                        |
|                                                      | N-acetyl-L,L-diaminopimelate deacetylase (EC 3.5.1.47)                            | fig 439375.7.peg.3469                                                                                                         |                        |
|                                                      | N-succinyl-L,L-diaminopimelate desuccinylase (EC 3.5.1.18)                        | fig 439375.7.peg.1415                                                                                                         | fig 204722.5.peg.3256  |
| Methionine Biosynthesis                              | 5,10-methylenetetrahydrofolate reductase (EC 1.5.1.20)                            | fig 439375.7.peg.1821                                                                                                         | fig 204722.5.peg.1478  |
|                                                      | 5-methyltetrahydrofolate--homocysteine methyltransferase (EC 2.1.1.13)            | fig 439375.7.peg.208                                                                                                          | fig 204722.5.peg.197   |
|                                                      | Adenosylhomocysteinase (EC 3.3.1.1)                                               | fig 439375.7.peg.867                                                                                                          | fig 204722.5.peg.2135  |
|                                                      | Cystathionine beta-lyase (EC 4.4.1.8)                                             | fig 439375.7.peg.2696                                                                                                         | fig 204722.5.peg.753   |
|                                                      | Cystathionine gamma-lyase (EC 4.4.1.1)                                            | fig 439375.7.peg.4548                                                                                                         |                        |
|                                                      |                                                                                   | fig 439375.7.peg.378,                                                                                                         |                        |
|                                                      | Cystathionine gamma-synthase (EC 2.5.1.48)                                        | fig 439375.7.peg.1066                                                                                                         | fig 204722.5.peg.2001  |
|                                                      |                                                                                   | fig 439375.7.peg.692,                                                                                                         | fig 204722.5.peg.2003, |
|                                                      | Cysteine synthase (EC 2.5.1.47)                                                   | fig 439375.7.peg.1064                                                                                                         | fig 204722.5.peg.2004  |
|                                                      | Homoserine dehydrogenase (EC 1.1.1.3)                                             | fig 439375.7.peg.2017                                                                                                         | fig 204722.5.peg.1296  |
|                                                      |                                                                                   |                                                                                                                               | fig 204722.5.peg.491,  |
|                                                      | Homoserine kinase (EC 2.7.1.39)                                                   | fig 439375.7.peg.630                                                                                                          | fig 204722.5.peg.3395  |
|                                                      | Homoserine O-succinyltransferase (EC 2.3.1.46)                                    | fig 439375.7.peg.3648                                                                                                         | fig 204722.5.peg.2705  |
|                                                      |                                                                                   | fig 439375.7.peg.1463,<br>fig 439375.7.peg.2213,                                                                              | fig 204722.5.peg.1032, |
|                                                      | Methionine ABC transporter ATP-binding protein                                    | fig 439375.7.peg.3956                                                                                                         | fig 204722.5.peg.3183  |
|                                                      |                                                                                   | fig 439375.7.peg.1462,                                                                                                        |                        |
|                                                      | Methionine ABC transporter permease protein                                       | fig 439375.7.peg.3955                                                                                                         | fig 204722.5.peg.3184  |
|                                                      | fig 439375.7.peg.778,<br>fig 439375.7.peg.1464,                                   | fig 204722.5.peg.2212,                                                                                                        |                        |
| Methionine ABC transporter substrate-binding protein | fig 439375.7.peg.3957                                                             | fig 204722.5.peg.3181                                                                                                         |                        |

|                                                      |                                                                                                    |                                                                                                                                                                                                           |                                                                                                     |                       |
|------------------------------------------------------|----------------------------------------------------------------------------------------------------|-----------------------------------------------------------------------------------------------------------------------------------------------------------------------------------------------------------|-----------------------------------------------------------------------------------------------------|-----------------------|
|                                                      | O-acetylhomoserine sulfhydrylase (EC 2.5.1.49)                                                     | fig 439375.7.peg.424,<br>fig 439375.7.peg.2625                                                                                                                                                            | fig 204722.5.peg.318,<br>fig 204722.5.peg.804                                                       |                       |
|                                                      | O-succinylhomoserine sulfhydrylase (EC 2.5.1.48)                                                   | fig 439375.7.peg.424,<br>fig 439375.7.peg.2625                                                                                                                                                            | fig 204722.5.peg.318,<br>fig 204722.5.peg.804                                                       |                       |
|                                                      | S-adenosylhomocysteine nucleosidase (EC 3.2.2.9)                                                   | fig 439375.7.peg.3208                                                                                                                                                                                     | fig 204722.5.peg.2574                                                                               |                       |
|                                                      | S-adenosylmethionine synthetase (EC 2.5.1.6)                                                       | fig 439375.7.peg.794                                                                                                                                                                                      | fig 204722.5.peg.2197                                                                               |                       |
|                                                      | Serine acetyltransferase (EC 2.3.1.30)                                                             | fig 439375.7.peg.2027                                                                                                                                                                                     | fig 204722.5.peg.1281                                                                               |                       |
| Methionine Degradation                               | 2-Oxobutyrate oxidase, putative                                                                    | fig 439375.7.peg.3954                                                                                                                                                                                     |                                                                                                     |                       |
|                                                      | Adenosylhomocysteinase (EC 3.3.1.1)                                                                | fig 439375.7.peg.867                                                                                                                                                                                      | fig 204722.5.peg.2135                                                                               |                       |
|                                                      | Cystathionine gamma-lyase (EC 4.4.1.1)                                                             | fig 439375.7.peg.4548                                                                                                                                                                                     |                                                                                                     |                       |
|                                                      |                                                                                                    | fig 439375.7.peg.1463,<br>fig 439375.7.peg.2213,<br>fig 439375.7.peg.3956                                                                                                                                 | fig 204722.5.peg.1032,<br>fig 204722.5.peg.3183                                                     |                       |
|                                                      | Methionine ABC transporter ATP-binding protein                                                     | fig 439375.7.peg.1462,<br>fig 439375.7.peg.3955                                                                                                                                                           | fig 204722.5.peg.3184                                                                               |                       |
|                                                      | Methionine ABC transporter permease protein                                                        | fig 439375.7.peg.778,<br>fig 439375.7.peg.1464,<br>fig 439375.7.peg.3957                                                                                                                                  | fig 204722.5.peg.2212,<br>fig 204722.5.peg.3181                                                     |                       |
|                                                      | Methionine ABC transporter substrate-binding protein                                               | fig 439375.7.peg.699                                                                                                                                                                                      |                                                                                                     |                       |
|                                                      | Pyruvate dehydrogenase E1 component (EC 1.2.4.1)                                                   | fig 439375.7.peg.699                                                                                                                                                                                      |                                                                                                     |                       |
|                                                      | S-adenosylhomocysteine nucleosidase (EC 3.2.2.9)                                                   | fig 439375.7.peg.3208                                                                                                                                                                                     | fig 204722.5.peg.2574                                                                               |                       |
|                                                      | S-adenosylmethionine synthetase (EC 2.5.1.6)                                                       | fig 439375.7.peg.794                                                                                                                                                                                      | fig 204722.5.peg.2197                                                                               |                       |
| Threonine and Homoserine Biosynthesis                |                                                                                                    | fig 439375.7.peg.437,<br>fig 439375.7.peg.816,<br>fig 439375.7.peg.1014,<br>fig 439375.7.peg.1763,<br>fig 439375.7.peg.2016,<br>fig 439375.7.peg.2519,<br>fig 439375.7.peg.3650,<br>fig 439375.7.peg.4201 | fig 204722.5.peg.1297,<br>fig 204722.5.peg.1403,<br>fig 204722.5.peg.1522,<br>fig 204722.5.peg.1928 |                       |
|                                                      | Aspartate aminotransferase (EC 2.6.1.1)                                                            | fig 439375.7.peg.3445                                                                                                                                                                                     | fig 204722.5.peg.3105                                                                               |                       |
|                                                      | Aspartate-semialdehyde dehydrogenase (EC 1.2.1.11)                                                 | fig 439375.7.peg.1084                                                                                                                                                                                     | fig 204722.5.peg.1906                                                                               |                       |
|                                                      | Aspartokinase (EC 2.7.2.4)                                                                         | fig 439375.7.peg.2017                                                                                                                                                                                     | fig 204722.5.peg.1296                                                                               |                       |
|                                                      | Homoserine dehydrogenase (EC 1.1.1.3)                                                              | fig 439375.7.peg.630                                                                                                                                                                                      | fig 204722.5.peg.491,<br>fig 204722.5.peg.3395                                                      |                       |
|                                                      | Homoserine kinase (EC 2.7.1.39)                                                                    | fig 439375.7.peg.639,<br>fig 439375.7.peg.704                                                                                                                                                             | fig 204722.5.peg.499                                                                                |                       |
|                                                      | Threonine synthase (EC 4.2.3.1)                                                                    | fig 439375.7.peg.704                                                                                                                                                                                      | fig 204722.5.peg.499                                                                                |                       |
|                                                      |                                                                                                    | FIG003492: Threonine dehydrogenase and related Zn-dependent dehydrogenases                                                                                                                                | fig 439375.7.peg.1693                                                                               | fig 204722.5.peg.1587 |
|                                                      |                                                                                                    | Low-specificity L-threonine aldolase (EC 4.1.2.5)                                                                                                                                                         | fig 439375.7.peg.4452                                                                               | fig 204722.5.peg.2273 |
|                                                      |                                                                                                    | Threonine dehydratase (EC 4.3.1.19)                                                                                                                                                                       | fig 439375.7.peg.2245                                                                               | fig 204722.5.peg.1065 |
| Threonine degradation                                | Threonine dehydratase, catabolic (EC 4.3.1.19)                                                     | fig 439375.7.peg.1908,<br>fig 439375.7.peg.3628                                                                                                                                                           |                                                                                                     |                       |
|                                                      | Threonine dehydrogenase and related Zn-dependent dehydrogenases                                    | fig 439375.7.peg.3612                                                                                                                                                                                     |                                                                                                     |                       |
|                                                      | Transcriptional regulator GabR of GABA utilization (GntR family with aminotransferase-like domain) | fig 439375.7.peg.3620                                                                                                                                                                                     |                                                                                                     |                       |
|                                                      |                                                                                                    | fig 439375.7.peg.1144,<br>fig 439375.7.peg.4307                                                                                                                                                           | fig 204722.5.peg.1836                                                                               |                       |
|                                                      |                                                                                                    | fig 439375.7.peg.4136                                                                                                                                                                                     | fig 204722.5.peg.2996                                                                               |                       |
| A Hypothetical Protein Related to Proline Metabolism | Hypothetical protein YggS, proline synthase co-transcribed bacterial homolog PROSC                 | fig 439375.7.peg.1144,<br>fig 439375.7.peg.4307                                                                                                                                                           | fig 204722.5.peg.1836                                                                               |                       |
|                                                      |                                                                                                    | fig 439375.7.peg.4136                                                                                                                                                                                     | fig 204722.5.peg.2996                                                                               |                       |
|                                                      | Pyrraline-5-carboxylate reductase (EC 1.5.1.2)                                                     | fig 439375.7.peg.4136                                                                                                                                                                                     | fig 204722.5.peg.2996                                                                               |                       |

|                              |                                                  |                                                                                     |                                                                           |                                                                                                     |
|------------------------------|--------------------------------------------------|-------------------------------------------------------------------------------------|---------------------------------------------------------------------------|-----------------------------------------------------------------------------------------------------|
| Proline and 4-hydroxyproline | Proline Synthesis                                | Gamma-glutamyl phosphate reductase (EC 1.2.1.41)                                    | fig 439375.7.peg.1104                                                     | fig 204722.5.peg.1875                                                                               |
|                              |                                                  | Glutamate 5-kinase (EC 2.7.2.11)                                                    | fig 439375.7.peg.1103                                                     | fig 204722.5.peg.1876                                                                               |
|                              |                                                  | NADP-specific glutamate dehydrogenase (EC 1.4.1.4)                                  | fig 439375.7.peg.322,<br>fig 439375.7.peg.4768                            | fig 204722.5.peg.234                                                                                |
|                              |                                                  | Pyrrroline-5-carboxylate reductase (EC 1.5.1.2)                                     | fig 439375.7.peg.4136                                                     | fig 204722.5.peg.2996                                                                               |
|                              | Proline, 4-hydroxyproline uptake and utilization | 1-pyrroline-4-hydroxy-2-carboxylate deaminase (EC 3.5.4.22)                         | fig 439375.7.peg.3044                                                     | fig 204722.5.peg.2456                                                                               |
|                              |                                                  | 4-hydroxyproline epimerase (EC 5.1.1.8)                                             | fig 439375.7.peg.1161                                                     | fig 204722.5.peg.1819                                                                               |
|                              |                                                  | Delta-1-pyrroline-5-carboxylate dehydrogenase (EC 1.5.1.12)                         | fig 439375.7.peg.4014                                                     | fig 204722.5.peg.2937                                                                               |
|                              |                                                  | L-Proline/Glycine betaine transporter ProP                                          | fig 439375.7.peg.1328                                                     | fig 204722.5.peg.1707                                                                               |
|                              |                                                  | Not a Proline racemase, nor 4-hydroxyproline epimerase [missing catalytic residues] | fig 439375.7.peg.468                                                      | fig 204722.5.peg.351                                                                                |
|                              |                                                  | Predicted regulator PutR for proline utilization, GntR family                       | fig 439375.7.peg.1159,<br>fig 439375.7.peg.1347                           | fig 204722.5.peg.1823,<br>fig 204722.5.peg.3240,<br>fig 204722.5.peg.3298,<br>fig 204722.5.peg.3320 |
|                              |                                                  | Proline dehydrogenase (EC 1.5.99.8) (Proline oxidase)                               | fig 439375.7.peg.4014                                                     | fig 204722.5.peg.2937                                                                               |
|                              |                                                  | Proline iminopeptidase (EC 3.4.11.5)                                                | fig 439375.7.peg.433,<br>fig 439375.7.peg.3235                            | fig 204722.5.peg.327                                                                                |
|                              |                                                  | PutR, transcriptional activator of PutA and PutP                                    | fig 439375.7.peg.4015                                                     | fig 204722.5.peg.2938                                                                               |
|                              |                                                  | Ureidoglycolate/malate/sulfolactate dehydrogenase family (EC 1.1.1.-)               | fig 439375.7.peg.3045                                                     | fig 204722.5.peg.2457                                                                               |
| Aminosugars                  | Chitin and N-acetylglucosamine utilization       | Glucosamine-6-phosphate deaminase [isomerizing], alternative (EC 3.5.99.6)          | fig 439375.7.peg.1524                                                     | fig 204722.5.peg.3130                                                                               |
|                              |                                                  | hypothetical oxidoreductase related to N-acetylglucosamine utilization              | fig 439375.7.peg.3706                                                     | fig 204722.5.peg.2736                                                                               |
|                              |                                                  | N-Acetyl-D-glucosamine ABC transport system ATP-binding protein                     | fig 439375.7.peg.3707,<br>fig 439375.7.peg.4062                           | fig 204722.5.peg.2737,<br>fig 204722.5.peg.2957                                                     |
|                              |                                                  | N-Acetyl-D-glucosamine ABC transport system, permease protein 1                     | fig 439375.7.peg.2615,<br>fig 439375.7.peg.3704                           | fig 204722.5.peg.2734                                                                               |
|                              |                                                  | N-Acetyl-D-glucosamine ABC transport system, permease protein 2                     | fig 439375.7.peg.2614,<br>fig 439375.7.peg.3705                           | fig 204722.5.peg.2735                                                                               |
|                              |                                                  | N-Acetyl-D-glucosamine ABC transport system, sugar-binding protein                  | fig 439375.7.peg.3703                                                     | fig 204722.5.peg.2732                                                                               |
|                              |                                                  | N-acetylglucosamine kinase of eukaryotic type (EC 2.7.1.59)                         | fig 439375.7.peg.3274,<br>fig 439375.7.peg.3702,<br>fig 439375.7.peg.4343 | fig 204722.5.peg.2731,<br>fig 204722.5.peg.3347                                                     |
|                              |                                                  | N-acetylglucosamine-6-phosphate deacetylase (EC 3.5.1.25)                           | fig 439375.7.peg.1525                                                     | fig 204722.5.peg.3129                                                                               |
|                              |                                                  | Predicted transcriptional regulator of N-Acetylglucosamine utilization, GntR family | fig 439375.7.peg.1523,<br>fig 439375.7.peg.3701                           | fig 204722.5.peg.2730,<br>fig 204722.5.peg.3131                                                     |
|                              |                                                  | 2-oxoglutarate dehydrogenase E1 component (EC 1.2.4.2)                              | fig 439375.7.peg.978                                                      | fig 204722.5.peg.1958                                                                               |
|                              |                                                  | Acetoin dehydrogenase E1 component alpha-subunit (EC 1.2.4.-)                       | fig 439375.7.peg.4290                                                     |                                                                                                     |
|                              |                                                  | Acetoin dehydrogenase E1 component beta-subunit (EC 1.2.4.-)                        | fig 439375.7.peg.4289                                                     |                                                                                                     |

|                                                                                  |                                                                                                                   |                                                                           |                                                                                                     |
|----------------------------------------------------------------------------------|-------------------------------------------------------------------------------------------------------------------|---------------------------------------------------------------------------|-----------------------------------------------------------------------------------------------------|
| Dehydrogenase complexes                                                          | Branched-chain alpha-keto acid dehydrogenase, E1 component, alpha subunit (EC 1.2.4.4)                            | fig 439375.7.peg.3709                                                     | fig 204722.5.peg.2254,<br>fig 204722.5.peg.2739,<br>fig 204722.5.peg.3309,<br>fig 204722.5.peg.3310 |
|                                                                                  | Branched-chain alpha-keto acid dehydrogenase, E1 component, beta subunit (EC 1.2.4.4)                             | fig 439375.7.peg.3711                                                     | fig 204722.5.peg.2254,<br>fig 204722.5.peg.2740,<br>fig 204722.5.peg.3309,<br>fig 204722.5.peg.3310 |
|                                                                                  | Cytosol aminopeptidase PepA (EC 3.4.11.1)                                                                         | fig 439375.7.peg.2741                                                     | fig 204722.5.peg.701                                                                                |
|                                                                                  | Dihydrolipoamide acetyltransferase component (E2) of acetoin dehydrogenase complex (EC 2.3.1.-)                   | fig 439375.7.peg.4288                                                     |                                                                                                     |
|                                                                                  | Dihydrolipoamide acetyltransferase component of pyruvate dehydrogenase complex (EC 2.3.1.12)                      | fig 439375.7.peg.2167                                                     | fig 204722.5.peg.1147                                                                               |
|                                                                                  | Dihydrolipoamide acyltransferase component of branched-chain alpha-keto acid dehydrogenase complex (EC 2.3.1.168) | fig 439375.7.peg.3712                                                     | fig 204722.5.peg.2255,<br>fig 204722.5.peg.2741,<br>fig 204722.5.peg.3307                           |
|                                                                                  | Dihydrolipoamide dehydrogenase of 2-oxoglutarate dehydrogenase (EC 1.8.1.4)                                       | fig 439375.7.peg.983                                                      | fig 204722.5.peg.1953                                                                               |
|                                                                                  | Dihydrolipoamide dehydrogenase of branched-chain alpha-keto acid dehydrogenase (EC 1.8.1.4)                       | fig 439375.7.peg.3713                                                     | fig 204722.5.peg.2742                                                                               |
|                                                                                  | Dihydrolipoamide succinyltransferase component (E2) of 2-oxoglutarate dehydrogenase complex (EC 2.3.1.61)         | fig 439375.7.peg.979                                                      | fig 204722.5.peg.1957                                                                               |
|                                                                                  | Enoyl-CoA hydratase [branched-chain amino acid degradation] (EC 4.2.1.17)                                         | fig 439375.7.peg.753                                                      | fig 204722.5.peg.2221,<br>fig 204722.5.peg.2439,<br>fig 204722.5.peg.3312                           |
|                                                                                  | Leucine-, isoleucine-, valine-, threonine-, and alanine-binding protein                                           | fig 439375.7.peg.3894                                                     | fig 204722.5.peg.2246,<br>fig 204722.5.peg.2861                                                     |
|                                                                                  | Pyruvate dehydrogenase E1 component (EC 1.2.4.1)                                                                  | fig 439375.7.peg.699                                                      |                                                                                                     |
|                                                                                  | Pyruvate dehydrogenase E1 component alpha subunit (EC 1.2.4.1)                                                    | fig 439375.7.peg.2165                                                     | fig 204722.5.peg.1149                                                                               |
|                                                                                  | Pyruvate dehydrogenase E1 component beta subunit (EC 1.2.4.1)                                                     | fig 439375.7.peg.2166                                                     | fig 204722.5.peg.1148                                                                               |
|                                                                                  | Dihydroxyacetone kinases                                                                                          | Dihydroxyacetone kinase, ATP-dependent (EC 2.7.1.29)                      | fig 439375.7.peg.3252                                                                               |
| Putative dihydroxyacetone kinase (EC 2.7.1.29), ADP-binding subunit              |                                                                                                                   | fig 439375.7.peg.4244,<br>fig 439375.7.peg.4246,<br>fig 439375.7.peg.4541 | fig 204722.5.peg.4244,<br>fig 204722.5.peg.1654,<br>fig 204722.5.peg.1656                           |
| Putative dihydroxyacetone kinase (EC 2.7.1.29), dihydroxyacetone binding subunit |                                                                                                                   | fig 439375.7.peg.4243,<br>fig 439375.7.peg.4245,<br>fig 439375.7.peg.4542 | fig 204722.5.peg.1655,<br>fig 204722.5.peg.1657                                                     |
|                                                                                  | 2-dehydro-3-deoxygluconate kinase (EC 2.7.1.45)                                                                   | fig 439375.7.peg.2498                                                     | fig 204722.5.peg.869                                                                                |
|                                                                                  | 2-dehydro-3-deoxyphosphogluconate aldolase (EC 4.1.2.14)                                                          | fig 439375.7.peg.4430                                                     | fig 204722.5.peg.2304                                                                               |
|                                                                                  | 6-phosphogluconolactonase (EC 3.1.1.31), eukaryotic type                                                          | fig 439375.7.peg.4130                                                     | fig 204722.5.peg.2992                                                                               |
|                                                                                  | D-glycerate 2-kinase (EC 2.7.1.-)                                                                                 | fig 439375.7.peg.491,<br>fig 439375.7.peg.4763                            | fig 204722.5.peg.371                                                                                |
|                                                                                  | Enolase (EC 4.2.1.11)                                                                                             | fig 439375.7.peg.2162,<br>fig 439375.7.peg.4764                           | fig 204722.5.peg.1152                                                                               |
|                                                                                  | Glucokinase (EC 2.7.1.2)                                                                                          | fig 439375.7.peg.1396                                                     | fig 204722.5.peg.3274                                                                               |
|                                                                                  | Gluconate dehydratase (EC 4.2.1.39)                                                                               | fig 439375.7.peg.3496,<br>fig 439375.7.peg.3925                           |                                                                                                     |

**Central carbohydrate metabolism**

|                                          |                                                                         |                        |                        |
|------------------------------------------|-------------------------------------------------------------------------|------------------------|------------------------|
| Entner-Doudoroff Pathway                 | Gluconokinase (EC 2.7.1.12)                                             | fig 439375.7.peg.3919  |                        |
|                                          | Gluconolactonase (EC 3.1.1.17)                                          | fig 439375.7.peg.4082  |                        |
|                                          | Glucose dehydrogenase, PQQ-dependent (EC 1.1.5.2)                       | fig 439375.7.peg.316   |                        |
|                                          | Glucose-6-phosphate 1-dehydrogenase (EC 1.1.1.49)                       | fig 439375.7.peg.4129  | fig 204722.5.peg.2991  |
|                                          | NAD-dependent glyceraldehyde-3-phosphate dehydrogenase (EC 1.2.1.12)    | fig 439375.7.peg.1242  | fig 204722.5.peg.1755  |
|                                          |                                                                         |                        | fig 204722.5.peg.2993, |
|                                          | Phosphogluconate dehydratase (EC 4.2.1.12)                              | fig 439375.7.peg.4131  | fig 204722.5.peg.2994  |
|                                          | Phosphoglycerate kinase (EC 2.7.2.3)                                    | fig 439375.7.peg.1240  | fig 204722.5.peg.1756  |
|                                          | Phosphoglycerate mutase (EC 5.4.2.1)                                    | fig 439375.7.peg.1391  | fig 204722.5.peg.3277  |
| Pyruvate kinase (EC 2.7.1.40)            | fig 439375.7.peg.1215                                                   | fig 204722.5.peg.1776  |                        |
| Glycolate, glyoxylate interconversions   | D-Lactate dehydrogenase, cytochrome c-dependent (EC 1.1.2.4)            | fig 439375.7.peg.1869  | fig 204722.5.peg.1436  |
|                                          | Glycolate dehydrogenase (EC 1.1.99.14), FAD-binding subunit GlcE        | fig 439375.7.peg.3162  | fig 204722.5.peg.2396  |
|                                          | Glycolate dehydrogenase (EC 1.1.99.14), iron-sulfur subunit GlcF        | fig 439375.7.peg.3163  | fig 204722.5.peg.2397  |
|                                          | Glycolate dehydrogenase (EC 1.1.99.14), subunit GlcD                    | fig 439375.7.peg.3161  | fig 204722.5.peg.2395  |
|                                          | Glycolate utilization operon transcriptional activator GlcC             | fig 439375.7.peg.3158  | fig 204722.5.peg.2392  |
|                                          | Glyoxylate reductase (EC 1.1.1.26)                                      | fig 439375.7.peg.774   | fig 204722.5.peg.2214  |
|                                          | Glyoxylate reductase (EC 1.1.1.79)                                      | fig 439375.7.peg.774   | fig 204722.5.peg.2214  |
|                                          | Hydroxypyruvate reductase (EC 1.1.1.81)                                 | fig 439375.7.peg.774   | fig 204722.5.peg.2214  |
|                                          | Phosphoglycolate phosphatase (EC 3.1.3.18)                              | fig 439375.7.peg.2197  | fig 204722.5.peg.1019  |
| Glycolysis and Gluconeogenesis           | Transcriptional regulator, LysR family, in glycolate utilization operon | fig 439375.7.peg.3160  | fig 204722.5.peg.2393  |
|                                          |                                                                         | fig 439375.7.peg.2162, |                        |
|                                          | Enolase (EC 4.2.1.11)                                                   | fig 439375.7.peg.4764  | fig 204722.5.peg.1152  |
|                                          | Fructose-1,6-bisphosphatase, GlpX type (EC 3.1.3.11)                    | fig 439375.7.peg.2020  | fig 204722.5.peg.1293  |
|                                          | Fructose-1,6-bisphosphatase, type I (EC 3.1.3.11)                       | fig 439375.7.peg.3050  | fig 204722.5.peg.3090  |
|                                          | Fructose-bisphosphate aldolase class I (EC 4.1.2.13)                    | fig 439375.7.peg.1238  |                        |
|                                          | Fructose-bisphosphate aldolase class II (EC 4.1.2.13)                   | fig 439375.7.peg.3051  | fig 204722.5.peg.3089  |
|                                          | Glucokinase (EC 2.7.1.2)                                                | fig 439375.7.peg.1396  | fig 204722.5.peg.3274  |
|                                          | Glucose-6-phosphate isomerase (EC 5.3.1.9)                              | fig 439375.7.peg.392   | fig 204722.5.peg.298   |
|                                          | NAD-dependent glyceraldehyde-3-phosphate dehydrogenase (EC 1.2.1.12)    | fig 439375.7.peg.1242  | fig 204722.5.peg.1755  |
|                                          | NADPH-dependent glyceraldehyde-3-phosphate dehydrogenase (EC 1.2.1.13)  | fig 439375.7.peg.1242  | fig 204722.5.peg.1755  |
|                                          | Phosphoglycerate kinase (EC 2.7.2.3)                                    | fig 439375.7.peg.1240  | fig 204722.5.peg.1756  |
|                                          | Phosphoglycerate mutase (EC 5.4.2.1)                                    | fig 439375.7.peg.1391  | fig 204722.5.peg.3277  |
| Pyruvate kinase (EC 2.7.1.40)            | fig 439375.7.peg.1215                                                   | fig 204722.5.peg.1776  |                        |
| Pyruvate,phosphate dikinase (EC 2.7.9.1) | fig 439375.7.peg.722                                                    | fig 204722.5.peg.515   |                        |
|                                          | fig 439375.7.peg.2156,                                                  | fig 204722.5.peg.1158, |                        |
| Triosephosphate isomerase (EC 5.3.1.1)   | fig 439375.7.peg.3053                                                   | fig 204722.5.peg.3087  |                        |
| Glyoxylate bypass                        | Aconitate hydratase (EC 4.2.1.3)                                        | fig 439375.7.peg.111   | fig 204722.5.peg.94    |
|                                          |                                                                         | fig 439375.7.peg.2147, |                        |
|                                          |                                                                         | fig 439375.7.peg.2207, |                        |
|                                          | Citrate synthase (si) (EC 2.3.3.1)                                      | fig 439375.7.peg.2208  | fig 204722.5.peg.1168  |
|                                          | Isocitrate lyase (EC 4.1.3.1)                                           | fig 439375.7.peg.4102  | fig 204722.5.peg.1641  |
|                                          |                                                                         |                        |                        |
|                                          | Malate dehydrogenase (EC 1.1.1.37)                                      | fig 439375.7.peg.975   | fig 204722.5.peg.1962  |

|                                                           |                                                                 |                                                                                                     |                                                                                                                               |
|-----------------------------------------------------------|-----------------------------------------------------------------|-----------------------------------------------------------------------------------------------------|-------------------------------------------------------------------------------------------------------------------------------|
|                                                           | Malate synthase G (EC 2.3.3.9)                                  | fig 439375.7.peg.1330                                                                               | fig 204722.5.peg.1675                                                                                                         |
| Methylglyoxal Metabolism                                  |                                                                 | fig 439375.7.peg.291,<br>fig 439375.7.peg.1348,<br>fig 439375.7.peg.1385,<br>fig 439375.7.peg.2980, | fig 204722.5.peg.209,<br>fig 204722.5.peg.1879,<br>fig 204722.5.peg.3239,<br>fig 204722.5.peg.3282,<br>fig 204722.5.peg.3385, |
|                                                           | Aldehyde dehydrogenase (EC 1.2.1.3)                             | fig 439375.7.peg.4960                                                                               | fig 204722.5.peg.3402                                                                                                         |
|                                                           | Aldehyde dehydrogenase A (EC 1.2.1.22)                          | fig 439375.7.peg.3946                                                                               | fig 204722.5.peg.2886                                                                                                         |
|                                                           | Aldehyde dehydrogenase B (EC 1.2.1.22)                          | fig 439375.7.peg.297,<br>fig 439375.7.peg.1529                                                      | fig 204722.5.peg.216,<br>fig 204722.5.peg.3126                                                                                |
|                                                           |                                                                 | fig 439375.7.peg.968,<br>fig 439375.7.peg.3688                                                      | fig 204722.5.peg.1970,<br>fig 204722.5.peg.2716                                                                               |
|                                                           | Hydroxyacylglutathione hydrolase (EC 3.1.2.6)                   |                                                                                                     | fig 204722.5.peg.60,<br>fig 204722.5.peg.1287,                                                                                |
|                                                           |                                                                 | fig 439375.7.peg.64,<br>fig 439375.7.peg.2023                                                       | fig 204722.5.peg.2251,<br>fig 204722.5.peg.3096                                                                               |
|                                                           | Lactoylglutathione lyase (EC 4.4.1.5)                           | fig 439375.7.peg.1397                                                                               | fig 204722.5.peg.3273                                                                                                         |
| Methylglyoxal synthase (EC 4.2.3.3)                       |                                                                 |                                                                                                     |                                                                                                                               |
| Pentose phosphate pathway                                 | 6-phosphogluconate dehydrogenase, decarboxylating (EC 1.1.1.44) | fig 439375.7.peg.4403                                                                               | fig 204722.5.peg.2329                                                                                                         |
|                                                           | 6-phosphogluconolactonase (EC 3.1.1.31), eukaryotic type        | fig 439375.7.peg.4130                                                                               | fig 204722.5.peg.2992                                                                                                         |
|                                                           | Fructose-6-phosphate phosphoketolase (EC 4.1.2.22)              | fig 439375.7.peg.4920                                                                               | fig 204722.5.peg.2597                                                                                                         |
|                                                           | Glucose-6-phosphate 1-dehydrogenase (EC 1.1.1.49)               | fig 439375.7.peg.4129                                                                               | fig 204722.5.peg.2991                                                                                                         |
|                                                           | Ribose 5-phosphate isomerase A (EC 5.3.1.6)                     | fig 439375.7.peg.2198                                                                               | fig 204722.5.peg.1021                                                                                                         |
|                                                           | Ribose 5-phosphate isomerase B (EC 5.3.1.6)                     | fig 439375.7.peg.3052                                                                               | fig 204722.5.peg.3088                                                                                                         |
|                                                           | Ribose-phosphate pyrophosphokinase (EC 2.7.6.1)                 | fig 439375.7.peg.1722                                                                               | fig 204722.5.peg.1557                                                                                                         |
|                                                           | Ribulose-phosphate 3-epimerase (EC 5.1.3.1)                     | fig 439375.7.peg.2506                                                                               | fig 204722.5.peg.860                                                                                                          |
|                                                           | Transaldolase (EC 2.2.1.2)                                      | fig 439375.7.peg.1149                                                                               | fig 204722.5.peg.1833                                                                                                         |
|                                                           |                                                                 | fig 439375.7.peg.1243,<br>fig 439375.7.peg.3049                                                     | fig 204722.5.peg.1754                                                                                                         |
|                                                           | Transketolase (EC 2.2.1.1)                                      | fig 439375.7.peg.4997                                                                               |                                                                                                                               |
|                                                           | Transketolase, C-terminal section (EC 2.2.1.1)                  | fig 439375.7.peg.4996                                                                               |                                                                                                                               |
|                                                           | Transketolase, N-terminal section (EC 2.2.1.1)                  |                                                                                                     |                                                                                                                               |
| Xylulose-5-phosphate phosphoketolase (EC 4.1.2.9)         | fig 439375.7.peg.4920                                           | fig 204722.5.peg.2597                                                                               |                                                                                                                               |
| Pyruvate Alanine Serine Interconversions                  | Alanine dehydrogenase (EC 1.4.1.1)                              | fig 439375.7.peg.4331                                                                               |                                                                                                                               |
|                                                           | Alanine racemase (EC 5.1.1.1)                                   | fig 439375.7.peg.1514                                                                               | fig 204722.5.peg.3140                                                                                                         |
|                                                           |                                                                 | fig 439375.7.peg.1734,                                                                              | fig 204722.5.peg.2880,                                                                                                        |
|                                                           | Branched-chain amino acid aminotransferase (EC 2.6.1.42)        | fig 439375.7.peg.3936                                                                               | fig 204722.5.peg.2881                                                                                                         |
|                                                           |                                                                 | fig 439375.7.peg.1496,<br>fig 439375.7.peg.3721,                                                    |                                                                                                                               |
|                                                           | D-alanine aminotransferase (EC 2.6.1.21)                        | fig 439375.7.peg.4781                                                                               | fig 204722.5.peg.3152                                                                                                         |
|                                                           |                                                                 | fig 439375.7.peg.1160,<br>fig 439375.7.peg.1513,<br>fig 439375.7.peg.3873,                          | fig 204722.5.peg.1820,<br>fig 204722.5.peg.1821,<br>fig 204722.5.peg.2843,                                                    |
|                                                           | D-amino acid dehydrogenase small subunit (EC 1.4.99.1)          | fig 439375.7.peg.4248                                                                               | fig 204722.5.peg.3141                                                                                                         |
|                                                           | D-serine/D-alanine/glycine transporter                          | fig 439375.7.peg.4448                                                                               | fig 204722.5.peg.2276                                                                                                         |
|                                                           | L-serine dehydratase (EC 4.3.1.17)                              | fig 439375.7.peg.2120                                                                               | fig 204722.5.peg.1194                                                                                                         |
|                                                           |                                                                 | fig 204722.5.peg.199,<br>fig 204722.5.peg.3143,<br>fig 204722.5.peg.3396,                           |                                                                                                                               |
|                                                           | fig 439375.7.peg.210,                                           |                                                                                                     |                                                                                                                               |
| Omega-amino acid--pyruvate aminotransferase (EC 2.6.1.18) | fig 439375.7.peg.1511                                           | fig 204722.5.peg.3397                                                                               |                                                                                                                               |

|                                                                                                           |                                                                                              |                                                 |                                                                                                                                                                                                                                                                                                                   |
|-----------------------------------------------------------------------------------------------------------|----------------------------------------------------------------------------------------------|-------------------------------------------------|-------------------------------------------------------------------------------------------------------------------------------------------------------------------------------------------------------------------------------------------------------------------------------------------------------------------|
| Pyruvate metabolism I: anaplerotic reactions, PEP                                                         | NAD-dependent malic enzyme (EC 1.1.1.38)                                                     | fig 439375.7.peg.2205                           | fig 204722.5.peg.1028                                                                                                                                                                                                                                                                                             |
|                                                                                                           | NADP-dependent malic enzyme (EC 1.1.1.40)                                                    | fig 439375.7.peg.168                            | fig 204722.5.peg.151,<br>fig 204722.5.peg.152                                                                                                                                                                                                                                                                     |
|                                                                                                           | Phosphoenolpyruvate carboxykinase [ATP] (EC 4.1.1.49)                                        | fig 439375.7.peg.874                            | fig 204722.5.peg.2126                                                                                                                                                                                                                                                                                             |
|                                                                                                           | Pyruvate carboxyl transferase (EC 6.4.1.1)                                                   | fig 439375.7.peg.1169,<br>fig 439375.7.peg.4770 | fig 204722.5.peg.1809                                                                                                                                                                                                                                                                                             |
|                                                                                                           | Pyruvate kinase (EC 2.7.1.40)                                                                | fig 439375.7.peg.1215                           | fig 204722.5.peg.1776                                                                                                                                                                                                                                                                                             |
|                                                                                                           | Pyruvate,phosphate dikinase (EC 2.7.9.1)                                                     | fig 439375.7.peg.722                            | fig 204722.5.peg.515                                                                                                                                                                                                                                                                                              |
|                                                                                                           | Acetate kinase (EC 2.7.2.1)                                                                  | fig 439375.7.peg.4919                           | fig 204722.5.peg.2598                                                                                                                                                                                                                                                                                             |
| Pyruvate metabolism II: acetyl-CoA, acetogenesis from pyruvate                                            | Acetyl-coenzyme A synthetase (EC 6.2.1.1)                                                    | fig 439375.7.peg.1142,<br>fig 439375.7.peg.1236 | fig 204722.5.peg.1758,<br>fig 204722.5.peg.1839,<br>fig 204722.5.peg.209,<br>fig 439375.7.peg.291,<br>fig 204722.5.peg.1879,<br>fig 439375.7.peg.1348,<br>fig 204722.5.peg.3239,<br>fig 439375.7.peg.1385,<br>fig 204722.5.peg.3282,<br>fig 439375.7.peg.2980,<br>fig 204722.5.peg.3385,<br>fig 439375.7.peg.4960 |
|                                                                                                           | Aldehyde dehydrogenase (EC 1.2.1.3)                                                          | fig 439375.7.peg.4960                           | fig 204722.5.peg.3402                                                                                                                                                                                                                                                                                             |
|                                                                                                           | Dihydrolipoamide acetyltransferase component of pyruvate dehydrogenase complex (EC 2.3.1.12) | fig 439375.7.peg.2167                           | fig 204722.5.peg.1147                                                                                                                                                                                                                                                                                             |
|                                                                                                           | Dihydrolipoamide dehydrogenase of pyruvate dehydrogenase complex (EC 1.8.1.4)                | fig 439375.7.peg.2169                           | fig 204722.5.peg.1146                                                                                                                                                                                                                                                                                             |
|                                                                                                           | Phosphate acetyltransferase (EC 2.3.1.8)                                                     | fig 439375.7.peg.3658                           |                                                                                                                                                                                                                                                                                                                   |
|                                                                                                           | Pyruvate dehydrogenase E1 component (EC 1.2.4.1)                                             | fig 439375.7.peg.699                            |                                                                                                                                                                                                                                                                                                                   |
|                                                                                                           | Pyruvate dehydrogenase E1 component alpha subunit (EC 1.2.4.1)                               | fig 439375.7.peg.2165                           | fig 204722.5.peg.1149                                                                                                                                                                                                                                                                                             |
|                                                                                                           | Pyruvate dehydrogenase E1 component beta subunit (EC 1.2.4.1)                                | fig 439375.7.peg.2166                           | fig 204722.5.peg.1148                                                                                                                                                                                                                                                                                             |
|                                                                                                           | 2-oxoglutarate dehydrogenase E1 component (EC 1.2.4.2)                                       | fig 439375.7.peg.978                            | fig 204722.5.peg.1958                                                                                                                                                                                                                                                                                             |
|                                                                                                           | Aconitate hydratase (EC 4.2.1.3)                                                             | fig 439375.7.peg.111                            | fig 204722.5.peg.94                                                                                                                                                                                                                                                                                               |
|                                                                                                           | TCA Cycle                                                                                    | Citrate synthase (si) (EC 2.3.3.1)              | fig 439375.7.peg.2147,<br>fig 439375.7.peg.2207,<br>fig 439375.7.peg.2208                                                                                                                                                                                                                                         |
| Dihydrolipoamide dehydrogenase of 2-oxoglutarate dehydrogenase (EC 1.8.1.4)                               |                                                                                              | fig 439375.7.peg.983                            | fig 204722.5.peg.1953                                                                                                                                                                                                                                                                                             |
| Dihydrolipoamide dehydrogenase of pyruvate dehydrogenase complex (EC 1.8.1.4)                             |                                                                                              | fig 439375.7.peg.2169                           | fig 204722.5.peg.1146                                                                                                                                                                                                                                                                                             |
| Dihydrolipoamide succinyltransferase component (E2) of 2-oxoglutarate dehydrogenase complex (EC 2.3.1.61) |                                                                                              | fig 439375.7.peg.979                            | fig 204722.5.peg.1957                                                                                                                                                                                                                                                                                             |
| Fumarate hydratase class I, aerobic (EC 4.2.1.2)                                                          |                                                                                              | fig 439375.7.peg.2340                           | fig 204722.5.peg.974                                                                                                                                                                                                                                                                                              |
| Fumarate hydratase class II (EC 4.2.1.2)                                                                  |                                                                                              | fig 439375.7.peg.3173                           | fig 204722.5.peg.2409                                                                                                                                                                                                                                                                                             |
| hypothetical protein that often co-occurs with aconitase                                                  |                                                                                              | fig 439375.7.peg.109                            | fig 204722.5.peg.92                                                                                                                                                                                                                                                                                               |
| Isocitrate dehydrogenase [NADP] (EC 1.1.1.42)                                                             |                                                                                              | fig 439375.7.peg.2094                           | fig 204722.5.peg.1218                                                                                                                                                                                                                                                                                             |
| Malate dehydrogenase (EC 1.1.1.37)                                                                        |                                                                                              | fig 439375.7.peg.975                            | fig 204722.5.peg.1962                                                                                                                                                                                                                                                                                             |
| Succinate dehydrogenase flavoprotein subunit (EC 1.3.99.1)                                                |                                                                                              | fig 439375.7.peg.998                            | fig 204722.5.peg.1936                                                                                                                                                                                                                                                                                             |
| Succinate dehydrogenase iron-sulfur protein (EC 1.3.99.1)                                                 |                                                                                              | fig 439375.7.peg.999                            | fig 204722.5.peg.1935                                                                                                                                                                                                                                                                                             |
| Succinyl-CoA ligase [ADP-forming] alpha chain (EC 6.2.1.5)                                                |                                                                                              | fig 439375.7.peg.977                            | fig 204722.5.peg.1960                                                                                                                                                                                                                                                                                             |
| Succinyl-CoA ligase [ADP-forming] beta chain (EC 6.2.1.5)                                                 |                                                                                              | fig 439375.7.peg.976                            | fig 204722.5.peg.1961                                                                                                                                                                                                                                                                                             |
| Fructose-1,6-bisphosphatase, GlpX type (EC 3.1.3.11)                                                      |                                                                                              | fig 439375.7.peg.2020                           | fig 204722.5.peg.1293                                                                                                                                                                                                                                                                                             |
| Fructose-1,6-bisphosphatase, type I (EC 3.1.3.11)                                                         |                                                                                              | fig 439375.7.peg.3050                           | fig 204722.5.peg.3090                                                                                                                                                                                                                                                                                             |

|                                                                                  |                                                                                                  |                                                                                                     |                                                                           |                                                               |                       |                       |
|----------------------------------------------------------------------------------|--------------------------------------------------------------------------------------------------|-----------------------------------------------------------------------------------------------------|---------------------------------------------------------------------------|---------------------------------------------------------------|-----------------------|-----------------------|
| CO2 fixation                                                                     | Calvin-Benson cycle                                                                              | Fructose-bisphosphate aldolase class I (EC 4.1.2.13)                                                | fig 439375.7.peg.1238                                                     |                                                               |                       |                       |
|                                                                                  |                                                                                                  | Fructose-bisphosphate aldolase class II (EC 4.1.2.13)                                               | fig 439375.7.peg.3051                                                     | fig 204722.5.peg.3089                                         |                       |                       |
|                                                                                  |                                                                                                  | NAD-dependent glyceraldehyde-3-phosphate dehydrogenase (EC 1.2.1.12)                                | fig 439375.7.peg.1242                                                     | fig 204722.5.peg.1755                                         |                       |                       |
|                                                                                  |                                                                                                  | NADPH-dependent glyceraldehyde-3-phosphate dehydrogenase (EC 1.2.1.13)                              | fig 439375.7.peg.1242                                                     | fig 204722.5.peg.1755                                         |                       |                       |
|                                                                                  |                                                                                                  | Phosphoglycerate kinase (EC 2.7.2.3)                                                                | fig 439375.7.peg.1240                                                     | fig 204722.5.peg.1756                                         |                       |                       |
|                                                                                  |                                                                                                  | Phosphoribulokinase (EC 2.7.1.19)                                                                   | fig 439375.7.peg.2893                                                     |                                                               |                       |                       |
|                                                                                  |                                                                                                  | Ribose 5-phosphate isomerase A (EC 5.3.1.6)                                                         | fig 439375.7.peg.2198                                                     | fig 204722.5.peg.1021                                         |                       |                       |
|                                                                                  |                                                                                                  | Ribose 5-phosphate isomerase B (EC 5.3.1.6)                                                         | fig 439375.7.peg.3052                                                     | fig 204722.5.peg.3088                                         |                       |                       |
|                                                                                  |                                                                                                  | Ribulose-phosphate 3-epimerase (EC 5.1.3.1)                                                         | fig 439375.7.peg.2506                                                     | fig 204722.5.peg.860                                          |                       |                       |
|                                                                                  |                                                                                                  | Transketolase (EC 2.2.1.1)                                                                          | fig 439375.7.peg.1243,<br>fig 439375.7.peg.3049                           | fig 204722.5.peg.1754                                         |                       |                       |
|                                                                                  |                                                                                                  | Transketolase, C-terminal section (EC 2.2.1.1)                                                      | fig 439375.7.peg.4997                                                     |                                                               |                       |                       |
|                                                                                  |                                                                                                  | Transketolase, N-terminal section (EC 2.2.1.1)                                                      | fig 439375.7.peg.4996                                                     |                                                               |                       |                       |
|                                                                                  |                                                                                                  | Triosephosphate isomerase (EC 5.3.1.1)                                                              | fig 439375.7.peg.2156,<br>fig 439375.7.peg.3053                           | fig 204722.5.peg.1158,<br>fig 204722.5.peg.3087               |                       |                       |
|                                                                                  |                                                                                                  | Di- and oligosaccharides                                                                            | Maltose and Maltodextrin Utilization                                      | Aldose 1-epimerase (EC 5.1.3.3)                               | fig 439375.7.peg.2499 | fig 204722.5.peg.868  |
|                                                                                  |                                                                                                  |                                                                                                     |                                                                           | Maltose operon transcriptional repressor MalR, LacI family    | fig 439375.7.peg.3087 | fig 204722.5.peg.2519 |
| Maltose/maltodextrin ABC transporter, permease protein MalF                      | fig 439375.7.peg.332,<br>fig 439375.7.peg.3089                                                   |                                                                                                     |                                                                           | fig 204722.5.peg.242,<br>fig 204722.5.peg.2521                |                       |                       |
| Maltose/maltodextrin ABC transporter, permease protein MalG                      | fig 439375.7.peg.333,<br>fig 439375.7.peg.375,<br>fig 439375.7.peg.386,<br>fig 439375.7.peg.3090 |                                                                                                     |                                                                           | fig 204722.5.peg.243,<br>fig 204722.5.peg.2522                |                       |                       |
| Maltose/maltodextrin ABC transporter, substrate binding periplasmic protein MalE | fig 439375.7.peg.331,<br>fig 439375.7.peg.3088                                                   |                                                                                                     |                                                                           | fig 204722.5.peg.241,<br>fig 204722.5.peg.2520                |                       |                       |
| Maltose/maltodextrin transport ATP-binding protein MalK (EC 3.6.3.19)            | fig 439375.7.peg.334,<br>fig 439375.7.peg.374,<br>fig 439375.7.peg.387,<br>fig 439375.7.peg.3091 |                                                                                                     |                                                                           | fig 204722.5.peg.244,<br>fig 204722.5.peg.2523                |                       |                       |
| Transcriptional activator of maltose regulon, MalT                               | fig 439375.7.peg.696                                                                             |                                                                                                     |                                                                           |                                                               |                       |                       |
| Trehalose Biosynthesis                                                           | Alpha,alpha-trehalose-phosphate synthase [UDP-forming] (EC 2.4.1.15)                             |                                                                                                     |                                                                           | fig 439375.7.peg.2862                                         |                       |                       |
|                                                                                  | Trehalose-6-phosphate phosphatase (EC 3.1.3.12)                                                  |                                                                                                     |                                                                           | fig 439375.7.peg.2863                                         |                       |                       |
| Acetoin, butanediol metabolism                                                   | Acetoin, butanediol metabolism                                                                   |                                                                                                     |                                                                           | Acetoin dehydrogenase E1 component alpha-subunit (EC 1.2.4.-) | fig 439375.7.peg.4290 |                       |
|                                                                                  |                                                                                                  |                                                                                                     | Acetoin dehydrogenase E1 component beta-subunit (EC 1.2.4.-)              | fig 439375.7.peg.4289                                         |                       |                       |
|                                                                                  |                                                                                                  |                                                                                                     | Acetolactate synthase large subunit (EC 2.2.1.6)                          | fig 439375.7.peg.1905                                         | fig 204722.5.peg.1414 |                       |
|                                                                                  |                                                                                                  | Acetolactate synthase small subunit (EC 2.2.1.6)                                                    | fig 439375.7.peg.1906                                                     | fig 204722.5.peg.1413                                         |                       |                       |
|                                                                                  |                                                                                                  | Dihydroloipoamide acetyltransferase component (E2) of acetoin dehydrogenase complex (EC 2.3.1.-)    | fig 439375.7.peg.4288                                                     |                                                               |                       |                       |
|                                                                                  | 3-hydroxyacyl-CoA dehydrogenase (EC 1.1.1.35)                                                    | fig 439375.7.peg.3071,<br>fig 439375.7.peg.4195,<br>fig 439375.7.peg.4206,<br>fig 439375.7.peg.4885 | fig 204722.5.peg.2440,<br>fig 204722.5.peg.3008,<br>fig 204722.5.peg.3311 |                                                               |                       |                       |
|                                                                                  | 3-hydroxybutyryl-CoA dehydratase (EC 4.2.1.55)                                                   | fig 439375.7.peg.919                                                                                | fig 204722.5.peg.2080                                                     |                                                               |                       |                       |

Carbohydrates

Fermentation

|                                            |                                                                       |                                                                                                                               |                                                                                                                               |                                                                           |
|--------------------------------------------|-----------------------------------------------------------------------|-------------------------------------------------------------------------------------------------------------------------------|-------------------------------------------------------------------------------------------------------------------------------|---------------------------------------------------------------------------|
| Acetyl-CoA fermentation to Butyrate        | 3-hydroxybutyryl-CoA dehydrogenase (EC 1.1.1.157)                     | fig 439375.7.peg.1062,<br>fig 439375.7.peg.4885                                                                               | fig 204722.5.peg.2006,<br>fig 204722.5.peg.2440,<br>fig 204722.5.peg.3311                                                     |                                                                           |
|                                            | 3-hydroxybutyryl-CoA epimerase (EC 5.1.2.3)                           | fig 439375.7.peg.4195,<br>fig 439375.7.peg.4206                                                                               | fig 204722.5.peg.3008                                                                                                         |                                                                           |
|                                            | Acetyl-CoA acetyltransferase (EC 2.3.1.9)                             | fig 439375.7.peg.1181,<br>fig 439375.7.peg.3257,<br>fig 439375.7.peg.3882,<br>fig 439375.7.peg.4196,<br>fig 439375.7.peg.4207 | fig 204722.5.peg.1799,<br>fig 204722.5.peg.2849,<br>fig 204722.5.peg.3009                                                     |                                                                           |
|                                            | Butyryl-CoA dehydrogenase (EC 1.3.99.2)                               | fig 439375.7.peg.3256,<br>fig 439375.7.peg.4180                                                                               | fig 204722.5.peg.2437,<br>fig 204722.5.peg.2665,<br>fig 204722.5.peg.3313                                                     |                                                                           |
|                                            | Electron transfer flavoprotein, alpha subunit                         | fig 439375.7.peg.1061                                                                                                         | fig 204722.5.peg.2007                                                                                                         |                                                                           |
|                                            | Electron transfer flavoprotein, beta subunit                          | fig 439375.7.peg.1060                                                                                                         | fig 204722.5.peg.2008                                                                                                         |                                                                           |
|                                            | Electron transfer flavoprotein-ubiquinone oxidoreductase (EC 1.5.5.1) | fig 439375.7.peg.2803                                                                                                         | fig 204722.5.peg.639                                                                                                          |                                                                           |
|                                            | Enoyl-CoA hydratase (EC 4.2.1.17)                                     | fig 439375.7.peg.564,<br>fig 439375.7.peg.4192,<br>fig 439375.7.peg.4195                                                      | fig 204722.5.peg.427                                                                                                          |                                                                           |
|                                            | Butanol Biosynthesis                                                  | 3-hydroxybutyryl-CoA dehydrogenase (EC 1.1.1.157)                                                                             | fig 439375.7.peg.1062,<br>fig 439375.7.peg.4885                                                                               | fig 204722.5.peg.2006,<br>fig 204722.5.peg.2440,<br>fig 204722.5.peg.3311 |
|                                            |                                                                       | Acetyl-CoA acetyltransferase (EC 2.3.1.9)                                                                                     | fig 439375.7.peg.1181,<br>fig 439375.7.peg.3257,<br>fig 439375.7.peg.3882,<br>fig 439375.7.peg.4196,<br>fig 439375.7.peg.4207 | fig 204722.5.peg.1799,<br>fig 204722.5.peg.2849,<br>fig 204722.5.peg.3009 |
| Butyryl-CoA dehydrogenase (EC 1.3.99.2)    |                                                                       | fig 439375.7.peg.3256,<br>fig 439375.7.peg.4180                                                                               | fig 204722.5.peg.2437,<br>fig 204722.5.peg.2665,<br>fig 204722.5.peg.3313                                                     |                                                                           |
| Enoyl-CoA hydratase (EC 4.2.1.17)          |                                                                       | fig 439375.7.peg.564,<br>fig 439375.7.peg.4192,<br>fig 439375.7.peg.4195                                                      | fig 204722.5.peg.427                                                                                                          |                                                                           |
| Fermentations: Lactate                     |                                                                       | Acetate kinase (EC 2.7.2.1)                                                                                                   | fig 439375.7.peg.4919                                                                                                         | fig 204722.5.peg.2598                                                     |
|                                            | Fructose-6-phosphate phosphoketolase (EC 4.1.2.22)                    | fig 439375.7.peg.4920                                                                                                         | fig 204722.5.peg.2597                                                                                                         |                                                                           |
|                                            | Phosphate acetyltransferase (EC 2.3.1.8)                              | fig 439375.7.peg.3658                                                                                                         |                                                                                                                               |                                                                           |
|                                            | Xylulose-5-phosphate phosphoketolase (EC 4.1.2.9)                     | fig 439375.7.peg.4920                                                                                                         | fig 204722.5.peg.2597                                                                                                         |                                                                           |
| Deoxyribose and Deoxynucleoside Catabolism | Deoxyribose operon repressor, DeoR family                             | fig 439375.7.peg.2988                                                                                                         |                                                                                                                               |                                                                           |
|                                            | Deoxyribose-phosphate aldolase (EC 4.1.2.4)                           | fig 439375.7.peg.2981                                                                                                         |                                                                                                                               |                                                                           |
|                                            | Putative deoxyribose-specific ABC transporter, permease protein       | fig 439375.7.peg.3791                                                                                                         |                                                                                                                               |                                                                           |
|                                            | Ribokinase (EC 2.7.1.15)                                              | fig 439375.7.peg.381,<br>fig 439375.7.peg.2609,<br>fig 439375.7.peg.2982,<br>fig 439375.7.peg.4234,<br>fig 439375.7.peg.4624  | fig 204722.5.peg.2227                                                                                                         |                                                                           |
|                                            | 2-dehydro-3-deoxygalactonokinase (EC 2.7.1.58)                        | fig 439375.7.peg.1491                                                                                                         | fig 204722.5.peg.3158                                                                                                         |                                                                           |

|                                               |                                                                                     |                                                                                                                                                                                   |                                                                           |
|-----------------------------------------------|-------------------------------------------------------------------------------------|-----------------------------------------------------------------------------------------------------------------------------------------------------------------------------------|---------------------------------------------------------------------------|
| D-galactonate catabolism                      | 2-dehydro-3-deoxyphosphogalactonate aldolase (EC 4.1.2.21)                          | fig 439375.7.peg.1492                                                                                                                                                             | fig 204722.5.peg.3157                                                     |
|                                               | D-galactonate transporter                                                           |                                                                                                                                                                                   | fig 204722.5.peg.1998                                                     |
|                                               | Galactonate dehydratase (EC 4.2.1.6)                                                | fig 439375.7.peg.1490                                                                                                                                                             | fig 204722.5.peg.3159                                                     |
| D-Galacturonate and D-Glucuronate Utilization | 2-dehydro-3-deoxyphosphogluconate aldolase (EC 4.1.2.14)                            | fig 439375.7.peg.4430                                                                                                                                                             | fig 204722.5.peg.2304                                                     |
|                                               | 6-phosphogluconate dehydrogenase, decarboxylating (EC 1.1.1.44)                     | fig 439375.7.peg.4403                                                                                                                                                             | fig 204722.5.peg.2329                                                     |
|                                               | Altronate hydrolase (EC 4.2.1.7)                                                    |                                                                                                                                                                                   | fig 204722.5.peg.3022                                                     |
|                                               | D-mannonate oxidoreductase (EC 1.1.1.57)                                            |                                                                                                                                                                                   | fig 204722.5.peg.3028,<br>fig 204722.5.peg.3029                           |
|                                               | Mannonate dehydratase (EC 4.2.1.8)                                                  |                                                                                                                                                                                   | fig 204722.5.peg.3032                                                     |
|                                               | Uronate isomerase (EC 5.3.1.12)                                                     |                                                                                                                                                                                   | fig 204722.5.peg.3030                                                     |
|                                               |                                                                                     |                                                                                                                                                                                   |                                                                           |
| D-gluconate and ketogluconates metabolism     | 2-dehydro-3-deoxygluconate kinase (EC 2.7.1.45)                                     | fig 439375.7.peg.2498                                                                                                                                                             | fig 204722.5.peg.869                                                      |
|                                               | 5-keto-D-gluconate 5-reductase (EC 1.1.1.69)                                        | fig 439375.7.peg.3920                                                                                                                                                             |                                                                           |
|                                               | Gluconate 2-dehydrogenase (EC 1.1.1.99.3), membrane-bound, cytochrome c             | fig 439375.7.peg.3768                                                                                                                                                             |                                                                           |
|                                               | Gluconate 2-dehydrogenase (EC 1.1.1.99.3), membrane-bound, flavoprotein             | fig 439375.7.peg.3769                                                                                                                                                             |                                                                           |
|                                               | Gluconate 2-dehydrogenase (EC 1.1.1.99.3), membrane-bound, gamma subunit            | fig 439375.7.peg.3770                                                                                                                                                             |                                                                           |
|                                               | Gluconokinase (EC 2.7.1.12)                                                         | fig 439375.7.peg.3919                                                                                                                                                             |                                                                           |
|                                               | Glucose dehydrogenase, PQQ-dependent (EC 1.1.5.2)                                   | fig 439375.7.peg.316                                                                                                                                                              |                                                                           |
|                                               | Low-affinity gluconate/H <sup>+</sup> symporter GntU                                | fig 439375.7.peg.4444                                                                                                                                                             |                                                                           |
|                                               | 2-dehydro-3-deoxygluconate kinase (EC 2.7.1.45)                                     | fig 439375.7.peg.2498                                                                                                                                                             | fig 204722.5.peg.869                                                      |
| D-ribose utilization                          |                                                                                     | fig 439375.7.peg.381,<br>fig 439375.7.peg.2609,<br>fig 439375.7.peg.2982,<br>fig 439375.7.peg.4234,<br>fig 439375.7.peg.4624                                                      | fig 204722.5.peg.2227                                                     |
|                                               | Ribokinase (EC 2.7.1.15)                                                            | fig 439375.7.peg.2198                                                                                                                                                             | fig 204722.5.peg.1021                                                     |
|                                               | Ribose 5-phosphate isomerase A (EC 5.3.1.6)                                         | fig 439375.7.peg.3052                                                                                                                                                             | fig 204722.5.peg.3088                                                     |
|                                               | Ribose 5-phosphate isomerase B (EC 5.3.1.6)                                         | fig 439375.7.peg.2950,<br>fig 439375.7.peg.2986,<br>fig 439375.7.peg.3213,<br>fig 439375.7.peg.3224,<br>fig 439375.7.peg.4079,<br>fig 439375.7.peg.4236,<br>fig 439375.7.peg.4239 | fig 204722.5.peg.1661,<br>fig 204722.5.peg.2231,<br>fig 204722.5.peg.3219 |
|                                               | Ribose ABC transport system, ATP-binding protein RbsA (TC 3.A.1.2.1)                | fig 439375.7.peg.4544,<br>fig 439375.7.peg.4619                                                                                                                                   |                                                                           |
|                                               | Ribose ABC transport system, high affinity permease RbsD (TC 3.A.1.2.1)             | fig 439375.7.peg.1944                                                                                                                                                             | fig 204722.5.peg.1361                                                     |
|                                               |                                                                                     | fig 439375.7.peg.2949,<br>fig 439375.7.peg.2987,<br>fig 439375.7.peg.3215,<br>fig 439375.7.peg.4237                                                                               |                                                                           |
|                                               | Ribose ABC transport system, periplasmic ribose-binding protein RbsB (TC 3.A.1.2.1) |                                                                                                                                                                                   |                                                                           |
|                                               |                                                                                     |                                                                                                                                                                                   |                                                                           |
|                                               |                                                                                     |                                                                                                                                                                                   |                                                                           |

Monosaccharides

|                        |                                                                     |                                                                                                                                                                                                                                                                                                                                                                                                                                                      |                                                                                                                               |
|------------------------|---------------------------------------------------------------------|------------------------------------------------------------------------------------------------------------------------------------------------------------------------------------------------------------------------------------------------------------------------------------------------------------------------------------------------------------------------------------------------------------------------------------------------------|-------------------------------------------------------------------------------------------------------------------------------|
|                        |                                                                     | fig 439375.7.peg.311,<br>fig 439375.7.peg.2951,<br>fig 439375.7.peg.2984,<br>fig 439375.7.peg.2985,<br>fig 439375.7.peg.3212,<br>fig 439375.7.peg.3225,<br>fig 439375.7.peg.3501,<br>fig 439375.7.peg.4080,<br>fig 439375.7.peg.4081,<br>fig 439375.7.peg.4235,<br>fig 439375.7.peg.4238,<br>fig 439375.7.peg.4240,<br>fig 439375.7.peg.4543,<br>fig 439375.7.peg.4546,<br>fig 439375.7.peg.4620,<br>fig 439375.7.peg.4621,<br>fig 439375.7.peg.4992 | fig 204722.5.peg.1660,<br>fig 204722.5.peg.2229,<br>fig 204722.5.peg.2230,<br>fig 204722.5.peg.3217,<br>fig 204722.5.peg.3218 |
|                        | Ribose ABC transport system, permease protein RbsC (TC 3.A.1.2.1)   | fig 439375.7.peg.315,<br>fig 439375.7.peg.4023                                                                                                                                                                                                                                                                                                                                                                                                       |                                                                                                                               |
|                        | Ribose operon repressor                                             | fig 439375.7.peg.137,<br>fig 439375.7.peg.189,<br>fig 439375.7.peg.310                                                                                                                                                                                                                                                                                                                                                                               |                                                                                                                               |
| Fructose utilization   | Fructokinase (EC 2.7.1.4)                                           | fig 439375.7.peg.74                                                                                                                                                                                                                                                                                                                                                                                                                                  |                                                                                                                               |
|                        | Fructokinase FrcK (EC 2.7.1.4)                                      | fig 439375.7.peg.73                                                                                                                                                                                                                                                                                                                                                                                                                                  |                                                                                                                               |
|                        | Fructose ABC transporter, ATP-binding component FrcA                | fig 439375.7.peg.72                                                                                                                                                                                                                                                                                                                                                                                                                                  |                                                                                                                               |
|                        | Fructose ABC transporter, permease component FrcC                   | fig 439375.7.peg.71                                                                                                                                                                                                                                                                                                                                                                                                                                  |                                                                                                                               |
|                        | Fructose ABC transporter, substrate-binding component FrcB          | fig 439375.7.peg.70                                                                                                                                                                                                                                                                                                                                                                                                                                  |                                                                                                                               |
|                        | Transcriptional regulator FrcR for fructose utilization, ROK family | fig 439375.7.peg.3946                                                                                                                                                                                                                                                                                                                                                                                                                                | fig 204722.5.peg.2886                                                                                                         |
|                        | Aldehyde dehydrogenase A (EC 1.2.1.22)                              | fig 439375.7.peg.1517                                                                                                                                                                                                                                                                                                                                                                                                                                | fig 204722.5.peg.3137                                                                                                         |
| L-rhamnose utilization | L-lactate dehydrogenase (EC 1.1.2.3)                                | fig 439375.7.peg.336,<br>fig 439375.7.peg.3726                                                                                                                                                                                                                                                                                                                                                                                                       |                                                                                                                               |
|                        | L-rhamnose mutarotase                                               | fig 439375.7.peg.3732                                                                                                                                                                                                                                                                                                                                                                                                                                |                                                                                                                               |
|                        | Predicted lactaldehyde dehydrogenase (EC 1.2.1.22)                  | fig 439375.7.peg.3729                                                                                                                                                                                                                                                                                                                                                                                                                                |                                                                                                                               |
|                        | Predicted L-rhamnose ABC transporter, ATP-binding component         | fig 439375.7.peg.3730                                                                                                                                                                                                                                                                                                                                                                                                                                |                                                                                                                               |
|                        | Predicted L-rhamnose ABC transporter, substrate-binding component   | fig 439375.7.peg.3727                                                                                                                                                                                                                                                                                                                                                                                                                                |                                                                                                                               |
|                        | Predicted L-rhamnose ABC transporter, transmembrane component 1     | fig 439375.7.peg.3728                                                                                                                                                                                                                                                                                                                                                                                                                                |                                                                                                                               |
|                        | Predicted L-rhamnose ABC transporter, transmembrane component 2     | fig 439375.7.peg.3733                                                                                                                                                                                                                                                                                                                                                                                                                                |                                                                                                                               |
|                        | Predicted L-rhamnose isomerase RhaI (EC 5.3.1.14)                   | fig 439375.7.peg.3732                                                                                                                                                                                                                                                                                                                                                                                                                                |                                                                                                                               |
|                        | Predicted rhamnulose-1-phosphate aldolase (EC 4.1.2.19)             | fig 439375.7.peg.3725                                                                                                                                                                                                                                                                                                                                                                                                                                |                                                                                                                               |
|                        | Rhamnulokinase RhaK in alpha-proteobacteria (EC 2.7.1.5)            | fig 439375.7.peg.3731                                                                                                                                                                                                                                                                                                                                                                                                                                |                                                                                                                               |
|                        | Transcriptional regulator of rhamnose utilization, DeoR family      | fig 439375.7.peg.1544                                                                                                                                                                                                                                                                                                                                                                                                                                |                                                                                                                               |
|                        | Beta-mannosidase (EC 3.2.1.25)                                      |                                                                                                                                                                                                                                                                                                                                                                                                                                                      |                                                                                                                               |

**One-carbon Metabolism**

|                                                                          |                                                                 |                                                                                                                               |                                                                           |
|--------------------------------------------------------------------------|-----------------------------------------------------------------|-------------------------------------------------------------------------------------------------------------------------------|---------------------------------------------------------------------------|
| Mannose Metabolism                                                       | Mannose-1-phosphate guanylyltransferase (GDP) (EC 2.7.7.22)     | fig 439375.7.peg.2864                                                                                                         | fig 204722.5.peg.557,<br>fig 204722.5.peg.2562                            |
|                                                                          | Mannose-6-phosphate isomerase (EC 5.3.1.8)                      | fig 439375.7.peg.2864                                                                                                         | fig 204722.5.peg.558,<br>fig 204722.5.peg.2562                            |
|                                                                          | Phosphomannomutase (EC 5.4.2.8)                                 | fig 439375.7.peg.2865                                                                                                         | fig 204722.5.peg.556,<br>fig 204722.5.peg.2563                            |
| Xylose utilization                                                       | 2-ketoglutaric semialdehyde dehydrogenase (EC 1.2.1.26)         |                                                                                                                               | fig 204722.5.peg.2612,<br>fig 204722.5.peg.3300                           |
|                                                                          | D-xylose transport ATP-binding protein XylG                     | fig 439375.7.peg.3564,<br>fig 439375.7.peg.3573                                                                               | fig 204722.5.peg.560,<br>fig 204722.5.peg.3382                            |
|                                                                          | Novel Xylose regulator from LacI family                         | fig 439375.7.peg.3571                                                                                                         | fig 204722.5.peg.567                                                      |
|                                                                          | Xylose ABC transporter, periplasmic xylose-binding protein XylF | fig 439375.7.peg.3572                                                                                                         | fig 204722.5.peg.3381                                                     |
|                                                                          |                                                                 | fig 439375.7.peg.3565,<br>fig 439375.7.peg.3574                                                                               | fig 204722.5.peg.561,<br>fig 204722.5.peg.3383                            |
|                                                                          | Xylose ABC transporter, permease protein XylH                   | fig 439375.7.peg.3569                                                                                                         | fig 204722.5.peg.565                                                      |
|                                                                          | Xylose isomerase (EC 5.3.1.5)                                   | fig 439375.7.peg.3570                                                                                                         | fig 204722.5.peg.566                                                      |
|                                                                          | Xylulose kinase (EC 2.7.1.17)                                   |                                                                                                                               |                                                                           |
|                                                                          |                                                                 |                                                                                                                               |                                                                           |
| One-carbon metabolism by tetrahydropterines                              | 5,10-methylenetetrahydrofolate reductase (EC 1.5.1.20)          | fig 439375.7.peg.1821                                                                                                         | fig 204722.5.peg.1478                                                     |
|                                                                          |                                                                 | fig 439375.7.peg.3127,<br>fig 439375.7.peg.3131                                                                               |                                                                           |
|                                                                          | 5-FCL-like protein                                              |                                                                                                                               |                                                                           |
|                                                                          | 5-formyltetrahydrofolate cyclo-ligase (EC 6.3.3.2)              | fig 439375.7.peg.1247                                                                                                         | fig 204722.5.peg.1750                                                     |
|                                                                          | Formyltetrahydrofolate deformylase (EC 3.5.1.10)                | fig 439375.7.peg.1528                                                                                                         | fig 204722.5.peg.3127                                                     |
|                                                                          | Methenyltetrahydrofolate cyclohydrolase (EC 3.5.4.9)            | fig 439375.7.peg.4132                                                                                                         | fig 204722.5.peg.2995                                                     |
| Serine-glyoxylate cycle                                                  | Methylenetetrahydrofolate dehydrogenase (NADP+) (EC 1.5.1.5)    | fig 439375.7.peg.4132                                                                                                         | fig 204722.5.peg.2995                                                     |
|                                                                          | 3-ketoacyl-CoA thiolase (EC 2.3.1.16)                           | fig 439375.7.peg.4207                                                                                                         | fig 204722.5.peg.3009                                                     |
|                                                                          | 5,10-methylenetetrahydrofolate reductase (EC 1.5.1.20)          | fig 439375.7.peg.1821                                                                                                         | fig 204722.5.peg.1478                                                     |
|                                                                          |                                                                 | fig 439375.7.peg.3127,<br>fig 439375.7.peg.3131                                                                               |                                                                           |
|                                                                          | 5-FCL-like protein                                              |                                                                                                                               |                                                                           |
|                                                                          | 5-formyltetrahydrofolate cyclo-ligase (EC 6.3.3.2)              | fig 439375.7.peg.1247                                                                                                         | fig 204722.5.peg.1750                                                     |
|                                                                          |                                                                 | fig 439375.7.peg.1181,<br>fig 439375.7.peg.3257,<br>fig 439375.7.peg.3882,<br>fig 439375.7.peg.4196,<br>fig 439375.7.peg.4207 | fig 204722.5.peg.1799,<br>fig 204722.5.peg.2849,<br>fig 204722.5.peg.3009 |
|                                                                          | Acetyl-CoA acetyltransferase (EC 2.3.1.9)                       | fig 439375.7.peg.4207                                                                                                         | fig 204722.5.peg.3009                                                     |
|                                                                          | Aconitate hydratase (EC 4.2.1.3)                                | fig 439375.7.peg.111                                                                                                          | fig 204722.5.peg.94                                                       |
|                                                                          |                                                                 | fig 439375.7.peg.2147,<br>fig 439375.7.peg.2207,<br>fig 439375.7.peg.2208                                                     | fig 204722.5.peg.1168                                                     |
|                                                                          | Citrate synthase (si) (EC 2.3.3.1)                              | fig 439375.7.peg.2162,                                                                                                        |                                                                           |
|                                                                          | Enolase (EC 4.2.1.11)                                           | fig 439375.7.peg.4764                                                                                                         | fig 204722.5.peg.1152                                                     |
|                                                                          | Fumarate hydratase class I, aerobic (EC 4.2.1.2)                | fig 439375.7.peg.2340                                                                                                         | fig 204722.5.peg.974                                                      |
|                                                                          | Isocitrate lyase (EC 4.1.3.1)                                   | fig 439375.7.peg.4102                                                                                                         | fig 204722.5.peg.1641                                                     |
|                                                                          | Malate dehydrogenase (EC 1.1.1.37)                              | fig 439375.7.peg.975                                                                                                          | fig 204722.5.peg.1962                                                     |
| Methenyltetrahydrofolate cyclohydrolase (EC 3.5.4.9)                     | fig 439375.7.peg.4132                                           | fig 204722.5.peg.2995                                                                                                         |                                                                           |
| Methylcrotonyl-CoA carboxylase biotin-containing subunit (EC 6.4.1.4)    | fig 439375.7.peg.40                                             | fig 204722.5.peg.20                                                                                                           |                                                                           |
| Methylcrotonyl-CoA carboxylase carboxyl transferase subunit (EC 6.4.1.4) | fig 439375.7.peg.39                                             | fig 204722.5.peg.21                                                                                                           |                                                                           |

|                                                                     |                                                                     |                                                                     |                                                  |                       |
|---------------------------------------------------------------------|---------------------------------------------------------------------|---------------------------------------------------------------------|--------------------------------------------------|-----------------------|
|                                                                     |                                                                     | Methylenetetrahydrofolate dehydrogenase (NADP+) (EC 1.5.1.5)        | fig 439375.7.peg.4132                            | fig 204722.5.peg.2995 |
|                                                                     |                                                                     | Methylmalonyl-CoA mutase (EC 5.4.99.2)                              | fig 439375.7.peg.2104                            | fig 204722.5.peg.1209 |
|                                                                     |                                                                     | Phosphoenolpyruvate carboxykinase [ATP] (EC 4.1.1.49)               | fig 439375.7.peg.874                             | fig 204722.5.peg.2126 |
|                                                                     |                                                                     | Propionyl-CoA carboxylase carboxyl transferase subunit (EC 6.4.1.3) | fig 439375.7.peg.2106                            | fig 204722.5.peg.1207 |
|                                                                     |                                                                     | Serine hydroxymethyltransferase (EC 2.1.2.1)                        | fig 439375.7.peg.2664                            | fig 204722.5.peg.776  |
|                                                                     |                                                                     | Succinate dehydrogenase flavoprotein subunit (EC 1.3.99.1)          | fig 439375.7.peg.998                             | fig 204722.5.peg.1936 |
|                                                                     |                                                                     | Succinate dehydrogenase iron-sulfur protein (EC 1.3.99.1)           | fig 439375.7.peg.999                             | fig 204722.5.peg.1935 |
|                                                                     |                                                                     | Succinyl-CoA ligase [ADP-forming] alpha chain (EC 6.2.1.5)          | fig 439375.7.peg.977                             | fig 204722.5.peg.1960 |
|                                                                     |                                                                     | Succinyl-CoA ligase [ADP-forming] beta chain (EC 6.2.1.5)           | fig 439375.7.peg.976                             | fig 204722.5.peg.1961 |
| Organic acids                                                       | Glycerate metabolism                                                | 2-dehydro-3-deoxyglucarate aldolase (EC 4.1.2.20)                   | fig 439375.7.peg.2510                            | fig 204722.5.peg.856  |
|                                                                     |                                                                     |                                                                     | fig 439375.7.peg.490,<br>fig 439375.7.peg.2354,  |                       |
|                                                                     |                                                                     | 2-hydroxy-3-oxopropionate reductase (EC 1.1.1.60)                   | fig 439375.7.peg.3924                            | fig 204722.5.peg.2366 |
|                                                                     |                                                                     |                                                                     | fig 439375.7.peg.491,                            |                       |
|                                                                     |                                                                     | D-glycerate 2-kinase (EC 2.7.1.-)                                   | fig 439375.7.peg.4763                            | fig 204722.5.peg.371  |
|                                                                     |                                                                     | Glyoxylate carboligase (EC 4.1.1.47)                                | fig 439375.7.peg.487                             |                       |
|                                                                     | Lactate utilization                                                 | Hydroxypyruvate isomerase (EC 5.3.1.22)                             | fig 439375.7.peg.489                             | fig 204722.5.peg.2364 |
|                                                                     |                                                                     | Hydroxypyruvate reductase (EC 1.1.1.81)                             | fig 439375.7.peg.774                             | fig 204722.5.peg.2214 |
|                                                                     |                                                                     | Pyruvate kinase (EC 2.7.1.40)                                       | fig 439375.7.peg.1215                            | fig 204722.5.peg.1776 |
|                                                                     |                                                                     | L-lactate dehydrogenase (EC 1.1.2.3)                                | fig 439375.7.peg.1517                            | fig 204722.5.peg.3137 |
|                                                                     |                                                                     | L-lactate permease                                                  | fig 439375.7.peg.1125                            | fig 204722.5.peg.732  |
|                                                                     |                                                                     | Propionyl-CoA to Succinyl-CoA Module                                | Methylmalonyl-CoA epimerase (EC 5.1.99.1)        | fig 439375.7.peg.2539 |
|                                                                     | Methylmalonyl-CoA mutase (EC 5.4.99.2)                              |                                                                     | fig 439375.7.peg.2104                            | fig 204722.5.peg.1209 |
|                                                                     | Propionyl-CoA carboxylase biotin-containing subunit (EC 6.4.1.3)    |                                                                     | fig 439375.7.peg.2105                            | fig 204722.5.peg.1208 |
|                                                                     | Propionyl-CoA carboxylase carboxyl transferase subunit (EC 6.4.1.3) |                                                                     | fig 439375.7.peg.2106                            | fig 204722.5.peg.1207 |
|                                                                     | Erythritol utilization                                              |                                                                     | fig 439375.7.peg.3058,<br>fig 439375.7.peg.3065, |                       |
|                                                                     |                                                                     | Erythritol kinase EryA (EC 2.7.1.27)                                | fig 439375.7.peg.3230                            | fig 204722.5.peg.3081 |
| Erythritol phosphate dehydrogenase EryB                             |                                                                     | fig 439375.7.peg.3057                                               | fig 204722.5.peg.3082                            |                       |
| Erythritol transcriptional regulator EryD                           |                                                                     | fig 439375.7.peg.3055                                               | fig 204722.5.peg.3084                            |                       |
| Possible D-erythrulose 4-phosphate dehydrogenase EryC (EC 1.1.1.-)  |                                                                     | fig 439375.7.peg.3056                                               | fig 204722.5.peg.3083                            |                       |
| Predicted erythritol ABC transporter 2, ATP-binding component       |                                                                     | fig 439375.7.peg.3060                                               | fig 204722.5.peg.3077                            |                       |
| Predicted erythritol ABC transporter 2, hypothetical lipoprotein    |                                                                     | fig 439375.7.peg.3059                                               | fig 204722.5.peg.3078                            |                       |
| Predicted erythritol ABC transporter 2, permease component          |                                                                     | fig 439375.7.peg.3061                                               | fig 204722.5.peg.3076                            |                       |
| Predicted erythritol ABC transporter 2, substrate-binding component |                                                                     | fig 439375.7.peg.3062                                               | fig 204722.5.peg.3074                            |                       |
|                                                                     |                                                                     | fig 439375.7.peg.289                                                | fig 204722.5.peg.207                             |                       |
|                                                                     | fig 439375.7.peg.1135,                                              |                                                                     |                                                  |                       |
|                                                                     | fig 439375.7.peg.2592                                               | fig 204722.5.peg.2660                                               |                                                  |                       |
|                                                                     | fig 439375.7.peg.2595                                               |                                                                     |                                                  |                       |

|                |                                                                          |                                                                                                       |                                                                                                                                                                                                            |                                                                           |                                                 |
|----------------|--------------------------------------------------------------------------|-------------------------------------------------------------------------------------------------------|------------------------------------------------------------------------------------------------------------------------------------------------------------------------------------------------------------|---------------------------------------------------------------------------|-------------------------------------------------|
| Sugar alcohols | Glycerol and Glycerol-3-phosphate Uptake and Utilization                 | Glycerol-3-phosphate ABC transporter, periplasmic glycerol-3-phosphate-binding protein (TC 3.A.1.1.3) | fig 439375.7.peg.1756,<br>fig 439375.7.peg.3914                                                                                                                                                            | fig 204722.5.peg.2868,<br>fig 204722.5.peg.2905,<br>fig 204722.5.peg.3411 |                                                 |
|                |                                                                          | Glycerol-3-phosphate dehydrogenase (EC 1.1.5.3)                                                       | fig 439375.7.peg.2593,<br>fig 439375.7.peg.3066,<br>fig 439375.7.peg.3228                                                                                                                                  |                                                                           |                                                 |
|                |                                                                          | Glycerol-3-phosphate dehydrogenase [NAD(P)+] (EC 1.1.1.94)                                            | fig 439375.7.peg.1019                                                                                                                                                                                      | fig 204722.5.peg.1923                                                     |                                                 |
|                |                                                                          | Glycerol-3-phosphate regulon repressor, DeoR family                                                   | fig 439375.7.peg.288                                                                                                                                                                                       | fig 204722.5.peg.206                                                      |                                                 |
|                |                                                                          | Glycerophosphoryl diester phosphodiesterase (EC 3.1.4.46)                                             | fig 439375.7.peg.2130                                                                                                                                                                                      | fig 204722.5.peg.1185                                                     |                                                 |
|                |                                                                          | SN-glycerol-3-phosphate transport ATP-binding protein UgpC (TC 3.A.1.1.3)                             | fig 439375.7.peg.679,<br>fig 439375.7.peg.1759,<br>fig 439375.7.peg.2610,<br>fig 439375.7.peg.2612,<br>fig 439375.7.peg.3866,<br>fig 439375.7.peg.3917,<br>fig 439375.7.peg.4151,<br>fig 439375.7.peg.4152 | fig 204722.5.peg.2871,<br>fig 204722.5.peg.3414                           |                                                 |
|                |                                                                          | SN-glycerol-3-phosphate transport system permease protein UgpA (TC 3.A.1.1.3)                         | fig 439375.7.peg.1758,<br>fig 439375.7.peg.3915,<br>fig 439375.7.peg.4153,<br>fig 439375.7.peg.4156                                                                                                        | fig 204722.5.peg.2869,<br>fig 204722.5.peg.3413                           |                                                 |
|                |                                                                          | SN-glycerol-3-phosphate transport system permease protein UgpE (TC 3.A.1.1.3)                         | fig 439375.7.peg.677,<br>fig 439375.7.peg.3916,<br>fig 439375.7.peg.4154                                                                                                                                   | fig 204722.5.peg.2870                                                     |                                                 |
|                |                                                                          | Inositol catabolism                                                                                   | 5-deoxy-glucuronate isomerase (EC 5.3.1.-)                                                                                                                                                                 | fig 439375.7.peg.4007                                                     | fig 204722.5.peg.2932<br>fig 204722.5.peg.2928, |
|                |                                                                          |                                                                                                       | 5-keto-2-deoxygluconokinase (EC 2.7.1.92)                                                                                                                                                                  | fig 439375.7.peg.4004                                                     | fig 204722.5.peg.2929                           |
|                |                                                                          |                                                                                                       | Epi-inositol hydrolase (EC 3.7.1.-)                                                                                                                                                                        | fig 439375.7.peg.4005                                                     | fig 204722.5.peg.2930                           |
|                |                                                                          |                                                                                                       | Inositol transport system ATP-binding protein                                                                                                                                                              | fig 439375.7.peg.1934                                                     | fig 204722.5.peg.1363                           |
|                |                                                                          |                                                                                                       | Inositol transport system permease protein                                                                                                                                                                 | fig 439375.7.peg.1933                                                     | fig 204722.5.peg.1364                           |
|                |                                                                          |                                                                                                       | Inosose dehydratase (EC 4.2.1.44)                                                                                                                                                                          | fig 439375.7.peg.4006                                                     | fig 204722.5.peg.2931                           |
|                | Inosose isomerase (EC 5.3.99.-)                                          |                                                                                                       | fig 439375.7.peg.3567                                                                                                                                                                                      | fig 204722.5.peg.563                                                      |                                                 |
|                | Myo-inositol 2-dehydrogenase (EC 1.1.1.18)                               |                                                                                                       | fig 439375.7.peg.1931,<br>fig 439375.7.peg.4002                                                                                                                                                            | fig 204722.5.peg.2926                                                     |                                                 |
|                | <b>Myo-inositol 2-dehydrogenase 2 (EC 1.1.1.18)</b>                      |                                                                                                       |                                                                                                                                                                                                            | fig 204722.5.peg.1367                                                     |                                                 |
|                | Predicted transcriptional regulator of the myo-inositol catabolic operon |                                                                                                       | fig 439375.7.peg.4003                                                                                                                                                                                      | fig 204722.5.peg.2927<br>fig 204722.5.peg.2928,                           |                                                 |
|                | uncharacterized domain                                                   |                                                                                                       | fig 439375.7.peg.4004                                                                                                                                                                                      | fig 204722.5.peg.2929                                                     |                                                 |
|                |                                                                          |                                                                                                       | Cell division protein BOLA                                                                                                                                                                                 | fig 439375.7.peg.954                                                      | fig 204722.5.peg.2061                           |
|                |                                                                          |                                                                                                       | Cell division protein FtsA                                                                                                                                                                                 | fig 439375.7.peg.1850                                                     | fig 204722.5.peg.1452                           |
|                |                                                                          | Cell division protein FtsH (EC 3.4.24.-)                                                              | fig 439375.7.peg.1278,<br>fig 439375.7.peg.1623,<br>fig 439375.7.peg.4642                                                                                                                                  | fig 204722.5.peg.1718                                                     |                                                 |
|                |                                                                          | Cell division protein FtsI [Peptidoglycan synthetase] (EC 2.4.1.129)                                  | fig 439375.7.peg.1839                                                                                                                                                                                      | fig 204722.5.peg.1463                                                     |                                                 |
|                |                                                                          | Cell division protein FtsJ                                                                            | fig 439375.7.peg.3977                                                                                                                                                                                      | fig 204722.5.peg.2897                                                     |                                                 |

Cell Division and Cell Cycle

Cell cycle in Prokaryota

|                                                                                   |                                                                                   |                            |                        |
|-----------------------------------------------------------------------------------|-----------------------------------------------------------------------------------|----------------------------|------------------------|
| Bacterial Cell Division                                                           | Cell division protein FtsK                                                        | fig 439375.7.peg.1006,     | fig 204722.5.peg.1929, |
|                                                                                   |                                                                                   | fig 439375.7.peg.3716      | fig 204722.5.peg.2745  |
|                                                                                   | Cell division protein FtsQ                                                        | fig 439375.7.peg.1849      | fig 204722.5.peg.1453  |
|                                                                                   | Cell division protein FtsW                                                        | fig 439375.7.peg.1844      | fig 204722.5.peg.1458  |
|                                                                                   | Cell division protein FtsX                                                        | fig 439375.7.peg.1032      | fig 204722.5.peg.2034  |
|                                                                                   | Cell division protein FtsZ (EC 3.4.24.-)                                          | fig 439375.7.peg.1851      | fig 204722.5.peg.1451  |
|                                                                                   | Cell division topological specificity factor MinE                                 | fig 439375.7.peg.3122      | fig 204722.5.peg.2539  |
|                                                                                   | Cell division transporter, ATP-binding protein FtsE (TC 3.A.5.1.1)                | fig 439375.7.peg.1031      | fig 204722.5.peg.2035  |
|                                                                                   | Cell division trigger factor (EC 5.2.1.8)                                         | fig 439375.7.peg.2400      | fig 204722.5.peg.912   |
|                                                                                   | Cytoplasmic axial filament protein CafA and Ribonuclease G (EC 3.1.4.-)           | fig 439375.7.peg.2387      | fig 204722.5.peg.927   |
|                                                                                   | GTP-binding protein Era                                                           | fig 439375.7.peg.2768      | fig 204722.5.peg.675   |
|                                                                                   | rRNA small subunit methyltransferase H                                            | fig 439375.7.peg.1837      | fig 204722.5.peg.1465  |
|                                                                                   |                                                                                   | fig 439375.7.peg.344,      | fig 204722.5.peg.257,  |
|                                                                                   | Septum formation protein Maf                                                      | fig 439375.7.peg.897       | fig 204722.5.peg.2103  |
|                                                                                   | Septum site-determining protein MinC                                              | fig 439375.7.peg.3120      | fig 204722.5.peg.2537  |
|                                                                                   | Septum site-determining protein MinD                                              | fig 439375.7.peg.3121      | fig 204722.5.peg.2538  |
|                                                                                   | Signal recognition particle receptor protein FtsY (=alpha subunit) (TC 3.A.5.1.1) | fig 439375.7.peg.970       | fig 204722.5.peg.1968  |
|                                                                                   | Bacterial Cytoskeleton                                                            | Cell division protein FtsA | fig 439375.7.peg.1850  |
| Cell division protein FtsI [Peptidoglycan synthetase] (EC 2.4.1.129)              |                                                                                   | fig 439375.7.peg.1839      | fig 204722.5.peg.1463  |
|                                                                                   |                                                                                   | fig 439375.7.peg.1006,     | fig 204722.5.peg.1929, |
| Cell division protein FtsK                                                        |                                                                                   | fig 439375.7.peg.3716      | fig 204722.5.peg.2745  |
| Cell division protein FtsQ                                                        |                                                                                   | fig 439375.7.peg.1849      | fig 204722.5.peg.1453  |
| Cell division protein FtsW                                                        |                                                                                   | fig 439375.7.peg.1844      | fig 204722.5.peg.1458  |
| Cell division protein FtsZ (EC 3.4.24.-)                                          |                                                                                   | fig 439375.7.peg.1851      | fig 204722.5.peg.1451  |
| Cell division topological specificity factor MinE                                 |                                                                                   | fig 439375.7.peg.3122      | fig 204722.5.peg.2539  |
|                                                                                   |                                                                                   | fig 439375.7.peg.906,      |                        |
| Chromosome (plasmid) partitioning protein ParA                                    |                                                                                   | fig 439375.7.peg.3337      | fig 204722.5.peg.2093  |
| Chromosome (plasmid) partitioning protein ParB                                    |                                                                                   | fig 439375.7.peg.907       | fig 204722.5.peg.2092  |
|                                                                                   |                                                                                   | fig 439375.7.peg.344,      | fig 204722.5.peg.257,  |
| Septum formation protein Maf                                                      |                                                                                   | fig 439375.7.peg.897       | fig 204722.5.peg.2103  |
| Septum site-determining protein MinC                                              |                                                                                   | fig 439375.7.peg.3120      | fig 204722.5.peg.2537  |
| Septum site-determining protein MinD                                              |                                                                                   | fig 439375.7.peg.3121      | fig 204722.5.peg.2538  |
| Sporulation initiation inhibitor protein Soj                                      |                                                                                   | fig 439375.7.peg.906       | fig 204722.5.peg.2093  |
| Stage 0 sporulation protein J                                                     |                                                                                   | fig 439375.7.peg.907       | fig 204722.5.peg.2092  |
| Two cell division clusters relating to chromosome partitioning                    |                                                                                   |                            | fig 439375.7.peg.906,  |
|                                                                                   | Chromosome (plasmid) partitioning protein ParA                                    | fig 439375.7.peg.3337      | fig 204722.5.peg.2093  |
|                                                                                   | Chromosome (plasmid) partitioning protein ParB                                    | fig 439375.7.peg.907       | fig 204722.5.peg.2092  |
|                                                                                   | Chromosome partition protein smc                                                  | fig 439375.7.peg.652       | fig 204722.5.peg.512   |
|                                                                                   | Ribonuclease III (EC 3.1.26.3)                                                    | fig 439375.7.peg.2769      | fig 204722.5.peg.674   |
|                                                                                   | Segregation and condensation protein A                                            | fig 439375.7.peg.2477      | fig 204722.5.peg.891   |
|                                                                                   |                                                                                   | fig 439375.7.peg.2476,     |                        |
|                                                                                   | Segregation and condensation protein B                                            | fig 439375.7.peg.4897      | fig 204722.5.peg.892   |
| Signal recognition particle receptor protein FtsY (=alpha subunit) (TC 3.A.5.1.1) | fig 439375.7.peg.970                                                              | fig 204722.5.peg.1968      |                        |
| Signal recognition particle, subunit Ffh SRP54 (TC 3.A.5.1.1)                     | fig 439375.7.peg.1126                                                             | fig 204722.5.peg.1856      |                        |

|                                           |                             |                                                                                                 |                                                                                                                               |                                                                                                      |
|-------------------------------------------|-----------------------------|-------------------------------------------------------------------------------------------------|-------------------------------------------------------------------------------------------------------------------------------|------------------------------------------------------------------------------------------------------|
| Capsular and extracellular polysacchrides | dTDP-rhamnose synthesis     | dTDP-4-dehydrorhamnose 3,5-epimerase (EC 5.1.3.13)                                              | fig 439375.7.peg.2869,<br>fig 439375.7.peg.3546                                                                               | fig 204722.5.peg.2654                                                                                |
|                                           |                             | dTDP-4-dehydrorhamnose reductase (EC 1.1.1.133)                                                 | fig 439375.7.peg.2867                                                                                                         |                                                                                                      |
|                                           |                             |                                                                                                 | fig 439375.7.peg.649,<br>fig 439375.7.peg.2868,<br>fig 439375.7.peg.4594                                                      |                                                                                                      |
|                                           |                             | dTDP-glucose 4,6-dehydratase (EC 4.2.1.46)                                                      | fig 439375.7.peg.4594                                                                                                         |                                                                                                      |
|                                           |                             | Glucose-1-phosphate cytidilyltransferase (EC 2.7.7.33)                                          | fig 439375.7.peg.3548                                                                                                         |                                                                                                      |
|                                           |                             | Glucose-1-phosphate thymidilyltransferase (EC 2.7.7.24)                                         | fig 439375.7.peg.2870                                                                                                         |                                                                                                      |
|                                           | Rhamnose containing glycans | Alpha-D-GlcNAc alpha-1,2-L-rhamnosyltransferase (EC 2.4.1.-)                                    | fig 439375.7.peg.417                                                                                                          |                                                                                                      |
|                                           |                             |                                                                                                 | fig 439375.7.peg.2869,<br>fig 439375.7.peg.3546                                                                               | fig 204722.5.peg.2654                                                                                |
|                                           |                             | dTDP-4-dehydrorhamnose 3,5-epimerase (EC 5.1.3.13)                                              | fig 439375.7.peg.3546                                                                                                         | fig 204722.5.peg.2654                                                                                |
|                                           |                             | dTDP-4-dehydrorhamnose reductase (EC 1.1.1.133)                                                 | fig 439375.7.peg.2867                                                                                                         |                                                                                                      |
|                                           |                             |                                                                                                 | fig 439375.7.peg.649,<br>fig 439375.7.peg.2868,<br>fig 439375.7.peg.4594                                                      |                                                                                                      |
|                                           |                             | dTDP-glucose 4,6-dehydratase (EC 4.2.1.46)                                                      | fig 439375.7.peg.4594                                                                                                         |                                                                                                      |
|                                           | Sialic Acid Metabolism      | Glucosamine-1-phosphate N-acetyltransferase (EC 2.3.1.157)                                      | fig 439375.7.peg.3805                                                                                                         | fig 204722.5.peg.2799                                                                                |
|                                           |                             | Glucosamine--fructose-6-phosphate aminotransferase [isomerizing] (EC 2.6.1.16)                  | fig 439375.7.peg.3804                                                                                                         | fig 204722.5.peg.2798                                                                                |
|                                           |                             | N-acetylglucosamine-1-phosphate uridyltransferase (EC 2.7.7.23)                                 | fig 439375.7.peg.3805                                                                                                         | fig 204722.5.peg.2799                                                                                |
|                                           |                             | N-acetylglucosamine-6-phosphate deacetylase (EC 3.5.1.25)                                       | fig 439375.7.peg.1525                                                                                                         | fig 204722.5.peg.3129                                                                                |
|                                           |                             | N-acetylmannosamine kinase (EC 2.7.1.60)                                                        | fig 439375.7.peg.3646                                                                                                         | fig 204722.5.peg.2624                                                                                |
|                                           |                             | N-acetylmannosamine-6-phosphate 2-epimerase (EC 5.1.3.9)                                        |                                                                                                                               | fig 204722.5.peg.2624                                                                                |
|                                           |                             | Phosphoglucosamine mutase (EC 5.4.2.10)                                                         | fig 439375.7.peg.1280                                                                                                         | fig 204722.5.peg.1717                                                                                |
|                                           |                             | Sialic acid utilization regulator, RpiR family                                                  | fig 439375.7.peg.3272                                                                                                         |                                                                                                      |
|                                           |                             | Sialic acid-induced transmembrane protein YjhT(NanM), possible mutarotase                       |                                                                                                                               | fig 204722.5.peg.2625,<br>fig 204722.5.peg.2626                                                      |
|                                           |                             | TRAP-type transport system, small permease component, predicted N-acetylneuraminase transporter | fig 439375.7.peg.3927,<br>fig 439375.7.peg.4608                                                                               |                                                                                                      |
|                                           |                             | Beta N-acetyl-glucosaminidase (EC 3.2.1.52)                                                     | fig 439375.7.peg.2478                                                                                                         | fig 204722.5.peg.890                                                                                 |
|                                           |                             |                                                                                                 | fig 439375.7.peg.944,<br>fig 439375.7.peg.1481,<br>fig 439375.7.peg.2123,<br>fig 439375.7.peg.2182,<br>fig 439375.7.peg.2263, | fig 204722.5.peg.1003,<br>fig 204722.5.peg.1086,<br>fig 204722.5.peg.1191,<br>fig 204722.5.peg.2071, |
|                                           |                             | D-alanyl-D-alanine carboxypeptidase (EC 3.4.16.4)                                               | fig 439375.7.peg.3900                                                                                                         | fig 204722.5.peg.3168                                                                                |
|                                           |                             | Membrane-bound lytic murein transglycosylase A precursor (EC 3.2.1.-)                           | fig 439375.7.peg.890                                                                                                          | fig 204722.5.peg.2111                                                                                |
|                                           |                             |                                                                                                 |                                                                                                                               |                                                                                                      |
|                                           |                             |                                                                                                 |                                                                                                                               |                                                                                                      |

Cell Wall and Capsule

Cell Wall and Capsule

|                                                                                                                                    |                                                                         |                        |                        |
|------------------------------------------------------------------------------------------------------------------------------------|-------------------------------------------------------------------------|------------------------|------------------------|
| Murein Hydrolases                                                                                                                  |                                                                         | fig 439375.7.peg.25,   | fig 204722.5.peg.35,   |
|                                                                                                                                    |                                                                         | fig 439375.7.peg.1124, | fig 204722.5.peg.1474, |
|                                                                                                                                    | Membrane-bound lytic murein transglycosylase B precursor (EC 3.2.1.-)   | fig 439375.7.peg.1823, | fig 204722.5.peg.1475, |
|                                                                                                                                    |                                                                         | fig 439375.7.peg.4446  | fig 204722.5.peg.1858, |
|                                                                                                                                    | Membrane-bound lytic murein transglycosylase D precursor (EC 3.2.1.-)   | fig 439375.7.peg.4732, | fig 204722.5.peg.2289  |
|                                                                                                                                    |                                                                         | fig 439375.7.peg.4736  |                        |
|                                                                                                                                    |                                                                         | fig 439375.7.peg.1830, | fig 204722.5.peg.928,  |
| N-acetylmuramoyl-L-alanine amidase (EC 3.5.1.28)                                                                                   | fig 439375.7.peg.2385                                                   | fig 204722.5.peg.1470  |                        |
|                                                                                                                                    |                                                                         | fig 439375.7.peg.2784  | fig 204722.5.peg.658   |
| Peptidoglycan Biosynthesis                                                                                                         | Cell division protein FtsI [Peptidoglycan synthetase] (EC 2.4.1.129)    | fig 439375.7.peg.1839  | fig 204722.5.peg.1463  |
|                                                                                                                                    |                                                                         |                        | fig 204722.5.peg.1291, |
|                                                                                                                                    | D-alanine--D-alanine ligase (EC 6.3.2.4)                                | fig 439375.7.peg.1848  | fig 204722.5.peg.1454  |
|                                                                                                                                    |                                                                         | fig 439375.7.peg.944,  |                        |
|                                                                                                                                    |                                                                         | fig 439375.7.peg.1481, | fig 204722.5.peg.1003, |
|                                                                                                                                    |                                                                         | fig 439375.7.peg.2123, | fig 204722.5.peg.1086, |
|                                                                                                                                    |                                                                         | fig 439375.7.peg.2182, | fig 204722.5.peg.1191, |
|                                                                                                                                    |                                                                         | fig 439375.7.peg.2263, | fig 204722.5.peg.2071, |
|                                                                                                                                    | D-alanyl-D-alanine carboxypeptidase (EC 3.4.16.4)                       | fig 439375.7.peg.3900  | fig 204722.5.peg.3168  |
|                                                                                                                                    | Glucosamine-1-phosphate N-acetyltransferase (EC 2.3.1.157)              | fig 439375.7.peg.3805  | fig 204722.5.peg.2799  |
|                                                                                                                                    |                                                                         | fig 439375.7.peg.868,  |                        |
|                                                                                                                                    | Glutamate racemase (EC 5.1.1.3)                                         | fig 439375.7.peg.2098  | fig 204722.5.peg.1214  |
|                                                                                                                                    | Glutamine synthetase type I (EC 6.3.1.2)                                | fig 439375.7.peg.2193  | fig 204722.5.peg.1015  |
|                                                                                                                                    | Glutamine synthetase type II, eukaryotic (EC 6.3.1.2)                   | fig 439375.7.peg.4328  |                        |
|                                                                                                                                    |                                                                         |                        | fig 204722.5.peg.35,   |
|                                                                                                                                    |                                                                         | fig 439375.7.peg.25,   | fig 204722.5.peg.1474, |
|                                                                                                                                    |                                                                         | fig 439375.7.peg.1124, | fig 204722.5.peg.1475, |
|                                                                                                                                    | Membrane-bound lytic murein transglycosylase B precursor (EC 3.2.1.-)   | fig 439375.7.peg.1823, | fig 204722.5.peg.1858, |
|                                                                                                                                    |                                                                         | fig 439375.7.peg.4446  | fig 204722.5.peg.2289  |
|                                                                                                                                    | Monofunctional biosynthetic peptidoglycan transglycosylase (EC 2.4.2.-) | fig 439375.7.peg.1177  | fig 204722.5.peg.1803  |
|                                                                                                                                    | fig 439375.7.peg.139,                                                   |                        |                        |
|                                                                                                                                    | fig 439375.7.peg.2384,                                                  | fig 204722.5.peg.121,  |                        |
| Multimodular transpeptidase-transglycosylase (EC 2.4.1.129) (EC 3.4.-)                                                             | fig 439375.7.peg.2822,                                                  | fig 204722.5.peg.599,  |                        |
|                                                                                                                                    | fig 439375.7.peg.3605                                                   | fig 204722.5.peg.930   |                        |
| N-acetylglucosamine-1-phosphate uridylyltransferase (EC 2.7.7.23)                                                                  | fig 439375.7.peg.3805                                                   | fig 204722.5.peg.2799  |                        |
| Phospho-N-acetylmuramoyl-pentapeptide-transferase (EC 2.7.8.13)                                                                    | fig 439375.7.peg.1842                                                   | fig 204722.5.peg.1460  |                        |
| Rare lipoprotein A precursor                                                                                                       | fig 439375.7.peg.2181                                                   | fig 204722.5.peg.1002  |                        |
| UDP-N-acetylenolpyruvoylglucosamine reductase (EC 1.1.1.158)                                                                       | fig 439375.7.peg.1847                                                   | fig 204722.5.peg.1455  |                        |
| UDP-N-acetylglucosamine 1-carboxyvinyltransferase (EC 2.5.1.7)                                                                     | fig 439375.7.peg.350,                                                   | fig 204722.5.peg.263   |                        |
|                                                                                                                                    | fig 439375.7.peg.3273                                                   |                        |                        |
| UDP-N-acetylglucosamine--N-acetylmuramyl-(pentapeptide) pyrophosphoryl-undecaprenol N-acetylglucosamine transferase (EC 2.4.1.227) | fig 439375.7.peg.1845                                                   | fig 204722.5.peg.1457  |                        |

|                                         |                                                                                                    |                        |                       |
|-----------------------------------------|----------------------------------------------------------------------------------------------------|------------------------|-----------------------|
|                                         | UDP-N-acetylmuramate--alanine ligase (EC 6.3.2.8)                                                  | fig 439375.7.peg.1846  | fig 204722.5.peg.1456 |
|                                         | UDP-N-acetylmuramoylalanine--D-glutamate ligase (EC 6.3.2.9)                                       | fig 439375.7.peg.1843  | fig 204722.5.peg.1459 |
|                                         | UDP-N-acetylmuramoylalanyl-D-glutamate--2,6-diaminopimelate ligase (EC 6.3.2.13)                   | fig 439375.7.peg.1840  | fig 204722.5.peg.1462 |
|                                         | UDP-N-acetylmuramoylalanyl-D-glutamyl-2,6-diaminopimelate--D-alanyl-D-alanine ligase (EC 6.3.2.10) | fig 439375.7.peg.1841  | fig 204722.5.peg.1461 |
| Recycling of Peptidoglycan Amino Acids  | AmpG permease                                                                                      | fig 439375.7.peg.3417  |                       |
|                                         | N-acetylmuramoyl-L-alanine amidase (EC 3.5.1.28)                                                   | fig 439375.7.peg.1830, | fig 204722.5.peg.928, |
|                                         |                                                                                                    | fig 439375.7.peg.2385  | fig 204722.5.peg.1470 |
| Recycling of Peptidoglycan Amino Sugars | Anhydro-N-acetylmuramic acid kinase (EC 2.7.1.-)                                                   | fig 439375.7.peg.3281  | fig 204722.5.peg.942  |
|                                         | Beta N-acetyl-glucosaminidase (EC 3.2.1.52)                                                        | fig 439375.7.peg.2478  | fig 204722.5.peg.890  |
|                                         | N-acetylmuramic acid 6-phosphate etherase (EC 4.2.-.-)                                             | fig 439375.7.peg.3275  |                       |
| UDP-N-acetylmuramate from Fructose      | Glucosamine-1-phosphate N-acyltransferase (EC 2.3.1.157)                                           | fig 439375.7.peg.3805  | fig 204722.5.peg.2799 |
|                                         | Glucosamine-6-phosphate deaminase [isomerizing], alternative (EC 3.5.99.6)                         | fig 439375.7.peg.1524  | fig 204722.5.peg.3130 |
|                                         | Glucosamine--fructose-6-phosphate aminotransferase [isomerizing] (EC 2.6.1.16)                     | fig 439375.7.peg.3804  | fig 204722.5.peg.2798 |
|                                         | N-acetylglucosamine-1-phosphate uridylyltransferase (EC 2.7.7.23)                                  | fig 439375.7.peg.3805  | fig 204722.5.peg.2799 |
|                                         | N-acetylglucosamine-6-phosphate deacetylase (EC 3.5.1.25)                                          | fig 439375.7.peg.1525  | fig 204722.5.peg.3129 |
|                                         | N-acetylmuramic acid 6-phosphate etherase (EC 4.2.-.-)                                             | fig 439375.7.peg.3275  |                       |
|                                         | Phosphoglucosamine mutase (EC 5.4.2.10)                                                            | fig 439375.7.peg.1280  | fig 204722.5.peg.1717 |
|                                         | UDP-N-acetylenolpyruvoylglucosamine reductase (EC 1.1.1.158)                                       | fig 439375.7.peg.1847  | fig 204722.5.peg.1455 |
|                                         | UDP-N-acetylglucosamine 1-carboxyvinyltransferase (EC 2.5.1.7)                                     | fig 439375.7.peg.350,  | fig 439375.7.peg.3273 |
|                                         |                                                                                                    | fig 439375.7.peg.3273  | fig 204722.5.peg.263  |
| KDO2-Lipid A biosynthesis               | 2-Keto-3-deoxy-D-manno-octulosonate-8-phosphate synthase (EC 2.5.1.55)                             | fig 439375.7.peg.2161  | fig 204722.5.peg.1153 |
|                                         | 3-deoxy-D-manno-octulosonic-acid transferase (EC 2.-.-.-)                                          | fig 439375.7.peg.3197  | fig 204722.5.peg.2432 |
|                                         | 3-deoxy-manno-octulosonate cytidylyltransferase (EC 2.7.7.38)                                      | fig 439375.7.peg.17    | fig 204722.5.peg.42   |
|                                         | Acyl-[acyl-carrier-protein]--UDP-N-acetylglucosamine O-acyltransferase (EC 2.3.1.129)              | fig 439375.7.peg.2144  | fig 204722.5.peg.1171 |
|                                         | Lipid A biosynthesis lauroyl acyltransferase (EC 2.3.1.-)                                          | fig 439375.7.peg.2505  | fig 204722.5.peg.861  |
|                                         | Lipid A export ATP-binding/permease protein MsbA (EC 3.6.3.25)                                     | fig 439375.7.peg.1394  | fig 204722.5.peg.3275 |
|                                         | Lipid-A-disaccharide synthase (EC 2.4.1.182)                                                       | fig 439375.7.peg.2146  | fig 204722.5.peg.1169 |
|                                         | Lipopolysaccharide ABC transporter, ATP-binding protein LptB                                       | fig 439375.7.peg.180   | fig 204722.5.peg.163  |
|                                         | Protein of unknown function DUF1009 clustered with KDO2-Lipid A biosynthesis genes                 | fig 439375.7.peg.2145  | fig 204722.5.peg.1170 |
|                                         | Tetraacyldisaccharide 4&#39;-kinase (EC 2.7.1.130)                                                 | fig 439375.7.peg.3198  | fig 204722.5.peg.2433 |
|                                         | UDP-3-O-[3-hydroxymyristoyl] glucosamine N-acyltransferase (EC 2.3.1.-)                            | fig 439375.7.peg.2142  | fig 204722.5.peg.1173 |
|                                         | UDP-3-O-[3-hydroxymyristoyl] N-acetylglucosamine deacetylase (EC 3.5.1.-)                          | fig 439375.7.peg.1852  | fig 204722.5.peg.1449 |

Gram-Negative cell wall components

|                                                          |                                                           |                                                                                     |                                                                                                                              |                                                                |                       |                       |
|----------------------------------------------------------|-----------------------------------------------------------|-------------------------------------------------------------------------------------|------------------------------------------------------------------------------------------------------------------------------|----------------------------------------------------------------|-----------------------|-----------------------|
|                                                          | Lipid A-Ara4N pathway ( Polymyxin resistance )            | Polymyxin resistance protein ArnC, glycosyl transferase (EC 2.4.-.-)                |                                                                                                                              | fig 204722.5.peg.2355                                          |                       |                       |
|                                                          |                                                           | Polymyxin resistance protein ArnT, undecaprenyl phosphate-alpha-L-Ara4N transferase |                                                                                                                              | fig 204722.5.peg.2357                                          |                       |                       |
|                                                          |                                                           | UDP-glucose dehydrogenase (EC 1.1.1.22)                                             | fig 439375.7.peg.1810,<br>fig 439375.7.peg.4591                                                                              | fig 204722.5.peg.2760                                          |                       |                       |
|                                                          | Lipopolysaccharide-related cluster in Alphaproteobacteria | 3-deoxy-D-manno-octulosonic-acid transferase (EC 2.-.-.-)                           | fig 439375.7.peg.3197                                                                                                        | fig 204722.5.peg.2432                                          |                       |                       |
|                                                          |                                                           | FIG043197: Inositol monophosphatase family protein                                  | fig 439375.7.peg.3194                                                                                                        | fig 204722.5.peg.2429                                          |                       |                       |
|                                                          |                                                           | Lipid A export ATP-binding/permease protein MsbA (EC 3.6.3.25)                      | fig 439375.7.peg.1394                                                                                                        | fig 204722.5.peg.3275                                          |                       |                       |
|                                                          |                                                           | Murein endopeptidase                                                                | fig 439375.7.peg.1398                                                                                                        | fig 204722.5.peg.3272                                          |                       |                       |
|                                                          |                                                           | Protein of unknown function DUF374                                                  | fig 439375.7.peg.3196                                                                                                        | fig 204722.5.peg.2431                                          |                       |                       |
|                                                          |                                                           | Tetraacyldisaccharide 4&#39;-kinase (EC 2.7.1.130)                                  | fig 439375.7.peg.3198                                                                                                        | fig 204722.5.peg.2433                                          |                       |                       |
|                                                          |                                                           | TldE/PmbA protein, part of proposed TldE/TldD proteolytic complex (PMID 12029038)   | fig 439375.7.peg.3193                                                                                                        | fig 204722.5.peg.2428                                          |                       |                       |
| Uncharacterized protein, Bsl7517 homolog                 | fig 439375.7.peg.3195                                     | fig 204722.5.peg.2430                                                               |                                                                                                                              |                                                                |                       |                       |
| Biotin                                                   | Biotin biosynthesis                                       | 3-ketoacyl-CoA thiolase (EC 2.3.1.16)                                               | fig 439375.7.peg.4207                                                                                                        | fig 204722.5.peg.3009                                          |                       |                       |
|                                                          |                                                           | 8-amino-7-oxononanoate synthase (EC 2.3.1.47)                                       | fig 439375.7.peg.2964                                                                                                        | fig 204722.5.peg.2711                                          |                       |                       |
|                                                          |                                                           | Adenosylmethionine-8-amino-7-oxononanoate aminotransferase (EC 2.6.1.62)            | fig 439375.7.peg.2997                                                                                                        | fig 204722.5.peg.2709                                          |                       |                       |
|                                                          |                                                           | Biotin synthase (EC 2.8.1.6)                                                        | fig 439375.7.peg.2965                                                                                                        | fig 204722.5.peg.2712                                          |                       |                       |
|                                                          |                                                           | Biotin synthesis protein bioZ                                                       | fig 439375.7.peg.2961                                                                                                        | fig 204722.5.peg.2708                                          |                       |                       |
|                                                          |                                                           | Biotin-protein ligase (EC 6.3.4.15)                                                 | fig 439375.7.peg.2541                                                                                                        | fig 204722.5.peg.826                                           |                       |                       |
|                                                          |                                                           | Dethiobiotin synthetase (EC 6.3.3.3)                                                | fig 439375.7.peg.2963                                                                                                        | fig 204722.5.peg.2710                                          |                       |                       |
|                                                          |                                                           | Long-chain-fatty-acid-CoA ligase (EC 6.2.1.3)                                       | fig 439375.7.peg.396,<br>fig 439375.7.peg.2839                                                                               | fig 204722.5.peg.302                                           |                       |                       |
|                                                          |                                                           | predicted biotin regulatory protein BioR (GntR family)                              | fig 439375.7.peg.1252                                                                                                        | fig 204722.5.peg.1745                                          |                       |                       |
|                                                          |                                                           | Substrate-specific component BioY of biotin ECF transporter                         | fig 439375.7.peg.729,<br>fig 439375.7.peg.1251                                                                               | fig 204722.5.peg.522,<br>fig 204722.5.peg.1746                 |                       |                       |
|                                                          |                                                           | Coenzyme A                                                                          | Coenzyme A Biosynthesis                                                                                                      | 3-methyl-2-oxobutanoate hydroxymethyltransferase (EC 2.1.2.11) | fig 439375.7.peg.454  | fig 204722.5.peg.343  |
|                                                          |                                                           |                                                                                     |                                                                                                                              | Dephospho-CoA kinase (EC 2.7.1.24)                             | fig 439375.7.peg.895  | fig 204722.5.peg.2105 |
|                                                          |                                                           |                                                                                     |                                                                                                                              | Ketol-acid reductoisomerase (EC 1.1.1.86)                      | fig 439375.7.peg.1914 | fig 204722.5.peg.1405 |
| Pantoate-beta-alanine ligase (EC 6.3.2.1)                | fig 439375.7.peg.453                                      |                                                                                     |                                                                                                                              | fig 204722.5.peg.342                                           |                       |                       |
| Pantothenate kinase (EC 2.7.1.33)                        | fig 439375.7.peg.877                                      |                                                                                     |                                                                                                                              | fig 204722.5.peg.2124                                          |                       |                       |
| Phosphopantetheine adenylyltransferase (EC 2.7.7.3)      | fig 439375.7.peg.2290                                     |                                                                                     |                                                                                                                              | fig 204722.5.peg.1116                                          |                       |                       |
| Phosphopantothenoylecysteine decarboxylase (EC 4.1.1.36) | fig 439375.7.peg.1379                                     |                                                                                     |                                                                                                                              | fig 204722.5.peg.3288                                          |                       |                       |
| Phosphopantothenoylecysteine synthetase (EC 6.3.2.5)     | fig 439375.7.peg.1379                                     |                                                                                     |                                                                                                                              | fig 204722.5.peg.3288                                          |                       |                       |
|                                                          |                                                           | 5-FCL-like protein                                                                  | fig 439375.7.peg.3127,<br>fig 439375.7.peg.3131                                                                              |                                                                |                       |                       |
|                                                          |                                                           | Glycine oxidase ThiO (EC 1.4.3.19)                                                  | fig 439375.7.peg.304                                                                                                         | fig 204722.5.peg.223                                           |                       |                       |
|                                                          |                                                           | Hydroxymethylpyrimidine ABC transporter, ATPase component                           | fig 439375.7.peg.4749                                                                                                        |                                                                |                       |                       |
|                                                          |                                                           | Hydroxymethylpyrimidine ABC transporter, substrate-binding component                | fig 439375.7.peg.300,<br>fig 439375.7.peg.3130,<br>fig 439375.7.peg.3749,<br>fig 439375.7.peg.4042,<br>fig 439375.7.peg.4748 | fig 204722.5.peg.219,<br>fig 204722.5.peg.2501                 |                       |                       |

**Cofactors, Vitamins,  
Prosthetic Groups, Pigments**

Thiamin biosynthesis

|                                                                  |                                             |                                             |
|------------------------------------------------------------------|---------------------------------------------|---------------------------------------------|
|                                                                  | fig 439375.7.p.298,<br>fig 439375.7.p.3750, |                                             |
| Hydroxymethylpyrimidine ABC transporter, transmembrane component | fig 439375.7.p.4039,<br>fig 439375.7.p.4750 | fig 204722.5.p.217,<br>fig 204722.5.p.2502  |
| Phosphomethylpyrimidine kinase (EC 2.7.4.7)                      | fig 439375.7.p.305                          | fig 204722.5.p.224                          |
| Sulfur carrier protein ThiS                                      | fig 439375.7.p.303                          | fig 204722.5.p.222                          |
| Thiamin ABC transporter, ATPase component                        | fig 439375.7.p.1193                         | fig 204722.5.p.1786                         |
| Thiamin ABC transporter, substrate-binding component             | fig 439375.7.p.1195                         | fig 204722.5.p.1784                         |
| Thiamin ABC transporter, transmembrane component                 | fig 439375.7.p.1194,<br>fig 439375.7.p.4401 | fig 204722.5.p.1785,<br>fig 204722.5.p.2331 |
| Thiamin pyrophosphokinase (EC 2.7.6.2)                           | fig 439375.7.p.1196                         | fig 204722.5.p.1783                         |
| Thiaminase II (EC 3.5.99.2)                                      | fig 439375.7.p.299,<br>fig 439375.7.p.528   | fig 204722.5.p.218                          |
| Thiamin-phosphate pyrophosphorylase (EC 2.5.1.3)                 | fig 439375.7.p.301,<br>fig 439375.7.p.1262  | fig 204722.5.p.220,<br>fig 204722.5.p.1734  |
| Thiazole biosynthesis protein ThiG                               | fig 439375.7.p.302                          | fig 204722.5.p.221                          |

Folate Biosynthesis

|                                                                                   |                                             |                     |
|-----------------------------------------------------------------------------------|---------------------------------------------|---------------------|
| 2-amino-4-hydroxy-6-hydroxymethylidihydropteridine pyrophosphokinase (EC 2.7.6.3) | fig 439375.7.p.2223                         | fig 204722.5.p.1043 |
| 5-formyltetrahydrofolate cyclo-ligase (EC 6.3.3.2)                                | fig 439375.7.p.1247                         | fig 204722.5.p.1750 |
| Aminodeoxychorismate lyase (EC 4.1.3.38)                                          | fig 439375.7.p.4435                         | fig 204722.5.p.2299 |
| Dihydrofolate reductase (EC 1.5.1.3)                                              | fig 439375.7.p.1387,<br>fig 439375.7.p.1894 | fig 204722.5.p.1423 |
| Dihydrofolate synthase (EC 6.3.2.12)                                              | fig 439375.7.p.859                          | fig 204722.5.p.2143 |
| Dihydroneopterin aldolase (EC 4.1.2.25)                                           | fig 439375.7.p.2222                         | fig 204722.5.p.1042 |
| Dihydropteroate synthase (EC 2.5.1.15)                                            | fig 439375.7.p.2221                         | fig 204722.5.p.1041 |
| FoIM Alternative dihydrofolate reductase 1                                        | fig 439375.7.p.2727                         | fig 204722.5.p.712  |
| Folylpolyglutamate synthase (EC 6.3.2.17)                                         | fig 439375.7.p.859                          | fig 204722.5.p.2143 |
| GTP cyclohydrolase I (EC 3.5.4.16) type 1                                         | fig 439375.7.p.2266                         | fig 204722.5.p.1089 |
| Methionyl-tRNA formyltransferase (EC 2.1.2.9)                                     | fig 439375.7.p.1410                         | fig 204722.5.p.3259 |
| Methylenetetrahydrofolate dehydrogenase (NADP+) (EC 1.5.1.5)                      | fig 439375.7.p.4132                         | fig 204722.5.p.2995 |
| Para-aminobenzoate synthase, amidotransferase component (EC 2.6.1.85)             | fig 439375.7.p.1682                         | fig 204722.5.p.1596 |
| Para-aminobenzoate synthase, aminase component (EC 2.6.1.85)                      | fig 439375.7.p.4434                         | fig 204722.5.p.2300 |
| Serine hydroxymethyltransferase (EC 2.1.2.1)                                      | fig 439375.7.p.2664                         | fig 204722.5.p.776  |
| Thymidylate synthase (EC 2.1.1.45)                                                | fig 439375.7.p.1893                         | fig 204722.5.p.1424 |

**Folate and pterines**

Molybdenum cofactor biosynthesis

|                                                                                        |                     |                     |
|----------------------------------------------------------------------------------------|---------------------|---------------------|
| GTP cyclohydrolase I (EC 3.5.4.16) type 1                                              | fig 439375.7.p.2266 | fig 204722.5.p.1089 |
| GTP cyclohydrolase II (EC 3.5.4.25)                                                    | fig 439375.7.p.577  | fig 204722.5.p.444  |
| Molybdate-binding domain of MoDE                                                       | fig 439375.7.p.3521 |                     |
| Molybdenum ABC transporter, periplasmic molybdenum-binding protein ModA (TC 3.A.1.8.1) | fig 439375.7.p.4427 | fig 204722.5.p.2309 |
| Molybdenum cofactor biosynthesis protein MoaA                                          | fig 439375.7.p.2346 | fig 204722.5.p.971  |
| Molybdenum cofactor biosynthesis protein MoaC                                          | fig 439375.7.p.2152 | fig 204722.5.p.1162 |
| Molybdenum cofactor biosynthesis protein MoaD                                          |                     | fig 204722.5.p.709  |
| Molybdenum cofactor biosynthesis protein MoaE                                          | fig 439375.7.p.2731 | fig 204722.5.p.708  |
| Molybdenum transport ATP-binding protein ModC (TC 3.A.1.8.1)                           | fig 439375.7.p.4425 | fig 204722.5.p.2311 |

itamins, Prosthetic Groups, Pigments

|              |                                           |                                                                       |                        |                        |
|--------------|-------------------------------------------|-----------------------------------------------------------------------|------------------------|------------------------|
|              | Molybdenum cofactor biosynthesis          | Molybdenum transport system permease protein ModB (TC 3.A.1.8.1)      | fig 439375.7.peg.4426  | fig 204722.5.peg.2310  |
|              |                                           | Molybdopterin biosynthesis enzyme                                     | fig 439375.7.peg.48    | fig 204722.5.peg.44    |
|              |                                           | Molybdopterin biosynthesis Mog protein, molybdochelatase              | fig 439375.7.peg.3681  | fig 204722.5.peg.2714  |
|              |                                           | Molybdopterin biosynthesis protein MoeA                               | fig 439375.7.peg.2151  | fig 204722.5.peg.1163  |
|              |                                           | Molybdopterin biosynthesis protein MoeB                               | fig 439375.7.peg.6     | fig 204722.5.peg.5     |
|              |                                           | Molybdopterin-guanine dinucleotide biosynthesis protein MobA          | fig 439375.7.peg.2348  | fig 204722.5.peg.970   |
|              |                                           | Molybdopterin-guanine dinucleotide biosynthesis protein MobB          | fig 439375.7.peg.2349  | fig 204722.5.peg.969   |
|              | Pterin carbinolamine dehydratase          | 4-hydroxyphenylpyruvate dioxygenase (EC 1.13.11.27)                   | fig 439375.7.peg.4605  |                        |
|              |                                           | Fumarylacetoacetate hydrolase family protein                          | fig 439375.7.peg.3926  | fig 204722.5.peg.66    |
|              |                                           | Pterin-4-alpha-carbinolamine dehydratase (EC 4.2.1.96)                | fig 439375.7.peg.97    | fig 204722.5.peg.84    |
| Lipoic acid  | Lipoic acid metabolism                    | Biotin-protein ligase (EC 6.3.4.15)                                   | fig 439375.7.peg.2541  | fig 204722.5.peg.826   |
|              |                                           | Lipoate synthase                                                      | fig 439375.7.peg.2171  | fig 204722.5.peg.1144  |
|              |                                           | Lipoate-protein ligase A                                              | fig 439375.7.peg.2329  |                        |
|              |                                           | Octanoate-[acyl-carrier-protein]-protein-N-octanoyltransferase        | fig 439375.7.peg.3817  | fig 204722.5.peg.2805  |
| NAD and NADP | NAD and NADP cofactor biosynthesis global | 3-hydroxyanthranilate 3,4-dioxygenase (EC 1.13.11.6)                  | fig 439375.7.peg.4578  |                        |
|              |                                           | ADP-ribose pyrophosphatase (EC 3.6.1.13)                              | fig 439375.7.peg.4315  |                        |
|              |                                           | Amidases related to nicotinamidase                                    | fig 439375.7.peg.4489, |                        |
|              |                                           | Glutamine amidotransferase chain of NAD synthetase                    | fig 439375.7.peg.4664  |                        |
|              |                                           | lojap protein                                                         | fig 439375.7.peg.2203  | fig 204722.5.peg.1026  |
|              |                                           | Isochorismatase (EC 3.3.2.1) of siderophore biosynthesis              | fig 439375.7.peg.1107  | fig 204722.5.peg.1873  |
|              |                                           | L-aspartate oxidase (EC 1.4.3.16)                                     | fig 439375.7.peg.457   | fig 204722.5.peg.2236  |
|              |                                           | NAD kinase (EC 2.7.1.23)                                              | fig 439375.7.peg.2367  |                        |
|              |                                           | NAD synthetase (EC 6.3.1.5)                                           | fig 439375.7.peg.2203  | fig 204722.5.peg.952   |
|              |                                           | Niacin transporter NiaP                                               | fig 439375.7.peg.3724  | fig 204722.5.peg.1026  |
|              |                                           | Nicotinamidase (EC 3.5.1.19)                                          | fig 439375.7.peg.1804  | fig 204722.5.peg.2747  |
|              |                                           | Nicotinamidase family protein YcaC                                    | fig 439375.7.peg.4157, | fig 204722.5.peg.1491  |
|              |                                           | Nicotinate phosphoribosyltransferase (EC 2.4.2.11)                    | fig 439375.7.peg.4161  |                        |
|              |                                           | Nicotinate-nucleotide adenylyltransferase (EC 2.7.7.18)               | fig 439375.7.peg.133   | fig 204722.5.peg.116   |
|              |                                           | NMN 5&#39;nucleotidase, extracellular (EC 3.1.3.5)                    | fig 439375.7.peg.1105  | fig 204722.5.peg.1874  |
|              |                                           | Quinolinate phosphoribosyltransferase [decarboxylating] (EC 2.4.2.19) | fig 439375.7.peg.2630  |                        |
|              |                                           | Quinolinate synthetase (EC 4.1.99.-)                                  | fig 439375.7.peg.458   |                        |
|              |                                           | 1-deoxy-D-xylulose 5-phosphate synthase (EC 2.2.1.7)                  | fig 439375.7.peg.456   |                        |
|              |                                           | 4-hydroxythreonine-4-phosphate dehydrogenase (EC 1.1.1.262)           | fig 439375.7.peg.584   | fig 204722.5.peg.451   |
|              |                                           |                                                                       | fig 439375.7.peg.2746, |                        |
|              |                                           |                                                                       | fig 439375.7.peg.3247  | fig 204722.5.peg.695   |
|              |                                           |                                                                       | fig 439375.7.peg.10,   |                        |
|              |                                           |                                                                       | fig 439375.7.peg.1286, |                        |
|              |                                           |                                                                       | fig 439375.7.peg.1445, | fig 204722.5.peg.6,    |
|              |                                           |                                                                       | fig 439375.7.peg.3254, | fig 204722.5.peg.1712, |
|              |                                           |                                                                       | fig 439375.7.peg.3908, | fig 204722.5.peg.2671, |
| Buridevine   | Buridevin (Vitamin B6) Biosynthesis       | D-3-phosphoglycerate dehydrogenase (EC 1.1.1.95)                      | fig 439375.7.peg.4999  | fig 204722.5.peg.3205  |

Cofactors, VI

|                                               |                                     |                                                                         |                        |                        |
|-----------------------------------------------|-------------------------------------|-------------------------------------------------------------------------|------------------------|------------------------|
| Pyridoxine                                    | Pyridoxin (vitamin B6) biosynthesis | NAD-dependent glyceraldehyde-3-phosphate dehydrogenase (EC 1.2.1.12)    | fig 439375.7.peg.1242  | fig 204722.5.peg.1755  |
|                                               |                                     | Phosphoserine aminotransferase (EC 2.6.1.52)                            | fig 439375.7.peg.1285  | fig 204722.5.peg.1714  |
|                                               |                                     | Predicted transcriptional regulator of pyridoxine metabolism            | fig 439375.7.peg.4308  |                        |
|                                               |                                     | Pyridoxal kinase (EC 2.7.1.35)                                          | fig 439375.7.peg.4310  | fig 204722.5.peg.1860  |
|                                               |                                     | Pyridoxamine 5-phosphate oxidase (EC 1.4.3.5)                           | fig 439375.7.peg.568   | fig 204722.5.peg.432   |
|                                               |                                     | Pyridoxine 5-phosphate synthase (EC 2.6.99.2)                           | fig 439375.7.peg.1911  | fig 204722.5.peg.1409  |
|                                               |                                     |                                                                         |                        |                        |
| Quinone cofactors                             | Ubiquinone Biosynthesis             | 2-octaprenyl-6-methoxyphenol hydroxylase (EC 1.14.13.-)                 | fig 439375.7.peg.1002, | fig 204722.5.peg.1933, |
|                                               |                                     | 3-demethylubiquinone-9 3-methyltransferase (EC 2.1.1.64)                | fig 439375.7.peg.3796  | fig 204722.5.peg.2789  |
|                                               |                                     |                                                                         | fig 439375.7.peg.1083  | fig 204722.5.peg.1907  |
|                                               |                                     | 3-polyprenyl-4-hydroxybenzoate carboxy-lyase (EC 4.1.1.-)               | fig 439375.7.peg.3268, |                        |
|                                               |                                     | 3-polyprenyl-4-hydroxybenzoate carboxy-lyase UbiX (EC 4.1.1.-)          | fig 439375.7.peg.4962  | fig 204722.5.peg.2509  |
|                                               |                                     | 4-hydroxybenzoate polyprenyltransferase (EC 2.5.1.-)                    | fig 439375.7.peg.3269, |                        |
|                                               |                                     | Ubiquinone biosynthesis monooxygenase UbiB                              | fig 439375.7.peg.4963  | fig 204722.5.peg.2510  |
|                                               |                                     | Ubiquinone/menaquinone biosynthesis methyltransferase UbiE (EC 2.1.1.-) | fig 439375.7.peg.567   | fig 204722.5.peg.431   |
| Riboflavin, FMN, FAD                          | riboflavin to FAD                   | 3,4-dihydroxy-2-butanone 4-phosphate synthase                           | fig 439375.7.peg.1378  | fig 204722.5.peg.3289  |
|                                               |                                     | FMN adenylyltransferase (EC 2.7.7.2)                                    | fig 439375.7.peg.1377  | fig 204722.5.peg.3290  |
|                                               |                                     | Riboflavin kinase (EC 2.7.1.26)                                         | fig 439375.7.peg.577   | fig 204722.5.peg.444   |
|                                               |                                     | Riboflavin synthase alpha chain (EC 2.5.1.9)                            | fig 439375.7.peg.3181  | fig 204722.5.peg.2415  |
|                                               | Riboflavin, FMN and FAD metabolism  | 3,4-dihydroxy-2-butanone 4-phosphate synthase                           | fig 439375.7.peg.3181  | fig 204722.5.peg.2415  |
|                                               |                                     | 5-amino-6-(5-phosphoribosylamino)uracil reductase (EC 1.1.1.193)        | fig 439375.7.peg.2661  | fig 204722.5.peg.779   |
|                                               |                                     |                                                                         | fig 439375.7.peg.577   | fig 204722.5.peg.444   |
|                                               |                                     | 6,7-dimethyl-8-ribityllumazine synthase (EC 2.5.1.9)                    | fig 439375.7.peg.2662  | fig 204722.5.peg.778   |
|                                               |                                     | Diaminohydroxyphosphoribosylaminopyrimidine deaminase (EC 3.5.4.26)     | fig 439375.7.peg.2660, | fig 204722.5.peg.780,  |
|                                               |                                     | FMN adenylyltransferase (EC 2.7.7.2)                                    | fig 439375.7.peg.3985  | fig 204722.5.peg.2906  |
|                                               |                                     | GTP cyclohydrolase II (EC 3.5.4.25)                                     | fig 439375.7.peg.577   | fig 204722.5.peg.444   |
|                                               |                                     | Riboflavin kinase (EC 2.7.1.26)                                         | fig 439375.7.peg.3181  | fig 204722.5.peg.2415  |
| Cobalamin synthesis                           |                                     | Riboflavin synthase alpha chain (EC 2.5.1.9)                            | fig 439375.7.peg.2661  | fig 204722.5.peg.779   |
|                                               |                                     | Adenosylcobinamide-phosphate guanylyltransferase (EC 2.7.7.62)          | fig 439375.7.peg.1975  | fig 204722.5.peg.1330  |
|                                               |                                     | Adenosylcobinamide-phosphate synthase                                   | fig 439375.7.peg.1991  | fig 204722.5.peg.1316  |
|                                               |                                     | Cob(I)alamin adenosyltransferase (EC 2.5.1.17)                          | fig 439375.7.peg.1978  | fig 204722.5.peg.1327  |
|                                               |                                     | Cobalamin biosynthesis protein BluB                                     | fig 439375.7.peg.1388  | fig 204722.5.peg.3279  |
|                                               |                                     | Cobalamin biosynthesis protein CbiG                                     |                        | fig 204722.5.peg.1311, |
|                                               |                                     | Cobalamin synthase                                                      | fig 439375.7.peg.1996  | fig 204722.5.peg.1323  |
|                                               |                                     | Cobalt-precorrin-2 C20-methyltransferase (EC 2.1.1.130)                 | fig 439375.7.peg.2491  | fig 204722.5.peg.877   |
|                                               |                                     | Cobalt-precorrin-3b C17-methyltransferase                               | fig 439375.7.peg.1997  | fig 204722.5.peg.1310  |
|                                               |                                     | Cobalt-precorrin-4 C11-methyltransferase (EC 2.1.1.133)                 | fig 439375.7.peg.1996  | fig 204722.5.peg.1311  |
|                                               |                                     | Cobalt-precorrin-6 synthase, anaerobic                                  | fig 439375.7.peg.1985  | fig 204722.5.peg.1322  |
|                                               |                                     | Cobalt-precorrin-6x reductase (EC 1.3.1.54)                             | fig 439375.7.peg.1987  | fig 204722.5.peg.1320  |
| Cobalt-precorrin-8x methylmutase (EC 5.4.1.2) | fig 439375.7.peg.1986               | fig 204722.5.peg.1321                                                   |                        |                        |
|                                               | fig 439375.7.peg.1998               | fig 204722.5.peg.1309                                                   |                        |                        |

Tetrapyrroles

Coenzyme B12 biosynthesis

|                                                                                      |                        |                        |
|--------------------------------------------------------------------------------------|------------------------|------------------------|
| Cobyric acid synthase                                                                | fig 439375.7.peg.1972  | fig 204722.5.peg.1333  |
| Cobyric acid A,C-diamide synthase                                                    | fig 439375.7.peg.1989  | fig 204722.5.peg.1318  |
| L-threonine 3-O-phosphate decarboxylase (EC 4.1.1.81)                                | fig 439375.7.peg.1990  | fig 204722.5.peg.1317  |
| Nicotinate-nucleotide--dimethylbenzimidazole phosphoribosyltransferase (EC 2.4.2.21) | fig 439375.7.peg.2490  | fig 204722.5.peg.878   |
| Threonine kinase in B12 biosynthesis                                                 | fig 439375.7.peg.691   |                        |
| 5,6-dimethylbenzimidazole synthase, flavin destructase family                        | fig 439375.7.peg.1388  | fig 204722.5.peg.3279  |
| Adenosylcobinamide amidohydrolase (EC 3.5.1.90)                                      | fig 439375.7.peg.4628  |                        |
| Adenosylcobinamide-phosphate guanylyltransferase (EC 2.7.7.62)                       | fig 439375.7.peg.1975  | fig 204722.5.peg.1330  |
| Adenosylcobinamide-phosphate synthase                                                | fig 439375.7.peg.1991  | fig 204722.5.peg.1316  |
| Aerobic cobaltochelataase CobS subunit (EC 6.6.1.2)                                  | fig 439375.7.peg.958   | fig 204722.5.peg.2057  |
| Aerobic cobaltochelataase CobT subunit (EC 6.6.1.2)                                  | fig 439375.7.peg.959   | fig 204722.5.peg.2056  |
| CblX, a non-orthologous displasment for Alpha-ribazole-5&#39;-phosphate phosphatase  | fig 439375.7.peg.2492  | fig 204722.5.peg.876   |
| CblY, a non-orthologous displasment for Alpha-ribazole-5&#39;-phosphate phosphatase  | fig 439375.7.peg.2493  | fig 204722.5.peg.875   |
| Cob(I)alamin adenosyltransferase (EC 2.5.1.17)                                       | fig 439375.7.peg.1978  | fig 204722.5.peg.1327  |
| Cob(I)alamin adenosyltransferase PduO (EC 2.5.1.17)                                  | fig 439375.7.peg.1056  | fig 204722.5.peg.2012  |
|                                                                                      |                        | fig 204722.5.peg.1311, |
| Cobalamin biosynthesis protein CbiG                                                  | fig 439375.7.peg.1996  | fig 204722.5.peg.1323  |
| Cobalamin biosynthesis protein CobG                                                  | fig 439375.7.peg.1999  | fig 204722.5.peg.1308  |
| Cobalamin synthase                                                                   | fig 439375.7.peg.2491  | fig 204722.5.peg.877   |
| Cobalt-precorrin-2 C20-methyltransferase (EC 2.1.1.130)                              | fig 439375.7.peg.1997  | fig 204722.5.peg.1310  |
| Cobalt-precorrin-3b C17-methyltransferase                                            | fig 439375.7.peg.1996  | fig 204722.5.peg.1311  |
| Cobalt-precorrin-4 C11-methyltransferase (EC 2.1.1.133)                              | fig 439375.7.peg.1985  | fig 204722.5.peg.1322  |
| Cobalt-precorrin-6 synthase, anaerobic                                               | fig 439375.7.peg.1987  | fig 204722.5.peg.1320  |
| Cobalt-precorrin-6x reductase (EC 1.3.1.54)                                          | fig 439375.7.peg.1986  | fig 204722.5.peg.1321  |
| Cobalt-precorrin-6y C15-methyltransferase [decarboxylating] (EC 2.1.1.-)             | fig 439375.7.peg.2000  | fig 204722.5.peg.1307  |
| Cobalt-precorrin-6y C5-methyltransferase (EC 2.1.1.-)                                | fig 439375.7.peg.2000  | fig 204722.5.peg.1307  |
| Cobalt-precorrin-8x methylmutase (EC 5.4.1.2)                                        | fig 439375.7.peg.1998  | fig 204722.5.peg.1309  |
| CobN component of cobalt chelataase involved in B12 biosynthesis                     | fig 439375.7.peg.1977  | fig 204722.5.peg.1328  |
| CobW GTPase involved in cobalt insertion for B12 biosynthesis                        | fig 439375.7.peg.1976  | fig 204722.5.peg.1329  |
| Cobyric acid synthase                                                                | fig 439375.7.peg.1972  | fig 204722.5.peg.1333  |
| Cobyric acid A,C-diamide synthase                                                    | fig 439375.7.peg.1989  | fig 204722.5.peg.1318  |
| L-threonine 3-O-phosphate decarboxylase (EC 4.1.1.81)                                | fig 439375.7.peg.1990  | fig 204722.5.peg.1317  |
| Nicotinate-nucleotide--dimethylbenzimidazole phosphoribosyltransferase (EC 2.4.2.21) | fig 439375.7.peg.2490  | fig 204722.5.peg.878   |
| Outer membrane vitamin B12 receptor BtuB                                             | fig 439375.7.peg.1927  | fig 204722.5.peg.1371  |
| Predicted cobalt transporter CbtA                                                    | fig 439375.7.peg.1974  | fig 204722.5.peg.1331  |
| Threonine kinase in B12 biosynthesis                                                 | fig 439375.7.peg.691   |                        |
|                                                                                      | fig 439375.7.peg.199,  | fig 204722.5.peg.188,  |
| Uroporphyrinogen-III methyltransferase (EC 2.1.1.107)                                | fig 439375.7.peg.1988  | fig 204722.5.peg.1319  |
|                                                                                      | fig 439375.7.peg.1930, |                        |
| Vitamin B12 ABC transporter, ATPase component BtuD                                   | fig 439375.7.peg.2966  | fig 204722.5.peg.1368  |

|                                               |                                       |                                                                                                                                         |                                                |                                                 |
|-----------------------------------------------|---------------------------------------|-----------------------------------------------------------------------------------------------------------------------------------------|------------------------------------------------|-------------------------------------------------|
|                                               |                                       | Vitamin B12 ABC transporter, B12-binding component BtuF                                                                                 | fig 439375.7.peg.1928                          | fig 204722.5.peg.1370                           |
|                                               |                                       | Vitamin B12 ABC transporter, permease component BtuC                                                                                    | fig 439375.7.peg.1929                          | fig 204722.5.peg.1369                           |
|                                               | Heme and Siroheme Biosynthesis        | 5-aminolevulinic synthase (EC 2.3.1.37)                                                                                                 | fig 439375.7.peg.438                           | fig 204722.5.peg.332                            |
|                                               |                                       | Coproporphyrinogen III oxidase, aerobic (EC 1.3.3.3)                                                                                    | fig 439375.7.peg.1703                          | fig 204722.5.peg.1577                           |
|                                               |                                       | Coproporphyrinogen III oxidase, oxygen-independent (EC 1.3.99.22)                                                                       | fig 439375.7.peg.2775                          | fig 204722.5.peg.668,<br>fig 204722.5.peg.3430  |
|                                               |                                       | Ferrochelatase, protoheme ferro-lyase (EC 4.99.1.1)                                                                                     | fig 439375.7.peg.4439                          | fig 204722.5.peg.2296                           |
|                                               |                                       | Glutamate-1-semialdehyde aminotransferase (EC 5.4.3.8)                                                                                  |                                                | fig 204722.5.peg.2650,<br>fig 204722.5.peg.3335 |
|                                               |                                       | Glutamyl-tRNA synthetase (EC 6.1.1.17)                                                                                                  | fig 439375.7.peg.2148                          | fig 204722.5.peg.1167                           |
|                                               |                                       | Porphobilinogen deaminase (EC 2.5.1.61)                                                                                                 | fig 439375.7.peg.1021                          | fig 204722.5.peg.1920                           |
|                                               |                                       | Porphobilinogen synthase (EC 4.2.1.24)                                                                                                  | fig 439375.7.peg.2670                          | fig 204722.5.peg.770                            |
|                                               |                                       | Precorrin-2 oxidase (EC 1.3.1.76)                                                                                                       | fig 439375.7.peg.199                           | fig 204722.5.peg.188                            |
|                                               |                                       | Radical SAM family enzyme, similar to coproporphyrinogen III oxidase, oxygen-independent, clustered with nucleoside-triphosphatase RdgB | fig 439375.7.peg.196                           | fig 204722.5.peg.184                            |
|                                               |                                       | Sirohydrochlorin ferrochelatase (EC 4.99.1.4)                                                                                           | fig 439375.7.peg.199                           | fig 204722.5.peg.188                            |
|                                               |                                       | Uroporphyrinogen III decarboxylase (EC 4.1.1.37)                                                                                        | fig 439375.7.peg.899                           | fig 204722.5.peg.2100                           |
|                                               |                                       | Uroporphyrinogen-III methyltransferase (EC 2.1.1.107)                                                                                   | fig 439375.7.peg.199,<br>fig 439375.7.peg.1988 | fig 204722.5.peg.188,<br>fig 204722.5.peg.1319  |
|                                               |                                       | Uroporphyrinogen-III synthase (EC 4.2.1.75)                                                                                             | fig 439375.7.peg.1022                          | fig 204722.5.peg.1919                           |
| DNA Metabolism                                |                                       | DNA structural proteins, bacterial                                                                                                      | DNA-binding protein HU                         | fig 439375.7.peg.4842                           |
|                                               | DNA-binding protein HU-beta           |                                                                                                                                         | fig 439375.7.peg.2315                          | fig 204722.5.peg.1126                           |
|                                               | Integration host factor alpha subunit |                                                                                                                                         | fig 439375.7.peg.2651                          | fig 204722.5.peg.788                            |
|                                               | Integration host factor beta subunit  |                                                                                                                                         | fig 439375.7.peg.175                           | fig 204722.5.peg.159                            |
|                                               | Restriction-Modification System       | Putative predicted metal-dependent hydrolase                                                                                            |                                                | fig 204722.5.peg.3059                           |
|                                               |                                       | Type I restriction-modification system, DNA-methyltransferase subunit M (EC 2.1.1.72)                                                   |                                                | fig 204722.5.peg.3056                           |
|                                               |                                       | Type I restriction-modification system, restriction subunit R (EC 3.1.21.3)                                                             |                                                | fig 204722.5.peg.3058                           |
|                                               |                                       | Type I restriction-modification system, specificity subunit S (EC 3.1.21.3)                                                             |                                                | fig 204722.5.peg.3057                           |
|                                               | Type I Restriction-Modification       | Type I restriction-modification system, DNA-methyltransferase subunit M (EC 2.1.1.72)                                                   |                                                | fig 204722.5.peg.3056                           |
|                                               |                                       | Type I restriction-modification system, restriction subunit R (EC 3.1.21.3)                                                             |                                                | fig 204722.5.peg.3058                           |
|                                               |                                       | Type I restriction-modification system, specificity subunit S (EC 3.1.21.3)                                                             |                                                | fig 204722.5.peg.3057                           |
|                                               | 2-phosphoglycolate salvage            | Phosphoglycolate phosphatase (EC 3.1.3.18)                                                                                              | fig 439375.7.peg.2197                          | fig 204722.5.peg.1019                           |
|                                               |                                       | Putative phosphatase YfbT                                                                                                               | fig 439375.7.peg.2495                          | fig 204722.5.peg.872                            |
|                                               |                                       | Similar to phosphoglycolate phosphatase, clustered with ribosomal large subunit pseudouridine synthase C                                | fig 439375.7.peg.2191                          | fig 204722.5.peg.1013                           |
|                                               | DNA Repair Base Excision              | ATP-dependent DNA ligase (EC 6.5.1.1) clustered with Ku protein, LigD                                                                   | fig 439375.7.peg.4495                          |                                                 |
| ATP-dependent DNA ligase (EC 6.5.1.1) LigC    |                                       | fig 439375.7.peg.4219                                                                                                                   |                                                |                                                 |
| DNA ligase (EC 6.5.1.2)                       |                                       | fig 439375.7.peg.1855                                                                                                                   | fig 204722.5.peg.1446                          |                                                 |
| DNA polymerase I (EC 2.7.7.7)                 |                                       | fig 439375.7.peg.146                                                                                                                    | fig 204722.5.peg.127                           |                                                 |
| DNA-3-methyladenine glycosylase (EC 3.2.2.20) |                                       | fig 439375.7.peg.3167                                                                                                                   | fig 204722.5.peg.2401                          |                                                 |
| Endonuclease III (EC 4.2.99.18)               |                                       | fig 439375.7.peg.187                                                                                                                    | fig 204722.5.peg.173                           |                                                 |

DNA Metabolism

DNA repair

|                                       |                                                                       |                                                                           |                                                                         |                       |
|---------------------------------------|-----------------------------------------------------------------------|---------------------------------------------------------------------------|-------------------------------------------------------------------------|-----------------------|
|                                       | Formamidopyrimidine-DNA glycosylase (EC 3.2.2.23)                     | fig 439375.7.peg.754                                                      | fig 204722.5.peg.2220                                                   |                       |
|                                       | Ku domain protein                                                     | fig 439375.7.peg.4494,<br>fig 439375.7.peg.4496                           |                                                                         |                       |
|                                       | Single-stranded-DNA-specific exonuclease RecJ (EC 3.1.--)             | fig 439375.7.peg.2021                                                     | fig 204722.5.peg.1289                                                   |                       |
| DNA repair, bacterial                 | A/G-specific adenine glycosylase (EC 3.2.2.-)                         | fig 439375.7.peg.647                                                      | fig 204722.5.peg.508                                                    |                       |
|                                       | ADA regulatory protein                                                | fig 439375.7.peg.508,<br>fig 439375.7.peg.3442                            | fig 204722.5.peg.385,<br>fig 204722.5.peg.3108                          |                       |
|                                       | Alkylated DNA repair protein AlkB                                     | fig 439375.7.peg.3734                                                     | fig 204722.5.peg.2748                                                   |                       |
|                                       | DNA polymerase IV (EC 2.7.7.7)                                        | fig 439375.7.peg.2404,<br>fig 439375.7.peg.3845                           | fig 204722.5.peg.2831                                                   |                       |
|                                       | DNA polymerase-like protein PA0670                                    | fig 439375.7.peg.82,<br>fig 439375.7.peg.3296                             | fig 204722.5.peg.73                                                     |                       |
|                                       | DNA recombination protein RmuC                                        | fig 439375.7.peg.1408                                                     | fig 204722.5.peg.3261                                                   |                       |
|                                       | DNA repair protein RadA                                               | fig 439375.7.peg.601                                                      | fig 204722.5.peg.464                                                    |                       |
|                                       | DNA repair protein RadC                                               | fig 439375.7.peg.2009                                                     | fig 204722.5.peg.1305                                                   |                       |
|                                       | DNA repair protein RecN                                               | fig 439375.7.peg.1854                                                     | fig 204722.5.peg.1447                                                   |                       |
|                                       | DNA-cytosine methyltransferase (EC 2.1.1.37)                          | fig 439375.7.peg.1583                                                     |                                                                         |                       |
|                                       | DNA-damage-inducible protein J                                        |                                                                           | fig 204722.5.peg.2592                                                   |                       |
|                                       | Exodeoxyribonuclease III (EC 3.1.11.2)                                | fig 439375.7.peg.1008,<br>fig 439375.7.peg.2485                           | fig 204722.5.peg.884,<br>fig 204722.5.peg.2040                          |                       |
|                                       | Exodeoxyribonuclease VII large subunit (EC 3.1.11.6)                  | fig 439375.7.peg.3147                                                     | fig 204722.5.peg.2976                                                   |                       |
|                                       | Exodeoxyribonuclease VII small subunit (EC 3.1.11.6)                  | fig 439375.7.peg.579                                                      | fig 204722.5.peg.446                                                    |                       |
|                                       | Methylated-DNA--protein-cysteine methyltransferase (EC 2.1.1.63)      | fig 439375.7.peg.205,<br>fig 439375.7.peg.508,<br>fig 439375.7.peg.3442   | fig 204722.5.peg.194,<br>fig 204722.5.peg.385,<br>fig 204722.5.peg.3108 |                       |
|                                       | RecA protein                                                          | fig 439375.7.peg.2088,<br>fig 439375.7.peg.1612,                          | fig 204722.5.peg.1223                                                   |                       |
|                                       | Single-stranded DNA-binding protein                                   | fig 439375.7.peg.2309                                                     | fig 204722.5.peg.1123                                                   |                       |
|                                       | SOS-response repressor and protease LexA (EC 3.4.21.88)               | fig 439375.7.peg.2150                                                     | fig 204722.5.peg.1164                                                   |                       |
|                                       | DNA repair, bacterial MutL-MutS system                                | DNA mismatch repair protein MutL                                          | fig 439375.7.peg.3200                                                   | fig 204722.5.peg.2435 |
|                                       |                                                                       | DNA mismatch repair protein MutS                                          | fig 439375.7.peg.169                                                    | fig 204722.5.peg.153  |
| DNA repair, bacterial photolyase      | Deoxyribodipyrimidine photolyase (EC 4.1.99.3)                        | fig 439375.7.peg.361                                                      |                                                                         |                       |
| DNA repair, bacterial RecFOR pathway  | DNA recombination and repair protein RecF                             | fig 439375.7.peg.5                                                        | fig 204722.5.peg.4                                                      |                       |
|                                       | DNA recombination and repair protein RecO                             | fig 439375.7.peg.2767                                                     | fig 204722.5.peg.676                                                    |                       |
|                                       | RecA protein                                                          | fig 439375.7.peg.2088                                                     | fig 204722.5.peg.1223                                                   |                       |
|                                       | Recombination protein RecR                                            | fig 439375.7.peg.24                                                       | fig 204722.5.peg.36                                                     |                       |
|                                       | Single-stranded DNA-binding protein                                   | fig 439375.7.peg.1612,<br>fig 439375.7.peg.2309                           | fig 204722.5.peg.1123                                                   |                       |
| DNA repair, UvrABC system             | Single-stranded-DNA-specific exonuclease RecJ (EC 3.1.--)             | fig 439375.7.peg.2021                                                     | fig 204722.5.peg.1289                                                   |                       |
|                                       | Excinuclease ABC subunit A                                            | fig 439375.7.peg.2311                                                     | fig 204722.5.peg.1125                                                   |                       |
|                                       | Excinuclease ABC subunit B                                            | fig 439375.7.peg.1741                                                     | fig 204722.5.peg.1537                                                   |                       |
|                                       | Excinuclease ABC subunit C                                            | fig 439375.7.peg.2728                                                     | fig 204722.5.peg.711                                                    |                       |
| Nonhomologous End-Joining in Bacteria | ATP-dependent DNA ligase (EC 6.5.1.1) clustered with Ku protein, LigD | fig 439375.7.peg.4495                                                     |                                                                         |                       |
|                                       | ATP-dependent DNA ligase (EC 6.5.1.1) LigC                            | fig 439375.7.peg.4219,<br>fig 439375.7.peg.4494,<br>fig 439375.7.peg.4496 |                                                                         |                       |
|                                       | Ku domain protein                                                     | fig 439375.7.peg.4496                                                     |                                                                         |                       |
| Uracil-DNA glycosylase                | Uracil-DNA glycosylase, family 4                                      | fig 439375.7.peg.2804                                                     | fig 204722.5.peg.638                                                    |                       |
|                                       | Uracil-DNA glycosylase, family 5                                      | fig 439375.7.peg.2781                                                     | fig 204722.5.peg.662                                                    |                       |

**DNA replication**

|                                                            |                                                                   |                        |                       |
|------------------------------------------------------------|-------------------------------------------------------------------|------------------------|-----------------------|
| DNA topoisomerases, Type II, ATP-dependent                 | DNA gyrase subunit A (EC 5.99.1.3)                                | fig 439375.7.peg.2292  | fig 204722.5.peg.1118 |
|                                                            | DNA gyrase subunit B (EC 5.99.1.3)                                | fig 439375.7.peg.148   | fig 204722.5.peg.129  |
|                                                            | Topoisomerase IV subunit A (EC 5.99.1.-)                          | fig 439375.7.peg.2673  | fig 204722.5.peg.767  |
|                                                            | Topoisomerase IV subunit B (EC 5.99.1.-)                          | fig 439375.7.peg.3819  | fig 204722.5.peg.2807 |
| DNA-replication                                            | ATP-dependent DNA helicase RecG (EC 3.6.1.-)                      | fig 439375.7.peg.3803  | fig 204722.5.peg.2797 |
|                                                            |                                                                   | fig 439375.7.peg.3,    | fig 204722.5.peg.2,   |
|                                                            |                                                                   | fig 439375.7.peg.2711, | fig 204722.5.peg.588, |
|                                                            | Chromosomal replication initiator protein DnaA                    | fig 439375.7.peg.2834  | fig 204722.5.peg.726  |
|                                                            | Crossover junction endodeoxyribonuclease RuvC (EC 3.1.22.4)       | fig 439375.7.peg.1266  | fig 204722.5.peg.1731 |
|                                                            | DNA polymerase I (EC 2.7.7.7)                                     | fig 439375.7.peg.146   | fig 204722.5.peg.127  |
|                                                            |                                                                   | fig 439375.7.peg.81,   |                       |
|                                                            |                                                                   | fig 439375.7.peg.2532, | fig 204722.5.peg.72,  |
|                                                            | DNA polymerase III alpha subunit (EC 2.7.7.7)                     | fig 439375.7.peg.3297  | fig 204722.5.peg.836  |
|                                                            | DNA polymerase III beta subunit (EC 2.7.7.7)                      | fig 439375.7.peg.4     | fig 204722.5.peg.3    |
|                                                            | DNA polymerase III chi subunit (EC 2.7.7.7)                       | fig 439375.7.peg.2740  | fig 204722.5.peg.702  |
|                                                            | DNA polymerase III delta prime subunit (EC 2.7.7.7)               | fig 439375.7.peg.2184  | fig 204722.5.peg.1005 |
|                                                            | DNA polymerase III delta subunit (EC 2.7.7.7)                     | fig 439375.7.peg.908   | fig 204722.5.peg.2091 |
|                                                            | DNA polymerase III epsilon subunit (EC 2.7.7.7)                   | fig 439375.7.peg.894   | fig 204722.5.peg.2106 |
|                                                            | DNA polymerase III subunits gamma and tau (EC 2.7.7.7)            | fig 439375.7.peg.22    | fig 204722.5.peg.38   |
|                                                            | DNA primase (EC 2.7.7.-)                                          | fig 439375.7.peg.1778  | fig 204722.5.peg.1507 |
|                                                            | DNA repair protein RecN                                           | fig 439375.7.peg.1854  | fig 204722.5.peg.1447 |
|                                                            | Helicase PriA essential for oriC/DnaA-independent DNA replication | fig 439375.7.peg.1150  | fig 204722.5.peg.1832 |
|                                                            | Holliday junction DNA helicase RuvA                               | fig 439375.7.peg.1267  | fig 204722.5.peg.1730 |
|                                                            | Holliday junction DNA helicase RuvB                               | fig 439375.7.peg.1268  | fig 204722.5.peg.1729 |
|                                                            | RecA protein                                                      | fig 439375.7.peg.2088  | fig 204722.5.peg.1223 |
|                                                            | Recombination protein RecR                                        | fig 439375.7.peg.24    | fig 204722.5.peg.36   |
|                                                            |                                                                   | fig 439375.7.peg.247,  |                       |
|                                                            | fig 439375.7.peg.602,                                             |                        |                       |
| Replicative DNA helicase (EC 3.6.1.-)                      | fig 439375.7.peg.824                                              | fig 204722.5.peg.465   |                       |
| Single-stranded-DNA-specific exonuclease RecJ (EC 3.1.-.-) | fig 439375.7.peg.2021                                             | fig 204722.5.peg.1289  |                       |
| Transcription-repair coupling factor                       | fig 439375.7.peg.3801                                             | fig 204722.5.peg.2795  |                       |
| Plasmid replication                                        |                                                                   | fig 439375.7.peg.906,  |                       |
|                                                            | Chromosome (plasmid) partitioning protein ParA                    | fig 439375.7.peg.3337  | fig 204722.5.peg.2093 |
|                                                            | Chromosome (plasmid) partitioning protein ParB                    | fig 439375.7.peg.907   | fig 204722.5.peg.2092 |
|                                                            |                                                                   | fig 439375.7.peg.4633, |                       |
|                                                            |                                                                   | fig 439375.7.peg.4704, |                       |
|                                                            |                                                                   | fig 439375.7.peg.4901, |                       |
|                                                            |                                                                   | fig 439375.7.peg.4934, |                       |
| Plasmid replication protein RepA                           | fig 439375.7.peg.4972                                             | fig 204722.5.peg.3433  |                       |
|                                                            | fig 439375.7.peg.4632,                                            |                        |                       |
|                                                            | fig 439375.7.peg.4705,                                            |                        |                       |
|                                                            | fig 439375.7.peg.4902,                                            |                        |                       |
|                                                            | fig 439375.7.peg.4935,                                            |                        |                       |
| Plasmid replication protein RepB                           | fig 439375.7.peg.4971                                             | fig 204722.5.peg.3434  |                       |

|  |                          |                                                                       |                                                                                                                                                                                                                                                                                                                  |                                                                                                                                                       |
|--|--------------------------|-----------------------------------------------------------------------|------------------------------------------------------------------------------------------------------------------------------------------------------------------------------------------------------------------------------------------------------------------------------------------------------------------|-------------------------------------------------------------------------------------------------------------------------------------------------------|
|  |                          |                                                                       | fig 439375.7.peg.4631,<br>fig 439375.7.peg.4706,<br>fig 439375.7.peg.4809,<br>fig 439375.7.peg.4936,<br>fig 439375.7.peg.4970                                                                                                                                                                                    | fig 204722.5.peg.2223                                                                                                                                 |
|  |                          | Plasmid replication protein RepC                                      |                                                                                                                                                                                                                                                                                                                  |                                                                                                                                                       |
|  | Acyl-CoA thioesterase II | Acyl-CoA thioesterase II (EC 3.1.2.-)                                 | fig 439375.7.peg.1003                                                                                                                                                                                                                                                                                            | fig 204722.5.peg.1931                                                                                                                                 |
|  |                          | (3R)-hydroxymyristoyl-[acyl carrier protein] dehydratase (EC 4.2.1.-) | fig 439375.7.peg.2143                                                                                                                                                                                                                                                                                            | fig 204722.5.peg.1172                                                                                                                                 |
|  |                          | 3-hydroxydecanoyl-[acyl-carrier-protein] dehydratase (EC 4.2.1.60)    | fig 439375.7.peg.780                                                                                                                                                                                                                                                                                             | fig 204722.5.peg.2210                                                                                                                                 |
|  |                          |                                                                       | fig 439375.7.peg.610,<br>fig 439375.7.peg.922,<br>fig 439375.7.peg.925,<br>fig 439375.7.peg.1189,<br>fig 439375.7.peg.1235,<br>fig 439375.7.peg.2206,<br>fig 439375.7.peg.2341,<br>fig 439375.7.peg.2646,<br>fig 439375.7.peg.3083,<br>fig 439375.7.peg.3513,<br>fig 439375.7.peg.4128,<br>fig 439375.7.peg.4758 | fig 204722.5.peg.473,<br>fig 204722.5.peg.729,<br>fig 204722.5.peg.2073,<br>fig 204722.5.peg.2077,<br>fig 204722.5.peg.2252,<br>fig 204722.5.peg.2990 |
|  |                          | 3-oxoacyl-[acyl-carrier protein] reductase (EC 1.1.1.100)             | fig 439375.7.peg.4758                                                                                                                                                                                                                                                                                            | fig 204722.5.peg.2990                                                                                                                                 |
|  |                          | 3-oxoacyl-[acyl-carrier-protein] synthase, KASI (EC 2.3.1.41)         | fig 439375.7.peg.781                                                                                                                                                                                                                                                                                             | fig 204722.5.peg.2209                                                                                                                                 |
|  |                          |                                                                       | fig 439375.7.peg.612,<br>fig 439375.7.peg.2503                                                                                                                                                                                                                                                                   | fig 204722.5.peg.476,<br>fig 204722.5.peg.863                                                                                                         |
|  |                          | 3-oxoacyl-[acyl-carrier-protein] synthase, KASII (EC 2.3.1.41)        |                                                                                                                                                                                                                                                                                                                  |                                                                                                                                                       |
|  |                          | 3-oxoacyl-[acyl-carrier-protein] synthase, KASIII (EC 2.3.1.41)       | fig 439375.7.peg.2652                                                                                                                                                                                                                                                                                            | fig 204722.5.peg.787                                                                                                                                  |
|  |                          | Acetyl-coenzyme A carboxyl transferase alpha chain (EC 6.4.1.2)       | fig 439375.7.peg.948                                                                                                                                                                                                                                                                                             | fig 204722.5.peg.2067                                                                                                                                 |
|  |                          | Acetyl-coenzyme A carboxyl transferase beta chain (EC 6.4.1.2)        | fig 439375.7.peg.858                                                                                                                                                                                                                                                                                             | fig 204722.5.peg.2144                                                                                                                                 |
|  |                          |                                                                       | fig 439375.7.peg.242,<br>fig 439375.7.peg.611,<br>fig 439375.7.peg.1548,<br>fig 439375.7.peg.2501                                                                                                                                                                                                                | fig 204722.5.peg.474,<br>fig 204722.5.peg.865                                                                                                         |
|  |                          | Acyl carrier protein                                                  |                                                                                                                                                                                                                                                                                                                  |                                                                                                                                                       |
|  |                          | Biotin carboxyl carrier protein of acetyl-CoA carboxylase             | fig 439375.7.peg.2393                                                                                                                                                                                                                                                                                            | fig 204722.5.peg.921                                                                                                                                  |
|  |                          | Biotin carboxylase of acetyl-CoA carboxylase (EC 6.3.4.14)            | fig 439375.7.peg.2394                                                                                                                                                                                                                                                                                            | fig 204722.5.peg.919                                                                                                                                  |
|  |                          |                                                                       | fig 439375.7.peg.572,<br>fig 439375.7.peg.782                                                                                                                                                                                                                                                                    | fig 204722.5.peg.435,<br>fig 204722.5.peg.2208                                                                                                        |
|  |                          | Enoyl-[acyl-carrier-protein] reductase [NADH] (EC 1.3.1.9)            |                                                                                                                                                                                                                                                                                                                  |                                                                                                                                                       |
|  |                          | Enoyl-[acyl-carrier-protein] reductase [NADPH] (EC 1.3.1.10)          | fig 439375.7.peg.3607                                                                                                                                                                                                                                                                                            |                                                                                                                                                       |
|  |                          | Holo-[acyl-carrier protein] synthase (EC 2.7.8.7)                     | fig 439375.7.peg.2771                                                                                                                                                                                                                                                                                            | fig 204722.5.peg.672                                                                                                                                  |
|  |                          | Holo-[acyl-carrier protein] synthase, alternative (EC 2.7.8.7)        |                                                                                                                                                                                                                                                                                                                  | fig 204722.5.peg.2234                                                                                                                                 |
|  |                          | Malonyl CoA-acyl carrier protein transacylase (EC 2.3.1.39)           | fig 439375.7.peg.609                                                                                                                                                                                                                                                                                             | fig 204722.5.peg.472                                                                                                                                  |
|  |                          |                                                                       | fig 439375.7.peg.3071,<br>fig 439375.7.peg.4195,<br>fig 439375.7.peg.4206,<br>fig 439375.7.peg.4885                                                                                                                                                                                                              | fig 204722.5.peg.2440,<br>fig 204722.5.peg.3008,<br>fig 204722.5.peg.3311                                                                             |
|  |                          | 3-hydroxyacyl-CoA dehydrogenase (EC 1.1.1.35)                         | fig 439375.7.peg.4885                                                                                                                                                                                                                                                                                            | fig 204722.5.peg.3311                                                                                                                                 |
|  |                          | 3-hydroxybutyryl-CoA dehydratase (EC 4.2.1.55)                        | fig 439375.7.peg.919                                                                                                                                                                                                                                                                                             | fig 204722.5.peg.2080                                                                                                                                 |

**Fatty acids**

Fatty Acid Biosynthesis FASII

Fatty Acids, Lipids, and Isoprenoids

|                                                                       |                                                                                                                               |                                                      |                                                                                                                               |                                                                           |
|-----------------------------------------------------------------------|-------------------------------------------------------------------------------------------------------------------------------|------------------------------------------------------|-------------------------------------------------------------------------------------------------------------------------------|---------------------------------------------------------------------------|
| Fatty Acids, Lipids, and Isoprenoids                                  | Polyhydroxybutyrate metabolism                                                                                                | 3-hydroxybutyryl-CoA dehydrogenase (EC 1.1.1.157)    | fig 439375.7.peg.1062,<br>fig 439375.7.peg.4885                                                                               | fig 204722.5.peg.2006,<br>fig 204722.5.peg.2440,<br>fig 204722.5.peg.3311 |
|                                                                       |                                                                                                                               | 3-hydroxybutyryl-CoA epimerase (EC 5.1.2.3)          | fig 439375.7.peg.4195,<br>fig 439375.7.peg.4206                                                                               | fig 204722.5.peg.3008                                                     |
|                                                                       |                                                                                                                               | 3-ketoacyl-CoA thiolase (EC 2.3.1.16)                | fig 439375.7.peg.4207                                                                                                         | fig 204722.5.peg.3009                                                     |
|                                                                       |                                                                                                                               | Acetoacetyl-CoA synthetase (EC 6.2.1.16)             | fig 439375.7.peg.37                                                                                                           | fig 204722.5.peg.24                                                       |
|                                                                       |                                                                                                                               | Acetyl-CoA acetyltransferase (EC 2.3.1.9)            | fig 439375.7.peg.1181,<br>fig 439375.7.peg.3257,<br>fig 439375.7.peg.3882,<br>fig 439375.7.peg.4196,<br>fig 439375.7.peg.4207 | fig 204722.5.peg.1799,<br>fig 204722.5.peg.2849,<br>fig 204722.5.peg.3009 |
|                                                                       |                                                                                                                               | D-beta-hydroxybutyrate dehydrogenase (EC 1.1.1.30)   | fig 439375.7.peg.1172,<br>fig 439375.7.peg.4191                                                                               | fig 204722.5.peg.1806                                                     |
|                                                                       |                                                                                                                               | D-beta-hydroxybutyrate permease                      | fig 439375.7.peg.2572                                                                                                         |                                                                           |
|                                                                       |                                                                                                                               | Enoyl-CoA hydratase (EC 4.2.1.17)                    | fig 439375.7.peg.564,<br>fig 439375.7.peg.4192,<br>fig 439375.7.peg.4195                                                      | fig 204722.5.peg.427                                                      |
|                                                                       |                                                                                                                               | 1-deoxy-D-xylulose 5-phosphate synthase (EC 2.2.1.7) | fig 439375.7.peg.584                                                                                                          | fig 204722.5.peg.451                                                      |
|                                                                       |                                                                                                                               | Isoprenoids                                          | Isoprenoid Biosynthesis                                                                                                       | 1-hydroxy-2-methyl-2-(E)-butenyl 4-diphosphate synthase (EC 1.17.7.1)     |
| 2-C-methyl-D-erythritol 2,4-cyclodiphosphate synthase (EC 4.6.1.12)   | fig 439375.7.peg.2175                                                                                                         |                                                      |                                                                                                                               | fig 204722.5.peg.1140                                                     |
| 2-C-methyl-D-erythritol 4-phosphate cytidyltransferase (EC 2.7.7.60)  | fig 439375.7.peg.2175                                                                                                         |                                                      |                                                                                                                               | fig 204722.5.peg.1140                                                     |
| 4-diphosphocytidyl-2-C-methyl-D-erythritol kinase (EC 2.7.1.148)      | fig 439375.7.peg.547                                                                                                          |                                                      |                                                                                                                               | fig 204722.5.peg.409                                                      |
| 4-hydroxy-3-methylbut-2-enyl diphosphate reductase (EC 1.17.1.2)      | fig 439375.7.peg.629                                                                                                          |                                                      |                                                                                                                               | fig 204722.5.peg.490                                                      |
| Acetyl-CoA acetyltransferase (EC 2.3.1.9)                             | fig 439375.7.peg.1181,<br>fig 439375.7.peg.3257,<br>fig 439375.7.peg.3882,<br>fig 439375.7.peg.4196,<br>fig 439375.7.peg.4207 |                                                      |                                                                                                                               | fig 204722.5.peg.1799,<br>fig 204722.5.peg.2849,<br>fig 204722.5.peg.3009 |
| Dimethylallyltransferase (EC 2.5.1.1)                                 | fig 439375.7.peg.554,<br>fig 439375.7.peg.1176                                                                                |                                                      |                                                                                                                               | fig 204722.5.peg.416,<br>fig 204722.5.peg.1804                            |
| Geranyltranstransferase (farnesyl diphosphate synthase) (EC 2.5.1.10) | fig 439375.7.peg.1176                                                                                                         |                                                      |                                                                                                                               | fig 204722.5.peg.1804                                                     |
| Undecaprenyl pyrophosphate synthetase (EC 2.5.1.31)                   | fig 439375.7.peg.2138                                                                                                         |                                                      |                                                                                                                               | fig 204722.5.peg.1177                                                     |
| Polyprenyl Diphosphate Biosynthesis                                   | Geranylgeranyl pyrophosphate synthetase (EC 2.5.1.29)                                                                         |                                                      |                                                                                                                               | fig 439375.7.peg.554,<br>fig 439375.7.peg.1176                            |
|                                                                       | Geranyltranstransferase (farnesyl diphosphate synthase) (EC 2.5.1.10)                                                         |                                                      | fig 439375.7.peg.554,<br>fig 439375.7.peg.1176                                                                                | fig 204722.5.peg.416,<br>fig 204722.5.peg.1804                            |
|                                                                       | Octaprenyl-diphosphate synthase (EC 2.5.1.-)                                                                                  |                                                      | fig 439375.7.peg.1176                                                                                                         | fig 204722.5.peg.416,<br>fig 204722.5.peg.1804                            |
|                                                                       | Undecaprenyl pyrophosphate synthetase (EC 2.5.1.31)                                                                           |                                                      | fig 439375.7.peg.2138                                                                                                         | fig 204722.5.peg.1177                                                     |
|                                                                       | 1-acyl-sn-glycerol-3-phosphate acyltransferase (EC 2.3.1.51)                                                                  |                                                      | fig 439375.7.peg.802,<br>fig 439375.7.peg.1035,<br>fig 439375.7.peg.3032                                                      | fig 204722.5.peg.2032,<br>fig 204722.5.peg.2189                           |

|                                                                  |                                                             |                                                                                 |                                                                                                                              |                                                                                                                                                        |                       |                       |
|------------------------------------------------------------------|-------------------------------------------------------------|---------------------------------------------------------------------------------|------------------------------------------------------------------------------------------------------------------------------|--------------------------------------------------------------------------------------------------------------------------------------------------------|-----------------------|-----------------------|
| Phospholipids                                                    | Glycerolipid and Glycerophospholipid Metabolism in Bacteria | Acyl carrier protein                                                            | fig 439375.7.peg.242,<br>fig 439375.7.peg.611,<br>fig 439375.7.peg.1548,<br>fig 439375.7.peg.2501                            | fig 204722.5.peg.474,<br>fig 204722.5.peg.865                                                                                                          |                       |                       |
|                                                                  |                                                             | Acyl-phosphate:glycerol-3-phosphate O-acyltransferase PIsY                      | fig 439375.7.peg.3831                                                                                                        | fig 204722.5.peg.2818                                                                                                                                  |                       |                       |
|                                                                  |                                                             | Aerobic glycerol-3-phosphate dehydrogenase (EC 1.1.5.3)                         | fig 439375.7.peg.289                                                                                                         | fig 204722.5.peg.207                                                                                                                                   |                       |                       |
|                                                                  |                                                             | Alcohol dehydrogenase (EC 1.1.1.1)                                              | fig 439375.7.peg.292,<br>fig 439375.7.peg.2504,<br>fig 439375.7.peg.3765,<br>fig 439375.7.peg.4052,<br>fig 439375.7.peg.4825 | fig 204722.5.peg.210,<br>fig 204722.5.peg.862,<br>fig 204722.5.peg.1075,<br>fig 204722.5.peg.2614,<br>fig 204722.5.peg.2948                            |                       |                       |
|                                                                  |                                                             | Aldehyde dehydrogenase (EC 1.2.1.3)                                             | fig 439375.7.peg.291,<br>fig 439375.7.peg.1348,<br>fig 439375.7.peg.1385,<br>fig 439375.7.peg.2980,<br>fig 439375.7.peg.4960 | fig 204722.5.peg.209,<br>fig 204722.5.peg.1879,<br>fig 204722.5.peg.3239,<br>fig 204722.5.peg.3282,<br>fig 204722.5.peg.3385,<br>fig 204722.5.peg.3402 |                       |                       |
|                                                                  |                                                             | Aldehyde dehydrogenase B (EC 1.2.1.22)                                          | fig 439375.7.peg.297                                                                                                         | fig 204722.5.peg.216                                                                                                                                   |                       |                       |
|                                                                  |                                                             | Cardiolipin synthetase (EC 2.7.8.-)                                             | fig 439375.7.peg.1529                                                                                                        | fig 204722.5.peg.3126                                                                                                                                  |                       |                       |
|                                                                  |                                                             | CDP-diacylglycerol--glycerol-3-phosphate 3-phosphatidyltransferase (EC 2.7.8.5) | fig 439375.7.peg.1383                                                                                                        | fig 204722.5.peg.3284                                                                                                                                  |                       |                       |
|                                                                  |                                                             | CDP-diacylglycerol--serine O-phosphatidyltransferase (EC 2.7.8.8)               | fig 439375.7.peg.2729,<br>fig 439375.7.peg.3028                                                                              | fig 204722.5.peg.710                                                                                                                                   |                       |                       |
|                                                                  |                                                             | Diacylglycerol kinase (EC 2.7.1.107)                                            | fig 439375.7.peg.595                                                                                                         | fig 204722.5.peg.460                                                                                                                                   |                       |                       |
|                                                                  |                                                             | Glycerol kinase (EC 2.7.1.30)                                                   | fig 439375.7.peg.2202                                                                                                        | fig 204722.5.peg.1025                                                                                                                                  |                       |                       |
|                                                                  |                                                             | Glycerol-3-phosphate dehydrogenase (EC 1.1.5.3)                                 | fig 439375.7.peg.1135,<br>fig 439375.7.peg.2592                                                                              | fig 204722.5.peg.2660                                                                                                                                  |                       |                       |
|                                                                  |                                                             | Glycerol-3-phosphate dehydrogenase [NAD(P)+] (EC 1.1.1.94)                      | fig 439375.7.peg.2593,<br>fig 439375.7.peg.3066,<br>fig 439375.7.peg.3228                                                    |                                                                                                                                                        |                       |                       |
|                                                                  |                                                             | Phosphate:acyl-ACP acyltransferase PIsX                                         | fig 439375.7.peg.1019                                                                                                        | fig 204722.5.peg.1923                                                                                                                                  |                       |                       |
|                                                                  |                                                             | Phosphatidate cytidyltransferase (EC 2.7.7.41)                                  | fig 439375.7.peg.2653                                                                                                        | fig 204722.5.peg.786                                                                                                                                   |                       |                       |
|                                                                  |                                                             | Phosphatidylglycerophosphatase B (EC 3.1.3.27)                                  | fig 439375.7.peg.2139,<br>fig 439375.7.peg.3033                                                                              | fig 204722.5.peg.1176                                                                                                                                  |                       |                       |
|                                                                  |                                                             | Phosphatidylserine decarboxylase (EC 4.1.1.65)                                  | fig 439375.7.peg.2695                                                                                                        | fig 204722.5.peg.754,<br>fig 204722.5.peg.2352                                                                                                         |                       |                       |
|                                                                  |                                                             | Triacylglycerols                                                                | Triacylglycerol metabolism                                                                                                   | Lysophospholipase (EC 3.1.1.5)                                                                                                                         | fig 439375.7.peg.594  | fig 204722.5.peg.459  |
|                                                                  |                                                             |                                                                                 |                                                                                                                              | Lysophospholipase L2 (EC 3.1.1.5)                                                                                                                      | fig 439375.7.peg.1814 | fig 204722.5.peg.1485 |
|                                                                  |                                                             |                                                                                 |                                                                                                                              | Monoglyceride lipase (EC 3.1.1.23)                                                                                                                     | fig 439375.7.peg.4456 | fig 204722.5.peg.2268 |
| Putative lipase in cluster with Phosphatidate cytidyltransferase | fig 439375.7.peg.1814                                       |                                                                                 |                                                                                                                              | fig 204722.5.peg.1485                                                                                                                                  |                       |                       |
| Phosphonate ABC transporter ATP-binding protein (TC 3.A.1.9.1)   | fig 439375.7.peg.3029                                       |                                                                                 |                                                                                                                              |                                                                                                                                                        |                       |                       |
| ABC transporter alkylphosphonate                                 | ABC transporter alkylphosphonate                            | Phosphonate ABC transporter permease protein phnE1 (TC 3.A.1.9.1)               | fig 439375.7.peg.2297                                                                                                        |                                                                                                                                                        |                       |                       |
|                                                                  |                                                             | Phosphonate ABC transporter permease protein phnE1 (TC 3.A.1.9.1)               | fig 439375.7.peg.2294                                                                                                        |                                                                                                                                                        |                       |                       |

|                                                          |                                                                                                  |                                                                                                                                                                                   |                                                                                                                                                                                                             |
|----------------------------------------------------------|--------------------------------------------------------------------------------------------------|-----------------------------------------------------------------------------------------------------------------------------------------------------------------------------------|-------------------------------------------------------------------------------------------------------------------------------------------------------------------------------------------------------------|
| (TC 3.A.1.9.1)                                           | Phosphonate ABC transporter permease protein phnE2 (TC 3.A.1.9.1)                                | fig 439375.7.peg.2295                                                                                                                                                             |                                                                                                                                                                                                             |
|                                                          | Phosphonate ABC transporter phosphate-binding periplasmic component (TC 3.A.1.9.1)               | fig 439375.7.peg.2296                                                                                                                                                             |                                                                                                                                                                                                             |
|                                                          | Branched-chain amino acid ABC transporter, amino acid-binding protein (TC 3.A.1.4.1)             | fig 439375.7.peg.1992,<br>fig 439375.7.peg.4571,<br>fig 439375.7.peg.4661                                                                                                         | fig 204722.5.peg.1315                                                                                                                                                                                       |
|                                                          | Branched-chain amino acid transport ATP-binding protein LivF (TC 3.A.1.4.1)                      | fig 439375.7.peg.1165,<br>fig 439375.7.peg.1468,<br>fig 439375.7.peg.3898,<br>fig 439375.7.peg.4176,<br>fig 439375.7.peg.4573,<br>fig 439375.7.peg.4597,<br>fig 439375.7.peg.4660 | fig 204722.5.peg.1814,<br>fig 204722.5.peg.1815,<br>fig 204722.5.peg.2250,<br>fig 204722.5.peg.2608,<br>fig 204722.5.peg.2865,<br>fig 204722.5.peg.3176,<br>fig 204722.5.peg.3407,<br>fig 204722.5.peg.3428 |
|                                                          | Branched-chain amino acid transport ATP-binding protein LivG (TC 3.A.1.4.1)                      | fig 439375.7.peg.1164,<br>fig 439375.7.peg.1469,<br>fig 439375.7.peg.3897,<br>fig 439375.7.peg.4598,<br>fig 439375.7.peg.4662                                                     | fig 204722.5.peg.1816,<br>fig 204722.5.peg.2249,<br>fig 204722.5.peg.2606,<br>fig 204722.5.peg.2607,<br>fig 204722.5.peg.2864,<br>fig 204722.5.peg.3175,<br>fig 204722.5.peg.3427                           |
| ABC transporter branched-chain amino acid (TC 3.A.1.4.1) | Branched-chain amino acid transport system permease protein LivM (TC 3.A.1.4.1)                  | fig 439375.7.peg.1163,<br>fig 439375.7.peg.1466,<br>fig 439375.7.peg.3896,<br>fig 439375.7.peg.4174,<br>fig 439375.7.peg.4575,<br>fig 439375.7.peg.4599                           | fig 204722.5.peg.1817,<br>fig 204722.5.peg.2248,<br>fig 204722.5.peg.2863,<br>fig 204722.5.peg.3178,<br>fig 204722.5.peg.3425,<br>fig 204722.5.peg.3426                                                     |
|                                                          | High-affinity branched-chain amino acid transport system permease protein LivH (TC 3.A.1.4.1)    | fig 439375.7.peg.1162,<br>fig 439375.7.peg.1467,<br>fig 439375.7.peg.3895,<br>fig 439375.7.peg.4173,<br>fig 439375.7.peg.4576,<br>fig 439375.7.peg.4600,<br>fig 439375.7.peg.4659 | fig 204722.5.peg.1818,<br>fig 204722.5.peg.2247,<br>fig 204722.5.peg.2605,<br>fig 204722.5.peg.2862,<br>fig 204722.5.peg.3177,<br>fig 204722.5.peg.3405,<br>fig 204722.5.peg.3424                           |
|                                                          | High-affinity leucine-specific transport system, periplasmic binding protein LivK (TC 3.A.1.4.1) | fig 439375.7.peg.1167,<br>fig 439375.7.peg.1168,<br>fig 439375.7.peg.4601                                                                                                         | fig 204722.5.peg.1810,<br>fig 204722.5.peg.1812,<br>fig 204722.5.peg.2604,<br>fig 204722.5.peg.2613,<br>fig 204722.5.peg.3423                                                                               |
|                                                          | Dipeptide transport ATP-binding protein DppD (TC 3.A.1.5.2)                                      | fig 439375.7.peg.665,<br>fig 439375.7.peg.1353,<br>fig 439375.7.peg.1669,<br>fig 439375.7.peg.2003,<br>fig 439375.7.peg.3241,<br>fig 439375.7.peg.3902,<br>fig 439375.7.peg.3970  | fig 204722.5.peg.1608,<br>fig 204722.5.peg.3234                                                                                                                                                             |

Membrane Transport

ABC transporters

|                                                                                            |                                                                                                                                                                                                                                                                                                                                                                                                                                                                                                                  |
|--------------------------------------------------------------------------------------------|------------------------------------------------------------------------------------------------------------------------------------------------------------------------------------------------------------------------------------------------------------------------------------------------------------------------------------------------------------------------------------------------------------------------------------------------------------------------------------------------------------------|
|                                                                                            | <p>fig 439375.7.peg.1354,<br/>fig 439375.7.peg.1670, fig 204722.5.peg.1607,<br/>fig 439375.7.peg.2002, fig 204722.5.peg.3233,<br/>fig 439375.7.peg.3110 fig 204722.5.peg.3319</p>                                                                                                                                                                                                                                                                                                                                |
|                                                                                            | <p>fig 439375.7.peg.667,<br/>fig 439375.7.peg.1351,<br/>fig 439375.7.peg.1667,<br/>fig 439375.7.peg.2005,<br/>fig 439375.7.peg.2603,<br/>fig 439375.7.peg.3108,<br/>fig 439375.7.peg.3239,<br/>fig 439375.7.peg.3277,<br/>fig 439375.7.peg.3904, fig 204722.5.peg.1610,<br/>fig 439375.7.peg.3968, fig 204722.5.peg.3236,<br/>fig 439375.7.peg.4876 fig 204722.5.peg.3316</p>                                                                                                                                    |
| ABC transporter dipeptide (TC 3.A.1.5.2)                                                   | <p>fig 439375.7.peg.668,<br/>fig 439375.7.peg.1352,<br/>fig 439375.7.peg.1668,<br/>fig 439375.7.peg.2004,<br/>fig 439375.7.peg.2604,<br/>fig 439375.7.peg.2923,<br/>fig 439375.7.peg.3137,<br/>fig 439375.7.peg.3240,<br/>fig 439375.7.peg.3278,<br/>fig 439375.7.peg.3473,<br/>fig 439375.7.peg.3903,<br/>fig 439375.7.peg.3967, fig 204722.5.peg.1609,<br/>fig 439375.7.peg.4300, fig 204722.5.peg.3235,<br/>fig 439375.7.peg.4785, fig 204722.5.peg.3304,<br/>fig 439375.7.peg.4877 fig 204722.5.peg.3317</p> |
|                                                                                            | <p>fig 439375.7.peg.666,<br/>fig 439375.7.peg.1350,<br/>fig 439375.7.peg.1666,<br/>fig 439375.7.peg.2006,<br/>fig 439375.7.peg.3107,<br/>fig 439375.7.peg.3135,<br/>fig 439375.7.peg.3238,<br/>fig 439375.7.peg.3276, fig 204722.5.peg.1611,<br/>fig 439375.7.peg.3686, fig 204722.5.peg.1612,<br/>fig 439375.7.peg.3905, fig 204722.5.peg.1613,<br/>fig 439375.7.peg.3969, fig 204722.5.peg.3237,<br/>fig 439375.7.peg.4581 fig 204722.5.peg.3308</p>                                                           |
| Dipeptide transport ATP-binding protein DppF (TC 3.A.1.5.2)                                |                                                                                                                                                                                                                                                                                                                                                                                                                                                                                                                  |
| Dipeptide transport system permease protein DppB (TC 3.A.1.5.2)                            |                                                                                                                                                                                                                                                                                                                                                                                                                                                                                                                  |
| Dipeptide transport system permease protein DppC (TC 3.A.1.5.2)                            |                                                                                                                                                                                                                                                                                                                                                                                                                                                                                                                  |
| Dipeptide-binding ABC transporter, periplasmic substrate-binding component (TC 3.A.1.5.2)  |                                                                                                                                                                                                                                                                                                                                                                                                                                                                                                                  |
| Oligopeptide ABC transporter, periplasmic oligopeptide-binding protein OppA (TC 3.A.1.5.1) | <p>fig 439375.7.peg.2607,<br/>fig 439375.7.peg.2908,<br/>fig 439375.7.peg.3756,<br/>fig 439375.7.peg.3758,<br/>fig 439375.7.peg.3759, fig 204722.5.peg.2752,<br/>fig 439375.7.peg.4787 fig 204722.5.peg.2753</p>                                                                                                                                                                                                                                                                                                 |

|                            |                                                                    |                                                                                                                                |                                                                                                                                                                                                                                                                 |
|----------------------------|--------------------------------------------------------------------|--------------------------------------------------------------------------------------------------------------------------------|-----------------------------------------------------------------------------------------------------------------------------------------------------------------------------------------------------------------------------------------------------------------|
|                            |                                                                    |                                                                                                                                | fig 439375.7.peg.3279,<br>fig 439375.7.peg.3948,<br>fig 439375.7.peg.4301, fig 204722.5.peg.2618,<br>fig 439375.7.peg.4784 fig 204722.5.peg.3318                                                                                                                |
|                            | ABC transporter oligopeptide (TC 3.A.1.5.1)                        |                                                                                                                                | fig 439375.7.peg.2605,<br>fig 439375.7.peg.3242, fig 204722.5.peg.2617,<br>fig 439375.7.peg.3901, fig 204722.5.peg.2997,<br>fig 439375.7.peg.4137, fig 204722.5.peg.3302,<br>fig 439375.7.peg.4878 fig 204722.5.peg.3326                                        |
|                            |                                                                    |                                                                                                                                | fig 204722.5.peg.7,<br>fig 439375.7.peg.11, fig 204722.5.peg.9,<br>fig 439375.7.peg.13, fig 204722.5.peg.2749,<br>fig 439375.7.peg.3474, fig 204722.5.peg.2751,<br>fig 439375.7.peg.3760, fig 204722.5.peg.3305,<br>fig 439375.7.peg.3762 fig 204722.5.peg.3322 |
|                            | Oligopeptide transport system permease protein OppB (TC 3.A.1.5.1) |                                                                                                                                | fig 439375.7.peg.12, fig 204722.5.peg.8,<br>fig 439375.7.peg.3761, fig 204722.5.peg.2750,<br>fig 439375.7.peg.4139 fig 204722.5.peg.2999                                                                                                                        |
|                            | Oligopeptide transport system permease protein OppC (TC 3.A.1.5.1) |                                                                                                                                | fig 439375.7.peg.2535 fig 204722.5.peg.835                                                                                                                                                                                                                      |
| <b>Lipoprotein sorting</b> | Lipoprotein sorting system                                         |                                                                                                                                | fig 439375.7.peg.2536 fig 204722.5.peg.834                                                                                                                                                                                                                      |
|                            |                                                                    | Choline ABC transporter ATP-binding protein                                                                                    | fig 204722.5.peg.3418                                                                                                                                                                                                                                           |
|                            | Choline Transport                                                  | Choline ABC transporter permease protein                                                                                       | fig 204722.5.peg.3419                                                                                                                                                                                                                                           |
|                            |                                                                    | Choline-binding lipoprotein                                                                                                    | fig 204722.5.peg.3417                                                                                                                                                                                                                                           |
|                            |                                                                    | Choline-sulfatase (EC 3.1.6.6)                                                                                                 | fig 439375.7.peg.3478 fig 204722.5.peg.3416                                                                                                                                                                                                                     |
|                            |                                                                    | ATPase component NikO of energizing module of nickel ECF transporter                                                           | fig 204722.5.peg.1390                                                                                                                                                                                                                                           |
|                            | ECF class transporters                                             | Substrate-specific component BioY of biotin ECF transporter                                                                    | fig 439375.7.peg.729, fig 204722.5.peg.522,<br>fig 439375.7.peg.1251 fig 204722.5.peg.1746                                                                                                                                                                      |
|                            |                                                                    | Substrate-specific component NikM of nickel ECF transporter                                                                    | fig 204722.5.peg.1387                                                                                                                                                                                                                                           |
|                            |                                                                    | Transmembrane component NikQ of energizing module of nickel ECF transporter                                                    | fig 204722.5.peg.1389                                                                                                                                                                                                                                           |
|                            | Ferrous iron transporter EfeUOB, low-pH-induced                    | Ferrous iron transport periplasmic protein EfeO, contains peptidase-M75 domain and (frequently) cupredoxin-like domain         | fig 439375.7.peg.4024,<br>fig 439375.7.peg.4026                                                                                                                                                                                                                 |
|                            |                                                                    | Ferrous iron transport permease EfeU                                                                                           | fig 439375.7.peg.4027                                                                                                                                                                                                                                           |
|                            |                                                                    | Ferrous iron transport peroxidase EfeB                                                                                         | fig 439375.7.peg.4025                                                                                                                                                                                                                                           |
|                            |                                                                    | Binding-protein-dependent transport systems inner membrane component:ATP/GTP-binding site motif A (P-loop) :TrkA-N:Potassium e | fig 439375.7.peg.1959 fig 204722.5.peg.1349                                                                                                                                                                                                                     |
|                            | Potassium homeostasis                                              | Kup system potassium uptake protein                                                                                            | fig 439375.7.peg.1912 fig 204722.5.peg.1407                                                                                                                                                                                                                     |
|                            |                                                                    | Large-conductance mechanosensitive channel                                                                                     | fig 439375.7.peg.436 fig 204722.5.peg.331                                                                                                                                                                                                                       |
|                            |                                                                    | Osmosensitive K+ channel histidine kinase KdpD (EC 2.7.3.-)                                                                    | fig 439375.7.peg.3943                                                                                                                                                                                                                                           |
|                            |                                                                    | Potassium efflux system KefA protein                                                                                           | fig 204722.5.peg.1345,<br>fig 204722.5.peg.1346                                                                                                                                                                                                                 |
|                            |                                                                    | Potassium uptake protein TrkH                                                                                                  | fig 439375.7.peg.1753 fig 204722.5.peg.1526                                                                                                                                                                                                                     |
|                            |                                                                    | Potassium-transporting ATPase A chain (EC 3.6.3.12) (TC 3.A.3.7.1)                                                             | fig 439375.7.peg.3939                                                                                                                                                                                                                                           |

**Membrane Transport**

| Membrane Transport               |                                     |                                                                                |                                                 |                                                                         |                                               |
|----------------------------------|-------------------------------------|--------------------------------------------------------------------------------|-------------------------------------------------|-------------------------------------------------------------------------|-----------------------------------------------|
| Transport of Nickel and Cobalt   |                                     | Potassium-transporting ATPase B chain (EC 3.6.3.12) (TC 3.A.3.7.1)             | fig 439375.7.peg.3941                           |                                                                         |                                               |
|                                  |                                     | Potassium-transporting ATPase C chain (EC 3.6.3.12) (TC 3.A.3.7.1)             | fig 439375.7.peg.3942                           |                                                                         |                                               |
|                                  |                                     | putative Glutathione-regulated potassium-efflux system protein KefB            | fig 439375.7.peg.3192                           | fig 204722.5.peg.2427                                                   |                                               |
|                                  |                                     | Trk system potassium uptake protein TrkA                                       | fig 439375.7.peg.2322                           | fig 204722.5.peg.1134                                                   |                                               |
|                                  |                                     | Additional component NikL of nickel ECF transporter                            |                                                 | fig 204722.5.peg.1388                                                   |                                               |
|                                  |                                     | Additional periplasmic component NikK of nickel ECF transporter                | fig 439375.7.peg.4346                           | fig 204722.5.peg.1386                                                   |                                               |
|                                  |                                     | ATPase component NikO of energizing module of nickel ECF transporter           |                                                 | fig 204722.5.peg.1390                                                   |                                               |
|                                  |                                     | Nickel ABC transporter, periplasmic nickel-binding protein NikA (TC 3.A.1.5.3) |                                                 | fig 204722.5.peg.3020                                                   |                                               |
|                                  |                                     | Nickel responsive regulator NikR                                               |                                                 | fig 204722.5.peg.3021                                                   |                                               |
|                                  |                                     | Nickel transport ATP-binding protein NikD (TC 3.A.1.5.3)                       |                                                 | fig 204722.5.peg.3017                                                   |                                               |
|                                  |                                     | Nickel transport ATP-binding protein NikE (TC 3.A.1.5.3)                       |                                                 | fig 204722.5.peg.3016                                                   |                                               |
|                                  |                                     | Nickel transport system permease protein NikB (TC 3.A.1.5.3)                   |                                                 | fig 204722.5.peg.3019                                                   |                                               |
|                                  |                                     | Nickel transport system permease protein NikC (TC 3.A.1.5.3)                   |                                                 | fig 204722.5.peg.3018                                                   |                                               |
|                                  |                                     | HupE-UreJ family metal transporter                                             | fig 439375.7.peg.355,<br>fig 439375.7.peg.2573  |                                                                         |                                               |
|                                  |                                     | Predicted cobalt transporter CbtA                                              | fig 439375.7.peg.1974                           | fig 204722.5.peg.1331                                                   |                                               |
|                                  |                                     | Substrate-specific component NikM of nickel ECF transporter                    |                                                 | fig 204722.5.peg.1387                                                   |                                               |
|                                  |                                     | Transmembrane component NikQ of energizing module of nickel ECF transporter    |                                                 | fig 204722.5.peg.1389                                                   |                                               |
|                                  | Uni- Sym- and Antiporters           | Na(+)/H(+) antiporter                                                          | Na+/H+ antiporter NhaA type                     | fig 439375.7.peg.549,<br>fig 439375.7.peg.550,<br>fig 439375.7.peg.2565 | fig 204722.5.peg.412,<br>fig 204722.5.peg.413 |
|                                  |                                     | Sodium Hydrogen Antiporter                                                     | Na(+)/H(+) antiporter subunit A                 | fig 439375.7.peg.3689                                                   | fig 204722.5.peg.2717                         |
|                                  |                                     |                                                                                | Na(+)/H(+) antiporter subunit B                 | fig 439375.7.peg.3689                                                   | fig 204722.5.peg.2717                         |
| Na(+)/H(+) antiporter subunit C  |                                     |                                                                                | fig 439375.7.peg.3690                           | fig 204722.5.peg.2718                                                   |                                               |
| Na(+)/H(+) antiporter subunit D  |                                     |                                                                                | fig 439375.7.peg.3691                           | fig 204722.5.peg.2719                                                   |                                               |
| Na(+)/H(+) antiporter subunit E  |                                     |                                                                                | fig 439375.7.peg.3692                           | fig 204722.5.peg.2720                                                   |                                               |
| Na(+)/H(+) antiporter subunit F  |                                     |                                                                                | fig 439375.7.peg.3693                           | fig 204722.5.peg.2721                                                   |                                               |
| Na(+)/H(+) antiporter subunit G  |                                     |                                                                                | fig 439375.7.peg.3694                           | fig 204722.5.peg.2722                                                   |                                               |
| Metabolism of Aromatic Compounds | Aromatic Amin Catabolism            | 4-hydroxyphenylacetate 3-monooxygenase, reductase component (EC 1.6.8.-)       | fig 439375.7.peg.1993,<br>fig 439375.7.peg.4531 | fig 204722.5.peg.1314                                                   |                                               |
|                                  |                                     | Nitritotriacetate monooxygenase component B (EC 1.14.13.-)                     | fig 439375.7.peg.2259                           | fig 204722.5.peg.1082                                                   |                                               |
|                                  | Gentisate degradation               | Fumarylacetoacetate hydrolase family protein                                   | fig 439375.7.peg.75,<br>fig 439375.7.peg.3926   | fig 204722.5.peg.66                                                     |                                               |
|                                  |                                     |                                                                                | fig 439375.7.peg.75,<br>fig 439375.7.peg.3926   | fig 204722.5.peg.66                                                     |                                               |
|                                  | Salicylate and gentisate catabolism | Fumarylacetoacetate hydrolase family protein                                   | fig 439375.7.peg.2681,<br>fig 439375.7.peg.4569 | fig 204722.5.peg.760,<br>fig 204722.5.peg.973                           |                                               |
|                                  |                                     |                                                                                | Salicylate hydroxylase (EC 1.14.13.1)           | fig 439375.7.peg.4569                                                   | fig 204722.5.peg.973                          |
|                                  |                                     | 2,4-dihydroxyhept-2-ene-1,7-dioic acid aldolase (EC 4.1.2.-)                   |                                                 | fig 204722.5.peg.3387                                                   |                                               |

Metabolism of Aromatic Compounds

Metabolism of central aromatic intermediates

|                                                    |                                                                            |                                                                            |                                                            |                       |
|----------------------------------------------------|----------------------------------------------------------------------------|----------------------------------------------------------------------------|------------------------------------------------------------|-----------------------|
| 4-Hydroxyphenylacetic acid catabolic pathway       | 2-hydroxyhepta-2,4-diene-1,7-dioate isomerase (EC 5.3.3.-)                 |                                                                            | fig 204722.5.peg.3389                                      |                       |
|                                                    | 2-oxo-hepta-3-ene-1,7-dioic acid hydratase (EC 4.2.-.-)                    |                                                                            | fig 204722.5.peg.3388                                      |                       |
|                                                    | 4-hydroxyphenylacetate 3-monooxygenase, reductase component (EC 1.6.8.-)   |                                                                            | fig 204722.5.peg.1314                                      |                       |
|                                                    | 5-carboxymethyl-2-hydroxymuconate delta-isomerase (EC 5.3.3.10)            |                                                                            | fig 204722.5.peg.3393                                      |                       |
|                                                    | 5-carboxymethyl-2-hydroxymuconate semialdehyde dehydrogenase (EC 1.2.1.60) |                                                                            | fig 204722.5.peg.3392                                      |                       |
|                                                    | 5-carboxymethyl-2-oxo-hex-3-ene-1,7-dioate decarboxylase (EC 4.1.1.68)     |                                                                            | fig 204722.5.peg.3389                                      |                       |
|                                                    | Homoprotocatechuate degradative operon repressor                           |                                                                            | fig 204722.5.peg.3394                                      |                       |
|                                                    | Catechol branch of beta-ketoadipate pathway                                | 3-oxoadipate CoA-transferase subunit A (EC 2.8.3.6)                        | fig 439375.7.peg.3884                                      | fig 204722.5.peg.2851 |
|                                                    |                                                                            | 3-oxoadipate CoA-transferase subunit B (EC 2.8.3.6)                        | fig 439375.7.peg.3883                                      | fig 204722.5.peg.2850 |
|                                                    |                                                                            | Beta-ketoadipate enol-lactone hydrolase (EC 3.1.1.24)                      | fig 439375.7.peg.3889                                      | fig 204722.5.peg.2856 |
|                                                    |                                                                            | mandelate racemase/muconate lactonizing enzyme family protein              | fig 439375.7.peg.335                                       | fig 204722.5.peg.245  |
|                                                    |                                                                            | Muconate cycloisomerase (EC 5.5.1.1)                                       | fig 439375.7.peg.2211                                      | fig 204722.5.peg.1030 |
|                                                    | Central meta-cleavage pathway of aromatic compound degradation             | 2-oxo-hepta-3-ene-1,7-dioic acid hydratase (EC 4.2.-.-)                    |                                                            | fig 204722.5.peg.3388 |
|                                                    |                                                                            | 5-carboxymethyl-2-hydroxymuconate delta-isomerase (EC 5.3.3.10)            |                                                            | fig 204722.5.peg.3393 |
|                                                    |                                                                            | 5-carboxymethyl-2-hydroxymuconate semialdehyde dehydrogenase (EC 1.2.1.60) |                                                            | fig 204722.5.peg.3392 |
|                                                    | Protocatechuate branch of beta-ketoadipate pathway                         | 3-carboxy-cis,cis-muconate cycloisomerase (EC 5.5.1.2)                     | fig 439375.7.peg.3893                                      | fig 204722.5.peg.2860 |
|                                                    |                                                                            | 3-oxoadipate CoA-transferase subunit A (EC 2.8.3.6)                        | fig 439375.7.peg.3884                                      | fig 204722.5.peg.2851 |
|                                                    |                                                                            | 3-oxoadipate CoA-transferase subunit B (EC 2.8.3.6)                        | fig 439375.7.peg.3883                                      | fig 204722.5.peg.2850 |
|                                                    |                                                                            | 4-carboxymuconolactone decarboxylase (EC 4.1.1.44)                         | fig 439375.7.peg.3890                                      | fig 204722.5.peg.2857 |
|                                                    |                                                                            | Beta-ketoadipate enol-lactone hydrolase (EC 3.1.1.24)                      | fig 439375.7.peg.3889                                      | fig 204722.5.peg.2856 |
|                                                    |                                                                            |                                                                            | fig 439375.7.peg.3882,                                     |                       |
|                                                    |                                                                            | Beta-ketoadipyl CoA thiolase (EC 2.3.1.-)                                  | fig 439375.7.peg.4196                                      | fig 204722.5.peg.2849 |
|                                                    |                                                                            | Pca regulon regulatory protein PcaR                                        | fig 439375.7.peg.3885                                      | fig 204722.5.peg.2852 |
|                                                    |                                                                            |                                                                            |                                                            |                       |
|                                                    |                                                                            |                                                                            | Protocatechuate 3,4-dioxygenase alpha chain (EC 1.13.11.3) | fig 439375.7.peg.3892 |
|                                                    |                                                                            | Protocatechuate 3,4-dioxygenase beta chain (EC 1.13.11.3)                  | fig 439375.7.peg.3891                                      | fig 204722.5.peg.2858 |
|                                                    | Benzoate catabolism                                                        | Acetyl-CoA C-acyltransferase (EC 2.3.1.16)                                 | fig 439375.7.peg.3257                                      | fig 204722.5.peg.2666 |
| Muconate cycloisomerase (EC 5.5.1.1)               |                                                                            | fig 439375.7.peg.2211                                                      | fig 204722.5.peg.1030                                      |                       |
| Benzoate degradation                               | benzoate MFS transporter BenK                                              | fig 439375.7.peg.4186                                                      |                                                            |                       |
|                                                    | Benzoate transport protein                                                 | fig 439375.7.peg.850,<br>fig 439375.7.peg.4309                             | fig 204722.5.peg.2152                                      |                       |
| Chloroaromatic degradation pathway                 | 3-oxoadipate CoA-transferase subunit A (EC 2.8.3.6)                        | fig 439375.7.peg.3884                                                      | fig 204722.5.peg.2851                                      |                       |
|                                                    | 3-oxoadipate CoA-transferase subunit B (EC 2.8.3.6)                        | fig 439375.7.peg.3883                                                      | fig 204722.5.peg.2850                                      |                       |
|                                                    | Beta-ketoadipate enol-lactone hydrolase (EC 3.1.1.24)                      | fig 439375.7.peg.3889                                                      | fig 204722.5.peg.2856                                      |                       |
|                                                    |                                                                            | fig 439375.7.peg.3882,                                                     |                                                            |                       |
|                                                    | Beta-ketoadipyl CoA thiolase (EC 2.3.1.-)                                  | fig 439375.7.peg.4196                                                      | fig 204722.5.peg.2849                                      |                       |
| Flagellar basal-body rod modification protein FlgD | Flagellar basal-body rod modification protein FlgD                         | fig 439375.7.peg.4359                                                      | fig 204722.5.peg.3362                                      |                       |
|                                                    | Flagellar biosynthesis protein FlhA                                        | fig 439375.7.peg.4357                                                      | fig 204722.5.peg.3360                                      |                       |
|                                                    | Flagellar biosynthesis protein FlhB                                        | fig 439375.7.peg.4393                                                      | fig 204722.5.peg.2341                                      |                       |
|                                                    | Flagellar biosynthesis protein FlhR                                        | fig 439375.7.peg.4356                                                      | fig 204722.5.peg.3359                                      |                       |
|                                                    | Flagellar L-ring protein FlgH                                              | fig 439375.7.peg.4376                                                      | fig 204722.5.peg.2375                                      |                       |
|                                                    | Flagellar motor rotation protein MotA                                      | fig 439375.7.peg.4388                                                      | fig 204722.5.peg.2347                                      |                       |

Motility and Chemotaxis

Flagellar motility in Prokaryota

|                                                               |                                       |                                                                    |                                              |
|---------------------------------------------------------------|---------------------------------------|--------------------------------------------------------------------|----------------------------------------------|
| Flagellar motility                                            | Flagellar motor rotation protein MotB | fig 439375.7.peg.1256, fig 439375.7.peg.4369                       | fig 204722.5.peg.1740, fig 204722.5.peg.3373 |
|                                                               | Flagellar motor switch protein FliM   | fig 439375.7.peg.4389                                              | fig 204722.5.peg.2346                        |
|                                                               | Flagellar motor switch protein FliN   | fig 439375.7.peg.4391                                              | fig 204722.5.peg.2344                        |
|                                                               | Flagellum-specific ATP synthase FliI  | fig 439375.7.peg.4385                                              | fig 204722.5.peg.2350                        |
|                                                               | RNA polymerase sigma-54 factor RpoN   | fig 439375.7.peg.181, fig 439375.7.peg.1307, fig 439375.7.peg.3554 | fig 204722.5.peg.164                         |
|                                                               | Rrf2 family transcriptional regulator | fig 439375.7.peg.4344, fig 439375.7.peg.4530                       | fig 204722.5.peg.3348                        |
|                                                               | Flagellum                             | Flagellar basal-body P-ring formation protein FlgA                 | fig 439375.7.peg.4379                        |
| Flagellar basal-body rod modification protein FlgD            |                                       | fig 439375.7.peg.4359                                              | fig 204722.5.peg.3362                        |
| Flagellar basal-body rod protein FlgB                         |                                       | fig 439375.7.peg.4383                                              | fig 204722.5.peg.2368                        |
| Flagellar basal-body rod protein FlgC                         |                                       | fig 439375.7.peg.4382                                              | fig 204722.5.peg.2369                        |
| Flagellar basal-body rod protein FlgF                         |                                       | fig 439375.7.peg.4386, fig 439375.7.peg.4387                       | fig 204722.5.peg.2348, fig 204722.5.peg.2349 |
| Flagellar basal-body rod protein FlgG                         |                                       | fig 439375.7.peg.4380                                              | fig 204722.5.peg.2371                        |
| Flagellar biosynthesis protein FlhA                           |                                       | fig 439375.7.peg.4357                                              | fig 204722.5.peg.3360                        |
| Flagellar biosynthesis protein FlhB                           |                                       | fig 439375.7.peg.4393                                              | fig 204722.5.peg.2341                        |
| Flagellar biosynthesis protein FliL                           |                                       | fig 439375.7.peg.4375                                              | fig 204722.5.peg.2376                        |
| Flagellar biosynthesis protein FliP                           |                                       | fig 439375.7.peg.4374                                              | fig 204722.5.peg.2377                        |
| Flagellar biosynthesis protein FliQ                           |                                       | fig 439375.7.peg.4358                                              | fig 204722.5.peg.3361                        |
| Flagellar biosynthesis protein FliR                           |                                       | fig 439375.7.peg.4356                                              | fig 204722.5.peg.3359                        |
| Flagellar hook protein FlgE                                   |                                       | fig 439375.7.peg.4364                                              | fig 204722.5.peg.3367                        |
| Flagellar hook-associated protein FlgK                        |                                       | fig 439375.7.peg.4363                                              | fig 204722.5.peg.3366                        |
| Flagellar hook-associated protein FlgL                        |                                       | fig 439375.7.peg.4362                                              | fig 204722.5.peg.3365                        |
| Flagellar hook-basal body complex protein FliE                |                                       | fig 439375.7.peg.4381                                              | fig 204722.5.peg.2370                        |
| Flagellar hook-length control protein FliK                    |                                       | fig 439375.7.peg.4367                                              | fig 204722.5.peg.3370                        |
| Flagellar L-ring protein FlgH                                 |                                       | fig 439375.7.peg.4376                                              | fig 204722.5.peg.2375                        |
| Flagellar motor rotation protein MotA                         |                                       | fig 439375.7.peg.4388                                              | fig 204722.5.peg.2347                        |
| Flagellar motor rotation protein MotB                         |                                       | fig 439375.7.peg.1256, fig 439375.7.peg.4369                       | fig 204722.5.peg.1740, fig 204722.5.peg.3373 |
| Flagellar motor switch protein FliG                           |                                       | fig 439375.7.peg.4392                                              | fig 204722.5.peg.2342, fig 204722.5.peg.2343 |
| Flagellar motor switch protein FliM                           |                                       | fig 439375.7.peg.4389                                              | fig 204722.5.peg.2346                        |
| Flagellar motor switch protein FliN                           |                                       | fig 439375.7.peg.4391                                              | fig 204722.5.peg.2344                        |
| Flagellar M-ring protein FliF                                 |                                       | fig 439375.7.peg.4371                                              | fig 204722.5.peg.3375                        |
| Flagellar P-ring protein FlgI                                 |                                       | fig 439375.7.peg.4378                                              | fig 204722.5.peg.2373                        |
| Flagellar protein FlgJ [peptidoglycan hydrolase] (EC 3.2.1.-) |                                       | fig 439375.7.peg.4354                                              | fig 204722.5.peg.3357                        |
| Flagellar protein FliJ                                        |                                       | fig 439375.7.peg.1652                                              | fig 204722.5.peg.1627                        |
| Flagellin protein FlaA                                        |                                       | fig 439375.7.peg.4372                                              | fig 204722.5.peg.3377                        |
| Flagellum-specific ATP synthase FliI                          |                                       | fig 439375.7.peg.4385                                              | fig 204722.5.peg.2350                        |
| RNA polymerase sigma factor RpoD                              |                                       | fig 439375.7.peg.1780                                              | fig 204722.5.peg.1506                        |
| RNA polymerase sigma-54 factor RpoN                           |                                       | fig 439375.7.peg.181, fig 439375.7.peg.1307, fig 439375.7.peg.3554 | fig 204722.5.peg.164                         |
| Chemotaxis protein methyltransferase CheR (EC 2.1.1.80)       |                                       | fig 439375.7.peg.1302, fig 439375.7.peg.4865                       | fig 204722.5.peg.1681                        |

|                            |                                |                      |                                                                                                                                                                                                                                                                                                                                                                                                                                                                                                                                                                                                                                                                                                                                                                                                                                                                                                                                                                                                                                                                                                                                                                                                                                                                                                                                                                                                                                       |
|----------------------------|--------------------------------|----------------------|---------------------------------------------------------------------------------------------------------------------------------------------------------------------------------------------------------------------------------------------------------------------------------------------------------------------------------------------------------------------------------------------------------------------------------------------------------------------------------------------------------------------------------------------------------------------------------------------------------------------------------------------------------------------------------------------------------------------------------------------------------------------------------------------------------------------------------------------------------------------------------------------------------------------------------------------------------------------------------------------------------------------------------------------------------------------------------------------------------------------------------------------------------------------------------------------------------------------------------------------------------------------------------------------------------------------------------------------------------------------------------------------------------------------------------------|
| <b>Nitrogen Metabolism</b> | <b>Motility and Chemotaxis</b> | Bacterial Chemotaxis | <p>fig 439375.7.peg.666,<br/>fig 439375.7.peg.1350,<br/>fig 439375.7.peg.1666,<br/>fig 439375.7.peg.2006,<br/>fig 439375.7.peg.3107,<br/>fig 439375.7.peg.3135,<br/>fig 439375.7.peg.3238,<br/>fig 439375.7.peg.3276, fig 204722.5.peg.1611,<br/>fig 439375.7.peg.3686, fig 204722.5.peg.1612,<br/>fig 439375.7.peg.3905, fig 204722.5.peg.1613,<br/>fig 439375.7.peg.3969, fig 204722.5.peg.3237,<br/>fig 439375.7.peg.4581 fig 204722.5.peg.3308<br/>fig 204722.5.peg.2342,</p> <p>Dipeptide-binding ABC transporter, periplasmic substrate-binding component (TC 3.A.1.5.2)</p> <p>Flagellar motor switch protein FliG fig 439375.7.peg.4392 fig 204722.5.peg.2343</p> <p>Flagellar motor switch protein FliM fig 439375.7.peg.4389 fig 204722.5.peg.2346</p> <p>Flagellar motor switch protein FliN fig 439375.7.peg.4391 fig 204722.5.peg.2344</p> <p>Maltose/maltodextrin ABC transporter, substrate binding periplasmic protein MalE fig 439375.7.peg.331, fig 204722.5.peg.241,<br/>fig 439375.7.peg.3088 fig 204722.5.peg.2520</p> <p>Ribose ABC transporter, periplasmic ribose-binding protein RbsB (TC 3.A.1.2.1) fig 439375.7.peg.3500,<br/>fig 439375.7.peg.3566, fig 204722.5.peg.562,<br/>fig 439375.7.peg.4241, fig 204722.5.peg.1659,<br/>fig 439375.7.peg.4991 fig 204722.5.peg.3220</p>                                                                                                                           |
|                            | <b>Nitrogen Metabolism</b>     | Ammonia assimilation | <p>[Protein-Pil] uridylyltransferase (EC 2.7.7.59) fig 439375.7.peg.167 fig 204722.5.peg.150</p> <p>Ammonium transporter fig 439375.7.peg.1005 fig 204722.5.peg.1930</p> <p>Glutamate synthase [NADPH] large chain (EC 1.4.1.13) fig 439375.7.peg.4450 fig 204722.5.peg.2274</p> <p>Glutamate synthase [NADPH] small chain (EC 1.4.1.13) fig 439375.7.peg.4449 fig 204722.5.peg.2275</p> <p>Glutamate-ammonia-ligase adenyltransferase (EC 2.7.7.42) fig 439375.7.peg.2809 fig 204722.5.peg.631</p> <p>Glutamine synthetase type I (EC 6.3.1.2) fig 439375.7.peg.2193 fig 204722.5.peg.1015</p> <p>Glutamine synthetase type II, eukaryotic (EC 6.3.1.2) fig 439375.7.peg.4328</p> <p>Nitrogen regulation protein NR(II) (EC 2.7.3.-) fig 439375.7.peg.2177 fig 204722.5.peg.1138</p> <p>Nitrogen regulatory protein P-II fig 439375.7.peg.2194 fig 204722.5.peg.1016</p>                                                                                                                                                                                                                                                                                                                                                                                                                                                                                                                                                             |
|                            |                                | Denitrification      | <p>fig 439375.7.peg.1158,<br/>fig 439375.7.peg.4554 fig 204722.5.peg.2475</p> <p>Nitric oxide reductase activation protein NorD fig 439375.7.peg.4565 fig 204722.5.peg.2467</p> <p>Nitric oxide reductase activation protein NorE fig 439375.7.peg.4560 fig 204722.5.peg.2462</p> <p>Nitric oxide reductase activation protein NorQ fig 439375.7.peg.4564 fig 204722.5.peg.2466</p> <p>Nitric oxide -responding transcriptional regulator NnrR fig 439375.7.peg.3264, fig 204722.5.peg.2477,<br/>(Crp/Fnr family) fig 439375.7.peg.4556 fig 204722.5.peg.2498</p> <p>Nitric-oxide reductase subunit B (EC 1.7.99.7) fig 439375.7.peg.4563 fig 204722.5.peg.2465</p> <p>Nitric-oxide reductase subunit C (EC 1.7.99.7) fig 439375.7.peg.4562 fig 204722.5.peg.2464</p> <p>Nitrite reductase accessory protein NirV fig 439375.7.peg.4555 fig 204722.5.peg.2476</p> <p>Nitrous oxide reductase maturation periplasmic protein<br/>NosX fig 439375.7.peg.4515 fig 204722.5.peg.2497</p> <p>Nitrous oxide reductase maturation protein NosD fig 439375.7.peg.4519 fig 204722.5.peg.2493</p> <p>Nitrous oxide reductase maturation protein NosF (ATPase) fig 439375.7.peg.4518 fig 204722.5.peg.2494</p> <p>Nitrous oxide reductase maturation protein NosR fig 439375.7.peg.4521 fig 204722.5.peg.2491</p> <p>Nitrous oxide reductase maturation protein, outer-membrane lipoprotein NosL fig 439375.7.peg.4516 fig 204722.5.peg.2496</p> |

|                                                        |                                                        |                                                                                   |                                                                                          |
|--------------------------------------------------------|--------------------------------------------------------|-----------------------------------------------------------------------------------|------------------------------------------------------------------------------------------|
|                                                        |                                                        | Nitrous oxide reductase maturation transmembrane protein                          |                                                                                          |
|                                                        |                                                        | NosY                                                                              | fig 439375.7.peg.4517 fig 204722.5.peg.2495                                              |
|                                                        |                                                        | Nitrous-oxide reductase (EC 1.7.99.6)                                             | fig 439375.7.peg.4520 fig 204722.5.peg.2492                                              |
|                                                        |                                                        | NnrS protein involved in response to NO                                           | fig 439375.7.peg.3048 fig 204722.5.peg.2500                                              |
|                                                        | Nitrate and nitrite ammonification                     |                                                                                   | fig 439375.7.peg.3036,                                                                   |
|                                                        |                                                        | Nitrate/nitrite transporter                                                       | fig 439375.7.peg.3522 fig 204722.5.peg.2517                                              |
|                                                        |                                                        | Respiratory nitrate reductase alpha chain (EC 1.7.99.4)                           | fig 439375.7.peg.3037 fig 204722.5.peg.2516                                              |
|                                                        |                                                        | Respiratory nitrate reductase beta chain (EC 1.7.99.4)                            | fig 439375.7.peg.3038 fig 204722.5.peg.2515                                              |
|                                                        |                                                        | Respiratory nitrate reductase delta chain (EC 1.7.99.4)                           | fig 439375.7.peg.3039 fig 204722.5.peg.2514                                              |
|                                                        | Nitrosative stress                                     | Respiratory nitrate reductase gamma chain (EC 1.7.99.4)                           | fig 439375.7.peg.3040 fig 204722.5.peg.2513                                              |
|                                                        |                                                        | NnrS protein involved in response to NO                                           | fig 439375.7.peg.3048 fig 204722.5.peg.2500                                              |
| Detoxification                                         | Housecleaning nucleoside triphosphate pyrophosphatases | 5-nucleotidase SurE (EC 3.1.3.5)                                                  | fig 439375.7.peg.2471 fig 204722.5.peg.897                                               |
|                                                        |                                                        | Deoxyuridine 5&#39;-triphosphate nucleotidohydrolase (EC 3.6.1.23)                | fig 439375.7.peg.1323 fig 204722.5.peg.1702                                              |
|                                                        |                                                        | Nucleoside 5-triphosphatase RdgB (dHATP, dITP, XTP-specific) (EC 3.6.1.15)        | fig 439375.7.peg.195 fig 204722.5.peg.183                                                |
|                                                        | Nucleoside triphosphate pyrophosphatase                | Nucleoside triphosphate pyrophosphohydrolase MazG                                 | fig 439375.7.peg.2258 fig 204722.5.peg.1081                                              |
|                                                        | Nudix proteins (nucleoside triphosphate hydrolases)    | 5-methyl-dCTP pyrophosphohydrolase (EC 3.6.1.-)                                   | fig 439375.7.peg.1075 fig 204722.5.peg.1973                                              |
|                                                        |                                                        | ADP-ribose pyrophosphatase (EC 3.6.1.13)                                          | fig 439375.7.peg.4315                                                                    |
|                                                        |                                                        | Deoxyuridine 5&#39;-triphosphate nucleotidohydrolase (EC 3.6.1.23)                | fig 439375.7.peg.1323 fig 204722.5.peg.1702                                              |
|                                                        |                                                        | Hypothetical nudix hydrolase YeaB                                                 | fig 439375.7.peg.1698 fig 204722.5.peg.1582                                              |
|                                                        |                                                        | NADH pyrophosphatase (EC 3.6.1.22)                                                | fig 439375.7.peg.19 fig 204722.5.peg.40                                                  |
|                                                        |                                                        | Nudix hydrolase family protein PA3470                                             | fig 439375.7.peg.373 fig 204722.5.peg.294                                                |
|                                                        |                                                        | Aspartate carbamoyltransferase (EC 2.1.3.2)                                       | fig 439375.7.peg.3829 fig 204722.5.peg.2816                                              |
|                                                        | De Novo Pyrimidine Synthesis                           | Carbamoyl-phosphate synthase large chain (EC 6.3.5.5)                             | fig 439375.7.peg.1770 fig 204722.5.peg.1515                                              |
|                                                        |                                                        | Carbamoyl-phosphate synthase small chain (EC 6.3.5.5)                             | fig 439375.7.peg.1775 fig 204722.5.peg.1510                                              |
|                                                        |                                                        | Dihydroorotase (EC 3.5.2.3)                                                       | fig 439375.7.peg.2763, fig 204722.5.peg.680, fig 439375.7.peg.3830 fig 204722.5.peg.2817 |
|                                                        |                                                        | Dihydroorotate dehydrogenase (EC 1.3.3.1)                                         | fig 439375.7.peg.430 fig 204722.5.peg.324                                                |
| Orotate phosphoribosyltransferase (EC 2.4.2.10)        |                                                        | fig 439375.7.peg.2777 fig 204722.5.peg.666                                        |                                                                                          |
| Orotidine 5&#39;-phosphate decarboxylase (EC 4.1.1.23) |                                                        | fig 439375.7.peg.829 fig 204722.5.peg.2166                                        |                                                                                          |
| Uracil permease                                        |                                                        | fig 439375.7.peg.3004 fig 204722.5.peg.2659                                       |                                                                                          |
| Uracil phosphoribosyltransferase (EC 2.4.2.9)          |                                                        | fig 439375.7.peg.1376 fig 204722.5.peg.3291                                       |                                                                                          |
| Beta-ureidopropionase (EC 3.5.1.6)                     |                                                        | fig 439375.7.peg.371 fig 204722.5.peg.292                                         |                                                                                          |
| Hydantoin metabolism                                   |                                                        | Deacetylases, including yeast histone deacetylase and acetoin utilization protein | fig 439375.7.peg.578 fig 204722.5.peg.445                                                |
|                                                        | Dihydropyrimidinase (EC 3.5.2.2)                       | fig 439375.7.peg.370 fig 204722.5.peg.291                                         |                                                                                          |
|                                                        |                                                        | fig 439375.7.peg.1478,                                                            |                                                                                          |
|                                                        | Hydantoin racemase (EC 5.1.99.-)                       | fig 439375.7.peg.4596                                                             |                                                                                          |
|                                                        | N-methylhydantoinase A (EC 3.5.2.14)                   | fig 439375.7.peg.4751                                                             |                                                                                          |
|                                                        | N-methylhydantoinase B (EC 3.5.2.14)                   | fig 439375.7.peg.4752                                                             |                                                                                          |
| Nucleosides and Nucleotides                            | Purine Utilization                                     | Guanine deaminase (EC 3.5.4.3)                                                    | fig 439375.7.peg.485 fig 204722.5.peg.370                                                |
|                                                        |                                                        | Xanthine dehydrogenase, iron-sulfur cluster and FAD-binding subunit A (1.17.1.4)  | fig 439375.7.peg.480 fig 204722.5.peg.365                                                |
|                                                        |                                                        | Xanthine dehydrogenase, molybdenum binding subunit (EC 1.17.1.4)                  | fig 439375.7.peg.481 fig 204722.5.peg.366                                                |
|                                                        |                                                        | Xanthine permease                                                                 | fig 439375.7.peg.1013                                                                    |
|                                                        |                                                        |                                                                                   |                                                                                          |

Nucleosides and Nucleotides

Purines

|                             |                                                                                             |                       |                       |
|-----------------------------|---------------------------------------------------------------------------------------------|-----------------------|-----------------------|
| Ribonucleotide reduction    | Xanthine/uracil/thiamine/ascorbate permease family protein                                  | fig 439375.7.peg.3932 | fig 204722.5.peg.2874 |
|                             | XdhC protein (assists in molybdopterin insertion into xanthine dehydrogenase)               | fig 439375.7.peg.482  | fig 204722.5.peg.367  |
|                             | Glutaredoxin-like protein NrdH, required for reduction of Ribonucleotide reductase class Ib | fig 439375.7.peg.3102 | fig 204722.5.peg.2530 |
|                             | Ribonucleotide reductase of class Ib (aerobic), alpha subunit (EC 1.17.4.1)                 | fig 439375.7.peg.3104 | fig 204722.5.peg.2532 |
|                             | Ribonucleotide reductase of class Ib (aerobic), beta subunit (EC 1.17.4.1)                  | fig 439375.7.peg.3105 | fig 204722.5.peg.2533 |
|                             | Ribonucleotide reductase of class II (coenzyme B12-dependent) (EC 1.17.4.1)                 | fig 439375.7.peg.2238 | fig 204722.5.peg.1055 |
|                             | Ribonucleotide reductase transcriptional regulator NrdR                                     | fig 439375.7.peg.2663 | fig 204722.5.peg.777  |
| De Novo Purine Biosynthesis | Ribonucleotide reduction protein NrdI                                                       | fig 439375.7.peg.3103 | fig 204722.5.peg.2531 |
|                             | Adenylosuccinate lyase (EC 4.3.2.2)                                                         | fig 439375.7.peg.2507 | fig 204722.5.peg.859  |
|                             | Amidophosphoribosyltransferase (EC 2.4.2.14)                                                | fig 439375.7.peg.598  | fig 204722.5.peg.462  |
|                             | IMP cyclohydrolase (EC 3.5.4.10)                                                            | fig 439375.7.peg.1136 | fig 204722.5.peg.1847 |
|                             | Phosphoribosylamine--glycine ligase (EC 6.3.4.13)                                           | fig 439375.7.peg.566  | fig 204722.5.peg.430  |
|                             | Phosphoribosylaminoimidazole carboxylase ATPase subunit (EC 4.1.1.21)                       | fig 439375.7.peg.1218 | fig 204722.5.peg.1773 |
|                             | Phosphoribosylaminoimidazole carboxylase catalytic subunit (EC 4.1.1.21)                    | fig 439375.7.peg.1219 | fig 204722.5.peg.1772 |
|                             | Phosphoribosylaminoimidazolecarboxamide formyltransferase (EC 2.1.2.3)                      | fig 439375.7.peg.1136 | fig 204722.5.peg.1847 |
|                             | Phosphoribosylaminoimidazole-succinocarboxamide synthase (EC 6.3.2.6)                       | fig 439375.7.peg.2513 | fig 204722.5.peg.853  |
|                             | Phosphoribosylformylglycinamide cyclo-ligase (EC 6.3.3.1)                                   | fig 439375.7.peg.2714 | fig 204722.5.peg.723  |
|                             | Phosphoribosylformylglycinamide synthase, glutamine amidotransferase subunit (EC 6.3.5.3)   | fig 439375.7.peg.2515 | fig 204722.5.peg.851  |
|                             | Phosphoribosylformylglycinamide synthase, PurS subunit (EC 6.3.5.3)                         | fig 439375.7.peg.2514 | fig 204722.5.peg.852  |
|                             | Phosphoribosylformylglycinamide synthase, synthetase subunit (EC 6.3.5.3)                   | fig 439375.7.peg.2520 | fig 204722.5.peg.848  |
|                             | Phosphoribosylglycinamide formyltransferase (EC 2.1.2.2)                                    | fig 439375.7.peg.2715 | fig 204722.5.peg.722  |
|                             | Ribose-phosphate pyrophosphokinase (EC 2.7.6.1)                                             | fig 439375.7.peg.1722 | fig 204722.5.peg.1557 |
| Purine conversions          | Adenine deaminase (EC 3.5.4.2)                                                              | fig 439375.7.peg.3899 | fig 204722.5.peg.2866 |
|                             | Adenine phosphoribosyltransferase (EC 2.4.2.7)                                              | fig 439375.7.peg.1714 | fig 204722.5.peg.1564 |
|                             | Adenylate kinase (EC 2.7.4.3)                                                               | fig 439375.7.peg.2079 | fig 204722.5.peg.1234 |
|                             | Adenylosuccinate lyase (EC 4.3.2.2)                                                         | fig 439375.7.peg.2507 | fig 204722.5.peg.859  |
|                             | Adenylosuccinate synthetase (EC 6.3.4.4)                                                    | fig 439375.7.peg.1288 | fig 204722.5.peg.1710 |
|                             | AMP nucleosidase (EC 3.2.2.4)                                                               | fig 439375.7.peg.2801 | fig 204722.5.peg.641  |
|                             | Deoxyguanosinetriphosphate triphosphohydrolase (EC 3.1.5.1)                                 | fig 439375.7.peg.2482 | fig 204722.5.peg.887  |
|                             | GMP synthase [glutamine-hydrolyzing] (EC 6.3.5.2)                                           | fig 439375.7.peg.3209 | fig 204722.5.peg.2575 |
|                             | Guanine deaminase (EC 3.5.4.3)                                                              | fig 439375.7.peg.485  | fig 204722.5.peg.370  |
|                             | Guanylate kinase (EC 2.7.4.8)                                                               | fig 439375.7.peg.615, | fig 204722.5.peg.479, |
|                             | Hypoxanthine-guanine phosphoribosyltransferase (EC 2.4.2.8)                                 | fig 439375.7.peg.2298 | fig 204722.5.peg.1120 |
|                             |                                                                                             | fig 439375.7.peg.1043 | fig 204722.5.peg.2022 |

|                                          |                                          |                                                              |                                                                                               |                                                                     |                                                              |                     |
|------------------------------------------|------------------------------------------|--------------------------------------------------------------|-----------------------------------------------------------------------------------------------|---------------------------------------------------------------------|--------------------------------------------------------------|---------------------|
| Phages, Prophages, Transposable elements | Pyrimidines                              |                                                              | Inosine-5&#39;-monophosphate dehydrogenase (EC 1.1.1.205)                                     | fig 439375.7.p.2040, fig 439375.7.p.3203, fig 439375.7.p.2900,      | fig 204722.5.p.1275, fig 204722.5.p.2566                     |                     |
|                                          |                                          |                                                              | Inosine-uridine preferring nucleoside hydrolase (EC 3.2.2.1)                                  | fig 439375.7.p.4623                                                 | fig 204722.5.p.2228                                          |                     |
|                                          |                                          |                                                              | Nucleoside diphosphate kinase (EC 2.7.4.6)                                                    | fig 439375.7.p.2734                                                 | fig 204722.5.p.706                                           |                     |
|                                          |                                          |                                                              | Polyphosphate kinase (EC 2.7.4.1)                                                             | fig 439375.7.p.2679                                                 | fig 204722.5.p.762                                           |                     |
|                                          |                                          |                                                              | Xanthine-guanine phosphoribosyltransferase (EC 2.4.2.22)                                      | fig 439375.7.p.2240                                                 | fig 204722.5.p.1059                                          |                     |
|                                          |                                          | pyrimidine conversions                                       |                                                                                               | Bis(5&#39;-nucleosyl)-tetraphosphatase (asymmetrical) (EC 3.6.1.17) | fig 439375.7.p.2128                                          | fig 204722.5.p.1187 |
|                                          |                                          |                                                              |                                                                                               | CTP synthase (EC 6.3.4.2)                                           | fig 439375.7.p.2160                                          | fig 204722.5.p.1154 |
|                                          |                                          |                                                              |                                                                                               | Cytidylate kinase (EC 2.7.4.14)                                     | fig 439375.7.p.31                                            | fig 204722.5.p.29   |
|                                          |                                          |                                                              |                                                                                               |                                                                     | fig 439375.7.p.3466, fig 439375.7.p.4040                     |                     |
|                                          |                                          |                                                              |                                                                                               | Cytosine deaminase (EC 3.5.4.1)                                     | fig 439375.7.p.425                                           | fig 204722.5.p.319  |
|                                          |                                          |                                                              | Deoxycytidine triphosphate deaminase (EC 3.5.4.13)                                            | fig 439375.7.p.2734                                                 | fig 204722.5.p.706                                           |                     |
|                                          |                                          |                                                              | Nucleoside diphosphate kinase (EC 2.7.4.6)                                                    | fig 439375.7.p.1754, fig 439375.7.p.2219,                           | fig 204722.5.p.1039,                                         |                     |
|                                          |                                          |                                                              | Thioredoxin reductase (EC 1.8.1.9)                                                            | fig 439375.7.p.3745                                                 | fig 204722.5.p.1525                                          |                     |
|                                          |                                          |                                                              |                                                                                               | fig 439375.7.p.902, fig 439375.7.p.2183                             | fig 204722.5.p.1004, fig 204722.5.p.2097                     |                     |
|                                          |                                          |                                                              | Thymidylate kinase (EC 2.7.4.9)                                                               | fig 439375.7.p.1893                                                 | fig 204722.5.p.1424                                          |                     |
|                                          |                                          | Thymidylate synthase (EC 2.1.1.45)                           | fig 439375.7.p.1376                                                                           | fig 204722.5.p.3291                                                 |                                                              |                     |
|                                          |                                          | Uracil phosphoribosyltransferase (EC 2.4.2.9)                |                                                                                               |                                                                     |                                                              |                     |
|                                          | Pyrimidine utilization                   |                                                              | Beta-ureidopropionase (EC 3.5.1.6)                                                            | fig 439375.7.p.371                                                  | fig 204722.5.p.292                                           |                     |
|                                          |                                          |                                                              | Dihydropyrimidinase (EC 3.5.2.2)                                                              | fig 439375.7.p.370                                                  | fig 204722.5.p.291                                           |                     |
|                                          |                                          |                                                              | Dihydropyrimidine dehydrogenase [NADP+] (EC 1.3.1.2)                                          | fig 439375.7.p.388                                                  | fig 204722.5.p.295                                           |                     |
|                                          |                                          |                                                              | Pyridine nucleotide-disulphide oxidoreductase associated with reductive pyrimidine catabolism | fig 439375.7.p.389                                                  | fig 204722.5.p.296                                           |                     |
|                                          |                                          |                                                              |                                                                                               | fig 439375.7.p.369,                                                 |                                                              |                     |
|                                          |                                          |                                                              | Pyrimidine ABC transporter, ATP-binding protein                                               | fig 439375.7.p.3129                                                 |                                                              |                     |
|                                          |                                          |                                                              | Pyrimidine ABC transporter, substrate-binding component                                       | fig 439375.7.p.366                                                  |                                                              |                     |
|                                          |                                          |                                                              | Pyrimidine ABC transporter, transmembrane component 1                                         | fig 439375.7.p.368                                                  |                                                              |                     |
|                                          |                                          |                                                              | Pyrimidine ABC transporter, transmembrane component 2                                         | fig 439375.7.p.367                                                  |                                                              |                     |
|                                          |                                          |                                                              | Transcriptional regulator RutR of pyrimidine catabolism (TetR family)                         | fig 439375.7.p.372                                                  | fig 204722.5.p.293                                           |                     |
|                                          | Uracil permease                          | fig 439375.7.p.3004                                          | fig 204722.5.p.2659                                                                           |                                                                     |                                                              |                     |
| Phages, Prophages, Transposable elements | Bacteriophage structural proteins        | Phage capsid proteins                                        | Phage capsid and scaffold                                                                     | fig 439375.7.p.256                                                  |                                                              |                     |
|                                          |                                          | Phage capsid proteins                                        | Phage major capsid protein                                                                    |                                                                     | fig 204722.5.p.605                                           |                     |
|                                          |                                          | Phage tail fiber proteins                                    | Phage tail fibers                                                                             |                                                                     | fig 204722.5.p.2388                                          |                     |
|                                          | Phages, Prophages, Transposable elements | Phage packaging machinery                                    |                                                                                               |                                                                     | fig 439375.7.p.260, fig 439375.7.p.1577, fig 439375.7.p.2433 | fig 204722.5.p.602  |
|                                          |                                          |                                                              |                                                                                               | Phage portal protein                                                | fig 439375.7.p.254                                           |                     |
|                                          |                                          |                                                              |                                                                                               | Phage terminase large subunit                                       | fig 439375.7.p.1881, fig 439375.7.p.2435                     |                     |
|                                          |                                          | Phage terminase, large subunit                               | fig 439375.7.p.2435                                                                           |                                                                     |                                                              |                     |
|                                          |                                          | Alkylphosphonate utilization operon protein PhnA             | fig 439375.7.p.1805                                                                           | fig 204722.5.p.1490                                                 |                                                              |                     |
|                                          |                                          | ATP-binding protein PhnN                                     | fig 439375.7.p.2298                                                                           | fig 204722.5.p.1120                                                 |                                                              |                     |
|                                          |                                          | Metal-dependent hydrolase involved in phosphonate metabolism | fig 439375.7.p.2299, fig 439375.7.p.2496                                                      | fig 204722.5.p.871                                                  |                                                              |                     |

Phosphorus Metabolism

Phosphorus Metabolism

|                                                                |                                                                                                 |                                                                          |                                                                            |
|----------------------------------------------------------------|-------------------------------------------------------------------------------------------------|--------------------------------------------------------------------------|----------------------------------------------------------------------------|
| Alkylphosphonate utilization                                   | PhnB protein                                                                                    | fig 439375.7.peg.1649                                                    |                                                                            |
|                                                                | PhnG protein                                                                                    | fig 439375.7.peg.2306                                                    |                                                                            |
|                                                                | PhnH protein                                                                                    | fig 439375.7.peg.2305                                                    |                                                                            |
|                                                                | PhnI protein                                                                                    | fig 439375.7.peg.2304                                                    |                                                                            |
|                                                                | PhnJ protein                                                                                    | fig 439375.7.peg.2303                                                    |                                                                            |
|                                                                | Phosphonates transport ATP-binding protein PhnK                                                 | fig 439375.7.peg.2302                                                    |                                                                            |
|                                                                | Phosphonates transport ATP-binding protein PhnL                                                 | fig 439375.7.peg.2301                                                    |                                                                            |
|                                                                | Protein RcsF                                                                                    | fig 439375.7.peg.2497                                                    | fig 204722.5.peg.870                                                       |
|                                                                | Transcriptional regulator PhnF                                                                  | fig 439375.7.peg.2307                                                    | fig 204722.5.peg.1121                                                      |
| High affinity phosphate transporter and control of PHO regulon | Phosphate ABC transporter, periplasmic phosphate-binding protein PstS (TC 3.A.1.7.1)            | fig 439375.7.peg.815                                                     | fig 204722.5.peg.2175                                                      |
|                                                                | Phosphate regulon sensor protein PhoR (SphS) (EC 2.7.13.3)                                      | fig 439375.7.peg.405                                                     | fig 204722.5.peg.312                                                       |
|                                                                | Phosphate regulon transcriptional regulatory protein PhoB (SphR)                                | fig 439375.7.peg.810                                                     | fig 204722.5.peg.2180                                                      |
|                                                                | Phosphate transport ATP-binding protein PstB (TC 3.A.1.7.1)                                     | fig 439375.7.peg.812                                                     | fig 204722.5.peg.2178                                                      |
|                                                                | Phosphate transport system permease protein PstA (TC 3.A.1.7.1)                                 | fig 439375.7.peg.813                                                     | fig 204722.5.peg.2177                                                      |
|                                                                | Phosphate transport system permease protein PstC (TC 3.A.1.7.1)                                 | fig 439375.7.peg.814                                                     | fig 204722.5.peg.2176                                                      |
|                                                                | Phosphate transport system regulatory protein PhoU                                              | fig 439375.7.peg.811                                                     | fig 204722.5.peg.2179                                                      |
|                                                                | Polyphosphate kinase (EC 2.7.4.1)                                                               | fig 439375.7.peg.2679                                                    | fig 204722.5.peg.762                                                       |
| Phosphate metabolism                                           | 1-acyl-sn-glycerol-3-phosphate acyltransferase (EC 2.3.1.51)                                    | fig 439375.7.peg.802,<br>fig 439375.7.peg.1035,<br>fig 439375.7.peg.3032 | fig 204722.5.peg.2032,<br>fig 204722.5.peg.2189,<br>fig 204722.5.peg.1221, |
|                                                                | Alkaline phosphatase (EC 3.1.3.1)                                                               | fig 439375.7.peg.2926                                                    | fig 204722.5.peg.2832                                                      |
|                                                                | Alkaline phosphatase like protein                                                               |                                                                          | fig 204722.5.peg.447                                                       |
|                                                                | Apolipoprotein N-acyltransferase (EC 2.3.1.-)                                                   | fig 439375.7.peg.796                                                     | fig 204722.5.peg.2195                                                      |
|                                                                | Exopolyphosphatase (EC 3.6.1.11)                                                                | fig 439375.7.peg.2678,<br>fig 439375.7.peg.3976                          | fig 204722.5.peg.763,<br>fig 204722.5.peg.2896                             |
|                                                                | FIG000233: metal-dependent hydrolase                                                            | fig 439375.7.peg.798                                                     | fig 204722.5.peg.2193                                                      |
|                                                                | Inorganic pyrophosphatase (EC 3.6.1.1)                                                          | fig 439375.7.peg.1036,<br>fig 439375.7.peg.1290                          | fig 204722.5.peg.2030                                                      |
|                                                                | Integral membrane protein YggT, involved in response to extracytoplasmic stress (osmotic shock) | fig 439375.7.peg.1037                                                    | fig 204722.5.peg.2029                                                      |
|                                                                | Magnesium and cobalt efflux protein CorC                                                        | fig 439375.7.peg.797                                                     | fig 204722.5.peg.2194                                                      |
|                                                                | NAD(P) transhydrogenase alpha subunit (EC 1.6.1.2)                                              | fig 439375.7.peg.1452,<br>fig 439375.7.peg.1453                          | fig 204722.5.peg.3194,<br>fig 204722.5.peg.3195                            |
|                                                                | NAD(P) transhydrogenase subunit beta (EC 1.6.1.2)                                               | fig 439375.7.peg.1454                                                    | fig 204722.5.peg.3193                                                      |
|                                                                | Phosphate ABC transporter, periplasmic phosphate-binding protein PstS (TC 3.A.1.7.1)            | fig 439375.7.peg.815                                                     | fig 204722.5.peg.2175                                                      |
|                                                                | Phosphate regulon sensor protein PhoR (SphS) (EC 2.7.13.3)                                      | fig 439375.7.peg.405                                                     | fig 204722.5.peg.312                                                       |
|                                                                | Phosphate regulon transcriptional regulatory protein PhoB (SphR)                                | fig 439375.7.peg.810                                                     | fig 204722.5.peg.2180                                                      |
|                                                                | Phosphate starvation-inducible ATPase PhoH with RNA binding motif                               | fig 439375.7.peg.799                                                     | fig 204722.5.peg.2192                                                      |

|  |                             |                                                                                                                     |
|--|-----------------------------|---------------------------------------------------------------------------------------------------------------------|
|  |                             | Phosphate transport ATP-binding protein PstB (TC 3.A.1.7.1) fig 439375.7.p.812 fig 204722.5.p.2178                  |
|  |                             | Phosphate transport system permease protein PstA (TC 3.A.1.7.1) fig 439375.7.p.813 fig 204722.5.p.2177              |
|  |                             | Phosphate transport system permease protein PstC (TC 3.A.1.7.1) fig 439375.7.p.814 fig 204722.5.p.2176              |
|  |                             | Phosphate transport system regulatory protein PhoU fig 439375.7.p.811 fig 204722.5.p.2179                           |
|  |                             | Polyphosphate kinase (EC 2.7.4.1) fig 439375.7.p.2679 fig 204722.5.p.762                                            |
|  |                             | Pyrophosphate-energized proton pump (EC 3.6.1.1) fig 439375.7.p.2657 fig 204722.5.p.782                             |
|  |                             | Sodium-dependent phosphate transporter fig 439375.7.p.1777 fig 204722.5.p.1508                                      |
|  | <b>Potassium metabolism</b> | Glutathione-regulated potassium-efflux system and associated functions fig 439375.7.p.4335, fig 439375.7.p.4657     |
|  |                             | Glutathione-regulated potassium-efflux system protein KefB fig 439375.7.p.2322 fig 204722.5.p.1134                  |
|  |                             | Trk system potassium uptake protein TrkA fig 439375.7.p.987 fig 204722.5.p.1950                                     |
|  |                             | 16S rRNA processing protein RimM fig 439375.7.p.2747 fig 204722.5.p.694                                             |
|  |                             | Dimethyladenosine transferase (EC 2.1.1.-) fig 439375.7.p.804 fig 204722.5.p.2187                                   |
|  |                             | Inactive homolog of metal-dependent proteases, putative molecular chaperone fig 439375.7.p.1108 fig 204722.5.p.1872 |
|  |                             | LSU m3Psi1915 methyltransferase RlmH fig 439375.7.p.1095                                                            |
|  |                             | Ribosomal large subunit pseudouridine synthase A (EC 4.2.1.70) fig 439375.7.p.2189 fig 204722.5.p.1011              |
|  |                             | Ribosomal large subunit pseudouridine synthase C (EC 4.2.1.70) fig 439375.7.p.1294 fig 204722.5.p.1678              |
|  |                             | Ribosomal large subunit pseudouridine synthase D (EC 4.2.1.70) fig 439375.7.p.1860 fig 204722.5.p.1443              |
|  |                             | Ribosomal protein L11 methyltransferase (EC 2.1.1.-) fig 439375.7.p.819                                             |
|  |                             | Ribosomal protein S6 glutaminyl transferase fig 439375.7.p.803 fig 204722.5.p.2188                                  |
|  |                             | Ribosomal-protein-S18p-alanine acetyltransferase (EC 2.3.1.-) fig 439375.7.p.637 fig 204722.5.p.497                 |
|  |                             | Ribosomal-protein-S5p-alanine acetyltransferase fig 439375.7.p.988 fig 204722.5.p.1949                              |
|  |                             | tRNA (Guanine37-N1) -methyltransferase (EC 2.1.1.31) fig 439375.7.p.2048 fig 204722.5.p.1267                        |
|  |                             | LSU ribosomal protein L10p (P0) fig 439375.7.p.2046 fig 204722.5.p.1269                                             |
|  |                             | LSU ribosomal protein L11p (L12e) fig 439375.7.p.2628 fig 204722.5.p.802                                            |
|  |                             | LSU ribosomal protein L13p (L13Ae) fig 439375.7.p.2068 fig 204722.5.p.1245                                          |
|  |                             | LSU ribosomal protein L14p (L23e) fig 439375.7.p.2077 fig 204722.5.p.1236                                           |
|  |                             | LSU ribosomal protein L15p (L27Ae) fig 439375.7.p.2065 fig 204722.5.p.1248                                          |
|  |                             | LSU ribosomal protein L16p (L10e) fig 439375.7.p.2083 fig 204722.5.p.1229                                           |
|  |                             | LSU ribosomal protein L17p fig 439375.7.p.2074 fig 204722.5.p.1239                                                  |
|  |                             | LSU ribosomal protein L18p (L5e) fig 439375.7.p.990 fig 204722.5.p.1942                                             |
|  |                             | LSU ribosomal protein L19p fig 439375.7.p.2047 fig 204722.5.p.1268                                                  |
|  |                             | LSU ribosomal protein L1p (L10Ae) fig 439375.7.p.844 fig 204722.5.p.2158                                            |
|  |                             | LSU ribosomal protein L20p fig 439375.7.p.1098 fig 204722.5.p.1883                                                  |
|  |                             | LSU ribosomal protein L21p fig 439375.7.p.2063 fig 204722.5.p.1250                                                  |
|  |                             | LSU ribosomal protein L22p (L17e) fig 439375.7.p.2060 fig 204722.5.p.1253                                           |
|  |                             | LSU ribosomal protein L23p (L23Ae) fig 439375.7.p.2069 fig 204722.5.p.1244                                          |
|  |                             | LSU ribosomal protein L24p (L26e) fig 439375.7.p.1719 fig 204722.5.p.1559                                           |
|  |                             | LSU ribosomal protein L25p fig 439375.7.p.1099 fig 204722.5.p.1882                                                  |
|  |                             | LSU ribosomal protein L27p fig 439375.7.p.962 fig 204722.5.p.2050                                                   |
|  |                             | LSU ribosomal protein L28p fig 439375.7.p.2066 fig 204722.5.p.1247                                                  |
|  |                             | LSU ribosomal protein L29p (L35e)                                                                                   |

**Protein biosynthesis**

|                                          |                                                                         |                                              |                                              |
|------------------------------------------|-------------------------------------------------------------------------|----------------------------------------------|----------------------------------------------|
|                                          | LSU ribosomal protein L2p (L8e)                                         | fig 439375.7.peg.2061                        | fig 204722.5.peg.1252                        |
|                                          | LSU ribosomal protein L30p (L7e)                                        | fig 439375.7.peg.2076                        | fig 204722.5.peg.1237                        |
|                                          | LSU ribosomal protein L31p                                              | fig 439375.7.peg.1254                        | fig 204722.5.peg.1742                        |
|                                          | LSU ribosomal protein L32p                                              | fig 439375.7.peg.1178                        | fig 204722.5.peg.1802                        |
|                                          | LSU ribosomal protein L33p                                              | fig 439375.7.peg.3840                        | fig 204722.5.peg.2826                        |
|                                          | LSU ribosomal protein L34p                                              | fig 439375.7.peg.1429                        | fig 204722.5.peg.3246                        |
|                                          | LSU ribosomal protein L35p                                              | fig 439375.7.peg.845                         | fig 204722.5.peg.2157                        |
|                                          | LSU ribosomal protein L36p                                              | fig 439375.7.peg.1217                        | fig 204722.5.peg.1774                        |
|                                          | LSU ribosomal protein L3p (L3e)                                         | fig 439375.7.peg.2058                        | fig 204722.5.peg.1255                        |
|                                          | LSU ribosomal protein L4p (L1e)                                         | fig 439375.7.peg.2059                        | fig 204722.5.peg.1254                        |
|                                          | LSU ribosomal protein L5p (L11e)                                        | fig 439375.7.peg.2070                        | fig 204722.5.peg.1243                        |
|                                          | LSU ribosomal protein L6p (L9e)                                         | fig 439375.7.peg.2073                        | fig 204722.5.peg.1240                        |
|                                          | LSU ribosomal protein L7/L12 (P1/P2)                                    | fig 439375.7.peg.2049                        | fig 204722.5.peg.1266                        |
|                                          | LSU ribosomal protein L9p                                               | fig 439375.7.peg.605                         | fig 204722.5.peg.467                         |
| Ribosome SSU bacterial                   | SSU ribosomal protein S10p (S20e)                                       | fig 439375.7.peg.2057                        | fig 204722.5.peg.1256                        |
|                                          | SSU ribosomal protein S11p (S14e)                                       | fig 439375.7.peg.2081                        | fig 204722.5.peg.1232                        |
|                                          | SSU ribosomal protein S12p (S23e)                                       | fig 439375.7.peg.2053                        | fig 204722.5.peg.1260                        |
|                                          | SSU ribosomal protein S13p (S18e)                                       | fig 439375.7.peg.2080                        | fig 204722.5.peg.1233                        |
|                                          | SSU ribosomal protein S14p (S29e)                                       | fig 439375.7.peg.2071                        | fig 204722.5.peg.1242                        |
|                                          | SSU ribosomal protein S15p (S13e)                                       | fig 439375.7.peg.786                         | fig 204722.5.peg.2205                        |
|                                          | SSU ribosomal protein S16p                                              | fig 439375.7.peg.1128                        | fig 204722.5.peg.1854                        |
|                                          | SSU ribosomal protein S17p (S11e)                                       | fig 439375.7.peg.2067                        | fig 204722.5.peg.1246                        |
|                                          | SSU ribosomal protein S18p                                              | fig 439375.7.peg.607                         | fig 204722.5.peg.469                         |
|                                          | SSU ribosomal protein S19p (S15e)                                       | fig 439375.7.peg.2062                        | fig 204722.5.peg.1251                        |
|                                          | SSU ribosomal protein S1p                                               | fig 439375.7.peg.30                          | fig 204722.5.peg.31                          |
|                                          | SSU ribosomal protein S20p                                              | fig 439375.7.peg.2                           | fig 204722.5.peg.2222                        |
|                                          | SSU ribosomal protein S21p                                              | fig 439375.7.peg.1459                        | fig 204722.5.peg.3188                        |
|                                          | SSU ribosomal protein S2p (SAe)                                         | fig 439375.7.peg.2133                        | fig 204722.5.peg.1181                        |
|                                          | SSU ribosomal protein S3p (S3e)                                         | fig 439375.7.peg.2064                        | fig 204722.5.peg.1249                        |
|                                          | SSU ribosomal protein S4p (S9e)                                         | fig 439375.7.peg.2526                        | fig 204722.5.peg.842                         |
|                                          | SSU ribosomal protein S5p (S2e)                                         | fig 439375.7.peg.2075                        | fig 204722.5.peg.1238                        |
|                                          | SSU ribosomal protein S6p                                               | fig 439375.7.peg.608                         | fig 204722.5.peg.470                         |
|                                          | SSU ribosomal protein S7p (S5e)                                         | fig 439375.7.peg.2054                        | fig 204722.5.peg.1259                        |
|                                          | SSU ribosomal protein S8p (S15Ae)                                       | fig 439375.7.peg.2072                        | fig 204722.5.peg.1241                        |
| SSU ribosomal protein S9p (S16e)         | fig 439375.7.peg.2629                                                   | fig 204722.5.peg.801                         |                                              |
| Translation elongation factors bacterial | Translation elongation factor G                                         | fig 439375.7.peg.2055                        | fig 204722.5.peg.1258                        |
|                                          | Translation elongation factor LepA                                      | fig 439375.7.peg.1406                        | fig 204722.5.peg.3264                        |
|                                          | Translation elongation factor P                                         | fig 439375.7.peg.1260                        | fig 204722.5.peg.1736                        |
|                                          | Translation elongation factor Ts                                        | fig 439375.7.peg.2134                        | fig 204722.5.peg.1180                        |
|                                          | Translation elongation factor Tu                                        | fig 439375.7.peg.2043, fig 439375.7.peg.2056 | fig 204722.5.peg.1257, fig 204722.5.peg.1272 |
| Translation initiation factors bacterial | Methionyl-tRNA formyltransferase (EC 2.1.1.2.9)                         | fig 439375.7.peg.1410                        | fig 204722.5.peg.3259                        |
|                                          | Ribosome-binding factor A                                               | fig 439375.7.peg.788                         | fig 204722.5.peg.2203                        |
|                                          | Translation initiation factor 1                                         | fig 439375.7.peg.345                         | fig 204722.5.peg.258                         |
|                                          | Translation initiation factor 2                                         | fig 439375.7.peg.789                         | fig 204722.5.peg.2202                        |
|                                          | Translation initiation factor 3                                         | fig 439375.7.peg.847                         | fig 204722.5.peg.2155                        |
|                                          | Hypothetical protein YaeJ with similarity to translation release factor | fig 439375.7.peg.875                         | fig 204722.5.peg.2125                        |

Protein Metabolism

|                                              |                                                            |                                               |                        |
|----------------------------------------------|------------------------------------------------------------|-----------------------------------------------|------------------------|
| Translation termination factors<br>bacterial | Methionine aminopeptidase (EC 3.4.11.18)                   | fig 439375.7.peg.87,<br>fig 439375.7.peg.2010 | fig 204722.5.peg.1304  |
|                                              | Peptide chain release factor 1                             | fig 439375.7.peg.1086                         | fig 204722.5.peg.1904  |
|                                              | Peptide chain release factor 2                             | fig 439375.7.peg.2383                         | fig 204722.5.peg.932   |
|                                              | Peptide chain release factor 3                             | fig 439375.7.peg.1381                         | fig 204722.5.peg.3287  |
|                                              |                                                            | fig 439375.7.peg.1409,                        | fig 204722.5.peg.2672, |
|                                              | Peptide deformylase (EC 3.5.1.88)                          | fig 439375.7.peg.3255                         | fig 204722.5.peg.3260  |
|                                              | Peptidyl-tRNA hydrolase (EC 3.1.1.29)                      | fig 439375.7.peg.1718                         | fig 204722.5.peg.1560  |
|                                              | Ribosome recycling factor                                  | fig 439375.7.peg.2137                         | fig 204722.5.peg.1178  |
|                                              | tmRNA-binding protein SmpB                                 | fig 439375.7.peg.2782                         | fig 204722.5.peg.661   |
| tRNA aminoacylation, Ala                     | Alanyl-tRNA synthetase (EC 6.1.1.7)                        | fig 439375.7.peg.2089                         | fig 204722.5.peg.1222  |
| tRNA aminoacylation, Ala                     | Alanyl-tRNA synthetase domain protein                      | fig 439375.7.peg.2249                         | fig 204722.5.peg.1068  |
| tRNA aminoacylation, Arg                     | Arginyl-tRNA synthetase (EC 6.1.1.19)                      | fig 439375.7.peg.2481                         | fig 204722.5.peg.888   |
| tRNA aminoacylation, Asp and Asn             | Aspartyl-tRNA synthetase (EC 6.1.1.12)                     | fig 439375.7.peg.2675                         | fig 204722.5.peg.765   |
| tRNA aminoacylation, Asp and Asn             | Aspartyl-tRNA(Asn) amidotransferase subunit A (EC 6.3.5.6) | fig 439375.7.peg.3822                         | fig 204722.5.peg.2810  |
| tRNA aminoacylation, Asp and Asn             | Aspartyl-tRNA(Asn) amidotransferase subunit B (EC 6.3.5.6) | fig 439375.7.peg.2399                         | fig 204722.5.peg.913   |
| tRNA aminoacylation, Asp and Asn             | Aspartyl-tRNA(Asn) amidotransferase subunit C (EC 6.3.5.6) | fig 439375.7.peg.3824                         | fig 204722.5.peg.2811  |
| tRNA aminoacylation, Asp and Asn             | Aspartyl-tRNA(Asn) synthetase (EC 6.1.1.23)                | fig 439375.7.peg.2675                         | fig 204722.5.peg.765   |
| tRNA aminoacylation, Cys                     | Cysteinyl-tRNA synthetase (EC 6.1.1.16)                    | fig 439375.7.peg.2753                         | fig 204722.5.peg.689   |
| tRNA aminoacylation, Glu and Gln             | Glutamyl-tRNA synthetase (EC 6.1.1.17)                     | fig 439375.7.peg.2148                         | fig 204722.5.peg.1167  |
|                                              | Glutamyl-tRNA(Gln) amidotransferase subunit A (EC 6.3.5.7) | fig 439375.7.peg.3822                         | fig 204722.5.peg.2810  |
| tRNA aminoacylation, Glu and Gln             | Glutamyl-tRNA(Gln) amidotransferase subunit B (EC 6.3.5.7) | fig 439375.7.peg.2399                         | fig 204722.5.peg.913   |
|                                              | Glutamyl-tRNA(Gln) amidotransferase subunit C (EC 6.3.5.7) | fig 439375.7.peg.3824                         | fig 204722.5.peg.2811  |
| tRNA aminoacylation, Glu and Gln             | Glutamyl-tRNA(Gln) synthetase (EC 6.1.1.24)                | fig 439375.7.peg.2204                         | fig 204722.5.peg.1027  |
| tRNA aminoacylation, Gly                     | Glycyl-tRNA synthetase alpha chain (EC 6.1.1.14)           | fig 439375.7.peg.557                          | fig 204722.5.peg.418   |
| tRNA aminoacylation, Gly                     | Glycyl-tRNA synthetase beta chain (EC 6.1.1.14)            | fig 439375.7.peg.558                          | fig 204722.5.peg.420   |
| tRNA aminoacylation, His                     | Histidyl-tRNA synthetase (EC 6.1.1.21)                     | fig 439375.7.peg.3169                         | fig 204722.5.peg.2403  |
| tRNA aminoacylation, Ile                     | Isoleucyl-tRNA synthetase (EC 6.1.1.5)                     | fig 439375.7.peg.3183                         | fig 204722.5.peg.2416  |
| tRNA aminoacylation, Leu                     | Leucyl-tRNA synthetase (EC 6.1.1.4)                        | fig 439375.7.peg.1145                         | fig 204722.5.peg.1835  |
| tRNA aminoacylation, Lys                     | Lysyl-tRNA synthetase (class I) (EC 6.1.1.6)               | fig 439375.7.peg.4144                         | fig 204722.5.peg.3005  |
| tRNA aminoacylation, Met                     | Methionyl-tRNA synthetase (EC 6.1.1.10)                    | fig 439375.7.peg.2185                         | fig 204722.5.peg.1007  |
| tRNA aminoacylation, Phe                     | Phenylalanyl-tRNA synthetase alpha chain (EC 6.1.1.20)     | fig 439375.7.peg.842                          | fig 204722.5.peg.2160  |
| tRNA aminoacylation, Phe                     | Phenylalanyl-tRNA synthetase beta chain (EC 6.1.1.20)      | fig 439375.7.peg.841                          | fig 204722.5.peg.2161  |
| tRNA aminoacylation, Pro                     | Prolyl-tRNA synthetase (EC 6.1.1.15)                       | fig 439375.7.peg.2537                         | fig 204722.5.peg.833   |
| tRNA aminoacylation, Ser                     | Archaeal seryl-tRNA synthetase-related sequence            | fig 439375.7.peg.1546                         |                        |
| tRNA aminoacylation, Ser                     | Seryl-tRNA synthetase (EC 6.1.1.11)                        | fig 439375.7.peg.2472                         | fig 204722.5.peg.896   |
| tRNA aminoacylation, Thr                     | Threonyl-tRNA synthetase (EC 6.1.1.3)                      | fig 439375.7.peg.2262                         | fig 204722.5.peg.1085  |
| tRNA aminoacylation, Trp                     | Tryptophanyl-tRNA synthetase (EC 6.1.1.2)                  | fig 439375.7.peg.164                          | fig 204722.5.peg.148   |
| tRNA aminoacylation, Tyr                     | Tyrosyl-tRNA synthetase (EC 6.1.1.1)                       | fig 439375.7.peg.2378                         | fig 204722.5.peg.941   |
| tRNA aminoacylation, Val                     | Valyl-tRNA synthetase (EC 6.1.1.9)                         | fig 439375.7.peg.2357                         | fig 204722.5.peg.961   |
|                                              | tRNA-Ala-CGC                                               |                                               | fig 204722.5.rna.48    |
|                                              | tRNA-Ala-GGC                                               | fig 439375.7.rna.1                            | fig 204722.5.rna.1     |
|                                              | tRNA-Arg-ACG                                               | fig 439375.7.rna.5                            | fig 204722.5.rna.5     |
|                                              | tRNA-Arg-CCG                                               | fig 439375.7.rna.37                           | fig 204722.5.rna.16    |
|                                              | tRNA-Cys-GCA                                               | fig 439375.7.rna.60                           | fig 204722.5.rna.54    |
|                                              | tRNA-Gly-CCC                                               | fig 439375.7.rna.34                           | fig 204722.5.rna.17    |

|                                                |                                                                                   |                                                 |                                                 |
|------------------------------------------------|-----------------------------------------------------------------------------------|-------------------------------------------------|-------------------------------------------------|
| tRNAs                                          | tRNA-Gly-GCC                                                                      | fig 439375.7.rna.23,<br>fig 439375.7.rna.57     | fig 204722.5.rna.57,<br>fig 204722.5.rna.58     |
|                                                | tRNA-Leu-CAA                                                                      | fig 439375.7.rna.8                              | fig 204722.5.rna.47                             |
|                                                | tRNA-Leu-CAG                                                                      | fig 439375.7.rna.25                             | fig 204722.5.rna.59                             |
|                                                |                                                                                   |                                                 | fig 204722.5.rna.19,<br>fig 204722.5.rna.20     |
|                                                | tRNA-Leu-GAG                                                                      | fig 439375.7.rna.36                             | fig 204722.5.rna.20                             |
|                                                | tRNA-Phe-GAA                                                                      | fig 439375.7.rna.3                              | fig 204722.5.rna.3                              |
|                                                | tRNA-Pro-CGG                                                                      | fig 439375.7.rna.2                              | fig 204722.5.rna.2                              |
|                                                | tRNA-Pro-GGG                                                                      | fig 439375.7.rna.45                             | fig 204722.5.rna.10                             |
|                                                | tRNA-Ser-CGA                                                                      | fig 439375.7.rna.15                             | fig 204722.5.rna.39                             |
|                                                | tRNA-Ser-GGA                                                                      | fig 439375.7.rna.24                             | fig 204722.5.rna.60                             |
|                                                | tRNA-Trp-CCA                                                                      | fig 439375.7.rna.33                             | fig 204722.5.rna.21                             |
|                                                | tRNA-Val-CAC                                                                      | fig 439375.7.rna.38                             | fig 204722.5.rna.15                             |
|                                                | tRNA-Val-GAC                                                                      | fig 439375.7.rna.70                             | fig 204722.5.rna.50                             |
| Universal GTPases                              | COG0536: GTP-binding protein Obg                                                  | fig 439375.7.peg.1102                           | fig 204722.5.peg.1877                           |
|                                                | GTPase and tRNA-U34 5-formylation enzyme TrmE                                     | fig 439375.7.peg.903                            | fig 204722.5.peg.2096                           |
|                                                | GTP-binding and nucleic acid-binding protein YchF                                 | fig 439375.7.peg.1717                           | fig 204722.5.peg.1561                           |
|                                                | GTP-binding protein EngA                                                          | fig 439375.7.peg.521                            | fig 204722.5.peg.393                            |
|                                                | GTP-binding protein EngB                                                          | fig 439375.7.peg.1426                           | fig 204722.5.peg.3249                           |
|                                                | GTP-binding protein Era                                                           | fig 439375.7.peg.2768                           | fig 204722.5.peg.675                            |
|                                                | GTP-binding protein HflX                                                          | fig 439375.7.peg.2320                           | fig 204722.5.peg.1130                           |
|                                                | GTP-binding protein TypA/BipA                                                     | fig 439375.7.peg.3460                           | fig 204722.5.peg.3093                           |
|                                                | Signal recognition particle receptor protein FtsY (=alpha subunit) (TC 3.A.5.1.1) | fig 439375.7.peg.970                            | fig 204722.5.peg.1968                           |
|                                                | Signal recognition particle, subunit Ffh SRP54 (TC 3.A.5.1.1)                     | fig 439375.7.peg.1126                           | fig 204722.5.peg.1856                           |
|                                                | Translation elongation factor G                                                   | fig 439375.7.peg.2055                           | fig 204722.5.peg.1258                           |
|                                                | Translation elongation factor LepA                                                | fig 439375.7.peg.1406                           | fig 204722.5.peg.3264                           |
|                                                |                                                                                   | fig 439375.7.peg.2043,<br>fig 439375.7.peg.2056 | fig 204722.5.peg.1257,<br>fig 204722.5.peg.1272 |
| Translation elongation factor Tu               | fig 439375.7.peg.2056                                                             | fig 204722.5.peg.1272                           |                                                 |
| Translation initiation factor 2                | fig 439375.7.peg.789                                                              | fig 204722.5.peg.2202                           |                                                 |
| Aminopeptidases (EC 3.4.11.-)                  | Aminopeptidase S (Leu, Val, Phe, Tyr preference) (EC 3.4.11.24)                   | fig 439375.7.peg.806                            | fig 204722.5.peg.2183                           |
|                                                | Cytosol aminopeptidase PepA (EC 3.4.11.1)                                         | fig 439375.7.peg.2741                           | fig 204722.5.peg.701                            |
|                                                | Membrane alanine aminopeptidase N (EC 3.4.11.2)                                   | fig 439375.7.peg.2807                           | fig 204722.5.peg.635                            |
|                                                | Peptidase B (EC 3.4.11.23)                                                        | fig 439375.7.peg.770                            | fig 204722.5.peg.2218                           |
|                                                | Xaa-Pro aminopeptidase (EC 3.4.11.9)                                              | fig 439375.7.peg.1859                           | fig 204722.5.peg.1444                           |
| Proteasome bacterial                           | ATP-dependent Clp protease ATP-binding subunit ClpX                               | fig 439375.7.peg.2317                           | fig 204722.5.peg.1128                           |
|                                                |                                                                                   | fig 439375.7.peg.512,<br>fig 439375.7.peg.1576, |                                                 |
|                                                | ATP-dependent Clp protease proteolytic subunit (EC 3.4.21.92)                     | fig 439375.7.peg.1886,<br>fig 439375.7.peg.2319 | fig 204722.5.peg.1129                           |
|                                                | ATP-dependent hsl protease ATP-binding subunit HslU                               | fig 439375.7.peg.886                            | fig 204722.5.peg.2115                           |
|                                                | ATP-dependent protease HslV (EC 3.4.25.-)                                         | fig 439375.7.peg.884                            | fig 204722.5.peg.2116                           |
|                                                | ATP-dependent protease La (EC 3.4.21.53) Type I                                   | fig 439375.7.peg.2316                           | fig 204722.5.peg.1127                           |
|                                                | Uncharacterized protein, similar to the N-terminal domain of Lon protease         | fig 439375.7.peg.3439                           | fig 204722.5.peg.3112                           |
| Arginine-tRNA-protein transferase (EC 2.3.2.8) | fig 439375.7.peg.2672                                                             | fig 204722.5.peg.768                            |                                                 |

|                                                                     |                                        |                                                                                         |                                                                                                    |                                                 |                       |
|---------------------------------------------------------------------|----------------------------------------|-----------------------------------------------------------------------------------------|----------------------------------------------------------------------------------------------------|-------------------------------------------------|-----------------------|
| <b>Protein degradation</b>                                          | Protein degradation                    | Asp-X dipeptidase                                                                       | fig 439375.7.peg.670,<br>fig 439375.7.peg.3234,<br>fig 439375.7.peg.4299                           |                                                 |                       |
|                                                                     |                                        | Deblocking aminopeptidase (EC 3.4.11.-)                                                 | fig 439375.7.peg.3106                                                                              |                                                 |                       |
|                                                                     |                                        | Dipeptidyl carboxypeptidase Dcp (EC 3.4.15.5)                                           | fig 439375.7.peg.3458                                                                              | fig 204722.5.peg.3095                           |                       |
|                                                                     |                                        | Leucyl/phenylalanyl-tRNA--protein transferase (EC 2.3.2.6)                              | fig 439375.7.peg.2395                                                                              | fig 204722.5.peg.918                            |                       |
|                                                                     |                                        | ATP-dependent Clp protease adaptor protein ClpS                                         | fig 439375.7.peg.2124                                                                              | fig 204722.5.peg.1189                           |                       |
|                                                                     | Proteolysis in bacteria, ATP-dependent | ATP-dependent Clp protease ATP-binding subunit ClpA                                     | fig 439375.7.peg.2125,<br>fig 439375.7.peg.4643                                                    | fig 204722.5.peg.1188                           |                       |
|                                                                     |                                        | ATP-dependent Clp protease ATP-binding subunit ClpX                                     | fig 439375.7.peg.2317                                                                              | fig 204722.5.peg.1128                           |                       |
|                                                                     |                                        | ATP-dependent Clp protease proteolytic subunit (EC 3.4.21.92)                           | fig 439375.7.peg.512,<br>fig 439375.7.peg.1576,<br>fig 439375.7.peg.1886,<br>fig 439375.7.peg.2319 | fig 204722.5.peg.1129                           |                       |
|                                                                     |                                        | ATP-dependent hsl protease ATP-binding subunit HslU                                     | fig 439375.7.peg.886                                                                               | fig 204722.5.peg.2115                           |                       |
|                                                                     |                                        | ATP-dependent protease HslV (EC 3.4.25.-)                                               | fig 439375.7.peg.884                                                                               | fig 204722.5.peg.2116                           |                       |
| ATP-dependent protease La (EC 3.4.21.53) Type I                     |                                        | fig 439375.7.peg.2316                                                                   | fig 204722.5.peg.1127                                                                              |                                                 |                       |
| ClpB protein                                                        |                                        | fig 439375.7.peg.1089                                                                   | fig 204722.5.peg.1899                                                                              |                                                 |                       |
| DNA repair protein RadA                                             |                                        | fig 439375.7.peg.601                                                                    | fig 204722.5.peg.464                                                                               |                                                 |                       |
| <b>Protein folding</b>                                              | GroEL GroES                            | Heat shock protein 60 family chaperone GroEL                                            | fig 439375.7.peg.3177                                                                              | fig 204722.5.peg.2412                           |                       |
|                                                                     |                                        | Heat shock protein 60 family co-chaperone GroES                                         | fig 439375.7.peg.3178                                                                              | fig 204722.5.peg.2413                           |                       |
|                                                                     | Peptidyl-prolyl cis-trans isomerase    | Foldase protein PrsA precursor (EC 5.2.1.8)                                             | fig 439375.7.peg.1072                                                                              | fig 204722.5.peg.1976                           |                       |
|                                                                     |                                        | Peptidyl-prolyl cis-trans isomerase ppiD (EC 5.2.1.8)                                   | fig 439375.7.peg.2155,<br>fig 439375.7.peg.3041                                                    | fig 204722.5.peg.1159,<br>fig 204722.5.peg.2512 |                       |
|                                                                     |                                        | Survival protein SurA precursor (Peptidyl-prolyl cis-trans isomerase SurA) (EC 5.2.1.8) | fig 439375.7.peg.2745                                                                              | fig 204722.5.peg.696                            |                       |
|                                                                     | Periplasmic disulfide interchange      | Cytochrome c-type biogenesis protein CcdA (DsbD analog)                                 | fig 439375.7.peg.3359,<br>fig 439375.7.peg.3807                                                    | fig 204722.5.peg.2800                           |                       |
|                                                                     |                                        | Cytochrome c-type biogenesis protein CcmG/DsbE, thiol:disulfide oxidoreductase          | fig 439375.7.peg.118                                                                               | fig 204722.5.peg.100                            |                       |
|                                                                     |                                        | Cytochrome c-type biogenesis protein DsbD, protein-disulfide reductase (EC 1.8.1.8)     | fig 439375.7.peg.503,<br>fig 439375.7.peg.3406                                                     |                                                 |                       |
|                                                                     |                                        | Periplasmic thiol:disulfide interchange protein DsbA                                    | fig 439375.7.peg.651                                                                               | fig 204722.5.peg.511                            |                       |
|                                                                     |                                        | Periplasmic thiol:disulfide oxidoreductase DsbB, required for DsbA reoxidation          | fig 439375.7.peg.1334                                                                              | fig 204722.5.peg.1671                           |                       |
|                                                                     | Protein chaperones                     | Chaperone protein DnaJ                                                                  | fig 439375.7.peg.832                                                                               | fig 204722.5.peg.2164                           |                       |
|                                                                     |                                        | Chaperone protein DnaK                                                                  | fig 439375.7.peg.834                                                                               | fig 204722.5.peg.2163                           |                       |
|                                                                     |                                        | ClpB protein                                                                            | fig 439375.7.peg.1089                                                                              | fig 204722.5.peg.1899                           |                       |
|                                                                     |                                        | DnaJ-class molecular chaperone CbpA                                                     | fig 439375.7.peg.571                                                                               | fig 204722.5.peg.434                            |                       |
|                                                                     |                                        | Heat shock protein GrpE                                                                 | fig 439375.7.peg.191                                                                               | fig 204722.5.peg.178                            |                       |
|                                                                     | Lipoprotein Biosynthesis               | Apolipoprotein N-acyltransferase (EC 2.3.1.-)                                           | fig 439375.7.peg.796                                                                               | fig 204722.5.peg.2195                           |                       |
|                                                                     |                                        | Lipoprotein signal peptidase (EC 3.4.23.36)                                             | fig 439375.7.peg.171,<br>fig 439375.7.peg.3358                                                     | fig 204722.5.peg.155                            |                       |
|                                                                     |                                        | Prolipoprotein diacylglycerol transferase (EC 2.4.99.-)                                 | fig 439375.7.peg.1727                                                                              | fig 204722.5.peg.1552                           |                       |
|                                                                     |                                        | Peptide methionine sulfoxide reductase                                                  | Peptide methionine sulfoxide reductase MsrA (EC 1.8.4.11)                                          | fig 439375.7.peg.1372                           | fig 204722.5.peg.3293 |
|                                                                     |                                        |                                                                                         | Peptide methionine sulfoxide reductase MsrB (EC 1.8.4.12)                                          | fig 439375.7.peg.3520                           | fig 204722.5.peg.2664 |
| MiaB family protein, possibly involved in tRNA or rRNA modification |                                        | fig 439375.7.peg.971                                                                    | fig 204722.5.peg.1967                                                                              |                                                 |                       |

|                                                          |                                                                    |                                                                                                            |                                                       |                                              |                       |
|----------------------------------------------------------|--------------------------------------------------------------------|------------------------------------------------------------------------------------------------------------|-------------------------------------------------------|----------------------------------------------|-----------------------|
| <b>Protein processing and modification</b>               | Ribosomal protein S12p Asp methylthiotransferase                   | Ribosomal protein S12p Asp88 (E. coli) methylthiotransferase                                               | fig 439375.7.peg.3788                                 | fig 204722.5.peg.2782                        |                       |
|                                                          |                                                                    | SSU ribosomal protein S12p (S23e)                                                                          | fig 439375.7.peg.2053                                 | fig 204722.5.peg.1260                        |                       |
|                                                          |                                                                    | tRNA-i(6)A37 methylthiotransferase                                                                         | fig 439375.7.peg.801                                  | fig 204722.5.peg.2190                        |                       |
|                                                          |                                                                    | Ribosomal protein S5p acylation                                                                            | Ribosomal-protein-S5p-alanine acetyltransferase       | fig 439375.7.peg.637                         | fig 204722.5.peg.497  |
|                                                          | Signal peptidase                                                   | Ribosomal protein S5p (S2e)                                                                                | SSU ribosomal protein S5p (S2e)                       | fig 439375.7.peg.2075                        | fig 204722.5.peg.1238 |
|                                                          |                                                                    |                                                                                                            | Lipoprotein signal peptidase (EC 3.4.23.36)           | fig 439375.7.peg.171, fig 439375.7.peg.3358  | fig 204722.5.peg.155  |
|                                                          |                                                                    |                                                                                                            | Signal peptidase I (EC 3.4.21.89)                     | fig 439375.7.peg.526, fig 439375.7.peg.2770  | fig 204722.5.peg.673  |
|                                                          | <b>Secretion</b>                                                   | Twin-arginine translocation system                                                                         | Twin-arginine translocation protein TatA              | fig 439375.7.peg.2475                        | fig 204722.5.peg.893  |
|                                                          |                                                                    |                                                                                                            | Twin-arginine translocation protein TatB              | fig 439375.7.peg.2474                        | fig 204722.5.peg.894  |
|                                                          |                                                                    |                                                                                                            | Twin-arginine translocation protein TatC              | fig 439375.7.peg.2473                        | fig 204722.5.peg.895  |
|                                                          | <b>Selenoproteins</b>                                              | Selenocysteine metabolism                                                                                  | L-seryl-tRNA(Sec) selenium transferase (EC 2.9.1.1)   | fig 439375.7.peg.3012                        |                       |
|                                                          |                                                                    |                                                                                                            | Selenide,water dikinase (EC 2.7.9.3)                  | fig 439375.7.peg.3005                        |                       |
|                                                          |                                                                    |                                                                                                            | selenocysteine-containing                             | fig 439375.7.peg.3008                        |                       |
|                                                          |                                                                    |                                                                                                            | Selenocysteine-specific translation elongation factor | fig 439375.7.peg.3014                        |                       |
| <b>Programmed Cell Death and Toxin-antitoxin Systems</b> | Murein hydrolase regulation and cell death                         | Antiholin-like protein LrgA                                                                                | fig 439375.7.peg.4168                                 |                                              |                       |
|                                                          |                                                                    | CidA-associated membrane protein CidB                                                                      | fig 439375.7.peg.448                                  | fig 204722.5.peg.339                         |                       |
|                                                          |                                                                    | Holin-like protein CidA                                                                                    | fig 439375.7.peg.447                                  | fig 204722.5.peg.338                         |                       |
|                                                          |                                                                    | LrgA-associated membrane protein LrgB                                                                      | fig 439375.7.peg.4167                                 |                                              |                       |
|                                                          |                                                                    |                                                                                                            | fig 439375.7.peg.446,                                 |                                              |                       |
|                                                          |                                                                    | LysR family regulatory protein CidR                                                                        | fig 439375.7.peg.3378                                 | fig 204722.5.peg.337                         |                       |
|                                                          |                                                                    | Preprotein translocase subunit SecG (TC 3.A.5.1.1)                                                         | fig 439375.7.peg.2157                                 | fig 204722.5.peg.1157                        |                       |
|                                                          | Phd-Doc, YdcE-YdcD toxin-antitoxin (programmed cell death) systems | Death on curing protein, Doc toxin                                                                         | fig 439375.7.peg.2854                                 | fig 204722.5.peg.574                         |                       |
|                                                          |                                                                    | Prevent host death protein, Phd antitoxin                                                                  | fig 439375.7.peg.2853                                 | fig 204722.5.peg.575                         |                       |
|                                                          | Toxin-antitoxin systems (other than RelBE and MazEF)               |                                                                                                            | fig 439375.7.peg.673,                                 |                                              |                       |
|                                                          |                                                                    | HigA protein (antitoxin to HigB)                                                                           | fig 439375.7.peg.4941                                 |                                              |                       |
|                                                          |                                                                    | HigB toxin protein                                                                                         | fig 439375.7.peg.4940                                 |                                              |                       |
|                                                          | cAMP signaling in bacteria                                         |                                                                                                            | Adenine phosphoribosyltransferase (EC 2.4.2.7)        | fig 439375.7.peg.1714                        | fig 204722.5.peg.1564 |
|                                                          |                                                                    |                                                                                                            |                                                       | fig 439375.7.peg.512, fig 439375.7.peg.1576, |                       |
|                                                          |                                                                    | ATP-dependent Clp protease proteolytic subunit (EC 3.4.21.92)                                              | fig 439375.7.peg.1886, fig 439375.7.peg.2319          | fig 204722.5.peg.1129                        |                       |
|                                                          |                                                                    |                                                                                                            | fig 439375.7.peg.285,                                 |                                              |                       |
|                                                          |                                                                    |                                                                                                            | fig 439375.7.peg.1010,                                | fig 204722.5.peg.204,                        |                       |
|                                                          |                                                                    | cAMP-binding proteins - catabolite gene activator and regulatory subunit of cAMP-dependent protein kinases | fig 439375.7.peg.3523, fig 439375.7.peg.4487          | fig 204722.5.peg.2041, fig 204722.5.peg.2628 |                       |
|                                                          |                                                                    | ElaA protein                                                                                               | fig 439375.7.peg.152                                  | fig 204722.5.peg.133                         |                       |
|                                                          |                                                                    | Putative Heme-regulated two-component response regulator                                                   | fig 439375.7.peg.1358, fig 439375.7.peg.3816          | fig 204722.5.peg.3228                        |                       |
|                                                          |                                                                    | Putative heme-binding lipoprotein                                                                          | fig 439375.7.peg.3135                                 | fig 204722.5.peg.3321                        |                       |
| DNA-binding regulatory proteins, strays                  |                                                                    |                                                                                                            | fig 439375.7.peg.3204,                                | fig 204722.5.peg.2568,                       |                       |
|                                                          | Hydrogen peroxide-inducible genes activator                        | fig 439375.7.peg.4000                                                                                      | fig 204722.5.peg.2924                                 |                                              |                       |
|                                                          | LysR family transcriptional regulator STM2281                      | fig 439375.7.peg.1677                                                                                      |                                                       |                                              |                       |
| Global Two-component Regulator PrrBA in Proteobacteria   |                                                                    | LysR family transcriptional regulator STM3121                                                              | fig 439375.7.peg.3562                                 | fig 204722.5.peg.2663                        |                       |
|                                                          | Dna binding response regulator PrrA (RegA)                         | fig 439375.7.peg.159                                                                                       | fig 204722.5.peg.143                                  |                                              |                       |
|                                                          | Sensor histidine kinase PrrB (RegB) (EC 2.7.3.-)                   | fig 439375.7.peg.157                                                                                       | fig 204722.5.peg.139                                  |                                              |                       |

|                                                  |                                                                                                                               |                                                                                |                                                                           |                        |
|--------------------------------------------------|-------------------------------------------------------------------------------------------------------------------------------|--------------------------------------------------------------------------------|---------------------------------------------------------------------------|------------------------|
| Regulation ε                                     | Regulation and Cell signaling                                                                                                 | Orphan regulatory proteins                                                     | fig 439375.7.peg.2705,<br>fig 439375.7.peg.4123,<br>fig 439375.7.peg.4254 |                        |
|                                                  |                                                                                                                               |                                                                                | Glycine cleavage system transcriptional activator GcvA                    |                        |
| Sensor protein basS/pmrB (EC 2.7.3.-)            | fig 439375.7.peg.3409                                                                                                         |                                                                                |                                                                           |                        |
| Sensory histidine kinase QseC                    | fig 439375.7.peg.501                                                                                                          |                                                                                |                                                                           |                        |
| Two-component sensor histidine kinase PleC       | fig 439375.7.peg.2808                                                                                                         |                                                                                |                                                                           |                        |
| Two-component system response regulator QseB     | fig 439375.7.peg.502,<br>fig 439375.7.peg.2819,<br>fig 439375.7.peg.3410                                                      |                                                                                |                                                                           |                        |
| The Chv regulatory system of Alphaproteobacteria |                                                                                                                               | DNA-binding response regulator ChvI                                            | fig 439375.7.peg.873                                                      | fig 204722.5.peg.2127  |
|                                                  |                                                                                                                               | Phosphocarrier protein, nitrogen regulation associated                         | fig 439375.7.peg.869                                                      | fig 204722.5.peg.2132  |
|                                                  |                                                                                                                               | PTS system permease (IIAMan), nitrogen regulatory IIA protein                  | fig 439375.7.peg.870                                                      | fig 204722.5.peg.2131  |
|                                                  |                                                                                                                               | Sensor histidine kinase ChvG (EC 2.7.3.-)                                      | fig 439375.7.peg.872                                                      | fig 204722.5.peg.2128  |
| Zinc regulated enzymes                           |                                                                                                                               | C4-type zinc finger protein, DksA/TraR family                                  | fig 439375.7.peg.2228                                                     | fig 204722.5.peg.1048  |
|                                                  |                                                                                                                               | Carbonic anhydrase (EC 4.2.1.1)                                                | fig 439375.7.peg.1123,                                                    | fig 204722.5.peg.1859, |
|                                                  |                                                                                                                               | Cysteinyl-tRNA synthetase (EC 6.1.1.16)                                        | fig 439375.7.peg.3003                                                     | fig 204722.5.peg.3003  |
|                                                  |                                                                                                                               |                                                                                | fig 439375.7.peg.2753                                                     | fig 204722.5.peg.689   |
|                                                  |                                                                                                                               |                                                                                | fig 439375.7.peg.2763,                                                    | fig 204722.5.peg.680,  |
|                                                  |                                                                                                                               | Dihydroorotase (EC 3.5.2.3)                                                    | fig 439375.7.peg.3830                                                     | fig 204722.5.peg.2817  |
|                                                  |                                                                                                                               | GTP cyclohydrolase I (EC 3.5.4.16) type 1                                      | fig 439375.7.peg.2266                                                     | fig 204722.5.peg.1089  |
|                                                  |                                                                                                                               |                                                                                | fig 439375.7.peg.1830,                                                    | fig 204722.5.peg.928,  |
|                                                  |                                                                                                                               | N-acetylmuramoyl-L-alanine amidase (EC 3.5.1.28)                               | fig 439375.7.peg.2385                                                     | fig 204722.5.peg.1470  |
|                                                  |                                                                                                                               | Phosphoribosyl-AMP cyclohydrolase (EC 3.5.4.19)                                | fig 439375.7.peg.2267                                                     | fig 204722.5.peg.1090  |
|                                                  |                                                                                                                               | Porphobilinogen synthase (EC 4.2.1.24)                                         | fig 439375.7.peg.2670                                                     | fig 204722.5.peg.770   |
|                                                  |                                                                                                                               | Putative metal chaperone, involved in Zn homeostasis, GTPase of COG0523 family | fig 439375.7.peg.1441,                                                    | fig 204722.5.peg.3211, |
|                                                  |                                                                                                                               | Queuosine biosynthesis QueD, PTPS-I                                            | fig 439375.7.peg.4345                                                     | fig 204722.5.peg.3349  |
| Zinc uptake regulation protein ZUR               | fig 439375.7.peg.1058                                                                                                         | fig 204722.5.peg.2010                                                          |                                                                           |                        |
| ATP synthases                                    | FOF1-type ATP synthase                                                                                                        | fig 439375.7.peg.4350                                                          | fig 204722.5.peg.3353                                                     |                        |
|                                                  |                                                                                                                               | fig 439375.7.peg.534,                                                          |                                                                           |                        |
|                                                  |                                                                                                                               | ATP synthase A chain (EC 3.6.3.14)                                             | fig 439375.7.peg.2648                                                     | fig 204722.5.peg.398   |
|                                                  |                                                                                                                               | ATP synthase alpha chain (EC 3.6.3.14)                                         | fig 439375.7.peg.1153                                                     | fig 204722.5.peg.1829  |
|                                                  |                                                                                                                               | ATP synthase B chain (EC 3.6.3.14)                                             | fig 439375.7.peg.537                                                      | fig 204722.5.peg.401   |
|                                                  |                                                                                                                               | ATP synthase B&#39; chain (EC 3.6.3.14)                                        | fig 439375.7.peg.536                                                      | fig 204722.5.peg.400   |
|                                                  |                                                                                                                               | ATP synthase beta chain (EC 3.6.3.14)                                          | fig 439375.7.peg.1155                                                     | fig 204722.5.peg.1827  |
|                                                  |                                                                                                                               | ATP synthase C chain (EC 3.6.3.14)                                             | fig 439375.7.peg.535                                                      | fig 204722.5.peg.399   |
|                                                  |                                                                                                                               |                                                                                | fig 439375.7.peg.1152,                                                    | fig 204722.5.peg.1487, |
|                                                  |                                                                                                                               | ATP synthase delta chain (EC 3.6.3.14)                                         | fig 439375.7.peg.1809                                                     | fig 204722.5.peg.1830  |
|                                                  |                                                                                                                               | ATP synthase epsilon chain (EC 3.6.3.14)                                       | fig 439375.7.peg.1156                                                     | fig 204722.5.peg.1826  |
|                                                  |                                                                                                                               | ATP synthase gamma chain (EC 3.6.3.14)                                         | fig 439375.7.peg.1154                                                     | fig 204722.5.peg.1828  |
|                                                  |                                                                                                                               | ATP synthase protein I                                                         | fig 439375.7.peg.533                                                      | fig 204722.5.peg.397   |
|                                                  |                                                                                                                               | Anaerobic dehydrogenases, typically selenocysteine-containing                  | fig 439375.7.peg.2717                                                     | fig 204722.5.peg.720   |
|                                                  | fig 439375.7.peg.346,<br>fig 439375.7.peg.2308,<br>fig 439375.7.peg.3354,<br>fig 439375.7.peg.3355,<br>fig 439375.7.peg.4857, | fig 204722.5.peg.259,                                                          |                                                                           |                        |
| Arsenate reductase (EC 1.20.4.1)                 | fig 439375.7.peg.4931                                                                                                         | fig 204722.5.peg.1001                                                          |                                                                           |                        |

**Electron accepting reactions**

|                                                                                |                                                                                    |                                                        |                        |                       |
|--------------------------------------------------------------------------------|------------------------------------------------------------------------------------|--------------------------------------------------------|------------------------|-----------------------|
| Anaerobic respiratory reductases                                               |                                                                                    |                                                        | fig 204722.5.peg.2437, |                       |
|                                                                                |                                                                                    | fig 439375.7.peg.3256,                                 | fig 204722.5.peg.2665, |                       |
|                                                                                | Butyryl-CoA dehydrogenase (EC 1.3.99.2)                                            | fig 439375.7.peg.4180                                  | fig 204722.5.peg.3313  |                       |
|                                                                                | Electron transfer flavoprotein-ubiquinone oxidoreductase (EC 1.5.5.1)              | fig 439375.7.peg.2803                                  | fig 204722.5.peg.639   |                       |
|                                                                                |                                                                                    | fig 439375.7.peg.3395,                                 |                        |                       |
|                                                                                |                                                                                    | fig 439375.7.peg.4036,                                 |                        |                       |
|                                                                                | Ferredoxin reductase                                                               | fig 439375.7.peg.4225                                  | fig 204722.5.peg.2944  |                       |
|                                                                                | Ferric reductase (1.6.99.14)                                                       | fig 439375.7.peg.4305                                  |                        |                       |
|                                                                                | Terminal cytochrome C oxidases                                                     | Cytochrome c oxidase polypeptide I (EC 1.9.3.1)        | fig 439375.7.peg.622   | fig 204722.5.peg.483  |
|                                                                                |                                                                                    | Cytochrome c oxidase polypeptide II (EC 1.9.3.1)       | fig 439375.7.peg.621   | fig 204722.5.peg.482  |
| Cytochrome c oxidase polypeptide III (EC 1.9.3.1)                              |                                                                                    | fig 439375.7.peg.626                                   | fig 204722.5.peg.487   |                       |
| Cytochrome c oxidase subunit CcoN (EC 1.9.3.1)                                 |                                                                                    | fig 439375.7.peg.500                                   | fig 204722.5.peg.379   |                       |
| Cytochrome c oxidase subunit CcoO (EC 1.9.3.1)                                 |                                                                                    | fig 439375.7.peg.499                                   | fig 204722.5.peg.378   |                       |
| Cytochrome c oxidase subunit CcoP (EC 1.9.3.1)                                 |                                                                                    | fig 439375.7.peg.496                                   | fig 204722.5.peg.376   |                       |
| Cytochrome c oxidase subunit CcoQ (EC 1.9.3.1)                                 |                                                                                    | fig 439375.7.peg.497                                   | fig 204722.5.peg.377   |                       |
| Cytochrome c oxidase, subunit IV (EC 1.9.3.1)                                  |                                                                                    | fig 439375.7.peg.1451                                  | fig 204722.5.peg.3196  |                       |
| membrane c-type cytochrome cy                                                  |                                                                                    | fig 439375.7.peg.16                                    | fig 204722.5.peg.43    |                       |
| Type cbb3 cytochrome oxidase biogenesis protein CcoG, involved in Cu oxidation |                                                                                    | fig 439375.7.peg.495                                   | fig 204722.5.peg.375   |                       |
| Terminal cytochrome d ubiquinol oxid                                           | Type cbb3 cytochrome oxidase biogenesis protein CcoS, involved in heme b insertion | fig 439375.7.peg.492                                   | fig 204722.5.peg.372   |                       |
|                                                                                | Cytochrome d ubiquinol oxidase subunit I (EC 1.10.3.-)                             | fig 439375.7.peg.3698                                  | fig 204722.5.peg.2727  |                       |
|                                                                                | Cytochrome d ubiquinol oxidase subunit II (EC 1.10.3.-)                            | fig 439375.7.peg.3699                                  | fig 204722.5.peg.2728  |                       |
|                                                                                | Transport ATP-binding protein CydC                                                 | fig 439375.7.peg.3697                                  | fig 204722.5.peg.2726  |                       |
|                                                                                | Transport ATP-binding protein CydD                                                 | fig 439375.7.peg.3696                                  | fig 204722.5.peg.2725  |                       |
|                                                                                | Cytochrome O ubiquinol oxidase subunit I (EC 1.10.3.-)                             | fig 439375.7.peg.50                                    | fig 204722.5.peg.47    |                       |
|                                                                                | Cytochrome O ubiquinol oxidase subunit II (EC 1.10.3.-)                            | fig 439375.7.peg.49                                    | fig 204722.5.peg.46    |                       |
|                                                                                | Cytochrome O ubiquinol oxidase subunit III (EC 1.10.3.-)                           | fig 439375.7.peg.51                                    | fig 204722.5.peg.48    |                       |
|                                                                                | Cytochrome O ubiquinol oxidase subunit IV (EC 1.10.3.-)                            | fig 439375.7.peg.52                                    | fig 204722.5.peg.49    |                       |
|                                                                                | Terminal cytochrome oxidases                                                       | Cytochrome d ubiquinol oxidase subunit I (EC 1.10.3.-) | fig 439375.7.peg.3698  | fig 204722.5.peg.2727 |
| Cytochrome d ubiquinol oxidase subunit II (EC 1.10.3.-)                        |                                                                                    | fig 439375.7.peg.3699                                  | fig 204722.5.peg.2728  |                       |
| Cytochrome O ubiquinol oxidase subunit I (EC 1.10.3.-)                         |                                                                                    | fig 439375.7.peg.50                                    | fig 204722.5.peg.47    |                       |
| Cytochrome O ubiquinol oxidase subunit II (EC 1.10.3.-)                        |                                                                                    | fig 439375.7.peg.49                                    | fig 204722.5.peg.46    |                       |
| Cytochrome O ubiquinol oxidase subunit III (EC 1.10.3.-)                       |                                                                                    | fig 439375.7.peg.51                                    | fig 204722.5.peg.48    |                       |
| Cytochrome O ubiquinol oxidase subunit IV (EC 1.10.3.-)                        |                                                                                    | fig 439375.7.peg.52                                    | fig 204722.5.peg.49    |                       |
| Transport ATP-binding protein CydC                                             |                                                                                    | fig 439375.7.peg.3697                                  | fig 204722.5.peg.2726  |                       |
| Transport ATP-binding protein CydD                                             |                                                                                    | fig 439375.7.peg.3696                                  | fig 204722.5.peg.2725  |                       |
| Ubiquinone Menaquinone-cytochrome c reductase complexes                        | ubiquinol cytochrome C oxidoreductase, cytochrome C1 subunit                       | fig 439375.7.peg.1713                                  | fig 204722.5.peg.1566  |                       |
|                                                                                | Ubiquinol-cytochrome C reductase iron-sulfur subunit (EC 1.10.2.2)                 | fig 439375.7.peg.1711                                  | fig 204722.5.peg.1568  |                       |
|                                                                                | Ubiquinol-cytochrome c reductase, cytochrome B subunit (EC 1.10.2.2)               | fig 439375.7.peg.1712                                  | fig 204722.5.peg.1567  |                       |
| Formate dehydrogenase                                                          | Formate dehydrogenase O alpha subunit (EC 1.2.1.2)                                 | fig 439375.7.peg.3008                                  |                        |                       |
|                                                                                | Formate dehydrogenase O beta subunit (EC 1.2.1.2)                                  | fig 439375.7.peg.3009                                  |                        |                       |
|                                                                                | Formate dehydrogenase O gamma subunit (EC 1.2.1.2)                                 | fig 439375.7.peg.3010                                  |                        |                       |
|                                                                                | NADH ubiquinone oxidoreductase chain A (EC 1.6.5.3)                                | fig 439375.7.peg.2556                                  | fig 204722.5.peg.812   |                       |
|                                                                                | NADH:ubiquinone oxidoreductase 17.2 kD subunit                                     | fig 439375.7.peg.2397                                  | fig 204722.5.peg.915   |                       |

Respiration

Electron donating reactions

|                                                                |                                                                                    |                                                         |                        |
|----------------------------------------------------------------|------------------------------------------------------------------------------------|---------------------------------------------------------|------------------------|
| Respiratory Complex I                                          | NADH-ubiquinone oxidoreductase chain B (EC 1.6.5.3)                                | fig 439375.7.peg.2555                                   | fig 204722.5.peg.813   |
|                                                                | NADH-ubiquinone oxidoreductase chain C (EC 1.6.5.3)                                | fig 439375.7.peg.2554                                   | fig 204722.5.peg.814   |
|                                                                | NADH-ubiquinone oxidoreductase chain D (EC 1.6.5.3)                                | fig 439375.7.peg.2552                                   | fig 204722.5.peg.815   |
|                                                                | NADH-ubiquinone oxidoreductase chain E (EC 1.6.5.3)                                | fig 439375.7.peg.2551                                   | fig 204722.5.peg.816   |
|                                                                | NADH-ubiquinone oxidoreductase chain F (EC 1.6.5.3)                                | fig 439375.7.peg.2550                                   | fig 204722.5.peg.817   |
|                                                                | NADH-ubiquinone oxidoreductase chain G (EC 1.6.5.3)                                | fig 439375.7.peg.2549                                   | fig 204722.5.peg.818   |
|                                                                | NADH-ubiquinone oxidoreductase chain H (EC 1.6.5.3)                                | fig 439375.7.peg.2548                                   | fig 204722.5.peg.819   |
|                                                                | NADH-ubiquinone oxidoreductase chain I (EC 1.6.5.3)                                | fig 439375.7.peg.2547                                   | fig 204722.5.peg.820   |
|                                                                | NADH-ubiquinone oxidoreductase chain J (EC 1.6.5.3)                                | fig 439375.7.peg.2546                                   | fig 204722.5.peg.821   |
|                                                                | NADH-ubiquinone oxidoreductase chain K (EC 1.6.5.3)                                | fig 439375.7.peg.2545                                   | fig 204722.5.peg.822   |
|                                                                | NADH-ubiquinone oxidoreductase chain L (EC 1.6.5.3)                                | fig 439375.7.peg.2544                                   | fig 204722.5.peg.823   |
|                                                                | NADH-ubiquinone oxidoreductase chain M (EC 1.6.5.3)                                | fig 439375.7.peg.2543                                   | fig 204722.5.peg.824   |
|                                                                | NADH-ubiquinone oxidoreductase chain N (EC 1.6.5.3)                                | fig 439375.7.peg.2542                                   | fig 204722.5.peg.825   |
|                                                                | Respiratory dehydrogenases 1                                                       | Aerobic glycerol-3-phosphate dehydrogenase (EC 1.1.5.3) | fig 439375.7.peg.289   |
|                                                                |                                                                                    | fig 439375.7.peg.1160,                                  | fig 204722.5.peg.1820, |
|                                                                |                                                                                    | fig 439375.7.peg.1513,                                  | fig 204722.5.peg.1821, |
|                                                                |                                                                                    | fig 439375.7.peg.3873,                                  | fig 204722.5.peg.2843, |
| D-amino acid dehydrogenase small subunit (EC 1.4.99.1)         |                                                                                    | fig 439375.7.peg.4248                                   | fig 204722.5.peg.3141  |
| Glucose dehydrogenase, PQQ-dependent (EC 1.1.5.2)              |                                                                                    | fig 439375.7.peg.316                                    |                        |
| Glucose-methanol-choline (GMC) oxidoreductase:NAD binding site |                                                                                    | fig 439375.7.peg.62,                                    | fig 204722.5.peg.2078  |
|                                                                |                                                                                    | fig 439375.7.peg.921                                    |                        |
|                                                                |                                                                                    | fig 439375.7.peg.2593,                                  |                        |
|                                                                |                                                                                    | fig 439375.7.peg.3066,                                  |                        |
| Glycerol-3-phosphate dehydrogenase (EC 1.1.5.3)                | fig 439375.7.peg.3228                                                              |                                                         |                        |
| L-lactate dehydrogenase (EC 1.1.2.3)                           | fig 439375.7.peg.1517                                                              | fig 204722.5.peg.3137                                   |                        |
| NADH dehydrogenase (EC 1.6.99.3)                               | fig 439375.7.peg.3640                                                              | fig 204722.5.peg.2699                                   |                        |
| Proline dehydrogenase (EC 1.5.99.8) (Proline oxidase)          | fig 439375.7.peg.4014                                                              | fig 204722.5.peg.2937                                   |                        |
| Succinate dehydrogenase                                        | Succinate dehydrogenase cytochrome b-556 subunit                                   | fig 439375.7.peg.996                                    | fig 204722.5.peg.1938  |
|                                                                | Succinate dehydrogenase flavoprotein subunit (EC 1.3.99.1)                         | fig 439375.7.peg.998                                    | fig 204722.5.peg.1936  |
|                                                                | Succinate dehydrogenase hydrophobic membrane anchor protein                        | fig 439375.7.peg.997                                    | fig 204722.5.peg.1937  |
|                                                                | Succinate dehydrogenase iron-sulfur protein (EC 1.3.99.1)                          | fig 439375.7.peg.999                                    | fig 204722.5.peg.1935  |
| Biogenesis of cbb3-type cytochrome c oxidases                  | Type cbb3 cytochrome oxidase biogenesis protein CcoG, involved in Cu oxidation     | fig 439375.7.peg.495                                    | fig 204722.5.peg.375   |
|                                                                | Type cbb3 cytochrome oxidase biogenesis protein CcoH                               | fig 439375.7.peg.494                                    | fig 204722.5.peg.374   |
|                                                                | Type cbb3 cytochrome oxidase biogenesis protein CcoI                               | fig 439375.7.peg.493                                    | fig 204722.5.peg.373   |
|                                                                | Type cbb3 cytochrome oxidase biogenesis protein CcoS, involved in heme b insertion | fig 439375.7.peg.492                                    | fig 204722.5.peg.372   |
|                                                                | ABC transporter involved in cytochrome c biogenesis, ATPase component CcmA         | fig 439375.7.peg.113                                    | fig 204722.5.peg.96    |
|                                                                | ABC transporter involved in cytochrome c biogenesis, CcmB subunit                  | fig 439375.7.peg.114                                    | fig 204722.5.peg.97    |
|                                                                | Cytochrome c heme lyase subunit CcmF                                               | fig 439375.7.peg.2814                                   | fig 204722.5.peg.626   |
|                                                                | Cytochrome c heme lyase subunit CcmH                                               | fig 439375.7.peg.2816                                   | fig 204722.5.peg.624   |
|                                                                | Cytochrome c heme lyase subunit CcmL                                               | fig 439375.7.peg.2813                                   | fig 204722.5.peg.627   |
|                                                                |                                                                                    | fig 439375.7.peg.3359,                                  |                        |
|                                                                | Cytochrome c-type biogenesis protein CcdA (DsbD analog)                            | fig 439375.7.peg.3807                                   | fig 204722.5.peg.2800  |
|                                                                | Cytochrome c-type biogenesis protein CcmC, putative heme lyase for CcmE            | fig 439375.7.peg.116                                    | fig 204722.5.peg.98    |

**Respiration**

|                                                              |                                                                                     |                                                                                        |                                                 |                                                 |
|--------------------------------------------------------------|-------------------------------------------------------------------------------------|----------------------------------------------------------------------------------------|-------------------------------------------------|-------------------------------------------------|
| Biogenesis of c-type cytochromes                             | Cytochrome c-type biogenesis protein CcmD, interacts with CcmCE                     | fig 439375.7.peg.117                                                                   | fig 204722.5.peg.99                             |                                                 |
|                                                              | Cytochrome c-type biogenesis protein CcmE, heme chaperone                           | fig 439375.7.peg.2815                                                                  | fig 204722.5.peg.625                            |                                                 |
|                                                              | Cytochrome c-type biogenesis protein CcmG/DsbE, thiol:disulfide oxidoreductase      | fig 439375.7.peg.118                                                                   | fig 204722.5.peg.100                            |                                                 |
|                                                              | Cytochrome c-type biogenesis protein DsbD, protein-disulfide reductase (EC 1.8.1.8) | fig 439375.7.peg.503,<br>fig 439375.7.peg.3406                                         |                                                 |                                                 |
|                                                              | Periplasmic thiol:disulfide interchange protein DsbA                                | fig 439375.7.peg.651                                                                   | fig 204722.5.peg.511                            |                                                 |
|                                                              | Periplasmic thiol:disulfide oxidoreductase DsbB, required for DsbA reoxidation      | fig 439375.7.peg.1334                                                                  | fig 204722.5.peg.1671                           |                                                 |
|                                                              | Thiol:disulfide oxidoreductase TlpA                                                 | fig 439375.7.peg.1048                                                                  | fig 204722.5.peg.2017                           |                                                 |
|                                                              | Biogenesis of cytochrome c oxidases                                                 | Cytochrome oxidase biogenesis protein Cox11-CtaG, copper delivery to Cox1              | fig 439375.7.peg.624,<br>fig 439375.7.peg.625   | fig 204722.5.peg.485,<br>fig 204722.5.peg.486   |
|                                                              |                                                                                     | Cytochrome oxidase biogenesis protein Sco1/SenC/PrrC, putative copper metallochaperone | fig 439375.7.peg.1861,<br>fig 439375.7.peg.3360 | fig 204722.5.peg.1442                           |
|                                                              |                                                                                     | Cytochrome oxidase biogenesis protein Surf1, facilitates heme A insertion              | fig 439375.7.peg.628,<br>fig 439375.7.peg.3714  | fig 204722.5.peg.489,<br>fig 204722.5.peg.2743  |
|                                                              |                                                                                     | Ferredoxin--NADP(+) reductase (EC 1.18.1.2)                                            | fig 439375.7.peg.462                            | fig 204722.5.peg.344                            |
|                                                              |                                                                                     | Heme A synthase, cytochrome oxidase biogenesis protein Cox15-CtaA                      | fig 439375.7.peg.2635                           | fig 204722.5.peg.797                            |
|                                                              |                                                                                     | Heme O synthase, protoheme IX farnesyltransferase (EC 2.5.1.-) COX10-CtaB              | fig 439375.7.peg.623                            | fig 204722.5.peg.484                            |
|                                                              |                                                                                     |                                                                                        |                                                 | fig 204722.5.peg.2907,<br>fig 204722.5.peg.2908 |
|                                                              | Formate hydrogenase                                                                 | Formate dehydrogenase chain D (EC 1.2.1.2)                                             | fig 439375.7.peg.3986                           | fig 204722.5.peg.2908                           |
|                                                              |                                                                                     | formate dehydrogenase formation protein FdhE                                           | fig 439375.7.peg.3011                           |                                                 |
|                                                              |                                                                                     | Formate dehydrogenase O alpha subunit (EC 1.2.1.2)                                     | fig 439375.7.peg.3008                           |                                                 |
|                                                              |                                                                                     | Formate dehydrogenase O beta subunit (EC 1.2.1.2)                                      | fig 439375.7.peg.3009                           |                                                 |
|                                                              |                                                                                     | Formate dehydrogenase O gamma subunit (EC 1.2.1.2)                                     | fig 439375.7.peg.3010                           |                                                 |
|                                                              | Soluble cytochromes and functionally related electron carriers                      | Putative formate dehydrogenase oxidoreductase protein                                  | fig 439375.7.peg.1518                           | fig 204722.5.peg.3136                           |
|                                                              |                                                                                     | Cytochrome c2                                                                          | fig 439375.7.peg.3096                           | fig 204722.5.peg.2389                           |
|                                                              |                                                                                     | Ferredoxin                                                                             |                                                 | fig 204722.5.peg.2596                           |
|                                                              |                                                                                     | Ferredoxin, 2Fe-2S                                                                     | fig 439375.7.peg.2218                           | fig 204722.5.peg.1038                           |
|                                                              |                                                                                     | fig 439375.7.peg.725,<br>fig 439375.7.peg.2842                                         |                                                 |                                                 |
|                                                              |                                                                                     | Putative diheme cytochrome c-553                                                       |                                                 |                                                 |
|                                                              | ATP-dependent RNA helicases, bacterial                                              | ATP-dependent RNA helicase Atu1833                                                     | fig 439375.7.peg.2366                           | fig 204722.5.peg.953                            |
|                                                              |                                                                                     | ATP-dependent RNA helicase RhlE                                                        | fig 439375.7.peg.2246                           | fig 204722.5.peg.1066                           |
|                                                              | Methylthiotransferases                                                              | MiaB family protein, possibly involved in tRNA or rRNA modification                    | fig 439375.7.peg.971                            | fig 204722.5.peg.1967                           |
| Ribosomal protein S12p Asp88 (E. coli) methylthiotransferase |                                                                                     | fig 439375.7.peg.3788                                                                  | fig 204722.5.peg.2782                           |                                                 |
| tRNA-i(6)A37 methylthiotransferase                           |                                                                                     | fig 439375.7.peg.801                                                                   | fig 204722.5.peg.2190                           |                                                 |
| glutamyl-Q-tRNA synthetase                                   |                                                                                     | fig 439375.7.peg.1331                                                                  | fig 204722.5.peg.1674                           |                                                 |
|                                                              | GTP cyclohydrolase I (EC 3.5.4.16) type 1                                           | fig 439375.7.peg.2266                                                                  | fig 204722.5.peg.1089                           |                                                 |
|                                                              |                                                                                     | fig 439375.7.peg.2900,                                                                 |                                                 |                                                 |
|                                                              | Inosine-uridine preferring nucleoside hydrolase (EC 3.2.2.1)                        | fig 439375.7.peg.4623                                                                  | fig 204722.5.peg.2228                           |                                                 |
|                                                              | NADPH dependent preQ0 reductase                                                     | fig 439375.7.peg.2110                                                                  | fig 204722.5.peg.1203                           |                                                 |
|                                                              |                                                                                     | fig 439375.7.peg.2288,                                                                 | fig 204722.5.peg.1114,                          |                                                 |
|                                                              | Peptidyl-prolyl cis-trans isomerase (EC 5.2.1.8)                                    | fig 439375.7.peg.2289                                                                  | fig 204722.5.peg.1115                           |                                                 |

RNA Metabolism

RNA processing and modification

|                                                        |                                                                                                                                         |                                                                                                                                                                                                            |                                                                                                     |                       |
|--------------------------------------------------------|-----------------------------------------------------------------------------------------------------------------------------------------|------------------------------------------------------------------------------------------------------------------------------------------------------------------------------------------------------------|-----------------------------------------------------------------------------------------------------|-----------------------|
| Queuosine-Archaeosine Biosynthesis                     |                                                                                                                                         | fig 439375.7.peg.390,<br>fig 439375.7.peg.1015,<br>fig 439375.7.peg.1052,<br>fig 439375.7.peg.1661,<br>fig 439375.7.peg.1747,<br>fig 439375.7.peg.2703,<br>fig 439375.7.peg.3116,<br>fig 439375.7.peg.3515 | fig 204722.5.peg.1532,<br>fig 204722.5.peg.1908,<br>fig 204722.5.peg.1927,<br>fig 204722.5.peg.3069 |                       |
|                                                        | Permease of the drug/metabolite transporter (DMT) superfamily                                                                           | fig 439375.7.peg.961                                                                                                                                                                                       | fig 204722.5.peg.2049                                                                               |                       |
|                                                        | Putative preQ0 transporter                                                                                                              | fig 439375.7.peg.1059                                                                                                                                                                                      | fig 204722.5.peg.2009                                                                               |                       |
|                                                        | Queuosine Biosynthesis QueC ATPase                                                                                                      | fig 439375.7.peg.1058                                                                                                                                                                                      | fig 204722.5.peg.2010                                                                               |                       |
|                                                        | Queuosine biosynthesis QueD, PTPS-I                                                                                                     | fig 439375.7.peg.1057                                                                                                                                                                                      | fig 204722.5.peg.2011                                                                               |                       |
|                                                        | Queuosine Biosynthesis QueE Radical SAM                                                                                                 |                                                                                                                                                                                                            |                                                                                                     |                       |
|                                                        | Radical SAM family enzyme, similar to coproporphyrinogen III oxidase, oxygen-independent, clustered with nucleoside-triphosphatase RdgB | fig 439375.7.peg.196                                                                                                                                                                                       | fig 204722.5.peg.184                                                                                |                       |
|                                                        | S-adenosylmethionine:tRNA ribosyltransferase-isomerase (EC 5.-.-.-)                                                                     | fig 439375.7.peg.2287                                                                                                                                                                                      | fig 204722.5.peg.1113<br>fig 204722.5.peg.989,                                                      |                       |
|                                                        | tRNA-guanine transglycosylase (EC 2.4.2.29)                                                                                             | fig 439375.7.peg.2286                                                                                                                                                                                      | fig 204722.5.peg.1112                                                                               |                       |
|                                                        | 3'5'-phosphatase RNase R                                                                                                                | fig 439375.7.peg.3835                                                                                                                                                                                      | fig 204722.5.peg.2822                                                                               |                       |
|                                                        | Cytoplasmic axial filament protein CafA and Ribonuclease G (EC 3.1.4.-)                                                                 | fig 439375.7.peg.2387                                                                                                                                                                                      | fig 204722.5.peg.927                                                                                |                       |
|                                                        | Ribonuclease III (EC 3.1.26.3)                                                                                                          | fig 439375.7.peg.2769                                                                                                                                                                                      | fig 204722.5.peg.674                                                                                |                       |
|                                                        | Ribonuclease BN (EC 3.1.-.-)                                                                                                            | fig 439375.7.peg.1053                                                                                                                                                                                      | fig 204722.5.peg.2015                                                                               |                       |
|                                                        | Ribonuclease D (EC 3.1.26.3)                                                                                                            | fig 439375.7.peg.2677                                                                                                                                                                                      | fig 204722.5.peg.764                                                                                |                       |
| Ribonuclease P protein component (EC 3.1.26.5)         | fig 439375.7.peg.1428                                                                                                                   | fig 204722.5.peg.3247                                                                                                                                                                                      |                                                                                                     |                       |
| Ribonuclease PH (EC 2.7.7.56)                          | fig 439375.7.peg.193                                                                                                                    | fig 204722.5.peg.181                                                                                                                                                                                       |                                                                                                     |                       |
| tRNA processing                                        | tRNA delta(2)-isopentenylpyrophosphate transferase (EC 2.5.1.8)                                                                         | fig 439375.7.peg.1902                                                                                                                                                                                      | fig 204722.5.peg.1416<br>fig 204722.5.peg.2420,                                                     |                       |
|                                                        | tRNA pseudouridine synthase A (EC 4.2.1.70)                                                                                             | fig 439375.7.peg.1411                                                                                                                                                                                      | fig 204722.5.peg.3258                                                                               |                       |
|                                                        | tRNA pseudouridine synthase B (EC 4.2.1.70)                                                                                             | fig 439375.7.peg.787                                                                                                                                                                                       | fig 204722.5.peg.2204                                                                               |                       |
|                                                        | tRNA(Ile)-lysidine synthetase                                                                                                           | fig 439375.7.peg.1277                                                                                                                                                                                      | fig 204722.5.peg.1719                                                                               |                       |
|                                                        | tRNA-i(6)A37 methyltransferase                                                                                                          | fig 439375.7.peg.801                                                                                                                                                                                       | fig 204722.5.peg.2190                                                                               |                       |
|                                                        | tRNA-specific adenosine-34 deaminase (EC 3.5.4.-)                                                                                       | fig 439375.7.peg.3186                                                                                                                                                                                      | fig 204722.5.peg.2419                                                                               |                       |
|                                                        | RNA polymerase bacterial                                                                                                                | DNA-directed RNA polymerase alpha subunit (EC 2.7.7.6)                                                                                                                                                     | fig 439375.7.peg.2082                                                                               | fig 204722.5.peg.1231 |
|                                                        |                                                                                                                                         | DNA-directed RNA polymerase beta subunit (EC 2.7.7.6)                                                                                                                                                      | fig 439375.7.peg.2050                                                                               | fig 204722.5.peg.1265 |
| DNA-directed RNA polymerase beta' subunit (EC 2.7.7.6) |                                                                                                                                         | fig 439375.7.peg.2051                                                                                                                                                                                      | fig 204722.5.peg.1264                                                                               |                       |
| DNA-directed RNA polymerase omega subunit (EC 2.7.7.6) |                                                                                                                                         | fig 439375.7.peg.2779                                                                                                                                                                                      | fig 204722.5.peg.664                                                                                |                       |
| Rrf2 family transcriptional regulators                 | Iron-responsive repressor RirA                                                                                                          | fig 439375.7.peg.3778                                                                                                                                                                                      | fig 204722.5.peg.2778                                                                               |                       |
|                                                        | Rrf2 family transcriptional regulator                                                                                                   | fig 439375.7.peg.4344,<br>fig 439375.7.peg.4530                                                                                                                                                            | fig 204722.5.peg.3348                                                                               |                       |
|                                                        | Rrf2 family transcriptional regulator, group III                                                                                        | fig 439375.7.peg.3744                                                                                                                                                                                      |                                                                                                     |                       |
| Transcription                                          | COG2740: Predicted nucleic-acid-binding protein implicated in transcription termination                                                 | fig 439375.7.peg.790                                                                                                                                                                                       | fig 204722.5.peg.2201                                                                               |                       |
|                                                        | Regulator of nucleoside diphosphate kinase                                                                                              | fig 439375.7.peg.3844                                                                                                                                                                                      | fig 204722.5.peg.2830                                                                               |                       |
|                                                        | ribosomal protein L7Ae family protein                                                                                                   | fig 439375.7.peg.790                                                                                                                                                                                       | fig 204722.5.peg.2201                                                                               |                       |
|                                                        | Transcription antitermination protein NusG                                                                                              | fig 439375.7.peg.2045                                                                                                                                                                                      | fig 204722.5.peg.1270                                                                               |                       |

|                                                                                      |                                                              |                                                                                                   |                                                                                                   |                                                                           |
|--------------------------------------------------------------------------------------|--------------------------------------------------------------|---------------------------------------------------------------------------------------------------|---------------------------------------------------------------------------------------------------|---------------------------------------------------------------------------|
| Transcription                                                                        | Transcription factors bacterial                              | Transcription elongation factor GreA                                                              | fig 439375.7.peg.1750                                                                             | fig 204722.5.peg.1529                                                     |
|                                                                                      |                                                              | Transcription elongation factor GreB                                                              | fig 439375.7.peg.2855                                                                             | fig 204722.5.peg.573                                                      |
|                                                                                      |                                                              | Transcription termination factor Rho                                                              | fig 439375.7.peg.901                                                                              | fig 204722.5.peg.2098                                                     |
|                                                                                      |                                                              | Transcription termination protein NusA                                                            | fig 439375.7.peg.791                                                                              | fig 204722.5.peg.2200                                                     |
|                                                                                      |                                                              | Transcription termination protein NusB                                                            | fig 439375.7.peg.2659                                                                             | fig 204722.5.peg.781                                                      |
|                                                                                      |                                                              | Transcription-repair coupling factor                                                              | fig 439375.7.peg.3801                                                                             | fig 204722.5.peg.2795                                                     |
|                                                                                      | Transcription initiation, bacterial sigma factors            | RNA polymerase sigma factor RpoD                                                                  | fig 439375.7.peg.1780                                                                             | fig 204722.5.peg.1506                                                     |
|                                                                                      |                                                              | RNA polymerase sigma factor RpoH                                                                  | fig 439375.7.peg.1293                                                                             | fig 204722.5.peg.1677                                                     |
|                                                                                      |                                                              | RNA polymerase sigma factor RpoH-related protein                                                  | fig 439375.7.peg.1190                                                                             | fig 204722.5.peg.1790                                                     |
|                                                                                      |                                                              | RNA polymerase sigma-54 factor RpoN                                                               | fig 439375.7.peg.181,<br>fig 439375.7.peg.1307,<br>fig 439375.7.peg.3554                          | fig 204722.5.peg.164                                                      |
|                                                                                      |                                                              | RNA polymerase sigma-70 factor                                                                    | fig 439375.7.peg.1510,<br>fig 439375.7.peg.1788                                                   | fig 204722.5.peg.1685                                                     |
|                                                                                      |                                                              | Cold shock, CspA family of proteins                                                               | Cold shock protein CspA                                                                           | fig 439375.7.peg.1767                                                     |
|                                                                                      | Cold shock protein CspB                                      |                                                                                                   | fig 439375.7.peg.2024                                                                             | fig 204722.5.peg.1285                                                     |
| Cold shock protein CspG                                                              | fig 439375.7.peg.1738                                        |                                                                                                   | fig 204722.5.peg.1539                                                                             |                                                                           |
| Detoxification                                                                       | Glutathione-dependent pathway of formaldehyde detoxification | S-(hydroxymethyl)glutathione dehydrogenase (EC 1.1.1.284)                                         | fig 439375.7.peg.153                                                                              | fig 204722.5.peg.134,<br>fig 204722.5.peg.135                             |
|                                                                                      |                                                              | S-formylglutathione hydrolase (EC 3.1.2.12)                                                       | fig 439375.7.peg.150                                                                              | fig 204722.5.peg.131                                                      |
|                                                                                      |                                                              | Resistance to chromium compounds                                                                  | Chromate transport protein ChrA                                                                   | fig 439375.7.peg.1721,<br>fig 439375.7.peg.4854,<br>fig 439375.7.peg.4928 |
|                                                                                      | Uptake of selenate and selenite                              | Sulfate and thiosulfate import ATP-binding protein CysA (EC 3.6.3.25)                             | fig 439375.7.peg.130                                                                              | fig 204722.5.peg.114                                                      |
|                                                                                      |                                                              | Various polyols ABC transporter, ATP-binding component                                            | fig 439375.7.peg.4019                                                                             | fig 204722.5.peg.2481                                                     |
|                                                                                      |                                                              | Various polyols ABC transporter, periplasmic substrate-binding protein                            | fig 439375.7.peg.4022                                                                             |                                                                           |
|                                                                                      |                                                              | Various polyols ABC transporter, permease component 1                                             | fig 439375.7.peg.4021                                                                             |                                                                           |
|                                                                                      | Various polyols ABC transporter, permease component 2        | fig 439375.7.peg.4020                                                                             |                                                                                                   |                                                                           |
|                                                                                      | Choline and Betaine Uptake and Betaine Biosynthesis          | Betaine aldehyde dehydrogenase (EC 1.2.1.8)                                                       | fig 439375.7.peg.2858                                                                             | fig 204722.5.peg.569,<br>fig 204722.5.peg.570,<br>fig 204722.5.peg.2076,  |
|                                                                                      |                                                              | Choline dehydrogenase (EC 1.1.99.1)                                                               | fig 439375.7.peg.923,<br>fig 439375.7.peg.2857                                                    | fig 204722.5.peg.2611,<br>fig 204722.5.peg.3179                           |
| Choline-sulfatase (EC 3.1.6.6)                                                       |                                                              | fig 439375.7.peg.3478                                                                             | fig 204722.5.peg.3416                                                                             |                                                                           |
| HTH-type transcriptional regulator BetI                                              |                                                              | fig 439375.7.peg.2856                                                                             | fig 204722.5.peg.571                                                                              |                                                                           |
| L-proline glycine betaine ABC transport system permease protein ProV (TC 3.A.1.12.1) |                                                              | fig 439375.7.peg.319,<br>fig 439375.7.peg.1671,<br>fig 439375.7.peg.4058                          | fig 204722.5.peg.230,<br>fig 204722.5.peg.1606,<br>fig 204722.5.peg.2953                          |                                                                           |
| L-proline glycine betaine ABC transport system permease protein ProW (TC 3.A.1.12.1) |                                                              | fig 439375.7.peg.318,<br>fig 439375.7.peg.320,<br>fig 439375.7.peg.1672,<br>fig 439375.7.peg.4057 | fig 204722.5.peg.229,<br>fig 204722.5.peg.231,<br>fig 204722.5.peg.1605,<br>fig 204722.5.peg.2952 |                                                                           |
| L-proline glycine betaine binding ABC transporter protein ProX (TC 3.A.1.12.1)       |                                                              | fig 439375.7.peg.1673,<br>fig 439375.7.peg.3068,<br>fig 439375.7.peg.3479                         | fig 204722.5.peg.1604,<br>fig 204722.5.peg.2951                                                   |                                                                           |
| Osmotic stress                                                                       |                                                              |                                                                                                   |                                                                                                   |                                                                           |
|                                                                                      |                                                              |                                                                                                   |                                                                                                   |                                                                           |
|                                                                                      |                                                              |                                                                                                   |                                                                                                   |                                                                           |

## Osmotic stress

|                                                    |                                                                                                                                                                                                              |                                                                                                   |                                                                                                   |
|----------------------------------------------------|--------------------------------------------------------------------------------------------------------------------------------------------------------------------------------------------------------------|---------------------------------------------------------------------------------------------------|---------------------------------------------------------------------------------------------------|
|                                                    | Sarcosine oxidase alpha subunit (EC 1.5.3.1)                                                                                                                                                                 | fig 439375.7.peg.325,<br>fig 439375.7.peg.1964                                                    | fig 204722.5.peg.237,<br>fig 204722.5.peg.1342,<br>fig 204722.5.peg.1343                          |
|                                                    | Sarcosine oxidase beta subunit (EC 1.5.3.1)                                                                                                                                                                  | fig 439375.7.peg.323,<br>fig 439375.7.peg.4611                                                    | fig 204722.5.peg.235                                                                              |
|                                                    | Sarcosine oxidase delta subunit (EC 1.5.3.1)                                                                                                                                                                 | fig 439375.7.peg.324                                                                              | fig 204722.5.peg.236                                                                              |
|                                                    | Sarcosine oxidase gamma subunit (EC 1.5.3.1)                                                                                                                                                                 | fig 439375.7.peg.326                                                                              | fig 204722.5.peg.238                                                                              |
| Ectoine biosynthesis and regulation                | L-ectoine synthase (EC 4.2.1.-)                                                                                                                                                                              | fig 439375.7.peg.2938                                                                             |                                                                                                   |
| Osmoregulation                                     | Aquaporin Z                                                                                                                                                                                                  | fig 439375.7.peg.1028                                                                             | fig 204722.5.peg.2038                                                                             |
|                                                    | Outer membrane protein A precursor                                                                                                                                                                           | fig 439375.7.peg.523                                                                              |                                                                                                   |
| Synthesis of osmoregulated periplasmic glucans     | 2)glucan export ATP-binding/permease protein NdvA (EC 3.6.3.42)&subsystem_name=Synthesis_of_osmoregulated_periplasmic_glucans&#39;>Beta-(1-->2)glucan export ATP-binding/permease protein NdvA (EC 3.6.3.42) | fig 439375.7.peg.2188                                                                             | fig 204722.5.peg.1010                                                                             |
|                                                    | Cyclic beta-1,2-glucan modification transmembrane protein                                                                                                                                                    | fig 439375.7.peg.295                                                                              |                                                                                                   |
|                                                    | Cyclic beta-1,2-glucan synthase (EC 2.4.1.-)                                                                                                                                                                 | fig 439375.7.peg.132                                                                              | fig 204722.5.peg.115                                                                              |
|                                                    | OpgC protein                                                                                                                                                                                                 | fig 439375.7.peg.1263                                                                             | fig 204722.5.peg.1733                                                                             |
| Glutaredoxins                                      | Competence protein F homolog, phosphoribosyltransferase domain                                                                                                                                               | fig 439375.7.peg.1078                                                                             | fig 204722.5.peg.1912                                                                             |
|                                                    | Glutaredoxin 3 (Grx2)                                                                                                                                                                                        | fig 439375.7.peg.1079                                                                             | fig 204722.5.peg.1911                                                                             |
|                                                    | Glutaredoxin-like protein NrdH, required for reduction of Ribonucleotide reductase class Ib                                                                                                                  | fig 439375.7.peg.3102                                                                             | fig 204722.5.peg.2530                                                                             |
|                                                    | Uncharacterized monothiol glutaredoxin ycf64-like                                                                                                                                                            | fig 439375.7.peg.2522                                                                             | fig 204722.5.peg.846                                                                              |
| Glutathione: Biosynthesis and gamma-glutamyl cycle | Gamma-glutamyltranspeptidase (EC 2.3.2.2)                                                                                                                                                                    | fig 439375.7.peg.4583                                                                             |                                                                                                   |
|                                                    | Glutamate--cysteine ligase (EC 6.3.2.2)                                                                                                                                                                      | fig 439375.7.peg.3149                                                                             | fig 204722.5.peg.2975                                                                             |
|                                                    | Glutathione synthetase (EC 6.3.2.3)                                                                                                                                                                          | fig 439375.7.peg.826                                                                              | fig 204722.5.peg.2169                                                                             |
|                                                    | Similar to 5-oxoprolinase (EC 3.5.2.9) and Methylhydantoinases A, B (EC 3.5.2.14)                                                                                                                            | fig 439375.7.peg.3972                                                                             | fig 204722.5.peg.2892                                                                             |
| Glutathione: Non-redox reactions                   |                                                                                                                                                                                                              | fig 439375.7.peg.34,<br>fig 439375.7.peg.1360,<br>fig 439375.7.peg.2093,<br>fig 439375.7.peg.2799 | fig 204722.5.peg.644,<br>fig 204722.5.peg.3226                                                    |
|                                                    | Glutathione S-transferase (EC 2.5.1.18)                                                                                                                                                                      | fig 439375.7.peg.1403,<br>fig 439375.7.peg.2516,<br>fig 439375.7.peg.2723                         | fig 204722.5.peg.714,<br>fig 204722.5.peg.850,<br>fig 204722.5.peg.3269                           |
|                                                    | Glutathione S-transferase family protein                                                                                                                                                                     | fig 439375.7.peg.1691                                                                             | fig 204722.5.peg.1589                                                                             |
|                                                    | Glutathione S-transferase, omega (EC 2.5.1.18)                                                                                                                                                               | fig 439375.7.peg.395                                                                              |                                                                                                   |
|                                                    | Glutathione S-transferase, unnamed subgroup 2 (EC 2.5.1.18)                                                                                                                                                  | fig 439375.7.peg.395                                                                              |                                                                                                   |
|                                                    | Glutathione S-transferase, unnamed subgroup (EC 2.5.1.18)                                                                                                                                                    |                                                                                                   | fig 204722.5.peg.1521                                                                             |
|                                                    | Hydroxyacylglutathione hydrolase (EC 3.1.2.6)                                                                                                                                                                | fig 439375.7.peg.968,<br>fig 439375.7.peg.3688                                                    | fig 204722.5.peg.1970,<br>fig 204722.5.peg.2716                                                   |
|                                                    |                                                                                                                                                                                                              |                                                                                                   | fig 204722.5.peg.60,<br>fig 204722.5.peg.1287,<br>fig 204722.5.peg.2251,<br>fig 204722.5.peg.3096 |
|                                                    | Lactoylglutathione lyase (EC 4.4.1.5)                                                                                                                                                                        | fig 439375.7.peg.64,<br>fig 439375.7.peg.2023                                                     | fig 204722.5.peg.2251,<br>fig 204722.5.peg.3096                                                   |
|                                                    | SAM-dependent methyltransferase 2, in cluster with Hydroxyacylglutathione hydrolase (EC 3.1.2.6)                                                                                                             | fig 439375.7.peg.1042                                                                             | fig 204722.5.peg.2023                                                                             |
|                                                    | Uncharacterized glutathione S-transferase-like protein                                                                                                                                                       | fig 439375.7.peg.2353                                                                             | fig 204722.5.peg.965                                                                              |
|                                                    | Glutaredoxin 3 (Grx2)                                                                                                                                                                                        | fig 439375.7.peg.1079                                                                             | fig 204722.5.peg.1911                                                                             |

**Oxidative stress**

|                                           |                                                                                             |                                                                                         |                        |                       |
|-------------------------------------------|---------------------------------------------------------------------------------------------|-----------------------------------------------------------------------------------------|------------------------|-----------------------|
| Glutathione: Redox cycle                  | Glutaredoxin-like protein NrdH, required for reduction of Ribonucleotide reductase class Ib | fig 439375.7.peg.3102                                                                   | fig 204722.5.peg.2530  |                       |
|                                           | Glutathione reductase (EC 1.8.1.7)                                                          | fig 439375.7.peg.2200                                                                   | fig 204722.5.peg.1023  |                       |
| Oxidative stress                          | Uncharacterized monothiol glutaredoxin ycf64-like                                           | fig 439375.7.peg.2522                                                                   | fig 204722.5.peg.846   |                       |
|                                           |                                                                                             | fig 439375.7.peg.3205,<br>fig 439375.7.peg.4871,                                        |                        |                       |
|                                           | Catalase (EC 1.11.1.6)                                                                      | fig 439375.7.peg.4882                                                                   | fig 204722.5.peg.2569  |                       |
|                                           | Ferroxidase (EC 1.16.3.1)                                                                   | fig 439375.7.peg.805                                                                    | fig 204722.5.peg.2185  |                       |
|                                           | Hydrogen peroxide-inducible genes activator                                                 | fig 439375.7.peg.3204,                                                                  | fig 204722.5.peg.2568, |                       |
|                                           | Iron-binding ferritin-like antioxidant protein                                              | fig 439375.7.peg.4000                                                                   | fig 204722.5.peg.2924  |                       |
|                                           |                                                                                             | fig 439375.7.peg.805                                                                    | fig 204722.5.peg.2185  |                       |
|                                           |                                                                                             |                                                                                         | fig 204722.5.peg.380,  |                       |
|                                           | Iron-responsive regulator Irr                                                               | fig 439375.7.peg.779                                                                    | fig 204722.5.peg.2211  |                       |
|                                           | Manganese superoxide dismutase (EC 1.15.1.1)                                                |                                                                                         | fig 204722.5.peg.583   |                       |
|                                           | NnrS protein involved in response to NO                                                     | fig 439375.7.peg.3048                                                                   | fig 204722.5.peg.2500  |                       |
|                                           | Non-specific DNA-binding protein Dps                                                        | fig 439375.7.peg.805                                                                    | fig 204722.5.peg.2185  |                       |
|                                           | Organic hydroperoxide resistance protein                                                    | fig 439375.7.peg.3447                                                                   | fig 204722.5.peg.3103  |                       |
|                                           | Organic hydroperoxide resistance transcriptional regulator                                  | fig 439375.7.peg.3446                                                                   | fig 204722.5.peg.3104  |                       |
|                                           | Peroxidase (EC 1.11.1.7)                                                                    | fig 439375.7.peg.4884                                                                   |                        |                       |
|                                           | Phytochrome, two-component sensor histidine kinase (EC 2.7.3.-)                             | fig 439375.7.peg.4635                                                                   |                        |                       |
|                                           | Redox-sensitive transcriptional activator SoxR                                              | fig 439375.7.peg.3098                                                                   |                        |                       |
|                                           | Superoxide dismutase [Cu-Zn] precursor (EC 1.15.1.1)                                        | fig 439375.7.peg.3995                                                                   | fig 204722.5.peg.2918  |                       |
|                                           | Superoxide dismutase [Fe] (EC 1.15.1.1)                                                     | fig 439375.7.peg.463,<br>fig 439375.7.peg.2849                                          |                        |                       |
|                                           |                                                                                             | fig 439375.7.peg.2776,<br>fig 439375.7.peg.3035,                                        | fig 204722.5.peg.667,  |                       |
| transcriptional regulator, Crp/Fnr family | fig 439375.7.peg.4910                                                                       | fig 204722.5.peg.2518                                                                   |                        |                       |
| Zinc uptake regulation protein ZUR        | fig 439375.7.peg.4350                                                                       | fig 204722.5.peg.3353                                                                   |                        |                       |
| Protection from Reactive Oxygen Species   |                                                                                             | fig 439375.7.peg.3205,<br>fig 439375.7.peg.4871,                                        |                        |                       |
|                                           | Catalase (EC 1.11.1.6)                                                                      | fig 439375.7.peg.4882                                                                   | fig 204722.5.peg.2569  |                       |
|                                           | Peroxidase (EC 1.11.1.7)                                                                    | fig 439375.7.peg.4884                                                                   |                        |                       |
|                                           | Manganese superoxide dismutase (EC 1.15.1.1)                                                |                                                                                         | fig 204722.5.peg.583   |                       |
|                                           | Superoxide dismutase [Cu-Zn] precursor (EC 1.15.1.1)                                        | fig 439375.7.peg.3995                                                                   | fig 204722.5.peg.2918  |                       |
|                                           | fig 439375.7.peg.463,                                                                       |                                                                                         |                        |                       |
|                                           | fig 439375.7.peg.2849                                                                       |                                                                                         |                        |                       |
| Periplasmic Stress                        | Periplasmic Stress Response                                                                 | fig 439375.7.peg.1898,                                                                  | fig 204722.5.peg.628,  |                       |
|                                           |                                                                                             | HtrA protease/chaperone protein                                                         | fig 439375.7.peg.2812  | fig 204722.5.peg.1419 |
|                                           |                                                                                             | Survival protein SurA precursor (Peptidyl-prolyl cis-trans isomerase SurA) (EC 5.2.1.8) | fig 439375.7.peg.2745  | fig 204722.5.peg.696  |
| Flavohaemoglobin                          | ABC-type Fe <sup>3+</sup> -siderophore transport system, permease 2 component               | fig 439375.7.peg.2967                                                                   |                        |                       |
|                                           | Chaperone protein DnaJ                                                                      | fig 439375.7.peg.832                                                                    | fig 204722.5.peg.2164  |                       |
|                                           | Chaperone protein DnaK                                                                      | fig 439375.7.peg.834                                                                    | fig 204722.5.peg.2163  |                       |
|                                           | Glutathione synthetase (EC 6.3.2.3)                                                         | fig 439375.7.peg.826                                                                    | fig 204722.5.peg.2169  |                       |
|                                           | Heat shock protein GrpE                                                                     | fig 439375.7.peg.191                                                                    | fig 204722.5.peg.178   |                       |
|                                           | Heat-inducible transcription repressor HrcA                                                 | fig 439375.7.peg.192                                                                    | fig 204722.5.peg.179   |                       |

|                                                                                                                                         |                                                            |                                                                            |                                                                            |                       |                       |
|-----------------------------------------------------------------------------------------------------------------------------------------|------------------------------------------------------------|----------------------------------------------------------------------------|----------------------------------------------------------------------------|-----------------------|-----------------------|
|                                                                                                                                         | <b>Stress Response</b>                                     | Heat shock dnaK gene cluster extended                                      | MiaB family protein, possibly involved in tRNA or rRNA modification        | fig 439375.7.peg.971  | fig 204722.5.peg.1967 |
|                                                                                                                                         |                                                            |                                                                            | Nucleoside 5-triphosphatase RdgB (dHATP, dITP, XTP-specific) (EC 3.6.1.15) | fig 439375.7.peg.195  | fig 204722.5.peg.183  |
| Radical SAM family enzyme, similar to coproporphyrinogen III oxidase, oxygen-independent, clustered with nucleoside-triphosphatase RdgB | fig 439375.7.peg.196                                       |                                                                            | fig 204722.5.peg.184                                                       |                       |                       |
| Ribonuclease PH (EC 2.7.7.56)                                                                                                           | fig 439375.7.peg.193                                       |                                                                            | fig 204722.5.peg.181                                                       |                       |                       |
| Ribosomal protein L11 methyltransferase (EC 2.1.1.-)                                                                                    | fig 439375.7.peg.1860                                      |                                                                            | fig 204722.5.peg.1443                                                      |                       |                       |
| Ribosomal RNA small subunit methyltransferase E (EC 2.1.1.-)                                                                            | fig 439375.7.peg.3150                                      |                                                                            | fig 204722.5.peg.2974                                                      |                       |                       |
| Ribosome-associated heat shock protein implicated in the recycling of the 50S subunit (S4 paralog)                                      | fig 439375.7.peg.1185                                      |                                                                            | fig 204722.5.peg.1795                                                      |                       |                       |
| RNA polymerase sigma factor RpoH                                                                                                        | fig 439375.7.peg.1293                                      |                                                                            | fig 204722.5.peg.1677                                                      |                       |                       |
| rRNA small subunit methyltransferase I                                                                                                  | fig 439375.7.peg.197                                       |                                                                            | fig 204722.5.peg.185                                                       |                       |                       |
| tmRNA-binding protein SmpB                                                                                                              | fig 439375.7.peg.2782                                      |                                                                            | fig 204722.5.peg.661                                                       |                       |                       |
| Translation elongation factor LepA                                                                                                      | fig 439375.7.peg.1406                                      |                                                                            | fig 204722.5.peg.3264                                                      |                       |                       |
| Hfl operon                                                                                                                              | GTP-binding protein HflX                                   |                                                                            | fig 439375.7.peg.2320                                                      | fig 204722.5.peg.1130 |                       |
|                                                                                                                                         | HflC protein                                               |                                                                            | fig 439375.7.peg.1896                                                      | fig 204722.5.peg.1421 |                       |
|                                                                                                                                         | HflK protein                                               |                                                                            | fig 439375.7.peg.1895                                                      | fig 204722.5.peg.1422 |                       |
|                                                                                                                                         | Putative inner membrane protein YjeT (clustered with HflC) | fig 439375.7.peg.1897                                                      | fig 204722.5.peg.1420                                                      |                       |                       |
|                                                                                                                                         | RNA-binding protein Hfq                                    | fig 439375.7.peg.2321                                                      | fig 204722.5.peg.1131                                                      |                       |                       |
| <b>Inorganic sulfur assimilation</b>                                                                                                    | Inorganic Sulfur Assimilation                              | 3&#39;(2&#39;);5&#39;-bisphosphate nucleotidase (EC 3.1.3.7)               | fig 439375.7.peg.214                                                       | fig 204722.5.peg.203  |                       |
|                                                                                                                                         |                                                            | 4Fe-4S ferredoxin, iron-sulfur binding                                     | fig 439375.7.peg.1186                                                      | fig 204722.5.peg.1793 |                       |
|                                                                                                                                         |                                                            | Adenylylsulfate kinase (EC 2.7.1.25)                                       | fig 439375.7.peg.213                                                       | fig 204722.5.peg.202  |                       |
|                                                                                                                                         |                                                            | Adenylyl-sulfate reductase [thioredoxin] (EC 1.8.4.10)                     | fig 439375.7.peg.202                                                       | fig 204722.5.peg.191  |                       |
|                                                                                                                                         |                                                            | Conserved hypothetical protein probably involved in sulfate reduction      | fig 439375.7.peg.200                                                       | fig 204722.5.peg.189  |                       |
|                                                                                                                                         |                                                            | <b>Ferredoxin</b>                                                          |                                                                            | fig 204722.5.peg.2596 |                       |
|                                                                                                                                         |                                                            | Ferredoxin--NADP(+) reductase (EC 1.18.1.2)                                | fig 439375.7.peg.462                                                       | fig 204722.5.peg.344  |                       |
|                                                                                                                                         |                                                            | Oxidoreductase probably involved in sulfite reduction                      | fig 439375.7.peg.203                                                       | fig 204722.5.peg.192  |                       |
|                                                                                                                                         |                                                            | Phosphoadenylyl-sulfate reductase [thioredoxin] (EC 1.8.4.8)               | fig 439375.7.peg.202                                                       | fig 204722.5.peg.191  |                       |
|                                                                                                                                         |                                                            | Sulfate adenylyltransferase subunit 1 (EC 2.7.7.4)                         | fig 439375.7.peg.213                                                       | fig 204722.5.peg.202  |                       |
|                                                                                                                                         |                                                            | Sulfate adenylyltransferase subunit 2 (EC 2.7.7.4)                         | fig 439375.7.peg.212                                                       | fig 204722.5.peg.201  |                       |
|                                                                                                                                         |                                                            |                                                                            | fig 439375.7.peg.127,                                                      | fig 204722.5.peg.111, |                       |
|                                                                                                                                         |                                                            | Sulfate and thiosulfate binding protein CysP                               | fig 439375.7.peg.1954                                                      | fig 204722.5.peg.1355 |                       |
|                                                                                                                                         |                                                            | Sulfate and thiosulfate import ATP-binding protein CysA (EC 3.6.3.25)      | fig 439375.7.peg.130                                                       | fig 204722.5.peg.114  |                       |
|                                                                                                                                         |                                                            |                                                                            | fig 439375.7.peg.128,                                                      | fig 204722.5.peg.112, |                       |
|                                                                                                                                         |                                                            | Sulfate transport system permease protein CysT                             | fig 439375.7.peg.1955                                                      | fig 204722.5.peg.1353 |                       |
|                                                                                                                                         |                                                            |                                                                            | fig 439375.7.peg.129,                                                      | fig 204722.5.peg.113, |                       |
|                                                                                                                                         |                                                            | Sulfate transport system permease protein CysW                             | fig 439375.7.peg.1956                                                      | fig 204722.5.peg.1352 |                       |
|                                                                                                                                         |                                                            | <b>Sulfite reductase [NADPH] flavoprotein alpha-component (EC 1.8.1.2)</b> |                                                                            | fig 204722.5.peg.2451 |                       |
|                                                                                                                                         |                                                            | Sulfite reductase [NADPH] hemoprotein beta-component (EC 1.8.1.2)          | fig 439375.7.peg.201                                                       | fig 204722.5.peg.190  |                       |

Sulfur Metabolism

|                                                                |                                                                                    |                                                                                    |                                                                     |                      |                                             |
|----------------------------------------------------------------|------------------------------------------------------------------------------------|------------------------------------------------------------------------------------|---------------------------------------------------------------------|----------------------|---------------------------------------------|
| <b>Organic sulfur assimilation</b>                             | Alkanesulfonate assimilation                                                       | ABC-type nitrate/sulfonate/bicarbonatone transport system, ATPase component        | fig 439375.7.p.3670,<br>fig 439375.7.p.3751,<br>fig 439375.7.p.4038 |                      |                                             |
|                                                                |                                                                                    | ABC-type nitrate/sulfonate/bicarbonatone transport system, permease component      | fig 439375.7.p.3671                                                 |                      |                                             |
|                                                                |                                                                                    | ABC-type nitrate/sulfonate/bicarbonatone transport systems, periplasmic components | fig 439375.7.p.3669                                                 |                      |                                             |
|                                                                |                                                                                    | FMN reductase (EC 1.5.1.29)                                                        | fig 439375.7.p.4181                                                 |                      |                                             |
|                                                                |                                                                                    | Taurine Utilization                                                                | Taurine transport ATP-binding protein TauB                          | fig 439375.7.p.3663  |                                             |
|                                                                |                                                                                    | Taurine transport system permease protein TauC                                     | fig 439375.7.p.3662                                                 |                      |                                             |
|                                                                |                                                                                    | Taurine-binding periplasmic protein TauA                                           | fig 439375.7.p.3664                                                 |                      |                                             |
|                                                                | <b>Sulfur Metabolism</b>                                                           | Thioredoxin-disulfide reductase                                                    | Alkyl hydroperoxide reductase protein C (EC 1.6.4.-)                | fig 439375.7.p.3999  | fig 204722.5.p.2923                         |
|                                                                |                                                                                    |                                                                                    | Alkylhydroperoxidase protein D                                      | fig 439375.7.p.3998  | fig 204722.5.p.2922                         |
|                                                                |                                                                                    |                                                                                    | Hydrogen peroxide-inducible genes activator                         | fig 439375.7.p.4000  | fig 204722.5.p.2568,<br>fig 204722.5.p.2924 |
| Thiol peroxidase, Bcp-type (EC 1.11.1.15)                      |                                                                                    |                                                                                    | fig 439375.7.p.2380                                                 | fig 204722.5.p.939   |                                             |
|                                                                |                                                                                    |                                                                                    | fig 439375.7.p.1754,<br>fig 439375.7.p.2219,                        | fig 204722.5.p.1039, |                                             |
| Thioredoxin reductase (EC 1.8.1.9)                             |                                                                                    |                                                                                    | fig 439375.7.p.3745                                                 | fig 204722.5.p.1525  |                                             |
| <b>Adhesion</b>                                                | Widespread colonization island                                                     | Flp pilus assembly protein CpaD                                                    | fig 439375.7.p.764                                                  |                      |                                             |
|                                                                |                                                                                    | Flp pilus assembly protein RcpC/CpaB                                               | fig 439375.7.p.761                                                  |                      |                                             |
|                                                                |                                                                                    | Flp pilus assembly protein TadB                                                    | fig 439375.7.p.767                                                  |                      |                                             |
|                                                                |                                                                                    | Flp pilus assembly protein TadD, contains TPR repeat                               | fig 439375.7.p.769                                                  |                      |                                             |
|                                                                |                                                                                    | Flp pilus assembly protein, pilin Flp                                              | fig 439375.7.p.2622                                                 |                      |                                             |
|                                                                |                                                                                    | Similar to secretin RcpA/CpaC, associated with Flp pilus assembly                  | fig 439375.7.p.757                                                  |                      |                                             |
|                                                                |                                                                                    | Similar to TadZ/CpaE, associated with Flp pilus assembly                           | fig 439375.7.p.756                                                  |                      |                                             |
|                                                                |                                                                                    | Type II/IV secretion system ATP hydrolase                                          |                                                                     |                      |                                             |
|                                                                |                                                                                    | TadA/VirB11/CpaF, TadA subfamily                                                   | fig 439375.7.p.766                                                  |                      |                                             |
|                                                                |                                                                                    | Type II/IV secretion system ATPase TadZ/CpaE, associated with Flp pilus assembly   | fig 439375.7.p.765                                                  |                      |                                             |
|                                                                | Type II/IV secretion system protein TadC, associated with Flp pilus assembly       | fig 439375.7.p.768                                                                 |                                                                     |                      |                                             |
|                                                                | Type II/IV secretion system secretin RcpA/CpaC, associated with Flp pilus assembly | fig 439375.7.p.763                                                                 |                                                                     |                      |                                             |
|                                                                | Type IV prepilin peptidase TadV/CpaA                                               | fig 439375.7.p.760                                                                 |                                                                     |                      |                                             |
|                                                                | Heme, hemin uptake and utilization systems in GramPositives                        | Hemin transport protein HmuS                                                       | fig 439375.7.p.3782                                                 |                      |                                             |
|                                                                |                                                                                    | Hypothetical, distant similarity with heme-degrading oxygenase IsdG                | fig 439375.7.p.3785                                                 | fig 204722.5.p.2779  |                                             |
| Iron compound ABC uptake transporter substrate-binding protein |                                                                                    | fig 439375.7.p.3962                                                                | fig 204722.5.p.2887                                                 |                      |                                             |
| Similar to hypothetical protein DUF454                         |                                                                                    | fig 439375.7.p.817                                                                 | fig 204722.5.p.2174                                                 |                      |                                             |
| Hemin transport system                                         |                                                                                    | ABC-type hemin transport system, ATPase component                                  | fig 439375.7.p.3779                                                 |                      |                                             |
|                                                                |                                                                                    | Hemin ABC transporter, permease protein                                            | fig 439375.7.p.3780                                                 |                      |                                             |
|                                                                |                                                                                    | Hemin transport protein HmuS                                                       | fig 439375.7.p.3782                                                 |                      |                                             |
|                                                                | Outer membrane receptor proteins, mostly Fe transport                              | fig 439375.7.p.4261                                                                |                                                                     |                      |                                             |
| Periplasmic hemin-binding protein                              | fig 439375.7.p.3781                                                                |                                                                                    |                                                                     |                      |                                             |
| TonB-dependent hemin , ferrichrome receptor                    | fig 439375.7.p.3784                                                                |                                                                                    |                                                                     |                      |                                             |

**Iron Scavenging Mechanisms**

|                                                           |                                                                                                                   |                                                                                                                                                        |                                                |  |
|-----------------------------------------------------------|-------------------------------------------------------------------------------------------------------------------|--------------------------------------------------------------------------------------------------------------------------------------------------------|------------------------------------------------|--|
| Siderophore Aerobactin                                    | Citrate:6-N-acetyl-6-N-hydroxy-L-lysine ligase, alpha subunit (EC 6.3.2.27), aerobactin biosynthesis protein lucA | fig 439375.7.peg.3412,<br>fig 439375.7.peg.3414                                                                                                        |                                                |  |
|                                                           | Ferric hydroxamate ABC transporter (TC 3.A.1.14.3), ATP-binding protein FhuC                                      | fig 439375.7.peg.3635                                                                                                                                  |                                                |  |
|                                                           | Ferric hydroxamate ABC transporter (TC 3.A.1.14.3), permease component FhuB                                       | fig 439375.7.peg.2917                                                                                                                                  |                                                |  |
|                                                           | Ferric hydroxamate outer membrane receptor FhuA                                                                   | fig 439375.7.peg.4304                                                                                                                                  |                                                |  |
|                                                           | L-lysine 6-monooxygenase [NADPH] (EC 1.14.13.59), aerobactin biosynthesis protein lucD                            | fig 439375.7.peg.3411                                                                                                                                  |                                                |  |
|                                                           | N6-hydroxylysine O-acetyltransferase (EC 2.3.1.102), aerobactin biosynthesis protein lucB                         | fig 439375.7.peg.3413                                                                                                                                  |                                                |  |
|                                                           | Siderophore assembly kit                                                                                          | ABC-type Fe3+-siderophore transport system, permease 2 component                                                                                       | fig 439375.7.peg.2967                          |  |
|                                                           |                                                                                                                   | ABC-type Fe3+-siderophore transport system, permease component                                                                                         | fig 439375.7.peg.2968                          |  |
|                                                           |                                                                                                                   | ABC-type hemin transport system, ATPase component                                                                                                      | fig 439375.7.peg.3779                          |  |
|                                                           |                                                                                                                   | Ferric hydroxamate ABC transporter (TC 3.A.1.14.3), ATP-binding protein FhuC                                                                           | fig 439375.7.peg.3635                          |  |
|                                                           |                                                                                                                   | Ferric hydroxamate ABC transporter (TC 3.A.1.14.3), permease component FhuB                                                                            | fig 439375.7.peg.2917                          |  |
|                                                           |                                                                                                                   | Ferric hydroxamate outer membrane receptor FhuA                                                                                                        | fig 439375.7.peg.4304                          |  |
|                                                           |                                                                                                                   | Ferric reductase (1.6.99.14)                                                                                                                           | fig 439375.7.peg.4305                          |  |
|                                                           |                                                                                                                   | Hemin ABC transporter, permease protein                                                                                                                | fig 439375.7.peg.3780                          |  |
| Hemin transport protein HmuS                              |                                                                                                                   | fig 439375.7.peg.3782                                                                                                                                  |                                                |  |
| Periplasmic hemin-binding protein                         |                                                                                                                   | fig 439375.7.peg.3781                                                                                                                                  |                                                |  |
| Siderophore biosynthesis protein, monooxygenase           |                                                                                                                   | fig 439375.7.peg.3411                                                                                                                                  |                                                |  |
| Siderophore synthetase component, ligase                  |                                                                                                                   | fig 439375.7.peg.3412                                                                                                                                  |                                                |  |
| Siderophore synthetase large component, acetyltransferase |                                                                                                                   | fig 439375.7.peg.3414                                                                                                                                  |                                                |  |
| Siderophore synthetase small component, acetyltransferase |                                                                                                                   | fig 439375.7.peg.3413                                                                                                                                  |                                                |  |
| TonB-dependent hemin , ferrichrome receptor               | fig 439375.7.peg.3784                                                                                             |                                                                                                                                                        |                                                |  |
| Arsenic resistance                                        |                                                                                                                   | fig 439375.7.peg.346,<br>fig 439375.7.peg.2308,<br>fig 439375.7.peg.3354,<br>fig 439375.7.peg.3355,<br>fig 439375.7.peg.4857,<br>fig 439375.7.peg.4931 | fig 204722.5.peg.259,<br>fig 204722.5.peg.1001 |  |
|                                                           | Arsenate reductase (EC 1.20.4.1)                                                                                  | fig 439375.7.peg.4931                                                                                                                                  |                                                |  |
|                                                           | Arsenic resistance protein ArsH                                                                                   | fig 439375.7.peg.3352                                                                                                                                  |                                                |  |
|                                                           | Arsenical-resistance protein ACR3                                                                                 | fig 439375.7.peg.3353                                                                                                                                  |                                                |  |
| Beta-lactamase                                            | Beta-lactamase (EC 3.5.2.6)                                                                                       | fig 439375.7.peg.2724                                                                                                                                  |                                                |  |
|                                                           | Beta-lactamase class C and other penicillin binding proteins                                                      | fig 439375.7.peg.3243,<br>fig 439375.7.peg.3280                                                                                                        |                                                |  |
|                                                           | Metal-dependent hydrolases of the beta-lactamase superfamily I                                                    | fig 439375.7.peg.2187                                                                                                                                  | fig 204722.5.peg.1009                          |  |
|                                                           | Cobalt-zinc-cadmium resistance protein                                                                            | fig 439375.7.peg.1684,<br>fig 439375.7.peg.3086                                                                                                        | fig 204722.5.peg.1594                          |  |

## Virulence

## Resistance to antibiotics and toxic compounds

|                                   |                                                                              |                                                                                                                                                                                                                                                            |                                                |  |
|-----------------------------------|------------------------------------------------------------------------------|------------------------------------------------------------------------------------------------------------------------------------------------------------------------------------------------------------------------------------------------------------|------------------------------------------------|--|
| Cobalt-zinc-cadmium resistance    |                                                                              | fig 439375.7.peg.3362,<br>fig 439375.7.peg.3380,<br>fig 439375.7.peg.3389,<br>fig 439375.7.peg.4113                                                                                                                                                        | fig 204722.5.peg.513                           |  |
|                                   | Cobalt-zinc-cadmium resistance protein CzcD                                  | fig 439375.7.peg.2811                                                                                                                                                                                                                                      | fig 204722.5.peg.629                           |  |
|                                   | DNA-binding heavy metal response regulator                                   | fig 439375.7.peg.3307                                                                                                                                                                                                                                      |                                                |  |
|                                   | Heavy metal resistance transcriptional regulator HmrR                        | fig 439375.7.peg.364,<br>fig 439375.7.peg.4228                                                                                                                                                                                                             | fig 204722.5.peg.289                           |  |
|                                   | Probable Co/Zn/Cd efflux system membrane fusion protein                      | fig 439375.7.peg.317,<br>fig 439375.7.peg.965,<br>fig 204722.5.peg.228,<br>fig 439375.7.peg.2650,<br>fig 204722.5.peg.789,<br>fig 439375.7.peg.3364                                                                                                        | fig 204722.5.peg.2052                          |  |
|                                   | Transcriptional regulator, MerR family                                       | fig 439375.7.peg.3996                                                                                                                                                                                                                                      | fig 204722.5.peg.2919                          |  |
|                                   | Blue copper oxidase CueO precursor                                           | fig 439375.7.peg.2667,<br>fig 439375.7.peg.3386                                                                                                                                                                                                            |                                                |  |
| Copper homeostasis                | CopG protein                                                                 | fig 439375.7.peg.2362,<br>fig 439375.7.peg.3383,<br>fig 439375.7.peg.3398,<br>fig 439375.7.peg.4224                                                                                                                                                        | fig 204722.5.peg.956                           |  |
|                                   | Copper chaperone                                                             | fig 439375.7.peg.307,<br>fig 439375.7.peg.493,<br>fig 439375.7.peg.966,<br>fig 439375.7.peg.3363,<br>fig 439375.7.peg.3388,<br>fig 439375.7.peg.3397,<br>fig 204722.5.peg.227,<br>fig 439375.7.peg.4792,<br>fig 204722.5.peg.373,<br>fig 439375.7.peg.4922 | fig 204722.5.peg.2053                          |  |
|                                   | Copper-translocating P-type ATPase (EC 3.6.3.4)                              | fig 439375.7.peg.3394                                                                                                                                                                                                                                      |                                                |  |
|                                   | Cu(I)-responsive transcriptional regulator                                   | fig 439375.7.peg.2814                                                                                                                                                                                                                                      | fig 204722.5.peg.626                           |  |
|                                   | Cytochrome c heme lyase subunit CcmF                                         | fig 439375.7.peg.2816                                                                                                                                                                                                                                      | fig 204722.5.peg.624                           |  |
|                                   | Cytochrome c heme lyase subunit CcmH                                         | fig 439375.7.peg.3390                                                                                                                                                                                                                                      |                                                |  |
|                                   | Multicopper oxidase                                                          |                                                                                                                                                                                                                                                            |                                                |  |
|                                   | Fosfomycin resistance                                                        | Fosfomycin resistance protein FosX                                                                                                                                                                                                                         | fig 204722.5.peg.2794                          |  |
|                                   | Mercury resistance operon                                                    | Mercuric ion reductase (EC 1.16.1.1)                                                                                                                                                                                                                       | fig 439375.7.peg.3312                          |  |
|                                   |                                                                              | Periplasmic mercury(+2) binding protein                                                                                                                                                                                                                    | fig 439375.7.peg.3309                          |  |
| Multidrug Resistance Efflux Pumps |                                                                              | fig 439375.7.peg.365,<br>fig 439375.7.peg.2283,<br>fig 439375.7.peg.3023,<br>fig 204722.5.peg.290,<br>fig 439375.7.peg.4229                                                                                                                                | fig 204722.5.peg.1109                          |  |
|                                   | Acriflavin resistance protein                                                | fig 439375.7.peg.1318,<br>fig 204722.5.peg.1697,<br>fig 439375.7.peg.3717                                                                                                                                                                                  | fig 204722.5.peg.1698                          |  |
|                                   | Macrolide export ATP-binding/permease protein MacB (EC 3.6.3.-)              | fig 439375.7.peg.1319,<br>fig 439375.7.peg.3718                                                                                                                                                                                                            | fig 204722.5.peg.1699                          |  |
|                                   | Macrolide-specific efflux protein MacA                                       |                                                                                                                                                                                                                                                            |                                                |  |
|                                   | Membrane fusion protein of RND family multidrug efflux pump                  | fig 439375.7.peg.399                                                                                                                                                                                                                                       |                                                |  |
|                                   | Multidrug-efflux transporter, major facilitator superfamily (MFS) (TC 2.A.1) |                                                                                                                                                                                                                                                            | fig 204722.5.peg.2989                          |  |
|                                   | RND efflux system, inner membrane transporter CmeB                           | fig 439375.7.peg.400,<br>fig 439375.7.peg.2568                                                                                                                                                                                                             | fig 204722.5.peg.305,<br>fig 204722.5.peg.2549 |  |

|                                                    |                                                         |                                                                                                               |                                                                                                         |                                                                           |                                                 |
|----------------------------------------------------|---------------------------------------------------------|---------------------------------------------------------------------------------------------------------------|---------------------------------------------------------------------------------------------------------|---------------------------------------------------------------------------|-------------------------------------------------|
|                                                    |                                                         | RND efflux system, membrane fusion protein CmeA                                                               | fig 439375.7.peg.2569,<br>fig 439375.7.peg.3024                                                         | fig 204722.5.peg.304,<br>fig 204722.5.peg.2550                            |                                                 |
|                                                    |                                                         | Transcription repressor of multidrug efflux pump acrAB operon, TetR (AcrR) family                             | fig 439375.7.peg.398                                                                                    | fig 204722.5.peg.303                                                      |                                                 |
|                                                    |                                                         | Type I secretion outer membrane protein, TolC precursor                                                       | fig 439375.7.peg.2359                                                                                   | fig 204722.5.peg.959                                                      |                                                 |
|                                                    | Resistance to fluoroquinolones                          | DNA gyrase subunit A (EC 5.99.1.3)                                                                            | fig 439375.7.peg.2292                                                                                   | fig 204722.5.peg.1118                                                     |                                                 |
|                                                    |                                                         | DNA gyrase subunit B (EC 5.99.1.3)                                                                            | fig 439375.7.peg.148                                                                                    | fig 204722.5.peg.129                                                      |                                                 |
|                                                    |                                                         | Topoisomerase IV subunit A (EC 5.99.1.-)                                                                      | fig 439375.7.peg.2673                                                                                   | fig 204722.5.peg.767                                                      |                                                 |
|                                                    |                                                         | Topoisomerase IV subunit B (EC 5.99.1.-)                                                                      | fig 439375.7.peg.3819                                                                                   | fig 204722.5.peg.2807                                                     |                                                 |
|                                                    |                                                         |                                                                                                               |                                                                                                         |                                                                           |                                                 |
| Type III, Type IV, Type VI, ESAT secretion systems | Type 4 secretion and conjugative transfer               | Conjugative transfer protein TrbB                                                                             | fig 439375.7.peg.3367                                                                                   |                                                                           |                                                 |
|                                                    |                                                         | Conjugative transfer protein TrbC                                                                             | fig 439375.7.peg.3368                                                                                   |                                                                           |                                                 |
|                                                    |                                                         | Conjugative transfer protein TrbD                                                                             | fig 439375.7.peg.3369                                                                                   |                                                                           |                                                 |
|                                                    |                                                         | Conjugative transfer protein TrbE                                                                             | fig 439375.7.peg.3370                                                                                   |                                                                           |                                                 |
|                                                    |                                                         | Conjugative transfer protein TrbF                                                                             | fig 439375.7.peg.3374                                                                                   |                                                                           |                                                 |
|                                                    |                                                         | Conjugative transfer protein TrbG                                                                             | fig 439375.7.peg.3375                                                                                   |                                                                           |                                                 |
|                                                    |                                                         | Conjugative transfer protein TrbI                                                                             | fig 439375.7.peg.3376                                                                                   |                                                                           |                                                 |
|                                                    |                                                         | Conjugative transfer protein TrbJ                                                                             | fig 439375.7.peg.3371                                                                                   |                                                                           |                                                 |
|                                                    |                                                         | Conjugative transfer protein TrbL                                                                             | fig 439375.7.peg.3373                                                                                   |                                                                           |                                                 |
|                                                    |                                                         | IncQ plasmid conjugative transfer protein TraG                                                                | fig 439375.7.peg.715                                                                                    |                                                                           |                                                 |
|                                                    |                                                         | Outer membrane and periplasm component of type IV secretion of T-DNA complex, has secretin-like domain, VirB9 | fig 439375.7.peg.719                                                                                    |                                                                           |                                                 |
|                                                    |                                                         | Ync                                                                                                           | fig 439375.7.peg.4852                                                                                   |                                                                           |                                                 |
|                                                    |                                                         | Ynd                                                                                                           | fig 439375.7.peg.4853                                                                                   |                                                                           |                                                 |
| Virulence                                          | Siderophore Enterobactin                                | Ferric enterobactin transport ATP-binding protein FepC (TC 3.A.1.14.2)                                        | fig 439375.7.peg.4259                                                                                   |                                                                           |                                                 |
|                                                    |                                                         | Ferric enterobactin transport system permease protein FepG (TC 3.A.1.14.2)                                    | fig 439375.7.peg.4256                                                                                   |                                                                           |                                                 |
|                                                    |                                                         | Ferric enterobactin-binding periplasmic protein FepB (TC 3.A.1.14.2)                                          | fig 439375.7.peg.4258                                                                                   |                                                                           |                                                 |
|                                                    |                                                         |                                                                                                               | 4-hydroxybenzoyl-CoA thioesterase family active site                                                    | fig 439375.7.peg.1269                                                     | fig 204722.5.peg.1728                           |
|                                                    |                                                         |                                                                                                               | Biopolymer transport protein ExbD/TolR                                                                  | fig 439375.7.peg.1271,<br>fig 439375.7.peg.1315                           | fig 204722.5.peg.1694,<br>fig 204722.5.peg.1726 |
|                                                    |                                                         |                                                                                                               | iron-chelator utilization protein                                                                       | fig 439375.7.peg.2001                                                     |                                                 |
|                                                    |                                                         |                                                                                                               | MotA/TolQ/ExbB proton channel family protein                                                            | fig 439375.7.peg.1270,<br>fig 439375.7.peg.1314                           | fig 204722.5.peg.1693,<br>fig 204722.5.peg.1727 |
|                                                    |                                                         |                                                                                                               | Outer membrane lipoprotein omp16 precursor                                                              | fig 439375.7.peg.1275                                                     | fig 204722.5.peg.1722                           |
|                                                    |                                                         |                                                                                                               | Protein-L-isoaspartate O-methyltransferase (EC 2.1.1.77)                                                | fig 439375.7.peg.2360,<br>fig 439375.7.peg.2470,<br>fig 439375.7.peg.4461 | fig 204722.5.peg.898,<br>fig 204722.5.peg.958   |
|                                                    |                                                         | Ton and Tol transport systems                                                                                 | TolA protein                                                                                            | fig 439375.7.peg.1272                                                     | fig 204722.5.peg.1725                           |
|                                                    |                                                         |                                                                                                               | tolB protein precursor, periplasmic protein involved in the tonb-independent uptake of group A colicins | fig 439375.7.peg.1273                                                     | fig 204722.5.peg.1724                           |
|                                                    |                                                         |                                                                                                               | TonB-dependent hemin , ferrichrome receptor                                                             | fig 439375.7.peg.3784                                                     |                                                 |
|                                                    |                                                         |                                                                                                               |                                                                                                         | fig 439375.7.peg.1316,<br>fig 439375.7.peg.3418,                          |                                                 |
|                                                    |                                                         |                                                                                                               | TonB-dependent receptor                                                                                 | fig 439375.7.peg.3960                                                     | fig 204722.5.peg.1695                           |
|                                                    |                                                         |                                                                                                               | TPR repeat containing exported protein                                                                  | fig 439375.7.peg.1276                                                     | fig 204722.5.peg.1720                           |
|                                                    | Type I secretion outer membrane protein, TolC precursor |                                                                                                               | fig 439375.7.peg.2359                                                                                   | fig 204722.5.peg.959                                                      |                                                 |

**Table S4. Genes in genomic regions that are unique to the genus *Brucella*.**

| Region               | Other identifier | Accession Number | PATRIC Locus Tag     | RefSeq Locus Tag | Start   | End     | Length | Strand               | AA Length | Gene Symbol | Product                                                                     | Size (nt) |
|----------------------|------------------|------------------|----------------------|------------------|---------|---------|--------|----------------------|-----------|-------------|-----------------------------------------------------------------------------|-----------|
| 1                    | GIBs2            | NC_004310        | VBIBruSui107850_0600 | BR0584           | 578022  | 578534  | 513    | -                    | 170       |             | hypothetical protein                                                        | 11674     |
|                      |                  |                  | VBIBruSui107850_0601 | BR0585           | 578497  | 579732  | 1236   | -                    | 411       |             | Phage DNA Packaging Protein                                                 |           |
|                      |                  |                  | VBIBruSui107850_0602 | BR0586           | 579764  | 580957  | 1194   | -                    | 397       |             | Phage portal protein                                                        |           |
|                      |                  |                  | VBIBruSui107850_0603 | BR0587           | 580954  | 581331  | 378    | -                    | 125       |             | hypothetical protein                                                        |           |
|                      |                  |                  | VBIBruSui107850_0604 | BR0588           | 581318  | 581986  | 669    | -                    | 222       |             | Phage prohead protease, HK97 family                                         |           |
|                      |                  |                  | VBIBruSui107850_0605 | BR0589           | 582008  | 583282  | 1275   | -                    | 424       |             | Phage major capsid protein                                                  |           |
|                      |                  |                  | VBIBruSui107850_0606 | BR0590           | 583453  | 584013  | 561    | -                    | 186       |             | homologue of Rhodobacter capsulatus gene transfer agent (GTA) orfg6         |           |
|                      |                  |                  | VBIBruSui107850_0607 | BR0591           | 584010  | 584348  | 339    | -                    | 112       |             | hypothetical protein                                                        |           |
|                      |                  |                  | VBIBruSui107850_0608 | BR0592           | 584345  | 584512  | 168    | -                    | 55        |             | hypothetical protein                                                        |           |
|                      |                  |                  | VBIBruSui107850_0609 | BR0593           | 584472  | 584879  | 408    | -                    | 135       |             | Gene Transfer Agent (GTA) ORFG08                                            |           |
|                      |                  |                  | VBIBruSui107850_0610 | BR0594           | 584920  | 585333  | 414    | -                    | 137       |             | Gene Transfer Agent (GTA) ORFG09                                            |           |
|                      |                  |                  | VBIBruSui107850_0611 | BR0595           | 585330  | 585671  | 342    | -                    | 113       |             | Gene Transfer Agent (GTA) ORFG10                                            |           |
|                      |                  |                  | VBIBruSui107850_0612 |                  | 585715  | 585885  | 171    | -                    | 56        |             | hypothetical protein                                                        |           |
|                      |                  |                  | VBIBruSui107850_0613 | BR0597           | 585890  | 586435  | 546    | -                    | 181       |             | Gene Transfer Agent (GTA) ORFG11                                            |           |
|                      |                  |                  | VBIBruSui107850_0614 | BR0585           | 586438  | 587070  | 633    | -                    | 210       |             | Gene Transfer Agent (GTA) ORFG12                                            |           |
|                      |                  |                  | VBIBruSui107850_0615 | BR0599           | 587067  | 587942  | 876    | -                    | 291       |             | FAD/FMN-containing dehydrogenases                                           |           |
|                      |                  |                  | VBIBruSui107850_0616 | BR0600           | 587939  | 588373  | 435    | -                    | 144       |             | NLP/P60 family protein                                                      |           |
| VBIBruSui107850_0617 |                  | 588377           | 589696               | 1320             | -       | 439     |        | hypothetical protein |           |             |                                                                             |           |
| 2                    |                  | NC_004310        | VBIBruSui107850_1073 | BR1059           | 1029023 | 1030564 | 1542   | +                    | 513       |             | Multidrug resistance protein B                                              | 4018      |
|                      |                  |                  | VBIBruSui107850_1074 | BR1060           | 1030564 | 1031664 | 1101   | +                    | 366       |             | Multidrug resistance protein A                                              |           |
|                      |                  |                  | VBIBruSui107850_1075 | BR1061           | 1032058 | 1033041 | 984    | -                    | 327       |             | Alcohol dehydrogenase                                                       |           |
| 3                    |                  | NC_004310        | VBIBruSui107850_1377 |                  | 1316762 | 1316911 | 150    | -                    | 49        |             | hypothetical protein                                                        | 13038     |
|                      |                  |                  | VBIBruSui107850_1378 | BR1356           | 1317048 | 1317308 | 261    | -                    | 86        | <i>ureA</i> | Urease gamma subunit                                                        |           |
|                      |                  |                  | VBIBruSui107850_1379 | BR1357           | 1317357 | 1317836 | 480    | -                    | 159       | <i>ureB</i> | Urease beta subunit                                                         |           |
|                      |                  |                  | VBIBruSui107850_1380 | BR1358           | 1317876 | 1319597 | 1722   | -                    | 573       | <i>ureC</i> | Urease alpha subunit                                                        |           |
|                      |                  |                  | VBIBruSui107850_1381 | BR1359           | 1319645 | 1320250 | 606    | -                    | 201       | <i>ureE</i> | Urease accessory protein UreE                                               |           |
|                      |                  |                  | VBIBruSui107850_1382 | BR1360           | 1320222 | 1320953 | 732    | -                    | 243       | <i>ureF</i> | Urease accessory protein UreF                                               |           |
|                      |                  |                  | VBIBruSui107850_1383 | BR1361           | 1320969 | 1321607 | 639    | -                    | 212       | <i>ureG</i> | Urease accessory protein UreG                                               |           |
|                      |                  |                  | VBIBruSui107850_1384 | BR1362           | 1321607 | 1322515 | 909    | -                    | 302       | <i>ureD</i> | Urease accessory protein UreD                                               |           |
|                      |                  |                  | VBIBruSui107850_1385 | BR1363           | 1322525 | 1323577 | 1053   | -                    | 350       |             | Eukaryotic-type low-affinity urea transporter                               |           |
|                      |                  |                  | VBIBruSui107850_1386 | BR1364           | 1323604 | 1324362 | 759    | -                    | 252       | <i>nikK</i> | Additional periplasmic component NikK of nickel ECF transporter             |           |
|                      |                  |                  | VBIBruSui107850_1387 | BR1365           | 1324382 | 1325017 | 636    | -                    | 211       | <i>nikM</i> | Substrate-specific component NikM of nickel ECF transporter                 |           |
|                      |                  |                  | VBIBruSui107850_1388 | BR1366           | 1325014 | 1325640 | 627    | -                    | 208       | <i>nikL</i> | Additional component NikL of nickel ECF transporter                         |           |
|                      |                  |                  | VBIBruSui107850_1389 | BR1367           | 1325637 | 1326401 | 765    | -                    | 254       | <i>nikQ</i> | Transmembrane component NikQ of energizing module of nickel ECF transporter |           |
|                      |                  |                  | VBIBruSui107850_1390 | BR1368           | 1326398 | 1327117 | 720    | -                    | 239       | <i>nikO</i> | ATPase component NikO of energizing module of nickel ECF transporter        |           |
|                      |                  |                  | VBIBruSui107850_1391 |                  | 1327138 | 1327950 | 813    | +                    | 270       |             | Putative membrane protein precursor                                         |           |
|                      |                  |                  | VBIBruSui107850_1392 |                  | 1327963 | 1328334 | 372    | +                    | 123       |             | INTEGRAL MEMBRANE PROTEIN                                                   |           |
|                      |                  |                  | VBIBruSui107850_1393 | BR1371           | 1328843 | 1329646 | 804    | -                    | 267       |             | hypothetical protein                                                        |           |
| VBIBruSui107850_1394 |                  | 1329657          | 1329800              | 144              | -       | 47      |        | hypothetical protein |           |             |                                                                             |           |
| 4                    | SAR 1-14         |                  | VBIBruSui107850_1648 | BR1620           | 1566008 | 1567765 | 1758   | -                    | 585       |             | hypothetical protein                                                        |           |

|   |      |           |                      |         |         |         |      |   |     |              |                                                                                        |       |
|---|------|-----------|----------------------|---------|---------|---------|------|---|-----|--------------|----------------------------------------------------------------------------------------|-------|
|   |      | NC_004310 | VBIBruSui107850_1649 | BR1621  | 1567793 | 1568395 | 603  | - | 200 | <i>marC</i>  | Multiple antibiotic resistance protein <i>marC</i>                                     |       |
|   |      |           | VBIBruSui107850_1650 | BR1622  | 1568698 | 1569459 | 762  | - | 253 | <i>omp31</i> | Outer membrane protein                                                                 | 5972  |
|   |      |           | VBIBruSui107850_1651 | BR1623  | 1569596 | 1570939 | 1344 | + | 447 |              | Patatin-like phospholipase domain precursor                                            |       |
|   |      |           | VBIBruSui107850_1652 | BR1625  | 1571447 | 1571548 | 102  | + | 33  |              | hypothetical protein                                                                   |       |
|   |      |           | VBIBruSui107850_1653 | BR1626  | 1571699 | 1571980 | 282  | - | 93  |              | hypothetical protein                                                                   |       |
| 5 |      |           | VBIBruSui107850_2234 | BRA0012 | 9684    | 10409   | 726  | + | 241 |              | 4'-phosphopantetheinyl transferase <i>entD</i> ; Holo-[acyl-carrier protein] synthase, |       |
|   |      |           | VBIBruSui107850_2235 | BRA0013 | 10399   | 11175   | 777  | + | 258 | <i>entA</i>  | 2,3-dihydro-2,3-dihydroxybenzoate dehydrogenase                                        | 6797  |
|   |      |           | VBIBruSui107850_2236 | BRA0014 | 11175   | 12047   | 873  | + | 290 | <i>entB</i>  | Isochorismatase of siderophore biosynthesis                                            |       |
|   |      |           | VBIBruSui107850_2237 | BRA0015 | 12099   | 13718   | 1620 | + | 539 | <i>entE</i>  | 2,3-dihydroxybenzoate-AMP ligase                                                       |       |
|   |      |           | VBIBruSui107850_2238 | BRA0016 | 13825   | 14892   | 1068 | + | 355 | <i>entC</i>  | Isochorismate synthase of siderophore biosynthesis                                     |       |
|   |      |           | VBIBruSui107850_2239 | BRA0017 | 15141   | 16481   | 1341 | - | 446 |              | Amide synthase component of siderophore synthetase                                     |       |
| 6 | mgtc |           | VBIBruSui107850_2257 | BRA0035 | 32593   | 32886   | 294  | - | 97  |              | hypothetical protein                                                                   |       |
|   |      |           | VBIBruSui107850_2258 | BRA0036 | 32840   | 33121   | 282  | + | 93  |              | hypothetical protein                                                                   |       |
|   |      |           | VBIBruSui107850_2259 | BRA0037 | 33239   | 35956   | 2718 | - | 905 | <i>mgta</i>  | Mg(2+) transport ATPase, P-type                                                        | 6630  |
|   |      |           | VBIBruSui107850_2260 | BRA0038 | 36218   | 36391   | 174  | - | 57  |              | hypothetical protein                                                                   |       |
|   |      |           | VBIBruSui107850_2261 | BRA0039 | 36522   | 36725   | 204  | - | 67  |              | hypothetical protein                                                                   |       |
|   |      |           | VBIBruSui107850_2262 | BRA0040 | 36727   | 37443   | 717  | - | 238 |              | Mg(2+) transport ATPase protein C                                                      |       |
|   |      |           | VBIBruSui107850_2263 | BRA0041 | 37575   | 38588   | 1014 | - | 337 |              | Sensor histidine kinase                                                                |       |
|   |      |           | VBIBruSui107850_2264 | BRA0042 | 38585   | 39223   | 639  | - | 212 |              | DNA-binding response regulator, LuxR family                                            |       |
| 7 |      |           | VBIBruSui107850_2352 | BRA0131 | 128083  | 129018  | 936  | + | 311 |              | Phosphatidylglycerophosphatase B                                                       |       |
|   |      |           | VBIBruSui107850_2353 | BRA0132 | 129048  | 129203  | 156  | - | 51  |              | hypothetical protein                                                                   | 3626  |
|   |      |           | VBIBruSui107850_2354 | BRA0134 | 129604  | 129999  | 396  | - | 131 |              | hypothetical protein                                                                   |       |
|   |      |           | VBIBruSui107850_2355 | BRA0135 | 129996  | 130976  | 981  | - | 326 |              | Polymyxin resistance protein <i>ArnC</i> , glycosyl transferase                        |       |
|   |      |           | VBIBruSui107850_2356 | BRA0136 | 130960  | 131709  | 750  | - | 249 |              | cellobiose phosphotransferase system <i>celC</i>                                       |       |
| 8 |      |           | VBIBruSui107850_2437 | BRA0220 | 207135  | 208289  | 1155 | + | 384 |              | Butyryl-CoA dehydrogenase                                                              |       |
|   |      |           | VBIBruSui107850_2438 | BRA0221 | 208346  | 208975  | 630  | + | 209 |              | Transcriptional regulator, <i>IcIR</i> family                                          |       |
|   |      |           | VBIBruSui107850_2439 | BRA0222 | 209460  | 210221  | 762  | - | 253 |              | Enoyl-CoA hydratase [branched-chain amino acid degradation]                            |       |
|   |      |           | VBIBruSui107850_2440 | BRA0223 | 210226  | 211755  | 1530 | - | 509 |              | 3-hydroxybutyryl-CoA dehydrogenase; 3-hydroxyacyl-CoA dehydrogenase                    |       |
|   |      |           | VBIBruSui107850_2441 | BRA0224 | 211978  | 213219  | 1242 | - | 413 |              | L-carnitine dehydratase/bile acid-inducible protein F                                  |       |
|   |      |           | VBIBruSui107850_2442 |         | 213203  | 213709  | 507  | + | 168 |              | 2,4-dienoyl-CoA reductase [NADPH]                                                      |       |
|   |      |           | VBIBruSui107850_2443 |         | 213700  | 214371  | 672  | + | 223 |              | 2,4-dienoyl-CoA reductase [NADPH]                                                      |       |
|   |      |           | VBIBruSui107850_2444 | BRA0226 | 214457  | 214921  | 465  | - | 154 |              | Mercuric resistance operon regulatory protein                                          |       |
|   |      |           | VBIBruSui107850_2445 | BRA0227 | 214967  | 215674  | 708  | + | 235 |              | ThiI/Pfpl family protein                                                               | 17519 |
|   |      |           | VBIBruSui107850_2446 | BRA0228 | 215905  | 217248  | 1344 | + | 447 |              | Sensor histidine kinase                                                                |       |
|   |      |           | VBIBruSui107850_2447 |         | 217245  | 217454  | 210  | + | 69  |              | TWO COMPONENT RESPONSE REGULATOR                                                       |       |
|   |      |           | VBIBruSui107850_2448 |         | 217458  | 217913  | 456  | + | 151 |              | TWO COMPONENT RESPONSE REGULATOR                                                       |       |
|   |      |           | VBIBruSui107850_2449 | BRA0231 | 218177  | 218449  | 273  | - | 90  |              | hypothetical protein                                                                   |       |
|   |      |           | VBIBruSui107850_2450 | BRA0232 | 218617  | 219087  | 471  | - | 156 |              | hypothetical protein                                                                   |       |
|   |      |           | VBIBruSui107850_2451 | BRA0233 | 219098  | 221302  | 2205 | - | 734 |              | Sulfite reductase [NADPH] flavoprotein alpha-component                                 |       |
|   |      |           | VBIBruSui107850_2452 | BRA0234 | 221283  | 222260  | 978  | - | 325 |              | Thiamin biosynthesis lipoprotein <i>ApbE</i>                                           |       |
|   |      |           | VBIBruSui107850_2453 | BRA0235 | 222303  | 223478  | 1176 | + | 391 |              | C-DI-GMP PHOSPHODIESTERASE A                                                           |       |
|   |      |           | VBIBruSui107850_2454 | BRA0236 | 223761  | 224654  | 894  | + | 297 |              | INTEGRAL MEMBRANE PROTEIN                                                              |       |
| 9 |      |           | VBIBruSui107850_2552 |         | 318095  | 319054  | 960  | - | 319 |              | Glutamate decarboxylase                                                                |       |
|   |      |           | VBIBruSui107850_2553 |         | 319079  | 319489  | 411  | - | 136 |              | Glutamate decarboxylase                                                                |       |
|   |      |           | VBIBruSui107850_2554 |         | 319489  | 319635  | 147  | - | 48  |              | hypothetical protein                                                                   |       |

|    |         |           |                      |         |         |         |      |   |     |             |                                                                                                  |       |
|----|---------|-----------|----------------------|---------|---------|---------|------|---|-----|-------------|--------------------------------------------------------------------------------------------------|-------|
|    |         | NC_004311 | VBIBruSui107850_2555 | BRA0340 | 319816  | 321096  | 1281 | - | 426 |             | Probable glutamate/gamma-aminobutyrate antiporter                                                |       |
|    |         |           | VBIBruSui107850_2556 | BRA0340 | 321132  | 322085  | 954  | - | 317 |             | Glutaminase                                                                                      | 8592  |
|    |         |           | VBIBruSui107850_2557 | BRA0341 | 322233  | 322577  | 345  | - | 114 | <i>hdeA</i> | hdeA protein                                                                                     |       |
|    |         |           | VBIBruSui107850_2558 | BRA0344 | 323177  | 323341  | 165  | - | 54  |             | hypothetical protein                                                                             |       |
|    |         |           | VBIBruSui107850_2559 | BRA0344 | 323418  | 325010  | 1593 | + | 530 |             | RTN PROTEIN                                                                                      |       |
|    |         |           | VBIBruSui107850_2560 | BRA0345 | 325305  | 325571  | 267  | + | 88  |             | hypothetical protein                                                                             |       |
|    |         |           | VBIBruSui107850_2561 | BRA0346 | 325911  | 326687  | 777  | - | 258 |             | transcriptional regulator, LysR family                                                           |       |
| 10 |         |           | VBIBruSui107850_2614 | BRA0401 | 383533  | 384660  | 1128 | - | 375 |             | Alcohol dehydrogenase                                                                            |       |
|    |         |           | VBIBruSui107850_2615 | BRA0402 | 384907  | 385860  | 954  | - | 317 |             | oxidoreductase, putative                                                                         |       |
|    |         |           | VBIBruSui107850_2616 | BRA0403 | 386451  | 386645  | 195  | + | 64  |             | hypothetical protein                                                                             |       |
|    |         |           | VBIBruSui107850_2617 | BRA0404 | 386912  | 387841  | 930  | + | 309 | <i>oppF</i> | Oligopeptide transport ATP-binding protein OppF (TC 3.A.1.5.1)                                   |       |
|    |         |           | VBIBruSui107850_2618 | BRA0405 | 387862  | 388878  | 1017 | + | 338 | <i>oppD</i> | Oligopeptide transport ATP-binding protein OppD (TC 3.A.1.5.1)                                   |       |
|    |         |           | VBIBruSui107850_2619 | BRA0406 | 388889  | 389806  | 918  | + | 305 |             | Dihydrodipicolinate synthase                                                                     |       |
|    |         | NC_004311 | VBIBruSui107850_2620 | BRA0407 | 389826  | 390698  | 873  | + | 290 |             | Peptide ABC transporter, permease protein                                                        | 13461 |
|    |         |           | VBIBruSui107850_2621 | BRA0408 | 390700  | 391659  | 960  | + | 319 |             | OLIGOPEPTIDE TRANSPORT SYSTEM PERMEASE PROTEIN APPB                                              |       |
|    |         |           | VBIBruSui107850_2622 | BRA0409 | 391759  | 393336  | 1578 | + | 525 |             | Peptide ABC transporter, periplasmic peptide-binding protein                                     |       |
|    |         |           | VBIBruSui107850_2623 | BRA0410 | 393339  | 394067  | 729  | + | 242 |             | Transcriptional regulator, GntR family                                                           |       |
|    |         |           | VBIBruSui107850_2624 | BRA0411 | 394266  | 395804  | 1539 | - | 512 |             | N-acetylmannosamine-6-phosphate 2-epimerase / N-acetylmannosamine kinase                         |       |
|    |         |           | VBIBruSui107850_2625 |         | 395828  | 396010  | 183  | - | 60  |             | Sialic acid-induced transmembrane protein YjhT(NanM), possible mutarotase                        |       |
|    |         |           | VBIBruSui107850_2626 | BRA0413 | 396089  | 396994  | 906  | - | 301 |             | Sialic acid-induced transmembrane protein YjhT(NanM), possible mutarotase                        |       |
| 11 | SAR 2-7 |           | VBIBruSui107850_2832 | BRA0616 | 602010  | 604199  | 2190 | - | 729 |             | Alkaline phosphatase                                                                             |       |
|    |         |           | VBIBruSui107850_2833 | BRA0617 | 604179  | 604301  | 123  | + | 40  |             | hypothetical protein                                                                             |       |
|    |         |           | VBIBruSui107850_2834 | BRA0618 | 604728  | 605450  | 723  | + | 240 |             | Phytochrome-like protein; Cph2                                                                   |       |
|    |         | NC_004311 | VBIBruSui107850_2835 | BRA0621 | 606348  | 606725  | 378  | + | 125 |             | Endonuclease V                                                                                   | 6606  |
|    |         |           | VBIBruSui107850_2836 | BRA0622 | 606866  | 607171  | 306  | - | 101 |             | hypothetical protein                                                                             |       |
|    |         |           | VBIBruSui107850_2837 | BRA0623 | 607316  | 607504  | 189  | - | 62  |             | hypothetical protein                                                                             |       |
|    |         |           | VBIBruSui107850_2838 | BRA0625 | 607555  | 607848  | 294  | - | 97  |             | hypothetical protein                                                                             |       |
|    |         |           | VBIBruSui107850_2839 | BRA0626 | 607942  | 608616  | 675  | - | 224 |             | DNA polymerase III, epsilon subunit:DNA polymerase 3, epsilon subunit                            |       |
| 12 | SAR 2-8 |           | VBIBruSui107850_3011 | BRA0796 | 780107  | 780301  | 195  | + | 64  |             | hypothetical protein                                                                             |       |
|    |         |           | VBIBruSui107850_3012 | BRA0797 | 780298  | 780576  | 279  | + | 92  |             | hypothetical protein                                                                             |       |
|    |         |           | VBIBruSui107850_3013 | BRA0799 | 780885  | 781079  | 195  | + | 64  |             | hypothetical protein                                                                             |       |
|    |         |           | VBIBruSui107850_3014 |         | 781598  | 781762  | 165  | - | 54  |             | TRANSCRIPTIONAL REGULATORY PROTEIN, LYSR FAMILY                                                  |       |
|    |         | NC_004311 | VBIBruSui107850_3015 | BRA0800 | 782085  | 783245  | 1161 | - | 386 |             | acyl-CoA dehydrogenase family protein                                                            | 8913  |
|    |         |           | VBIBruSui107850_3016 |         | 783378  | 784178  | 801  | + | 266 | <i>nikE</i> | Nickel transport ATP-binding protein Nike (TC 3.A.1.5.3)                                         |       |
|    |         |           | VBIBruSui107850_3017 | BRA0801 | 784175  | 784963  | 789  | + | 262 | <i>nikD</i> | Nickel transport ATP-binding protein NikD (TC 3.A.1.5.3)                                         |       |
|    |         |           | VBIBruSui107850_3018 | BRA0802 | 784960  | 785832  | 873  | + | 290 | <i>nikC</i> | Nickel transport system permease protein NikC (TC 3.A.1.5.3)                                     |       |
|    |         |           | VBIBruSui107850_3019 | BRA0803 | 785829  | 786773  | 945  | + | 314 | <i>nikB</i> | Nickel transport system permease protein NikB (TC 3.A.1.5.3)                                     |       |
|    |         |           | VBIBruSui107850_3020 | BRA0804 | 786775  | 788355  | 1581 | + | 526 | <i>nikA</i> | Nickel ABC transporter, periplasmic nickel-binding protein Nika (TC 3.A.1.5.3)                   |       |
|    |         |           | VBIBruSui107850_3021 | BRA0805 | 788622  | 789020  | 399  | - | 132 | <i>nikR</i> | Nickel responsive regulator NikR                                                                 |       |
| 13 |         |           | VBIBruSui107850_3422 | BRA1192 | 1194686 | 1195585 | 900  | - | 299 |             | Transcriptional regulator, AraC family                                                           |       |
|    |         |           | VBIBruSui107850_3423 | BRA1193 | 1195801 | 1196955 | 1155 | - | 384 | <i>livK</i> | High-affinity leucine-specific transport system, periplasmic binding protein LivK (TC 3.A.1.4.1) |       |
|    |         |           | VBIBruSui107850_3424 | BRA1194 | 1197157 | 1198020 | 864  | - | 287 | <i>livH</i> | High-affinity branched-chain amino acid transport system permease protein LivH (TC 3.A.1.4.1)    |       |
|    |         |           | VBIBruSui107850_3425 |         | 1198017 | 1198658 | 642  | - | 213 | <i>livM</i> | Branched-chain amino acid transport system permease protein LivM (TC 3.A.1.4.1)                  |       |

|    |           |                      |         |         |         |      |   |     |               |                                                                                                               |       |
|----|-----------|----------------------|---------|---------|---------|------|---|-----|---------------|---------------------------------------------------------------------------------------------------------------|-------|
|    | NC_004311 | VBIBruSui107850_3426 |         | 1198701 | 1198964 | 264  | - | 87  | <i>livM</i>   | Branched-chain amino acid transport system permease protein LivM (TC 3.A.1.4.1)                               | 9897  |
|    |           | VBIBruSui107850_3427 | BRA1196 | 1198961 | 1199695 | 735  | - | 244 | <i>livG</i>   | Branched-chain amino acid transport ATP-binding protein LivG (TC 3.A.1.4.1)                                   |       |
|    |           | VBIBruSui107850_3428 | BRA1197 | 1199692 | 1200420 | 729  | - | 242 | <i>livF</i>   | Branched-chain amino acid transport ATP-binding protein LivF (TC 3.A.1.4.1)                                   |       |
|    |           | VBIBruSui107850_3429 | BRA1198 | 1200449 | 1202152 | 1704 | + | 567 | <i>cadA</i>   | cadmium-translocating P-type ATPase                                                                           |       |
|    |           | VBIBruSui107850_3430 | BRA1199 | 1202669 | 1204021 | 1353 | + | 450 | <i>hemN</i>   | Coproporphyrinogen III oxidase, oxygen-independent                                                            |       |
|    |           | VBIBruSui107850_3431 | BRA1200 | 1204063 | 1204245 | 183  | - | 60  |               | hypothetical protein                                                                                          |       |
|    |           | VBIBruSui107850_3432 | BRA1201 | 1204305 | 1204583 | 279  | + | 92  |               | hypothetical protein                                                                                          |       |
| 14 |           | VBIBruSui107850_3384 |         | 1154316 | 1155155 | 840  | - | 279 |               | regulatory protein for 2-phenylethylamine catabolism                                                          |       |
|    |           | VBIBruSui107850_3385 | BRA1155 | 1155255 | 1156661 | 1407 | - | 468 |               | Aldehyde dehydrogenase                                                                                        |       |
|    |           | VBIBruSui107850_3386 |         | 1156661 | 1156798 | 138  | - | 45  |               | hypothetical protein                                                                                          |       |
|    |           | VBIBruSui107850_3387 | BRA1156 | 1156818 | 1157627 | 810  | + | 269 | <i>hpaI</i>   | 2,4-dihydroxyhept-2-ene-1,7-dioic acid aldolase                                                               |       |
|    |           | VBIBruSui107850_3388 | BRA1158 | 1157845 | 1158648 | 804  | + | 267 | <i>hpaH</i>   | 2-oxo-hepta-3-ene-1,7-dioic acid hydratase                                                                    |       |
|    |           | VBIBruSui107850_3389 | BRA1159 | 1158652 | 1159518 | 867  | + | 288 |               | 2-hydroxyhepta-2,4-diene-1,7-dioate isomerase / 5-carboxymethyl-2-oxo-hex-3-ene-                              |       |
|    |           | VBIBruSui107850_3390 |         | 1159587 | 1160261 | 675  | + | 224 |               | homoprotocatechuate 2,3-dioxygenase                                                                           |       |
|    |           | VBIBruSui107850_3391 |         | 1160262 | 1160525 | 264  | + | 87  |               | homoprotocatechuate 2,3-dioxygenase                                                                           |       |
|    |           | VBIBruSui107850_3392 | BRA1161 | 1160622 | 1162136 | 1515 | + | 504 | <i>hpaE</i>   | 5-carboxymethyl-2-hydroxymuconate semialdehyde dehydrogenase                                                  |       |
|    |           | VBIBruSui107850_3393 | BRA1162 | 1162206 | 1162652 | 447  | + | 148 | <i>hpcD</i>   | 5-carboxymethyl-2-hydroxymuconate delta-isomerase                                                             |       |
|    |           | VBIBruSui107850_3394 | BRA1163 | 1162764 | 1163255 | 492  | - | 163 | <i>hpaR</i>   | Homoprotocatechuate degradative operon repressor                                                              |       |
|    |           | VBIBruSui107850_3395 | BRA1164 | 1163245 | 1164237 | 993  | + | 330 |               | Homoserine kinase                                                                                             |       |
|    |           | VBIBruSui107850_3396 | BRA1165 | 1164242 | 1165525 | 1284 | + | 427 |               | Omega-amino acid--pyruvate aminotransferase                                                                   |       |
|    | NC_004311 | VBIBruSui107850_3397 | BRA1166 | 1165527 | 1166885 | 1359 | + | 452 |               | Omega-amino acid--pyruvate aminotransferase                                                                   | 24985 |
|    |           | VBIBruSui107850_3398 | BRA1167 | 1166898 | 1167542 | 645  | + | 214 |               | HYDROLASE FAMILY PROTEIN                                                                                      |       |
|    |           | VBIBruSui107850_3399 | BRA1168 | 1167539 | 1168795 | 1257 | + | 418 |               | Transcriptional regulator                                                                                     |       |
|    |           | VBIBruSui107850_3400 |         | 1168795 | 1169577 | 783  | + | 260 |               | Transcriptional regulator, IclR family                                                                        |       |
|    |           | VBIBruSui107850_3401 | BRA1170 | 1169869 | 1171320 | 1452 | - | 483 |               | AMINO ACID PERMEASE                                                                                           |       |
|    |           | VBIBruSui107850_3402 | BRA1171 | 1171392 | 1172870 | 1479 | - | 492 |               | Aldehyde dehydrogenase                                                                                        |       |
|    |           | VBIBruSui107850_3403 | BRA1172 | 1173053 | 1174711 | 1659 | - | 552 |               | Exoenzymes regulatory protein aepA precursor                                                                  |       |
|    |           | VBIBruSui107850_3404 | BRA1173 | 1174778 | 1175959 | 1182 | - | 393 |               | branched-chain amino acid ABC transporter, periplasmic amino acid-binding protein, putative                   |       |
|    |           | VBIBruSui107850_3405 | BRA1174 | 1176032 | 1176901 | 870  | - | 289 |               | High-affinity branched-chain amino acid transport system permease protein LivH (TC 3.A.1.4.1)                 |       |
|    |           | VBIBruSui107850_3406 | BRA1175 | 1176888 | 1178600 | 1713 | - | 570 |               | HIGH-AFFINITY BRANCHED-CHAIN AMINO ACID TRANSPORT SYSTEM PERMEASE                                             |       |
|    |           | VBIBruSui107850_3407 | BRA1176 | 1178597 | 1179301 | 705  | - | 234 |               | Branched-chain amino acid transport ATP-binding protein LivF (TC 3.A.1.4.1)                                   |       |
| 15 | virB      | VBIBruSui107850_2278 | BRA0058 | 56135   | 56653   | 518  | - | 172 | <i>virB12</i> | IncQ plasmid conjugative transfer protein TraP                                                                |       |
|    |           | VBIBruSui107850_2279 | BRA0059 | 56802   | 57860   | 1059 | - | 352 | <i>virB11</i> | ATPase provides energy for both assembly of type IV secretion complex and secretion of T-DNA complex (VirB11) |       |
|    |           | VBIBruSui107850_2280 | BRA0060 | 57868   | 59043   | 1176 | - | 391 | <i>virB10</i> | Inner membrane protein forms channel for type IV secretion of T-DNA complex (VirB10)                          |       |
|    |           | VBIBruSui107850_2281 | BRA0061 | 59040   | 59909   | 870  | - | 289 | <i>virB9</i>  | Forms the bulk of type IV secretion complex that spans outer membrane and periplasm (VirB9)                   |       |
|    |           | VBIBruSui107850_2282 | BRA0062 | 59906   | 60625   | 720  | - | 239 | <i>virB8</i>  | Inner membrane protein forms channel for type IV secretion of T-DNA complex (VirB8)                           |       |
|    | NC_004311 | VBIBruSui107850_2283 | BRA0063 | 60628   | 60801   | 173  | - | 57  | <i>virB7</i>  | type IV secretion protein VirB7                                                                               | 11049 |
|    |           | VBIBruSui107850_2284 | BRA0064 | 60965   | 62008   | 1044 | - | 347 | <i>virB6</i>  | Integral inner membrane protein of type IV secretion complex (VirB6)                                          |       |
|    |           | VBIBruSui107850_2284 | BRA0065 | 62192   | 62908   | 717  | - | 238 | <i>virB5</i>  | Minor pilin of type IV secretion complex (VirB5)                                                              |       |

|    |           |                      |         |        |        |      |   |     |              |                                                                                                              |       |
|----|-----------|----------------------|---------|--------|--------|------|---|-----|--------------|--------------------------------------------------------------------------------------------------------------|-------|
|    |           | VBIBruSui107850_2285 | BRA0066 | 62913  | 65411  | 2499 | - | 832 | <i>virB4</i> | ATPase provides energy for both assembly of type IV secretion complex and secretion of T-DNA complex (VirB4) |       |
|    |           | VBIBruSui107850_2286 | BRA0067 | 65408  | 65674  | 267  | - | 88  | <i>virB3</i> | Inner membrane protein forms channel for type IV secretion of T-DNA complex (VirB3)                          |       |
|    |           | VBIBruSui107850_2287 | BRA0068 | 65772  | 65933  | 162  | - | 53  | <i>virB2</i> | Major pilus subunit of type IV secretion complex (VirB2)                                                     |       |
|    |           | VBIBruSui107850_2288 | BRA0069 | 66525  | 67184  | 660  | - | 219 | <i>virB1</i> | Bore hole in peptidoglycan layer allowing type IV secretion complex assembly to occur (VirB1)                |       |
| 16 | Wbk       |                      |         |        |        |      |   |     |              |                                                                                                              |       |
|    |           | VBIBruSui107850_0535 | BR0517  | 516587 | 517366 | 780  | + | 259 | <i>wbkC</i>  | formyltransferase, putative                                                                                  |       |
|    |           | VBIBruSui107850_0536 | BR0518  | 517393 | 518247 | 855  | + | 284 | <i>wbkB</i>  | WbkB protein                                                                                                 |       |
|    |           | VBIBruSui107850_0537 | BR0519  | 518244 | 519110 | 867  | + | 288 | <i>wzt</i>   | O-antigen export system, ATP-binding protein                                                                 |       |
|    |           | VBIBruSui107850_0538 | BR0520  | 518999 | 519796 | 798  | + | 265 | <i>wzm</i>   | O-antigen export system permease protein RfbD                                                                |       |
|    |           | VBIBruSui107850_0539 | BR0521  | 519796 | 520899 | 1104 | + | 367 | <i>per</i>   | Perosamine synthase                                                                                          |       |
|    |           | VBIBruSui107850_0540 | BR0522  | 520907 | 521995 | 1089 | + | 362 | <i>gmd</i>   | GDP-mannose 4,6 dehydratase                                                                                  |       |
|    |           | VBIBruSui107850_0541 | BR0523  | 522616 | 522942 | 327  | - | 108 |              | ISBm1, transposase orfA                                                                                      |       |
|    |           | VBIBruSui107850_0542 |         | 523271 | 524059 | 789  | - | 262 |              | TRANSPOSASE                                                                                                  |       |
|    |           | VBIBruSui107850_0543 |         | 524252 | 524497 | 246  | - | 81  |              | Transposase                                                                                                  |       |
|    |           | VBIBruSui107850_0544 | BR0527  | 524494 | 524886 | 393  | - | 130 |              | IS711, transposase orfB                                                                                      |       |
|    |           | VBIBruSui107850_0545 | BR0528  | 525001 | 525126 | 126  | - | 41  |              | TRANSPOSASE                                                                                                  |       |
|    |           | VBIBruSui107850_0546 | BR0529  | 525257 | 526375 | 1119 | - | 372 | <i>wbkA</i>  | MANNOSYLTRANSFERASE                                                                                          |       |
|    | NC_004310 | VBIBruSui107850_0547 |         | 526400 | 526801 | 402  | - | 133 |              | IS5 family element, transposase orfA                                                                         | 18298 |
|    |           | VBIBruSui107850_0548 | BR0531  | 526798 | 527238 | 441  | - | 146 |              | TRANSPOSASE                                                                                                  |       |
|    |           | VBIBruSui107850_0549 |         | 527133 | 527258 | 126  | + | 41  |              | hypothetical protein                                                                                         |       |
|    |           | VBIBruSui107850_0550 |         | 527328 | 527702 | 375  | + | 124 |              | TRANSPOSASE                                                                                                  |       |
|    |           | VBIBruSui107850_0551 |         | 527702 | 527839 | 138  | + | 45  |              | hypothetical protein                                                                                         |       |
|    |           | VBIBruSui107850_0552 | BR0533  | 528014 | 528475 | 462  | - | 153 |              | ISBm1, transposase orfA                                                                                      |       |
|    |           | VBIBruSui107850_0554 | BR0534  | 528394 | 528810 | 417  | - | 138 |              | TRANSPOSASE                                                                                                  |       |
|    |           | VBIBruSui107850_0555 |         | 529194 | 529469 | 276  | - | 91  |              | TRANSPOSASE                                                                                                  |       |
|    |           | VBIBruSui107850_0556 | BR0537  | 529702 | 531039 | 1338 | - | 445 | <i>manB</i>  | Phosphomannomutase                                                                                           |       |
|    |           | VBIBruSui107850_0557 | BR0538  | 531079 | 532488 | 1410 | - | 469 | <i>manC</i>  | Mannose-1-phosphate guanylyltransferase (GDP)                                                                |       |
|    |           | VBIBruSui107850_0558 | BR0539  | 532521 | 533693 | 1173 | - | 390 | <i>manA</i>  | Mannose-6-phosphate isomerase                                                                                |       |
|    |           | VBIBruSui107850_0559 | BR0540  | 533776 | 534885 | 1110 | - | 369 | <i>wbkE</i>  | Glycosyltransferase                                                                                          |       |

**Table S5. Genes in genomic regions that are unique to the core *Brucella* clade.**

| Reference genome          | Region | Other identifier | Accession Number | PATRIC Locus Tag     | RefSeq Locus Tag | Start  | End                  | Strand | AA Length | Gene Symbol | Product                                           | Size  |
|---------------------------|--------|------------------|------------------|----------------------|------------------|--------|----------------------|--------|-----------|-------------|---------------------------------------------------|-------|
| <i>Brucella suis</i> 1330 | core 1 | SAR1-2           | NC_004310        | VBIBruSui107850_0266 | BR0256           | 265358 | 267196               | -      | 612       |             | site-specific recombinase, phage integrase family | 6917  |
|                           |        |                  |                  | VBIBruSui107850_0267 | BR0257           | 267186 | 267299               | +      | 37        |             | hypothetical protein                              |       |
|                           |        |                  |                  | VBIBruSui107850_0268 | BR0258           | 267516 | 267713               | -      | 65        |             | BRO family protein                                |       |
|                           |        |                  |                  | VBIBruSui107850_0269 | BR0259           | 267726 | 267920               | -      | 64        |             | hypothetical protein                              |       |
|                           |        |                  |                  | VBIBruSui107850_0270 |                  | 268203 | 268799               | +      | 198       |             | hypothetical protein                              |       |
|                           |        |                  |                  | VBIBruSui107850_0271 | BR0260           | 268821 | 269129               | -      | 102       |             | Site-specific recombinase, resolvase family       |       |
|                           |        |                  |                  | VBIBruSui107850_0272 |                  | 269080 | 269310               | -      | 76        |             | RECOMBINASE                                       |       |
|                           |        |                  |                  | VBIBruSui107850_0273 | BR0261           | 269666 | 271051               | -      | 461       |             | hypothetical protein                              |       |
|                           |        |                  |                  | VBIBruSui107850_0274 |                  | 271515 | 271634               | +      | 39        |             | hypothetical protein                              |       |
|                           |        |                  |                  | VBIBruSui107850_0275 | BR0262           | 271624 | 271818               | -      | 64        |             | hypothetical protein                              |       |
| VBIBruSui107850_0276      |        | 272171           | 272275           | -                    | 34               |        | hypothetical protein |        |           |             |                                                   |       |
| <i>Brucella suis</i> 1330 | core 2 | SAR1-5           | NC_004310        | VBIBruSui107850_0734 | BR0722           | 706067 | 706828               | -      | 253       |             | hypothetical protein                              | 15953 |
|                           |        |                  |                  | VBIBruSui107850_0735 | BR0723           | 707049 | 707495               | +      | 148       |             | exonuclease, putative                             |       |
|                           |        |                  |                  | VBIBruSui107850_0736 | BR0724           | 707985 | 708434               | +      | 149       |             | Adenylate kinase, archaeal type                   |       |
|                           |        |                  |                  | VBIBruSui107850_0737 | BR0725           | 708527 | 710095               | +      | 522       |             | Acetyltransferase, GNAT family                    |       |
|                           |        |                  |                  | VBIBruSui107850_0738 | BR0726           | 710037 | 710831               | +      | 264       |             | TRANSCRIPTIONAL REGULATOR                         |       |
|                           |        |                  |                  | VBIBruSui107850_0739 | BR0727           | 710856 | 711275               | +      | 139       |             | hypothetical protein                              |       |
|                           |        |                  |                  | VBIBruSui107850_0740 |                  | 711754 | 711870               | +      | 38        |             | hypothetical protein                              |       |
|                           |        |                  |                  | VBIBruSui107850_0741 |                  | 711934 | 712062               | +      | 42        |             | hypothetical protein                              |       |
|                           |        |                  |                  | VBIBruSui107850_0742 | BR0729           | 712551 | 714665               | -      | 704       |             | TRANSPOSASE                                       |       |
|                           |        |                  |                  | VBIBruSui107850_0743 | BR0730           | 714631 | 715608               | -      | 325       |             | transposition protein, putative                   |       |
|                           |        |                  |                  | VBIBruSui107850_0744 | BR0731           | 715605 | 717182               | -      | 525       |             | hypothetical protein                              |       |
|                           |        |                  |                  | VBIBruSui107850_0745 |                  | 717237 | 717443               | -      | 68        |             | hypothetical protein                              |       |
|                           |        |                  |                  | VBIBruSui107850_0746 | BR0733           | 717481 | 717672               | +      | 63        |             | hypothetical protein                              |       |
|                           |        |                  |                  | VBIBruSui107850_0747 | BR0734           | 717919 | 719226               | -      | 435       |             | hypothetical protein                              |       |
|                           |        |                  |                  | VBIBruSui107850_0748 |                  | 719680 | 721053               | -      | 457       |             | exclusion of bacteriophage Ap1                    |       |
| VBIBruSui107850_0749      | BR0735 | 721142           | 722020           | -                    | 292              |        | hypothetical protein |        |           |             |                                                   |       |
| <i>Brucella suis</i> 1330 | core 3 | SAR 1-6          | NC_004310        | VBIBruSui107850_0805 |                  | 775163 | 775288               | -      | 41        |             | hypothetical protein                              | 2643  |
|                           |        |                  |                  | VBIBruSui107850_0806 | BR0796           | 776058 | 776567               | -      | 169       |             | hypothetical protein                              |       |
|                           |        |                  |                  | VBIBruSui107850_0807 | BR0797           | 776564 | 776959               | -      | 131       |             | hypothetical protein                              |       |
|                           |        |                  |                  | VBIBruSui107850_0808 | BR0798           | 777214 | 777348               | -      | 44        |             | hypothetical protein                              |       |
|                           |        |                  |                  | VBIBruSui107850_0809 | BR0799           | 777405 | 777806               | +      | 133       |             | hypothetical protein                              |       |
| <i>Brucella suis</i> 1330 | core 4 | GI2              |                  | VBIBruSui107850_0977 | BR0966           | 937800 | 938825               | +      | 341       |             | site-specific recombinase, phage integrase family |       |
|                           |        |                  |                  | VBIBruSui107850_0978 |                  | 938812 | 938937               | +      | 41        |             | hypothetical protein                              |       |
|                           |        |                  |                  | VBIBruSui107850_0979 | BR0967           | 939000 | 940202               | -      | 400       |             | hypothetical protein                              |       |
|                           |        |                  |                  | VBIBruSui107850_0980 | BR0968           | 940199 | 940429               | -      | 76        |             | hypothetical protein                              |       |
|                           |        |                  |                  | VBIBruSui107850_0981 | BR0969           | 940426 | 940701               | -      | 91        |             | hypothetical protein                              |       |
|                           |        |                  |                  | VBIBruSui107850_0982 |                  | 940810 | 940971               | +      | 53        |             | hypothetical protein                              |       |
|                           |        |                  |                  | VBIBruSui107850_0983 | BR0970           | 940928 | 941311               | -      | 127       |             | hypothetical protein                              |       |
|                           |        |                  |                  | VBIBruSui107850_0984 | BR0971           | 941546 | 942256               | -      | 236       |             | 23 kDa OUTER-MEMBRANE IMMUNOGENIC PROTEIN         |       |



|                    |         |           |                      |         |         |         |   |     |                                                                                                                                                      |       |
|--------------------|---------|-----------|----------------------|---------|---------|---------|---|-----|------------------------------------------------------------------------------------------------------------------------------------------------------|-------|
|                    |         |           | VBIBruSui107850_2590 | BRA0377 | 358217  | 359938  | + | 573 | hypothetical protein                                                                                                                                 |       |
|                    |         |           | VBIBruSui107850_2591 | BRA0378 | 360180  | 361100  | + | 306 | hypothetical protein                                                                                                                                 |       |
|                    |         |           | VBIBruSui107850_2592 | BRA0379 | 361149  | 361343  | + | 64  | DNA-damage-inducible protein J                                                                                                                       |       |
| Brucella suis 1330 | core 10 | SAR2-10   | VBIBruSui107850_3049 | BRA0833 | 818865  | 819587  | - | 240 | hypothetical protein                                                                                                                                 |       |
|                    |         |           | VBIBruSui107850_3050 | BRA0834 | 819594  | 819923  | + | 109 | hypothetical protein                                                                                                                                 |       |
|                    |         |           | VBIBruSui107850_3051 | BRA0835 | 820233  | 820349  | - | 38  | hypothetical protein                                                                                                                                 |       |
|                    |         |           | VBIBruSui107850_3052 | BRA0836 | 820645  | 820842  | + | 65  | hypothetical protein                                                                                                                                 |       |
|                    |         |           | VBIBruSui107850_3053 | BRA0837 | 820911  | 821066  | - | 51  | hypothetical protein                                                                                                                                 |       |
|                    |         |           | VBIBruSui107850_3054 | BRA0838 | 821860  | 822000  | + | 46  | hypothetical protein                                                                                                                                 |       |
|                    |         |           | VBIBruSui107850_3055 | BRA0839 | 822161  | 822793  | - | 210 | hypothetical protein                                                                                                                                 |       |
|                    |         | NC_004311 | VBIBruSui107850_3056 | BRA0840 | 822801  | 824327  | - | 508 | <i>hsdM</i><br>Type I restriction-modification system, DNA-methyltransferase subunit M                                                               | 13113 |
|                    |         |           | VBIBruSui107850_3057 | BRA0841 | 824317  | 825540  | - | 407 | <i>hsdS</i><br>Type I restriction-modification system, specificity subunit S                                                                         |       |
|                    |         |           | VBIBruSui107850_3058 | BRA0842 | 825537  | 828506  | - | 989 | <i>hsdR</i><br>Type I restriction-modification system, restriction subunit R                                                                         |       |
|                    |         |           | VBIBruSui107850_3059 | BRA0843 | 828503  | 829243  | - | 246 | Putative predicted metal-dependent hydrolase                                                                                                         |       |
|                    |         |           | VBIBruSui107850_3060 | BRA0844 | 829212  | 830180  | - | 322 | TRANSPORTER                                                                                                                                          |       |
|                    |         |           | VBIBruSui107850_3061 |         | 830398  | 830544  | - | 48  | hypothetical protein                                                                                                                                 |       |
|                    |         |           | VBIBruSui107850_3062 |         | 830560  | 831978  | - | 472 | hypothetical protein                                                                                                                                 |       |
| Brucella suis 1330 | core 11 | GI5       | VBIBruSui107850_3297 | BRA1073 | 1056214 | 1056495 | + | 93  | TRANSPOSASE<br>Predicted regulator for the phosphate utilization, <i>brpA</i>                                                                        |       |
|                    |         |           | VBIBruSui107850_3298 | BRA1074 | 1056737 | 1057468 | - | 243 | hypothetical protein                                                                                                                                 |       |
|                    |         |           | VBIBruSui107850_3299 | BRA1075 | 1057465 | 1057593 | - | 42  | hypothetical protein                                                                                                                                 |       |
|                    |         |           | VBIBruSui107850_3300 | BRA1076 | 1057664 | 1059106 | + | 480 | 2-ketoglutaric semialdehyde dehydrogenase                                                                                                            |       |
|                    |         |           | VBIBruSui107850_3301 | BRA1077 | 1059118 | 1060380 | + | 420 | CAIB/BAIF family protein                                                                                                                             |       |
|                    |         |           | VBIBruSui107850_3302 | BRA1078 | 1060436 | 1061440 | + | 334 | <i>oppF</i><br>Oligopeptide transport ATP-binding protein OppF (TC 3.A.1.5.1)                                                                        |       |
|                    |         |           | VBIBruSui107850_3303 | BRA1079 | 1061433 | 1062398 | + | 321 | <i>oppD</i><br>Oligopeptide transport ATP-binding protein oppD (TC 3.A.1.5.1)                                                                        |       |
|                    |         |           | VBIBruSui107850_3304 | BRA1080 | 1062483 | 1063328 | + | 281 | <i>oppC</i><br>Dipeptide transport system permease protein DppC (TC 3.A.1.5.2)                                                                       |       |
|                    |         |           | VBIBruSui107850_3305 | BRA1081 | 1063340 | 1064353 | + | 337 | <i>oppB</i><br>Oligopeptide transport system permease protein OppB (TC 3.A.1.5.1)                                                                    |       |
|                    |         |           | VBIBruSui107850_3306 | BRA1082 | 1064529 | 1065335 | - | 268 | Transcriptional regulator, IclR family                                                                                                               |       |
|                    |         |           | VBIBruSui107850_3307 |         | 1065395 | 1066681 | - | 428 | Dihydrolipoamide acyltransferase component of branched-chain alpha-keto acid dehydrogenase complex                                                   |       |
|                    |         |           | VBIBruSui107850_3308 | BRA1084 | 1066765 | 1068324 | + | 519 | Dipeptide-binding ABC transporter, periplasmic substrate-binding component (TC 3.A.1.5.2)                                                            |       |
|                    |         |           | VBIBruSui107850_3309 |         | 1068414 | 1069154 | + | 246 | Branched-chain alpha-keto acid dehydrogenase, E1 component, alpha subunit / Branched-chain alpha-keto acid dehydrogenase, E1 component, beta subunit |       |
|                    |         |           | VBIBruSui107850_3310 |         | 1069144 | 1070586 | + | 480 | Branched-chain alpha-keto acid dehydrogenase, E1 component, alpha subunit / Branched-chain alpha-keto acid dehydrogenase, E1 component, beta subunit |       |
|                    |         |           | VBIBruSui107850_3311 | BRA1086 | 1070601 | 1072121 | + | 506 | α-ketoglutarate CoA dehydrogenase, α-ketoglutarate                                                                                                   |       |
|                    |         |           | VBIBruSui107850_3312 | BRA1087 | 1072123 | 1072905 | + | 260 | β-ketoglutarate CoA dehydrogenase, β-ketoglutarate                                                                                                   |       |
|                    |         |           | VBIBruSui107850_3313 | BRA1088 | 1073088 | 1074230 | - | 380 | Butyryl-CoA dehydrogenase                                                                                                                            |       |

|           |                       |         |         |                     |           |        |                                                                                                     |   |     |                      |  |
|-----------|-----------------------|---------|---------|---------------------|-----------|--------|-----------------------------------------------------------------------------------------------------|---|-----|----------------------|--|
| NC_004311 | VBIBruSui107850_3314  | BRA1089 | 1074673 | 1076841             | -         | 722    | Penicillin acylase                                                                                  |   |     |                      |  |
|           | VBIBruSui107850_3315  | BRA1090 | 1076864 | 1078408             | -         | 514    | Peptide ABC transporter, periplasmic peptide-binding protein                                        |   |     |                      |  |
|           | VBIBruSui107850_3316  | BRA1092 | 1078610 | 1079509             | -         | 299    | <i>oppB</i> Dipeptide transport system permease protein DppB (TC 3.A.1.5.2)                         |   |     |                      |  |
|           | VBIBruSui107850_3317  | BRA1093 | 1079502 | 1080392             | -         | 296    | <i>oppC</i> Dipeptide transport system permease protein DppC (TC 3.A.1.5.2)                         |   |     |                      |  |
|           | VBIBruSui107850_3318  | BRA1094 | 1080395 | 1081393             | -         | 332    | <i>oppD</i> Oligopeptide transport ATP-binding protein OppD (TC 3.A.1.5.1)                          |   |     |                      |  |
|           | VBIBruSui107850_3319  |         | 1081381 | 1082358             | -         | 325    | <i>DppF</i> Dipeptide transport ATP-binding protein DppF (TC 3.A.1.5.2)                             |   |     |                      |  |
|           | VBIBruSui107850_3320  | BRA1096 | 1082617 | 1083330             | -         | 237    | Predicted regulator PutR for proline utilization, GntR family                                       |   |     |                      |  |
|           | VBIBruSui107850_3321  | BRA1097 | 1083456 | 1084952             | -         | 498    | Putative hemin-binding lipoprotein                                                                  |   |     |                      |  |
|           | VBIBruSui107850_3322  | BRA1098 | 1084988 | 1085998             | -         | 336    | <i>oppB</i> Oligopeptide transport system permease protein OppB (TC 3.A.1.5.1)                      |   |     |                      |  |
|           | VBIBruSui107850_3323  | BRA1099 | 1085995 | 1086828             | -         | 277    | <i>oppC</i> Oligopeptide transport system permease protein oppC (TC 3.A.1.5.1)                      |   |     |                      |  |
|           | VBIBruSui107850_3324  |         | 1086828 | 1086965             | -         | 45     | <i>oppD</i> Oligopeptide transport ATP-binding protein oppD (TC 3.A.1.5.1)                          |   |     |                      |  |
|           | VBIBruSui107850_3325  |         | 1087412 | 1087528             | +         | 38     | hypothetical protein                                                                                |   |     |                      |  |
|           | VBIBruSui107850_3326  | BRA1101 | 1087816 | 1088793             | -         | 325    | <i>oppF</i> Oligopeptide transport ATP-binding protein OppF (TC 3.A.1.5.1)                          |   |     |                      |  |
|           | VBIBruSui107850_3327  | BRA1102 | 1088856 | 1089665             | -         | 269    | antibiotic-induced protein Drp35                                                                    |   |     |                      |  |
|           | VBIBruSui107850_3328  | BRA1103 | 1089680 | 1091098             | -         | 472    | Amidase family protein                                                                              |   |     |                      |  |
|           | VBIBruSui107850_3329  |         | 1091144 | 1091779             | +         | 211    | <i>potD</i> ABC transporter, periplasmic spermidine putrescine-binding protein PotD (TC 3.A.1.11.1) |   |     |                      |  |
|           | VBIBruSui107850_3330  |         | 1091731 | 1092171             | +         | 146    | <i>potD</i> ABC transporter, periplasmic spermidine putrescine-binding protein PotD (TC 3.A.1.11.1) |   |     |                      |  |
|           | VBIBruSui107850_3331  | BRA1105 | 1092218 | 1093021             | +         | 267    | <i>potC</i> Spermidine Putrescine ABC transporter permease component potC (TC 3.A.1.11.1)           |   |     |                      |  |
|           | VBIBruSui107850_3332  | BRA1106 | 1093018 | 1093884             | +         | 288    | <i>potB</i> Spermidine Putrescine ABC transporter permease component PotB (TC 3.A.1.11.1)           |   |     |                      |  |
|           | VBIBruSui107850_3333  |         | 1093889 | 1094143             | +         | 84     | <i>potA</i> Putrescine transport ATP-binding protein PotA (TC 3.A.1.11.1)                           |   |     |                      |  |
|           | VBIBruSui107850_3334  |         | 1094195 | 1094932             | +         | 245    | <i>potA</i> Putrescine transport ATP-binding protein PotA (TC 3.A.1.11.1)                           |   |     |                      |  |
|           | VBIBruSui107850_3335  | BRA1108 | 1095264 | 1096499             | -         | 411    | Glutamate-1-semialdehyde aminotransferase                                                           |   |     |                      |  |
|           | VBIBruSui107850_3336  | BRA1109 | 1096649 | 1098328             | -         | 559    | Blr3550 protein                                                                                     |   |     |                      |  |
|           | VBIBruSui107850_3337  | BRA1110 | 1098524 | 1099183             | -         | 219    | Ribulose-5-phosphate 4-epimerase and related epimerases and aldolases                               |   |     |                      |  |
|           | VBIBruSui107850_3338  | BRA1111 | 1099278 | 1100537             | -         | 419    | Predicted pyridoxine biosynthesis protein (probably from <i>Brucella abortus</i> )                  |   |     |                      |  |
|           | VBIBruSui107850_3339  | BRA1112 | 1100515 | 1101027             | -         | 170    | hypothetical protein                                                                                |   |     |                      |  |
|           | VBIBruSui107850_3340  | BRA1113 | 1101036 | 1101320             | +         | 94     | PEMK-LIKE PROTEIN 1                                                                                 |   |     |                      |  |
|           | VBIBruSui107850_3341  |         | 1101751 | 1102269             | +         | 172    | D-LACTATE DEHYDROGENASE                                                                             |   |     |                      |  |
|           | VBIBruSui107850_3342  | BRA1115 | 1102687 | 1102968             | -         | 93     | TRANSPOSASE                                                                                         |   |     |                      |  |
|           | VBIBruSui107850_3343  | BRA1116 | 1103223 | 1103846             | -         | 207    | TRANSPOSASE                                                                                         |   |     |                      |  |
|           | Brucella abortus 2308 | core_12 | GI3     | VBIBruMel86222_0263 |           | 256325 | 256654                                                                                              | + | 109 | hypothetical protein |  |
|           |                       |         |         | VBIBruMel86222_0264 | BAB1_0250 | 256868 | 258022                                                                                              | - | 384 | Integrase            |  |
|           |                       |         |         | VBIBruMel86222_0265 | BAB1_0252 | 258533 | 258751                                                                                              | - | 72  | hypothetical protein |  |

47632

|                           |         |           |                     |               |        |        |   |     |                                                                                |       |
|---------------------------|---------|-----------|---------------------|---------------|--------|--------|---|-----|--------------------------------------------------------------------------------|-------|
|                           |         |           | VBIBruMel86222_0266 | BAB1_0253     | 258752 | 258961 | - | 69  | hypothetical protein                                                           |       |
|                           |         |           | VBIBruMel86222_0267 | BAB1_0254     | 258928 | 259272 | - | 114 | hypothetical protein                                                           |       |
|                           |         |           | VBIBruMel86222_0268 | BAB1_0255     | 259269 | 260150 | - | 293 | virulence-associated protein E                                                 |       |
|                           |         |           | VBIBruMel86222_0269 |               | 260264 | 261310 | - | 348 | Hypothetical protein                                                           |       |
|                           |         |           | VBIBruMel86222_0270 |               | 261358 | 261675 | - | 105 | Hypothetical protein                                                           |       |
|                           |         |           | VBIBruMel86222_0271 |               | 262124 | 262261 | - | 45  | hypothetical protein                                                           |       |
|                           |         |           | VBIBruMel86222_0272 |               | 262266 | 262418 | - | 50  | hypothetical protein                                                           |       |
|                           |         |           | VBIBruMel86222_0273 | BAB1_0258     | 262547 | 263431 | - | 294 | hypothetical protein                                                           |       |
|                           |         |           | VBIBruMel86222_0274 | BAB1_0259     | 263566 | 263742 | - | 58  | hypothetical protein                                                           |       |
|                           |         |           | VBIBruMel86222_0275 | BAB1_0260     | 263940 | 265859 | - | 639 | <i>flgJ</i> Flagellar protein FlgJ [peptidoglycan hydrolase]                   |       |
|                           |         |           | VBIBruMel86222_0276 |               | 266369 | 266782 | - | 137 | Hypothetical Membrane Spanning Protein                                         |       |
|                           |         | NC_007618 | VBIBruMel86222_0277 |               | 266886 | 267890 | - | 334 | Hypothetical Membrane Spanning Protein                                         | 20296 |
|                           |         |           | VBIBruMel86222_0278 |               | 267873 | 268055 | + | 60  | hypothetical protein                                                           |       |
|                           |         |           | VBIBruMel86222_0279 | BAB1_0263     | 268232 | 268396 | - | 54  | hypothetical protein                                                           |       |
|                           |         |           | VBIBruMel86222_0280 | BAB1_0265     | 269352 | 269498 | - | 48  | hypothetical protein                                                           |       |
|                           |         |           | VBIBruMel86222_0281 | BAB1_0266     | 269495 | 269701 | - | 68  | hypothetical protein                                                           |       |
|                           |         |           | VBIBruMel86222_0282 |               | 269695 | 269862 | + | 55  | hypothetical protein                                                           |       |
|                           |         |           | VBIBruMel86222_0283 | BAB1_0268     | 270202 | 270435 | + | 77  | hypothetical protein                                                           |       |
|                           |         |           | VBIBruMel86222_0284 | BAB1_0270     | 270965 | 271513 | - | 182 | Zinc-dependent metalloproteinase                                               |       |
|                           |         |           | VBIBruMel86222_0285 | BAB1_0273     | 272920 | 273165 | + | 81  | hypothetical protein                                                           |       |
|                           |         |           | VBIBruMel86222_0286 | BAB1_0274     | 273261 | 273488 | - | 75  | hypothetical protein                                                           |       |
|                           |         |           | VBIBruMel86222_0287 | BAB1_0275     | 273554 | 273844 | - | 96  | hypothetical protein                                                           |       |
|                           |         |           | VBIBruMel86222_0288 | BAB1_0276     | 273841 | 274380 | - | 179 | hypothetical protein                                                           |       |
|                           |         |           | VBIBruMel86222_0289 |               | 274517 | 274654 | - | 45  | hypothetical protein                                                           |       |
|                           |         |           | VBIBruMel86222_0290 | BAB1_0277     | 274651 | 275259 | - | 202 | hypothetical protein                                                           |       |
|                           |         |           | VBIBruMel86222_0291 | BAB1_0279     | 275959 | 276621 | + | 220 | <i>btp1</i> hypothetical protein                                               |       |
| <i>Brucella ceti</i> Cudo | core 13 | 26.5kb    | VBIBruCet28239_2944 | BCETI_6000865 | 836910 | 837365 | - | 151 | TRM24 transposase                                                              |       |
|                           |         |           | VBIBruCet28239_2945 |               | 837548 | 837682 | - | 44  | hypothetical protein                                                           |       |
|                           |         |           | VBIBruCet28239_2946 | BCETI_6000867 | 838012 | 838788 | + | 258 | Modification methylase HindV                                                   |       |
|                           |         |           | VBIBruCet28239_2947 | BCETI_6000869 | 839825 | 840214 | + | 129 | hypothetical protein                                                           |       |
|                           |         |           | VBIBruCet28239_2948 |               | 840410 | 840646 | + | 78  | Transposase and inactivated derivatives-like protein                           |       |
|                           |         |           | VBIBruCet28239_2949 | BCETI_6000870 | 840844 | 841806 | + | 320 | transcriptional regulator, AraC family                                         |       |
|                           |         |           | VBIBruCet28239_2950 | BCETI_6000871 | 842058 | 843821 | - | 587 | N-methylhydantoinase B                                                         |       |
|                           |         |           | VBIBruCet28239_2951 | BCETI_6000872 | 843935 | 846016 | - | 693 | N-methylhydantoinase A                                                         |       |
|                           |         |           | VBIBruCet28239_2952 |               | 846074 | 847429 | - | 451 | Cytosine permease                                                              |       |
|                           |         |           | VBIBruCet28239_2953 | BCETI_6000873 | 847465 | 848841 | - | 458 | Adenosylmethionine-S-adenosyl-L-homocysteine                                   |       |
|                           |         |           | VBIBruCet28239_2954 |               | 848997 | 849110 | + | 37  | hypothetical protein                                                           |       |
|                           |         |           | VBIBruCet28239_2955 |               | 849279 | 849740 | + | 153 | DNA for TA region of Ti plasmid                                                |       |
|                           |         |           | VBIBruCet28239_2956 |               | 849691 | 851568 | - | 625 | Transposase                                                                    |       |
|                           |         |           | VBIBruCet28239_2957 | BCETI_6000875 | 851621 | 852211 | + | 196 | hypothetical protein                                                           |       |
|                           |         |           | VBIBruCet28239_2958 | BCETI_6000876 | 852582 | 853763 | + | 393 | 3-ketoacyl-CoA thiolase @ Acetyl-CoA acetyltransferase                         |       |
|                           |         |           | VBIBruCet28239_2959 | BCETI_6000877 | 853775 | 854704 | + | 309 | Electron transfer flavoprotein, alpha subunit                                  |       |
|                           |         |           | VBIBruCet28239_2960 | BCETI_6000878 | 854857 | 855603 | + | 248 | Electron transfer flavoprotein, beta subunit                                   |       |
|                           |         |           | VBIBruCet28239_2961 |               | 855732 | 856844 | + | 370 | Enoyl-CoA hydratase [isoleucine degradation] / 3-hydroxyacyl-CoA dehydrogenase |       |
|                           |         |           | VBIBruCet28239_2962 | BCETI_6000880 | 856932 | 858506 | + | 524 | COG0028: Thiamine pyrophosphate-requiring enzymes                              |       |

|                |  |  |  |  |  |  |  |  |                                                                                         |
|----------------|--|--|--|--|--|--|--|--|-----------------------------------------------------------------------------------------|
|                |  |  |  |  |  |  |  |  | Acetyl-CoA synthetase (ADP-forming) alpha and beta chains, putative                     |
|                |  |  |  |  |  |  |  |  | hypothetical protein                                                                    |
|                |  |  |  |  |  |  |  |  | probable acyl-CoA dehydrogenase                                                         |
|                |  |  |  |  |  |  |  |  | Enoyl-CoA hydratase                                                                     |
|                |  |  |  |  |  |  |  |  | Enoyl-CoA hydratase                                                                     |
|                |  |  |  |  |  |  |  |  | spermidine/putrescine ABC transporter, permease protein                                 |
|                |  |  |  |  |  |  |  |  | Spermidine Putrescine ABC transporter permease component PotB (TC 3.A.1.11.1)           |
|                |  |  |  |  |  |  |  |  | Spermidine Putrescine ABC transporter permease component PotB (TC 3.A.1.11.1)           |
|                |  |  |  |  |  |  |  |  | Putrescine transport ATP-binding protein PotA (TC 3.A.1.11.1)                           |
|                |  |  |  |  |  |  |  |  | ABC transporter, periplasmic spermidine putrescine-binding protein PotD (TC 3.A.1.11.1) |
|                |  |  |  |  |  |  |  |  | Enoyl-[acyl-carrier-protein] reductase [FMN]                                            |
|                |  |  |  |  |  |  |  |  | putative membrane protein                                                               |
|                |  |  |  |  |  |  |  |  | hypothetical protein                                                                    |
| NZ_ACJD0100006 |  |  |  |  |  |  |  |  | Enoyl-CoA hydratase                                                                     |
|                |  |  |  |  |  |  |  |  | aldehyde dehydrogenase family protein                                                   |
|                |  |  |  |  |  |  |  |  | aldehyde dehydrogenase family protein                                                   |
|                |  |  |  |  |  |  |  |  | hypothetical protein                                                                    |
|                |  |  |  |  |  |  |  |  | hypothetical protein                                                                    |
|                |  |  |  |  |  |  |  |  | ISBm1, transposase orfA                                                                 |
|                |  |  |  |  |  |  |  |  | TRANSPOSASE                                                                             |
|                |  |  |  |  |  |  |  |  | hypothetical protein                                                                    |
|                |  |  |  |  |  |  |  |  | hypothetical protein                                                                    |
|                |  |  |  |  |  |  |  |  | putative cytoplasmic protein                                                            |
|                |  |  |  |  |  |  |  |  | TRANSPOSASE                                                                             |
|                |  |  |  |  |  |  |  |  | TRANSPOSASE                                                                             |
|                |  |  |  |  |  |  |  |  | hypothetical protein                                                                    |
|                |  |  |  |  |  |  |  |  | hypothetical protein                                                                    |
|                |  |  |  |  |  |  |  |  | transposase                                                                             |
|                |  |  |  |  |  |  |  |  | Transposase                                                                             |
|                |  |  |  |  |  |  |  |  | hypothetical protein                                                                    |
|                |  |  |  |  |  |  |  |  | hypothetical protein                                                                    |
|                |  |  |  |  |  |  |  |  | Possible integrase-like protein                                                         |
|                |  |  |  |  |  |  |  |  | IS3 family element, transposase orfB                                                    |
|                |  |  |  |  |  |  |  |  | hypothetical protein                                                                    |
|                |  |  |  |  |  |  |  |  | hypothetical protein                                                                    |
|                |  |  |  |  |  |  |  |  | hypothetical protein                                                                    |
|                |  |  |  |  |  |  |  |  | putative ABC transporter ATP-binding protein                                            |
|                |  |  |  |  |  |  |  |  | Oligopeptide transport ATP-binding protein OppD (TC 3.A.1.5.1)                          |

65330
